# Supplementary material for: Pd/NHC sequentially catalyzed atroposelective synthesis of planar-chiral macrocycles
Source: Royal Society of Chemistry journal article supplement (doi:10.1039/d4sc05482b), 2024-01-01
Supplement: d4sc05482b1.pdf [file d4sc05482b1.pdf]

## Supplemental Information

### **Pd/NHC sequentially catalyzed atroposelective synthesis of planar-chiral macrocycles**

Gongming Yang, Shangde Liu, Shujie Ji, Xingsen Wu, Jian Wang\*

School of Pharmaceutical Sciences, Key Laboratory of Bioorganic Phosphorous  
Chemistry and Chemical Biology (Ministry of Education)  
Tsinghua University  
Beijing, 100084, China

\*Correspondence: wangjian2012@tsinghua.edu.cn

#### **Table of Contents**

|                                                                                             |     |
|---------------------------------------------------------------------------------------------|-----|
| <a href="#">General Information</a> .....                                                   | 2   |
| <a href="#">General Procedure for the Synthesis of Substrates</a> .....                     | 2   |
| <a href="#">Characterization Data</a> .....                                                 | 3   |
| <a href="#">Reaction Condition Optimization</a> .....                                       | 12  |
| <a href="#">General Procedure for Atroposelective Intermolecular Macrocyclization</a> ..... | 13  |
| <a href="#">Characterization Data of Planar Chiral Products</a> .....                       | 14  |
| <a href="#">Investigations on the Thermal Stability of the Planar-Chirality</a> .....       | 43  |
| <a href="#">Dependence of Thermal Stability on Temperature</a> .....                        | 43  |
| <a href="#">Experimental Determination of Rotation Barrier of <b>4o</b></a> .....           | 45  |
| <a href="#">Gram-Scale Synthesis and Synthetic Transformations</a> .....                    | 47  |
| <a href="#">Gram-Scale Synthesis of <b>3a</b></a> .....                                     | 47  |
| <a href="#">Synthetic Transformations of <b>3a</b></a> .....                                | 48  |
| <a href="#">Sonogashira Coupling</a> .....                                                  | 48  |
| <a href="#">Expoidation</a> .....                                                           | 49  |
| <a href="#">Control Experiments</a> .....                                                   | 50  |
| <a href="#">Mechanistic Studies</a> .....                                                   | 52  |
| <a href="#">Crystal Structure of <b>3q</b></a> .....                                        | 53  |
| <a href="#">NMR Spectra</a> .....                                                           | 56  |
| <a href="#">HPLC Spectra</a> .....                                                          | 114 |
| <a href="#">Supplementary References</a> .....                                              | 151 |

## General Information

Chemicals and solvents were purchased from commercial suppliers and used as received.  $^1\text{H}$  and  $^{13}\text{C}$  NMR spectra were recorded on a Bruker ACF400 (400 MHz) spectrometer. Chemical shifts were reported in parts per million (ppm), and the residual solvent peak was used as an internal reference: proton (chloroform  $\delta$  7.26), carbon (chloroform  $\delta$  77.0) or tetramethylsilane (TMS  $\delta$  0.00) was used as a reference. Multiplicity was indicated as follows: s (singlet), d (doublet), t (triplet), q (quartet), m (multiplet), dd (doublet of doublet), bs (broad singlet). Coupling constants were reported in Hertz (Hz). Low resolution mass spectra were obtained on a Finnigan/MAT LCQ spectrometer in ESI mode, and a Finnigan/MAT 95XL-T mass spectrometer in EI mode. All high resolution mass spectra were obtained on a Finnigan/MAT 95XL-T spectrometer. For thin layer chromatography (TLC), Merck pre-coated TLC plates (Merck 60 F254) were used, and compounds were visualized with a UV light at 254 nm. Flash chromatography separations were performed on Merck 60 (0.040-0.063 mm) mesh silica gel. The enantiomeric excesses of products were determined by chiral phase HPLC analysis. Optical rotations were recorded on Jasco DIP-1000 polarimeter.

## General Procedure for the Synthesis of Substrates

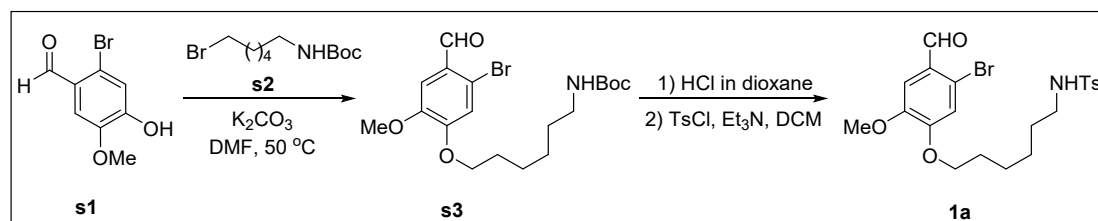

Note: All of the aryl aldehydes<sup>1</sup> and *tert*-butyl-bromohexyl-carbamate<sup>2</sup> were synthesized according to the reported methods.

The mixture of 2-bromo-4-hydroxy-5-methoxybenzaldehyde (**s1**) (5 mmol, 1.0 equiv.), *tert*-butyl (6-bromohexyl) carbamate (**s2**) (6 mmol, 1.0 equiv.),  $\text{K}_2\text{CO}_3$  (15 mmol, 3 equiv.), DMF (10 mL), were heated  $50^\circ\text{C}$  for 6 h under argon atmosphere.

After cooling to room temperature, the reaction was quenched by H<sub>2</sub>O, The crude mixture was extracted with EtOAc (x3) and the combined organic extracts were washed with brine, dried (Na<sub>2</sub>SO<sub>4</sub>), and concentrated in vacuo. The residue was purified by column chromatography (silica gel, hexane/EtOAc = 2/1) to give **s3** as colorless oil (2.07 g, 96%yield).

To a solution of obtained **s3** (4.8 mmol, 1.0 equiv.) in EtOAc, then the mixture was cooled to 0 °C, and HCl in dioxane (4 equiv. 4.0 M) added slowly. After that, the mixture was allowed warmed to room temperature and stirred for about 3 h (then the white solid was formed). Then the mixture was concentrated in vacuo. Lastly, the obtained crud product was dissolved in CH<sub>2</sub>Cl<sub>2</sub>/pyridine (v:v = 2/1, 15 mL) at 0 °C, then TsCl (5.76 mmol, 1.2 equiv.) in CH<sub>2</sub>Cl<sub>2</sub> (5 mL) was added dropwise. After that, the mixture was warmed to room temperature and stirred for 12 h. Then the reaction was quenched by H<sub>2</sub>O, and neutralized with 1 N HCl aqueous solution and extracted with EtOAc (x3) and the combined organic extracts were washed with brine, dried (Na<sub>2</sub>SO<sub>4</sub>), and concentrated in vacuo. The residue was purified by column chromatography (silica gel, hexane/EtOAc = 2/1) to give **1a** as a white solid (3.2 g, 86% yield in total).

**Note:** All of the vinyl ethylene carbonates (VECs) are known compounds and were synthesized according to the previously reported procedures and all characterization data are in accordance with the literature.<sup>3</sup>

### Characterization Data

#### *N*-(6-(5-bromo-4-formyl-2-methoxyphenoxy)hexyl)-4-methylbenzenesulfonamide (**1a**)

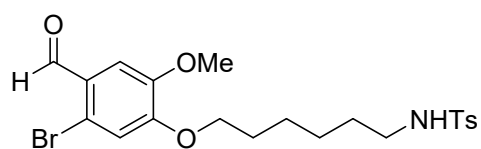

**1a**

Following the general procedure, the crude product was purified by column chromatography on a silica gel to afford the product (3.2 g, 86% yield) as White solid.

$R_f$  (pentane:EtOAc = 2:1) = 0.25;  $^1\text{H NMR}$  (400 MHz, Chloroform-*d*)  $\delta$  10.19 (s, 1H), 7.76 (d,  $J$  = 8.3 Hz, 2H), 7.42 (s, 1H), 7.32 (d,  $J$  = 8.0 Hz, 2H), 7.03 (s, 1H), 4.65 (t,  $J$  = 6.2 Hz, 1H), 4.04 (t,  $J$  = 6.5 Hz, 2H), 3.90 (s, 3H), 2.97 (q,  $J$  = 6.7 Hz, 2H), 2.44 (s, 3H), 1.83 (p,  $J$  = 6.7 Hz, 2H), 1.51 (q,  $J$  = 7.3 Hz, 2H), 1.47 – 1.25 (m, 4H).  $^{13}\text{C NMR}$  (100 MHz, Chloroform-*d*)  $\delta$  190.8, 154.1, 149.1, 143.3, 137.0, 129.7, 127.1, 126.3, 120.3, 116.3, 110.7, 69.3, 56.2, 43.1, 29.5, 28.6, 26.2, 25.4, 21.5; **HRMS** (ESI):  $m/z$ : calculated for  $\text{C}_{21}\text{H}_{27}\text{BrNO}_5\text{S}$ :  $[\text{M} + \text{H}]^+$  484.0788, found: 484.0795.

***N*-(6-(2,5-dibromo-4-formylphenoxy)hexyl)-4-methylbenzenesulfonamide (1b)**

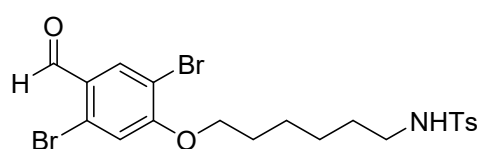

**1b**

Following the general procedure, the crude product was purified by column chromatography on a silica gel to afford the product (420 mg, 78% yield) as White solid.  $R_f$  (pentane:EtOAc = 2:1) = 0.25;  $^1\text{H NMR}$  (400 MHz, Chloroform-*d*)  $\delta$  10.16 (s, 1H), 8.12 (s, 1H), 7.77 (d,  $J$  = 7.9 Hz, 2H), 7.33 (d,  $J$  = 8.0 Hz, 2H), 7.07 (s, 1H), 4.57 (t,  $J$  = 6.2 Hz, 1H), 4.08 (t,  $J$  = 6.2 Hz, 2H), 2.98 (q,  $J$  = 6.7 Hz, 2H), 2.45 (s, 3H), 1.89 – 1.78 (m, 2H), 1.56 – 1.46 (m, 4H), 1.44 – 1.36 (m, 2H).  $^{13}\text{C NMR}$  (100 MHz, Chloroform-*d*)  $\delta$  189.4, 160.1, 143.4, 137.0, 134.1, 129.7, 127.4, 127.3, 127.1, 116.9, 112.3, 69.8, 43.1, 29.5, 28.5, 26.1, 25.4, 21.5; **HRMS** (ESI):  $m/z$ : calculated for  $\text{C}_{20}\text{H}_{24}\text{Br}_2\text{NO}_4\text{S}$ :  $[\text{M} + \text{H}]^+$  533.9767, found: 533.9776.

***N*-(6-(5-bromo-2-chloro-4-formylphenoxy)hexyl)-4-methylbenzenesulfonamide**

**(1c)**

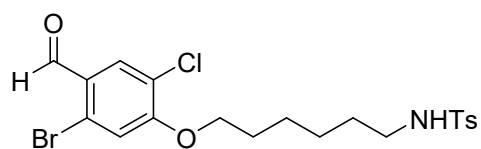

**1c**

Following the general procedure, the crude product was purified by column chromatography on a silica gel to afford the product (385 mg, 79% yield) as White solid.  $R_f$  (pentane:EtOAc = 2:1) = 0.25;  $^1\text{H NMR}$  (400 MHz, Chloroform-*d*)  $\delta$  10.17

(s, 1H), 7.95 (s, 1H), 7.77 (d,  $J = 7.8$  Hz, 2H), 7.33 (d,  $J = 7.9$  Hz, 2H), 7.11 (s, 1H), 4.44 (t,  $J = 6.2$  Hz, 1H), 4.09 (t,  $J = 6.3$  Hz, 2H), 2.98 (q,  $J = 6.7$  Hz, 2H), 2.45 (s, 3H), 1.90 – 1.78 (m, 2H), 1.58 – 1.47 (m, 4H), 1.44 – 1.36 (m, 2H).  $^{13}\text{C}$  NMR (100 MHz, Chloroform-*d*)  $\delta$  189.6, 159.2, 143.4, 137.0, 130.9, 129.7, 127.1, 127.0, 126.5, 123.5, 117.1, 69.7, 43.1, 29.5, 28.5, 26.1, 25.4, 21.5; HRMS (ESI):  $m/z$ : calculated for  $\text{C}_{20}\text{H}_{24}\text{BrClNO}_4\text{S}$ :  $[\text{M} + \text{H}]^+$  488.0293, found: 488.0301.

**Ethyl 4-bromo-5-formyl-2-((6-((4-methylphenyl)sulfonamido)hexyl)oxy)benzoate (1d)**

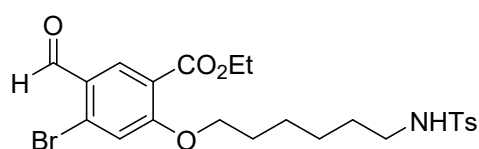

**1d**

Following the general procedure, the crude product was purified by column chromatography on a silica gel to afford the product (426 mg, 81% yield) as White solid.  $R_f$  (pentane:EtOAc = 2:1) = 0.25;  $^1\text{H}$  NMR (400 MHz, Chloroform-*d*)  $\delta$  10.21 (s, 1H), 8.35 (s, 1H), 7.75 (d,  $J = 7.9$  Hz, 2H), 7.31 (d,  $J = 8.1$  Hz, 2H), 7.17 (s, 1H), 4.81 (t,  $J = 6.2$  Hz, 1H), 4.35 (q,  $J = 7.1$  Hz, 2H), 4.09 (t,  $J = 6.2$  Hz, 2H), 2.96 (q,  $J = 6.6$  Hz, 2H), 2.43 (s, 3H), 1.88 – 1.78 (m, 2H), 1.55 – 1.44 (m, 4H), 1.41 – 1.34 (m, 5H).  $^{13}\text{C}$  NMR (100 MHz, Chloroform-*d*)  $\delta$  189.7, 164.5, 162.6, 143.3, 137.2, 133.4, 132.0, 129.7, 127.1, 126.2, 120.7, 117.5, 69.6, 61.4, 43.0, 29.4, 28.5, 26.0, 25.4, 21.49, 14.3; HRMS (ESI):  $m/z$ : calculated for  $\text{C}_{23}\text{H}_{29}\text{BrNO}_6\text{S}$ :  $[\text{M} + \text{H}]^+$  526.0894, found: 526.0900.

***N*-(6-(3-bromo-4-formyl-2,6-dimethoxyphenoxy)hexyl)-4-methylbenzenesulfonamide (1e)**

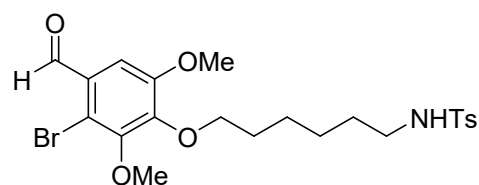

**1e**

Following the general procedure, the crude product was purified by column chromatography on a silica gel to afford the product (387 mg, 75% yield) as White

solid.  $R_f$  (pentane:EtOAc = 2:1) = 0.20;  $^1\text{H NMR}$  (400 MHz, Chloroform-*d*)  $\delta$  10.32 (s, 1H), 7.79 – 7.74 (m, 2H), 7.33 (t,  $J$  = 4.0 Hz, 3H), 4.39 (q,  $J$  = 9.3, 6.3 Hz, 1H), 4.10 (t,  $J$  = 6.5 Hz, 2H), 3.91 (s, 6H), 2.97 (p,  $J$  = 6.3 Hz, 2H), 2.45 (s, 3H), 1.81 – 1.69 (m, 2H), 1.56 – 1.44 (m, 4H), 1.42 – 1.34 (m, 2H).  $^{13}\text{C NMR}$  (100 MHz, Chloroform-*d*)  $\delta$  191.1, 153.3, 148.1, 143.4, 137.0, 129.7, 128.8, 127.1, 115.6, 107.6, 73.9, 61.2, 56.2, 43.1, 29.9, 29.6, 26.2, 25.3, 21.5; **HRMS** (ESI):  $m/z$ : calculated for  $\text{C}_{22}\text{H}_{29}\text{BrNO}_6\text{S}$ :  $[\text{M} + \text{H}]^+$  514.0894, found: 514.0901.

***N*-(6-(5-bromo-4-formyl-2-methylphenoxy)hexyl)-4-methylbenzenesulfonamide**

**(1f)**

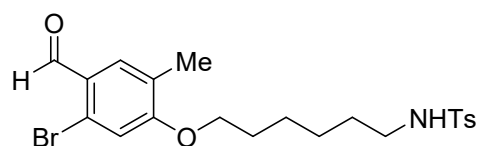

**1f**

Following the general procedure, the crude product was purified by column chromatography on a silica gel to afford the product (400 mg, 85% yield) as White solid.  $R_f$  (pentane:EtOAc = 2:1) = 0.25;  $^1\text{H NMR}$  (400 MHz, DMSO-*d*<sub>6</sub>)  $\delta$  10.07 (s, 1H), 7.68 (d,  $J$  = 1.7 Hz, 1H), 7.67 – 7.65 (m, 2H), 7.47 (t,  $J$  = 5.8 Hz, 1H), 7.39 (d,  $J$  = 8.0 Hz, 2H), 7.27 (s, 1H), 4.09 (t,  $J$  = 6.4 Hz, 2H), 2.71 (q,  $J$  = 6.6 Hz, 2H), 2.38 (s, 3H), 2.18 – 2.08 (m, 3H), 1.75 – 1.62 (m, 2H), 1.41 – 1.23 (m, 6H).  $^{13}\text{C NMR}$  (100 MHz, DMSO-*d*<sub>6</sub>)  $\delta$  190.6, 142.9, 138.2, 131.5, 130.0, 127.04, 126.95, 126.1, 116.2, 69.1, 42.9, 29.3, 28.7, 26.1, 25.3, 21.4, 15.9; **HRMS** (ESI):  $m/z$ : calculated for  $\text{C}_{21}\text{H}_{27}\text{BrNO}_4\text{S}$ :  $[\text{M} + \text{H}]^+$  468.0839, found: 468.0844.

***N*-(6-(2,5-dichloro-4-formylphenoxy)hexyl)-4-methylbenzenesulfonamide (1g)**

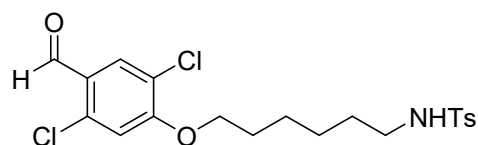

**1g**

Following the general procedure, the crude product was purified by column chromatography on a silica gel to afford the product (343 mg, 77% yield) as White solid.  $R_f$  (pentane:EtOAc = 2:1) = 0.25;  $^1\text{H NMR}$  (400 MHz, Chloroform-*d*)  $\delta$  10.29

(s, 1H), 7.95 (s, 1H), 7.77 (d,  $J = 8.0$  Hz, 2H), 7.33 (d,  $J = 8.0$  Hz, 2H), 6.93 (s, 1H), 4.53 (t,  $J = 6.3$  Hz, 1H), 4.08 (t,  $J = 6.3$  Hz, 2H), 2.98 (q,  $J = 6.7$  Hz, 2H), 2.45 (s, 3H), 1.90 – 1.80 (m, 2H), 1.58 – 1.45 (m, 4H), 1.45 – 1.35 (m, 2H).  $^{13}\text{C}$  NMR (100 MHz, Chloroform-*d*)  $\delta$  187.5, 159.2, 143.4, 137.8, 137.0, 130.5, 129.7, 127.1, 125.9, 122.8, 113.9, 69.7, 43.0, 29.5, 28.5, 26.1, 25.4, 21.5; HRMS (ESI):  $m/z$ : calculated for  $\text{C}_{20}\text{H}_{24}\text{Cl}_2\text{NO}_4\text{S}$ :  $[\text{M} + \text{H}]^+$  444.0798, found: 444.0805.

***N*-(6-(5-chloro-4-formyl-2-methoxyphenoxy)hexyl)-4-methylbenzenesulfonamide (1h)**

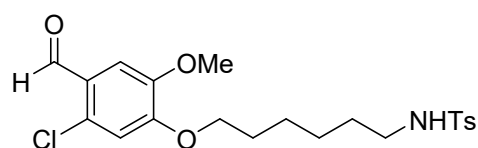

**1h**

Following the general procedure, the crude product was purified by column chromatography on a silica gel to afford the product (352 mg, 80% yield) as White solid.  $R_f$  (pentane:EtOAc = 2:1) = 0.25;  $^1\text{H}$  NMR (400 MHz, Chloroform-*d*)  $\delta$  10.33 (s, 1H), 7.76 (d,  $J = 8.3$  Hz, 2H), 7.40 (s, 1H), 7.32 (d,  $J = 8.0$  Hz, 2H), 6.86 (s, 1H), 4.51 (t,  $J = 6.3$  Hz, 1H), 4.05 (t,  $J = 6.6$  Hz, 2H), 3.91 (s, 3H), 2.97 (q,  $J = 6.7$  Hz, 2H), 2.44 (s, 3H), 1.90 – 1.80 (m, 2H), 1.55 – 1.36 (m, 6H).  $^{13}\text{C}$  NMR (100 MHz, Chloroform-*d*)  $\delta$  188.7, 154.1, 148.6, 143.4, 137.1, 131.9, 129.7, 127.1, 125.3, 113.2, 110.0, 69.3, 56.2, 43.1, 29.5, 28.6, 26.2, 25.4, 21.5; HRMS (ESI):  $m/z$ : calculated for  $\text{C}_{21}\text{H}_{27}\text{ClNO}_5\text{S}$ :  $[\text{M} + \text{H}]^+$  440.1293, found: 440.1299.

***N*-(6-((6-formyl-4-methoxy-[1,1'-biphenyl]-3-yl)oxy)hexyl)-4-methylbenzenesulfonamide (1i)**

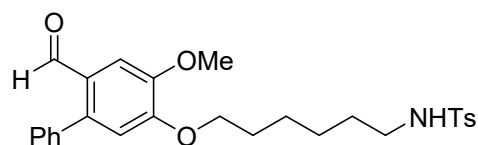

**1i**

Following the general procedure, the crude product was purified by column chromatography on a silica gel to afford the product (405 mg, 84% yield) as White solid.  $R_f$  (pentane:EtOAc = 2:1) = 0.25;  $^1\text{H}$  NMR (400 MHz, Chloroform-*d*)  $\delta$  9.83 (s,

1H), 7.76 (d,  $J = 7.9$  Hz, 2H), 7.55 (s, 1H), 7.51 – 7.43 (m, 3H), 7.42 – 7.36 (m, 2H), 7.31 (d,  $J = 8.0$  Hz, 2H), 6.84 (s, 1H), 4.60 (t,  $J = 6.2$  Hz, 1H), 4.08 (t,  $J = 6.6$  Hz, 2H), 3.97 (s, 3H), 2.96 (q,  $J = 6.7$  Hz, 2H), 2.43 (s, 3H), 1.90 – 1.79 (m, 2H), 1.57 – 1.42 (m, 4H), 1.41 – 1.33 (m, 2H).  $^{13}\text{C}$  NMR (100 MHz, Chloroform-*d*)  $\delta$  191.2, 153.0, 149.0, 143.3, 141.4, 137.7, 137.0, 130.2, 129.7, 128.3, 128.0, 127.1, 126.7, 113.6, 108.9, 68.9, 56.1, 43.1, 29.5, 28.7, 26.2, 25.5, 21.5; HRMS (ESI):  $m/z$ : calculated for  $\text{C}_{27}\text{H}_{32}\text{NO}_5\text{S}$ :  $[\text{M} + \text{H}]^+$  482.1996, found: 482.2000.

***N*-(6-(4-formyl-2-methoxy-5-(thiophen-3-yl)phenoxy)hexyl)-4-methylbenzenesulfonamide (1j)**

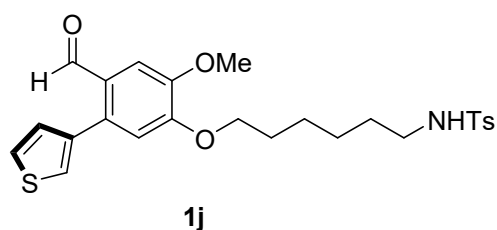

Following the general procedure, the crude product was purified by column chromatography on a silica gel to afford the product (395 mg, 81% yield) as White solid.  $R_f$  (pentane:EtOAc = 2:1) = 0.25;  $^1\text{H}$  NMR (400 MHz, Chloroform-*d*)  $\delta$  9.95 (s, 1H), 7.75 (d,  $J = 8.2$  Hz, 2H), 7.52 (s, 1H), 7.45 (dd,  $J = 4.9, 3.0$  Hz, 1H), 7.31 (d,  $J = 8.1$  Hz, 2H), 7.19 (dd,  $J = 4.9, 1.3$  Hz, 1H), 6.86 (s, 1H), 4.54 (t,  $J = 6.2$  Hz, 1H), 4.08 (t,  $J = 6.6$  Hz, 2H), 3.96 (s, 3H), 2.96 (q,  $J = 6.7$  Hz, 2H), 2.43 (s, 3H), 1.90 – 1.79 (m, 2H), 1.54 – 1.35 (m, 6H).  $^{13}\text{C}$  NMR (100 MHz, Chloroform-*d*)  $\delta$  191.0, 153.1, 149.0, 143.3, 138.1, 137.1, 135.9, 129.7, 129.5, 127.2, 127.1, 126.0, 124.7, 113.4, 108.9, 68.9, 56.1, 43.1, 29.5, 28.7, 26.2, 25.5, 21.5; HRMS (ESI):  $m/z$ : calculated for  $\text{C}_{25}\text{H}_{30}\text{NO}_5\text{S}_2$ :  $[\text{M} + \text{H}]^+$  488.1560, found: 488.1569.

***N*-(6-(4-formyl-2-methoxy-5-(thiophen-2-yl)phenoxy)hexyl)-4-methylbenzenesulfonamide (1k)**

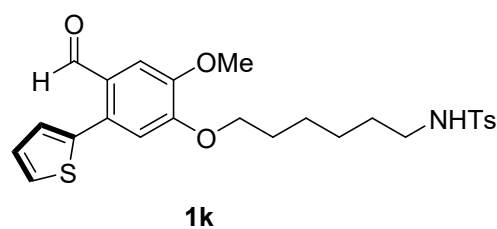

Following the general procedure, the crude product was purified by column



chromatography on a silica gel to afford the product (389 mg, 80% yield) as White solid.  $R_f$  (pentane:EtOAc = 2:1) = 0.25;  $^1\text{H NMR}$  (400 MHz, Chloroform-*d*)  $\delta$  10.04 (s, 1H), 7.76 (d,  $J$  = 7.8 Hz, 2H), 7.52 (s, 1H), 7.45 (d,  $J$  = 5.1 Hz, 1H), 7.31 (d,  $J$  = 8.0 Hz, 2H), 7.14 (s, 1H), 7.07 (s, 1H), 6.92 (s, 1H), 4.62 (t,  $J$  = 6.2 Hz, 1H), 4.08 (t,  $J$  = 6.6 Hz, 2H), 3.96 (s, 3H), 2.96 (q,  $J$  = 6.8 Hz, 2H), 2.43 (s, 3H), 1.90 – 1.79 (m, 2H), 1.56 – 1.33 (m, 6H).  $^{13}\text{C NMR}$  (100 MHz, Chloroform-*d*)  $\delta$  190.8, 152.9, 149.4, 143.4, 138.7, 137.0, 133.2, 129.7, 129.3, 127.6, 127.5, 127.1, 126.9, 114.1, 109.0, 67.0, 56.2, 43.1, 29.5, 28.7, 26.2, 25.5, 21.5; **HRMS** (ESI):  $m/z$ : calculated for  $\text{C}_{25}\text{H}_{30}\text{NO}_5\text{S}_2$ :  $[\text{M} + \text{H}]^+$  488.1560, found: 488.1567.

***N*-(6-(4-formyl-5-(furan-2-yl)-2-methoxyphenoxy)hexyl)-4-methylbenzenesulfonamide (11)**

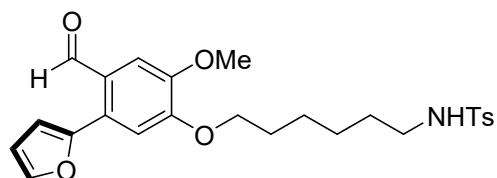

**11**

Following the general procedure, the crude product was purified by column chromatography on a silica gel to afford the product (365 mg, 77% yield) as White solid.  $R_f$  (pentane:EtOAc = 2:1) = 0.25;  $^1\text{H NMR}$  (400 MHz, Chloroform-*d*)  $\delta$  10.24 (s, 1H), 7.76 (d,  $J$  = 7.8 Hz, 2H), 7.60 (s, 1H), 7.51 (s, 1H), 7.31 (d,  $J$  = 7.9 Hz, 2H), 7.07 (s, 1H), 6.55 (d,  $J$  = 4.5 Hz, 2H), 4.53 (t,  $J$  = 6.2 Hz, 1H), 4.10 (t,  $J$  = 6.6 Hz, 2H), 3.95 (s, 3H), 2.97 (q,  $J$  = 6.7 Hz, 2H), 2.43 (s, 3H), 1.91 – 1.81 (m, 2H), 1.55 – 1.36 (m, 6H).  $^{13}\text{C NMR}$  (100 MHz, Chloroform-*d*)  $\delta$  190.8, 153.1, 150.5, 149.3, 143.5, 143.4, 137.0, 129.7, 128.9, 127.1, 126.6, 111.8, 111.3, 111.1, 109.1, 67.0, 56.1, 43.1, 29.5, 28.7, 26.2, 25.5, 21.5; **HRMS** (ESI):  $m/z$ : calculated for  $\text{C}_{25}\text{H}_{30}\text{NO}_6\text{S}$ :  $[\text{M} + \text{H}]^+$  472.1789, found: 472.1794.

**2-(5-bromo-4-formyl-2-methoxyphenoxy)ethyl 3-((4-methylphenyl)sulfonamido)propanoate (1m)**

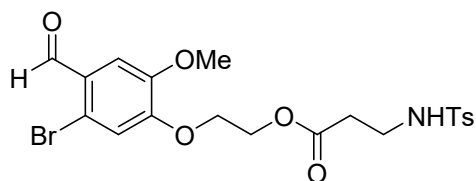

**1m**

Following the general procedure, the crude product was purified by column chromatography on a silica gel to afford the product (340 mg, 68% yield) as White solid.  $R_f$  (pentane:EtOAc = 1:1) = 0.30;  $^1\text{H NMR}$  (400 MHz, DMSO- $d_6$ )  $\delta$  7.72 – 7.63 (m, 3H), 7.43 – 7.33 (m, 4H), 4.34 (s, 4H), 3.82 (s, 3H), 3.01 – 2.92 (m, 2H), 2.47 (t,  $J$  = 6.9 Hz, 2H), 2.38 (s, 3H).  $^{13}\text{C NMR}$  (100 MHz, DMSO- $d_6$ )  $\delta$  190.7, 171.1, 149.1, 143.2, 137.7, 130.1, 127.0, 126.5, 119.6, 117.4, 111.4, 67.7, 62.8, 56.2, 38.8, 34.4, 21.4; **HRMS** (ESI):  $m/z$ : calculated for  $\text{C}_{20}\text{H}_{23}\text{BrNO}_7\text{S}$ :  $[\text{M} + \text{H}]^+$  500.0374, found: 500.0381.

***N*-(3-(2-(5-bromo-4-formyl-2-methoxyphenoxy)ethoxy)propyl)-4-methylbenzenesulfonamide (1n)**

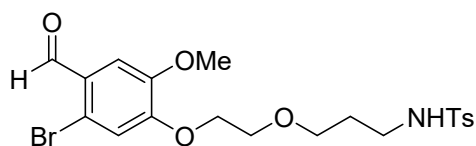

**1n**

Following the general procedure, the crude product was purified by column chromatography on a silica gel to afford the product (317 mg, 65% yield) as White solid.  $R_f$  (pentane:EtOAc = 1:1) = 0.30;  $^1\text{H NMR}$  (400 MHz, DMSO- $d_6$ )  $\delta$  10.07 (s, 1H), 7.66 (d,  $J$  = 8.2 Hz, 2H), 7.49 (t,  $J$  = 5.9 Hz, 1H), 7.38 (d,  $J$  = 8.0 Hz, 2H), 7.34 (s, 2H), 4.25 – 4.18 (m, 2H), 3.81 (s, 3H), 3.70 – 3.63 (m, 2H), 3.43 (t,  $J$  = 6.2 Hz, 2H), 2.77 (q,  $J$  = 6.8 Hz, 2H), 2.38 (s, 3H), 1.61 (q,  $J$  = 6.6 Hz, 2H).  $^{13}\text{C NMR}$  (100 MHz, DMSO- $d_6$ )  $\delta$  190.7, 154.3, 149.1, 143.0, 138.1, 130.0, 127.0, 126.3, 119.6, 117.3, 111.3, 69.1, 68.7, 68.0, 56.2, 29.8, 21.4; **HRMS** (ESI):  $m/z$ : calculated for  $\text{C}_{20}\text{H}_{25}\text{BrNO}_6\text{S}$ :  $[\text{M} + \text{H}]^+$  486.0581, found: 486.0590.

***N*-(5-(5-bromo-4-formyl-2-methoxyphenoxy)pentyl)-4-methylbenzenesulfonamide (1o)**

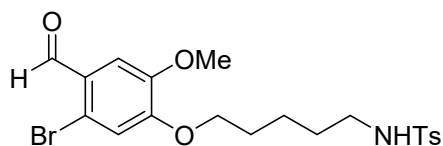

**1o**

Following the general procedure, the crude product was purified by column chromatography on a silica gel to afford the product (373 mg, 79% yield) as White solid.  $R_f$  (pentane:EtOAc = 2:1) = 0.30;  $^1\text{H NMR}$  (400 MHz, DMSO- $d_6$ )  $\delta$  10.07 (s, 1H), 7.72 – 7.64 (m, 2H), 7.51 (t,  $J$  = 5.9 Hz, 1H), 7.39 (d,  $J$  = 8.0 Hz, 2H), 7.32 (d,  $J$  = 13.0 Hz, 2H), 4.05 (t,  $J$  = 6.5 Hz, 2H), 3.82 (s, 3H), 2.72 (q,  $J$  = 6.4 Hz, 2H), 2.37 (s, 3H), 1.67 (p,  $J$  = 6.8 Hz, 2H), 1.47 – 1.34 (m, 4H).  $^{13}\text{C NMR}$  (100 MHz, DMSO- $d_6$ )  $\delta$  190.7, 154.4, 149.1, 142.9, 138.2, 130.0, 127.0, 126.1, 119.8, 117.0, 111.1, 69.4, 56.2, 42.8, 29.0, 28.3, 23.0, 21.4; **HRMS** (ESI):  $m/z$ : calculated for  $\text{C}_{20}\text{H}_{25}\text{BrNO}_5\text{S}$ :  $[\text{M} + \text{H}]^+$  470.0632, found: 470.0638.

***N*-(7-(5-bromo-4-formyl-2-methoxyphenoxy)heptyl)-4-methylbenzenesulfonamide (1p)**

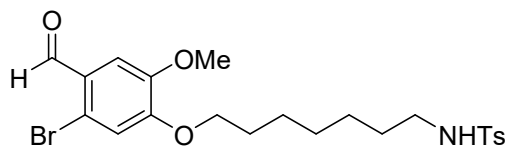

**1p**

Following the general procedure, the crude product was purified by column chromatography on a silica gel to afford the product (420 mg, 84% yield) as White solid.  $R_f$  (pentane:EtOAc = 2:1) = 0.30;  $^1\text{H NMR}$  (400 MHz, DMSO- $d_6$ )  $\delta$  10.07 (s, 1H), 7.70 – 7.65 (m, 2H), 7.48 (t,  $J$  = 5.8 Hz, 1H), 7.39 (d,  $J$  = 8.0 Hz, 2H), 7.32 (d,  $J$  = 8.1 Hz, 2H), 4.08 (t,  $J$  = 6.5 Hz, 2H), 3.82 (s, 3H), 2.69 (dq,  $J$  = 12.1, 6.8 Hz, 2H), 2.38 (s, 3H), 1.70 (p,  $J$  = 6.8 Hz, 2H), 1.33 (p,  $J$  = 7.2 Hz, 4H), 1.27 – 1.19 (m, 4H).  $^{13}\text{C NMR}$  (101 MHz, DMSO- $d_6$ )  $\delta$  190.6, 154.5, 149.1, 142.9, 138.3, 130.0, 126.9, 126.1, 119.8, 117.0, 111.2, 69.5, 56.2, 42.9, 29.3, 28.7, 28.6, 26.4, 25.7, 21.4; **HRMS** (ESI):  $m/z$ : calculated for  $\text{C}_{22}\text{H}_{29}\text{BrNO}_5\text{S}$ :  $[\text{M} + \text{H}]^+$  498.0945, found: 498.0952.

***N*-(8-(5-bromo-4-formyl-2-methoxyphenoxy)octyl)-4-methylbenzenesulfonamide (1q)**

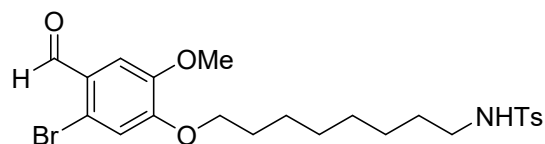

**1q**

Following the general procedure, the crude product was purified by column chromatography on a silica gel to afford the product (437 mg, 85% yield) as White solid.  $R_f$  (pentane:EtOAc = 2:1) = 0.30;  $^1\text{H NMR}$  (400 MHz, Chloroform-*d*)  $\delta$  10.20 (s, 1H), 7.76 (d,  $J$  = 8.2 Hz, 2H), 7.43 (s, 1H), 7.33 (d,  $J$  = 8.0 Hz, 2H), 7.05 (s, 1H), 4.30 (d,  $J$  = 6.1 Hz, 1H), 4.08 (t,  $J$  = 6.7 Hz, 2H), 3.92 (s, 3H), 2.96 (q,  $J$  = 6.7 Hz, 2H), 2.45 (s, 3H), 1.92 – 1.82 (m, 2H), 1.51 – 1.42 (m, 4H), 1.35 – 1.27 (m, 6H).  $^{13}\text{C NMR}$  (100 MHz, Chloroform-*d*)  $\delta$  190.8, 154.2, 149.1, 143.3, 137.1, 129.7, 127.1, 126.3, 120.3, 116.3, 110.7, 69.5, 56.2, 43.2, 29.6, 29.1, 28.9, 28.7, 26.4, 25.7, 21.5; **HRMS** (ESI):  $m/z$ : calculated for  $\text{C}_{23}\text{H}_{31}\text{BrNO}_5\text{S}$ :  $[\text{M} + \text{H}]^+$  512.1101, found: 512.1120.

## Reaction Condition Optimization

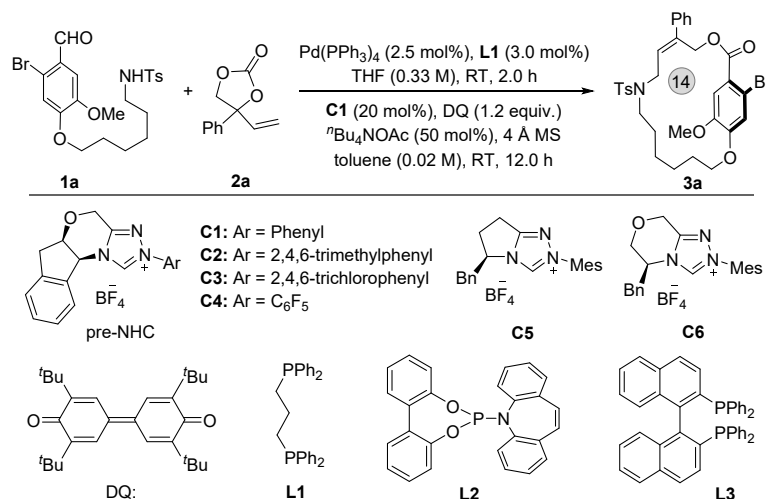

| Entry <sup>[a]</sup> | Variation of standard conditions            | Yield (%) <sup>[b]</sup> | ee (%) <sup>[c]</sup> |
|----------------------|---------------------------------------------|--------------------------|-----------------------|
| 1                    | none                                        | 72                       | 96                    |
| 2                    | <b>C2</b> instead of <b>C1</b>              | 65                       | 30                    |
| 3                    | <b>C3</b> or <b>C4</b> instead of <b>C1</b> | < 5                      | -                     |
| 4                    | <b>C5</b> instead of <b>C1</b>              | 30                       | -16                   |
| 5                    | <b>C6</b> instead of <b>C1</b>              | 46                       | -22                   |

|    |                                                                             |    |    |
|----|-----------------------------------------------------------------------------|----|----|
| 6  | <b>L2</b> instead of <b>L1</b>                                              | 60 | 96 |
| 7  | <b>L3</b> instead of <b>L1</b>                                              | 65 | 96 |
| 8  | without of <b>L1</b>                                                        | 68 | 96 |
| 9  | K <sub>2</sub> CO <sub>3</sub> instead of <sup>n</sup> Bu <sub>4</sub> NOAc | 28 | 94 |
| 10 | KOAc instead of <sup>n</sup> Bu <sub>4</sub> NOAc                           | 35 | 96 |
| 11 | Et <sub>3</sub> N instead of <sup>n</sup> Bu <sub>4</sub> NOAc              | 30 | 92 |
| 12 | THF instead of toluene                                                      | 52 | 90 |
| 13 | CH <sub>2</sub> Cl <sub>2</sub> instead of toluene                          | 68 | 93 |
| 14 | without 4 Å MS                                                              | 67 | 96 |
| 15 | toluene (0.1 M) was used                                                    | 62 | 96 |

[a] Conditions: **1a** (0.10 mmol), **2a** (0.15 mmol), Pd(PPh<sub>3</sub>)<sub>4</sub> (2.5 mol%) and **L1** (3.0 mol%) in 0.3 mL of THF were allowed to stir at room temperature for 2 h. The solution was then transferred into a mixture of pre-NHC catalyst **C1** (20 mol%), <sup>n</sup>Bu<sub>4</sub>NOAc (50 mol%), DQ (0.12 mmol) and 4 Å MS 50 mg in toluene (5.0 mL). The reaction mixture was allowed to stir at room temperature for another 12 h under Ar. [b] Isolated yield after flash column chromatography. [c] Determined by HPLC analysis using a chiral stationary phase.

## General Procedure for Atroposelective Intermolecular Macrocyclization

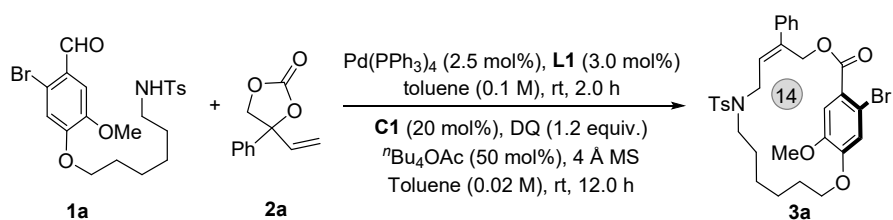

To a flame-dried Schlenk reaction tube equipped with a magnetic stir bar, was added the catalyst Pd(PPh<sub>3</sub>)<sub>4</sub> (2.9 mg, 0.025 mmol), **L1** (1.3 mg, 0.03 mmol), toluene (1.0 mL) was added. The mixture was then stirred at room temperature for 0.5 h. After that, **1a** (48.4 mg, 0.1 mmol) and **2a** (28.5 mg, 0.15 mmol) were added sequentially under Ar. The reaction mixture was then stirred at room temperature for 2 h. Then the solution was transferred into a mixture of pre-NHC catalyst **C1** (20 mol%), <sup>n</sup>Bu<sub>4</sub>NOAc (50 mol%), DQ (0.12 mmol) and 4 Å MS 50 mg in toluene (4.0 mL) and stirred at room temperature for another 12 h (monitored by TLC). After the reaction was completed, the reaction mixture was filtered and concentrated. The residue was purified by a silica gel flash chromatography (Hexane/EtOAc = 5:1) to

afford the desired product **3a** in 72% yield with 96% ee.

**Note:** Racemic samples for the standard of chiral HPLC spectra were prepared using **C7** as catalyst.

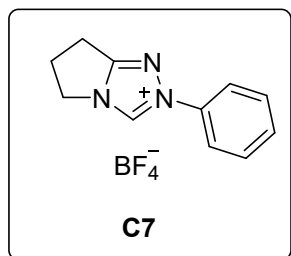

### Characterization Data of Planar Chiral Products

**(*R<sub>p</sub>*,*Z*)-1<sup>5</sup>-bromo-1<sup>2</sup>-methoxy-1<sup>2</sup>-phenyl-9-tosyl-2,14-dioxa-9-aza-1(1,4)-benzenacyclopentadecaphan-11-en-15-one (3a)**

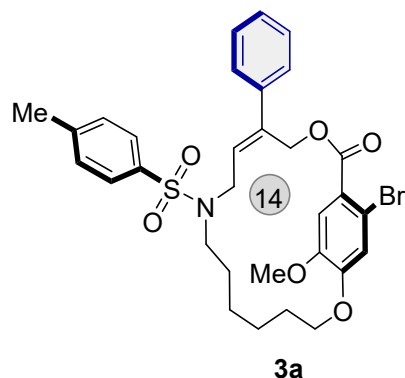

Following the general procedure, the crude product was purified by column chromatography on a silica gel to afford the product **3a** (45.2 mg, 72% yield) as colorless oil.  $R_f$  (pentane:EtOAc = 4:1) = 0.30;  $^1\text{H NMR}$  (400 MHz, Chloroform-*d*)  $\delta$  7.72 (d,  $J$  = 8.0 Hz, 2H), 7.39 – 7.28 (m, 8H), 7.25 (s, 1H), 5.68 (t,  $J$  = 5.9 Hz, 1H), 5.20 (d,  $J$  = 13.2 Hz, 1H), 5.10 (d,  $J$  = 13.2 Hz, 1H), 4.45 – 4.28 (m, 2H), 4.03 (qd,  $J$  = 17.6, 5.9 Hz, 2H), 3.89 (s, 3H), 3.05 (ddd,  $J$  = 14.6, 10.3, 4.9 Hz, 1H), 2.87 (ddd,  $J$  = 14.5, 10.8, 4.3 Hz, 1H), 2.46 (s, 3H), 1.83 – 1.68 (m, 1H), 1.68 – 1.49 (m, 1H), 1.26 – 1.13 (m, 1H), 1.12 – 0.98 (m, 1H), 0.96 – 0.67 (m, 4H).  $^{13}\text{C NMR}$  (100 MHz, Chloroform-*d*)  $\delta$  165.9, 151.8, 150.4, 143.2, 140.4, 137.9, 136.6, 131.3, 129.7, 128.5, 127.8, 127.2, 126.3, 126.3, 124.8, 114.3, 111.9, 70.6, 63.5, 56.3, 48.3, 46.2, 29.4, 29.1,

25.2, 25.0, 21.5; **HRMS** (ESI):  $m/z$ : calculated for  $C_{21}H_{35}BrNO_6S$ :  $[M + H]^+$  628.1363, found: 628.1369; HPLC (Chiralpak IF, *i*-propanol/hexane = 38/42, flow rate 0.8 mL/min,  $\lambda = 254$  nm):  $t_R$  (major) = 26.2 min,  $t_R$  (minor) = 20.3 min, 96% ee;  $[\alpha]^{25}_D = -63.8$  ( $c = 0.2$ ,  $CHCl_3$ ).

**(*R*<sub>p</sub>,*Z*)-1<sup>5</sup>-bromo-1<sup>2</sup>-methoxy-9-tosyl-12-(4-(trifluoromethyl)phenyl)-2,14-dioxa-9-aza-1(1,4)-benzenacyclopentadecaphan-11-en-15-one (3b)**

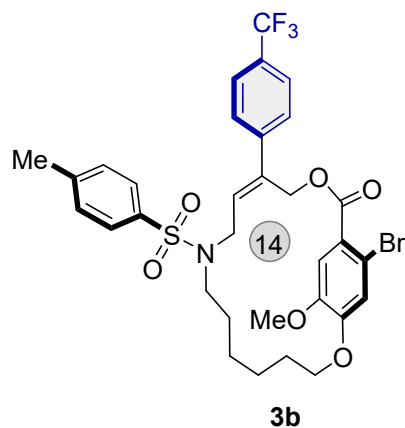

Following the general procedure, the crude product was purified by column chromatography on a silica gel to afford the product **3b** (49.3 mg, 71% yield) as colorless oil.  $R_f$  (pentane:EtOAc = 4:1) = 0.28; **<sup>1</sup>H NMR** (400 MHz, Chloroform-*d*)  $\delta$  7.72 (d,  $J = 8.1$  Hz, 2H), 7.61 (d,  $J = 8.1$  Hz, 2H), 7.51 (d,  $J = 8.2$  Hz, 2H), 7.36 – 7.30 (m, 3H), 7.26 (s, 1H), 5.81 (t,  $J = 5.8$  Hz, 1H), 5.20 (d,  $J = 13.3$  Hz, 1H), 5.10 (d,  $J = 13.3$  Hz, 1H), 4.42 – 4.33 (m, 2H), 4.12 – 3.93 (m, 2H), 3.89 (s, 3H), 3.07 (ddd,  $J = 15.1, 10.7, 5.4$  Hz, 1H), 2.85 (ddd,  $J = 14.5, 11.4, 3.9$  Hz, 1H), 2.46 (s, 3H), 1.84 – 1.72 (m, 1H), 1.58 (q,  $J = 6.0, 5.2$  Hz, 1H), 1.27 – 1.15 (m, 1H), 1.10 – 0.98 (m, 1H), 0.94 – 0.74 (m, 4H). **<sup>13</sup>C NMR** (100 MHz, Chloroform-*d*)  $\delta$  165.8, 151.9, 150.4, 143.9, 143.4, 137.6, 135.6, 133.8, 129.8, 127.2, 126.7, 125.8, 125.5 (q,  $J = 3.8$  Hz), 124.7, 114.4, 112.0, 70.5, 63.1, 56.3, 48.6, 46.2, 29.3, 29.0, 25.1, 25.0, 21.5. **<sup>19</sup>F NMR** (376 MHz, Chloroform-*d*)  $\delta$  -62.57; **HRMS** (ESI):  $m/z$ : calculated for  $C_{32}H_{34}BrF_3NO_6S$ :  $[M + H]^+$  696.1237, found: 696.1244; HPLC (Chiralpak IF, *i*-propanol/hexane = 38/42, flow rate 0.8 mL/min,  $\lambda = 254$  nm):  $t_R$  (major) = 21.8 min,  $t_R$  (minor) = 15.9 min, 98% ee;  $[\alpha]^{25}_D = -72.5$  ( $c = 0.2$ ,  $CHCl_3$ ).

**(*R*<sub>p</sub>,*Z*)-1<sup>5</sup>-bromo-1<sup>2</sup>-(4-fluorophenyl)-12-methoxy-9-tosyl-2,14-dioxa-9-aza-1(1,4)-**

**benzenacyclopentadecaphan-11-en-15-one (3c)**

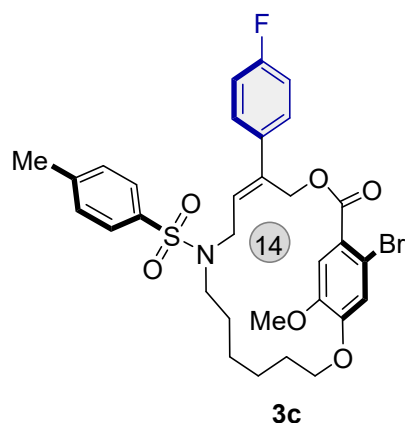

Following the general procedure, the crude product was purified by column chromatography on a silica gel to afford the product **3c** (45.3 mg, 70% yield) as colorless oil.  $R_f$  (pentane:EtOAc = 4:1) = 0.30;  $^1\text{H NMR}$  (400 MHz, Chloroform-*d*)  $\delta$  7.72 (d,  $J = 8.3$  Hz, 2H), 7.40 – 7.30 (m, 5H), 7.26 (s, 1H), 7.03 (t,  $J = 8.7$  Hz, 2H), 5.65 (t,  $J = 5.8$  Hz, 1H), 5.17 (d,  $J = 13.3$  Hz, 1H), 5.06 (d,  $J = 13.3$  Hz, 1H), 4.42 – 4.34 (m, 2H), 4.13 – 3.90 (m, 2H), 3.89 (s, 3H), 3.13 – 2.96 (m, 1H), 2.86 (ddd,  $J = 14.5, 11.0, 4.1$  Hz, 1H), 2.46 (s, 3H), 1.86 – 1.70 (m, 1H), 1.66 – 1.50 (m, 1H), 1.30 – 1.17 (m, 1H), 1.15 – 0.99 (m, 1H), 0.96 – 0.74 (m, 4H).  $^{13}\text{C NMR}$  (100 MHz, Chloroform-*d*)  $\delta$  165.8, 162.5 (d,  $J = 247.3$  Hz), 151.8, 150.37, 143.3, 137.8, 136.5 (d,  $J = 3.3$  Hz), 135.7, 131.3, 129.7, 128.2, 128.1, 127.2, 126.0, 124.8, 115.5, 115.3, 114.4, 112.0, 70.6, 63.5, 56.3, 48.4, 46.2, 29.3, 29.0, 25.1, 25.0, 21.5.  $^{19}\text{F NMR}$  (376 MHz, Chloroform-*d*)  $\delta$  -114.33; **HRMS** (ESI):  $m/z$ : calculated for  $\text{C}_{31}\text{H}_{34}\text{BrFNO}_6\text{S}$ :  $[\text{M} + \text{H}]^+$  646.1269, found: 646.1274; HPLC (Chiralpak IF, *i*-propanol/hexane = 38/42, flow rate 0.8 mL/min,  $\lambda = 254$  nm):  $t_R$  (major) = 21.8 min,  $t_R$  (minor) = 16.9 min, 99% ee;  $[\alpha]_D^{25} = -61.8$  ( $c = 0.2$ ,  $\text{CHCl}_3$ ).

**( $R_p, Z$ )-1<sup>5</sup>-bromo-1<sup>2</sup>-(4-chlorophenyl)-12-methoxy-9-tosyl-2,14-dioxa-9-aza-1(1,4)-benzenacyclopentadecaphan-11-en-15-one (3d)**



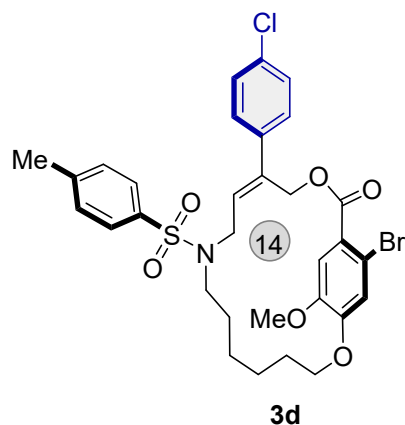

Following the general procedure, the crude product was purified by column chromatography on a silica gel to afford the product **3d** (47.6 mg, 72% yield) as colorless oil.  $R_f$  (pentane:EtOAc = 4:1) = 0.30;  $^1\text{H NMR}$  (400 MHz, Chloroform-*d*)  $\delta$  7.71 (d,  $J$  = 8.3 Hz, 2H), 7.35 – 7.30 (m, 7H), 7.25 (s, 1H), 5.70 (t,  $J$  = 5.8 Hz, 1H), 5.16 (d,  $J$  = 13.2 Hz, 1H), 5.06 (d,  $J$  = 13.2 Hz, 1H), 4.37 (q,  $J$  = 4.3, 3.2 Hz, 2H), 4.09 – 3.91 (m, 2H), 3.89 (s, 3H), 3.05 (ddd,  $J$  = 14.6, 10.6, 5.4 Hz, 1H), 2.91 – 2.79 (m, 1H), 2.46 (s, 3H), 1.77 (dt,  $J$  = 13.7, 6.2 Hz, 1H), 1.59 (d,  $J$  = 8.5 Hz, 1H), 1.23 (t,  $J$  = 13.8 Hz, 1H), 1.10 – 0.98 (m, 1H), 0.95 – 0.70 (m, 4H).  $^{13}\text{C NMR}$  (100 MHz, Chloroform-*d*)  $\delta$  165.8, 151.8, 150.4, 143.3, 138.8, 137.7, 135.6, 133.8, 132.0, 129.7, 128.7, 127.7, 127.2, 126.0, 124.7, 114.4, 112.0, 70.6, 63.3, 56.3, 48.4, 46.2, 29.3, 29.0, 25.1, 25.0, 21.5; **HRMS** (ESI):  $m/z$ : calculated for  $\text{C}_{31}\text{H}_{34}\text{BrClINO}_6\text{S}$ :  $[\text{M} + \text{H}]^+$  662.0974, found: 626.0982; HPLC (Chiralpak IF, *i*-propanol/hexane = 38/42, flow rate 0.8 mL/min,  $\lambda$  = 254 nm):  $t_R$  (major) = 25.5 min,  $t_R$  (minor) = 18.8 min, 98% ee;  $[\alpha]_D^{25} = -43.1$  ( $c$  = 0.1,  $\text{CHCl}_3$ ).

**( $R_p, Z$ )-1<sup>5</sup>-bromo-1<sup>2</sup>-(4-bromophenyl)-12-methoxy-9-tosyl-2,14-dioxa-9-aza-1(1,4)-benzenacyclopentadecaphan-11-en-15-one (3e)**

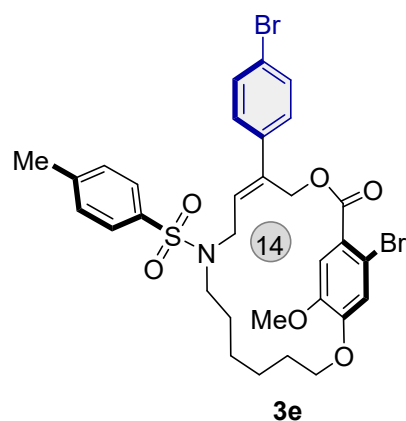

Following the general procedure, the crude product was purified by column chromatography on a silica gel to afford the product **3e** (51.8 mg, 73% yield) as colorless oil.  $R_f$  (pentane:EtOAc = 4:1) = 0.30;  $^1\text{H NMR}$  (400 MHz, Chloroform-*d*)  $\delta$  7.71 (d,  $J = 8.2$  Hz, 2H), 7.49 – 7.44 (m, 2H), 7.33 (d,  $J = 8.1$  Hz, 2H), 7.30 (s, 1H), 7.27 (s, 1H), 7.25 (s, 2H), 5.70 (t,  $J = 5.8$  Hz, 1H), 5.16 (d,  $J = 13.3$  Hz, 1H), 5.05 (d,  $J = 13.2$  Hz, 1H), 4.42 – 4.32 (m, 2H), 4.09 – 3.90 (m, 2H), 3.89 (s, 3H), 3.10 – 2.98 (m, 1H), 2.84 (ddd,  $J = 14.5, 11.0, 4.0$  Hz, 1H), 2.46 (s, 3H), 1.84 – 1.71 (m, 1H), 1.61 – 1.51 (m, 1H), 1.27 – 1.15 (m, 1H), 1.07 – 0.98 (m, 1H), 0.92 – 0.72 (m, 4H).  $^{13}\text{C NMR}$  (100 MHz, Chloroform-*d*)  $\delta$  165.8, 151.9, 150.4, 143.3, 139.3, 137.7, 135.7, 132.1, 131.6, 129.7, 128.0, 127.2, 125.9, 124.7, 121.9, 114.4, 112.0, 70.6, 63.2, 56.3, 48.5, 46.2, 29.3, 29.0, 25.1, 25.0, 21.5; **HRMS** (ESI):  $m/z$ : calculated for  $\text{C}_{31}\text{H}_{34}\text{Br}_2\text{NO}_6\text{S}$ :  $[\text{M} + \text{H}]^+$  708.0448, found: 708.0455; HPLC (Chiralpak IF, *i*-propanol/hexane = 38/42, flow rate 0.8 mL/min,  $\lambda = 254$  nm):  $t_R$  (major) = 30.5 min,  $t_R$  (minor) = 22.1 min, 98% ee;  $[\alpha]^{25}_D = -70.6$  ( $c = 0.2$ ,  $\text{CHCl}_3$ ).

**(*R\_p, Z*)methyl-4-(1<sup>5</sup>-bromo-1<sup>2</sup>-methoxy-15-oxo-9-tosyl-2,14-dioxa-9-aza-1(1,4)-benzenacyclopentadecaphan-11-en-12-yl)benzoate (3f)**

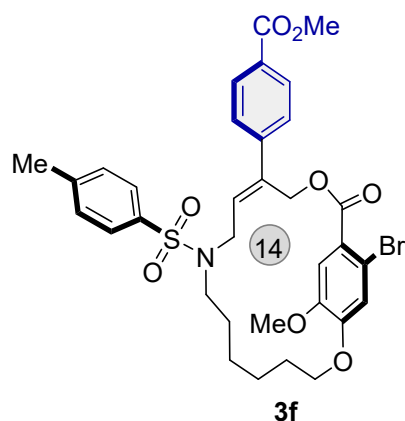

Following the general procedure, the crude product was purified by column chromatography on a silica gel to afford the product **3f** (48.2 mg, 70% yield) as colorless oil.  $R_f$  (pentane:EtOAc = 4:1) = 0.30;  $^1\text{H NMR}$  (400 MHz, Chloroform-*d*)  $\delta$  8.01 (d,  $J = 8.4$  Hz, 2H), 7.72 (d,  $J = 8.3$  Hz, 2H), 7.45 (d,  $J = 8.5$  Hz, 2H), 7.33 (d,  $J = 8.0$  Hz, 2H), 7.30 (s, 1H), 7.26 (s, 1H), 5.81 (t,  $J = 5.8$  Hz, 1H), 5.20 (d,  $J = 13.2$  Hz, 1H), 5.10 (d,  $J = 13.2$  Hz, 1H), 4.37 (t,  $J = 5.0$  Hz, 2H), 4.12 – 3.98 (m, 2H), 3.95 (s, 3H), 3.89 (s, 3H), 3.07 (ddd,  $J = 14.6, 5.8$  Hz, 1H), 2.86 (ddd,  $J = 14.6, 11.1, 3.9$  Hz, 1H), 2.46 (s, 3H), 1.83 – 1.71 (m, 1H), 1.64 – 1.53 (m, 1H), 1.25 – 1.17 (m, 1H), 1.10 – 0.98 (m, 1H), 0.94 – 0.72 (m, 4H).  $^{13}\text{C NMR}$  (100 MHz, Chloroform-*d*)  $\delta$  166.7, 165.8, 151.9, 150.4, 144.7, 143.4, 137.7, 135.9, 133.5, 129.9, 129.8, 129.4, 127.2, 126.3, 125.9, 124.7, 114.4, 112.0, 70.6, 63.1, 56.3, 52.2, 48.5, 46.2, 29.3, 29.1, 25.1, 25.0, 21.5; **HRMS** (ESI):  $m/z$ : calculated for  $\text{C}_{33}\text{H}_{37}\text{BrNO}_8\text{S}$ :  $[\text{M} + \text{H}]^+$  686.1418, found: 686.1412; HPLC (Chiralpak IF, *i*-propanol/hexane = 38/42, flow rate 0.8 mL/min,  $\lambda = 254$  nm):  $t_R$  (major) = 46.5 min,  $t_R$  (minor) = 35.0 min, 98% ee;  $[\alpha]_D^{25} = -57.3$  ( $c = 0.2$ ,  $\text{CHCl}_3$ ).

**(*R\_p, Z*)-12-([1,1'-biphenyl]-4-yl)-1<sup>5</sup>-bromo-1<sup>2</sup>-methoxy-9-tosyl-2,14-dioxa-9-aza-1(1,4)-benzenacyclotetradecaphan-11-en-15-one (3g)**

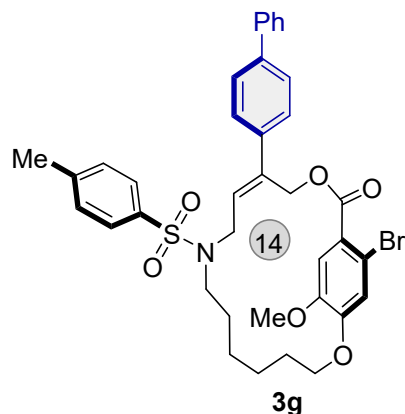

Following the general procedure, the crude product was purified by column chromatography on a silica gel to afford the product **3g** (48.7 mg, 69% yield) as colorless oil.  $R_f$  (pentane:EtOAc = 4:1) = 0.30;  $^1\text{H NMR}$  (400 MHz, Chloroform-*d*)  $\delta$  7.74 (d,  $J$  = 8.3 Hz, 2H), 7.61 (ddd,  $J$  = 11.0, 7.7, 1.7 Hz, 4H), 7.52 – 7.43 (m, 4H), 7.43 – 7.29 (m, 4H), 7.27 (s, 1H), 5.76 (t,  $J$  = 5.9 Hz, 1H), 5.24 (d,  $J$  = 13.2 Hz, 1H), 5.14 (d,  $J$  = 13.2 Hz, 1H), 4.37 (q,  $J$  = 4.6, 3.9 Hz, 2H), 4.06 (qd,  $J$  = 17.6, 5.9 Hz, 2H), 3.90 (s, 3H), 3.07 (ddd,  $J$  = 14.5, 11.0, 4.8 Hz, 1H), 2.88 (ddd,  $J$  = 14.5, 10.9, 4.3 Hz, 1H), 2.47 (s, 3H), 1.91 – 1.70 (m, 1H), 1.59 (s, 1H), 1.34 – 1.16 (m, 1H), 1.13 – 1.01 (m, 1H), 0.97 – 0.74 (m, 4H).  $^{13}\text{C NMR}$  (100 MHz, Chloroform-*d*)  $\delta$  165.9, 151.8, 150.4, 143.3, 140.7, 140.5, 139.2, 137.9, 136.2, 131.3, 129.7, 128.8, 127.5, 127.23, 127.19, 127.0, 126.7, 126.3, 124.9, 114.4, 111.9, 70.64, 63.4, 56.3, 48.3, 46.2, 29.4, 29.2, 25.2, 25.0, 21.5; **HRMS** (ESI):  $m/z$ : calculated for  $\text{C}_{37}\text{H}_{39}\text{BrNO}_6\text{S}$ :  $[\text{M} + \text{H}]^+$  704.1676, found: 704.1681; HPLC (Chiralpak IF, *i*-propanol/hexane = 38/42, flow rate 0.8 mL/min,  $\lambda$  = 254 nm):  $t_R$  (major) = 38.5 min,  $t_R$  (minor) = 28.1 min, 98% ee;  $[\alpha]_D^{25}$  = - 70.5 ( $c$  = 0.2,  $\text{CHCl}_3$ ).

**(*R\_p*,*Z*)-1<sup>5</sup>-bromo-1<sup>2</sup>-methoxy-12-(4-methoxyphenyl)-9-tosyl-2,14-dioxa-9-aza-1(1,4)-benzenacyclopentadecaphan-11-en-15-one (3h)**

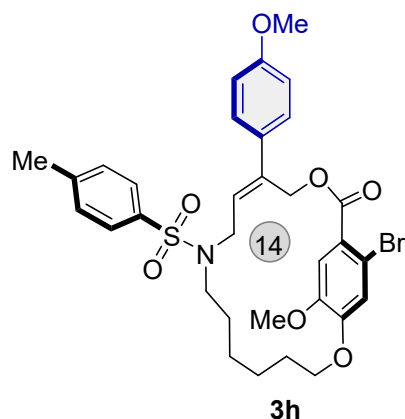

Following the general procedure, the crude product was purified by column chromatography on a silica gel to afford the product **3h** (45.2 mg, 68% yield) as colorless oil.  $R_f$  (pentane:EtOAc = 4:1) = 0.25;  $^1\text{H NMR}$  (400 MHz, Chloroform-*d*)  $\delta$  7.72 (d,  $J = 8.3$  Hz, 2H), 7.35 – 7.29 (m, 5H), 7.24 (s, 1H), 6.88 (d,  $J = 8.8$  Hz, 2H), 5.58 (t,  $J = 5.9$  Hz, 1H), 5.23 – 4.98 (m, 2H), 4.36 (q,  $J = 4.6, 4.1$  Hz, 2H), 4.12 – 3.92 (m, 2H), 3.88 (s, 3H), 3.84 (s, 3H), 3.04 (ddd,  $J = 14.8, 10.6, 4.9$  Hz, 1H), 2.86 (ddd,  $J = 14.6, 10.9, 4.5$  Hz, 1H), 2.46 (s, 3H), 1.82 – 1.66 (m, 1H), 1.59 (ddd,  $J = 14.5, 7.5, 3.6$  Hz, 1H), 1.27 – 1.15 (m, 1H), 1.12 – 0.98 (m, 1H), 0.96 – 0.71 (m, 4H).  $^{13}\text{C NMR}$  (100 MHz, Chloroform-*d*)  $\delta$  166.0, 159.4, 151.7, 150.4, 143.2, 137.9, 136.1, 132.8, 129.7, 129.5, 127.6, 127.2, 126.4, 124.8, 114.3, 113.9, 111.9, 70.7, 63.5, 56.3, 55.3, 48.2, 46.2, 29.4, 29.2, 25.2, 25.0, 21.5; **HRMS** (ESI):  $m/z$ : calculated for  $\text{C}_{32}\text{H}_{37}\text{BrNO}_7\text{S}$ :  $[\text{M} + \text{H}]^+$  658.1469, found: 658.1477; HPLC (Chiralpak IF, *i*-propanol/hexane = 38/42, flow rate 0.8 mL/min,  $\lambda = 254$  nm):  $t_R$  (major) = 33.7 min,  $t_R$  (minor) = 26.6 min, 97% ee;  $[\alpha]_D^{25} = -33.9$  ( $c = 0.1$ ,  $\text{CHCl}_3$ ).

**(*R\_p, Z*)-1<sup>5</sup>-bromo-1<sup>2</sup>-methoxy-12-(*p*-tolyl)-9-tosyl-2,14-dioxa-9-aza-1(1,4)-benzenacyclopentadecaphan-11-en-15-one (3i)**

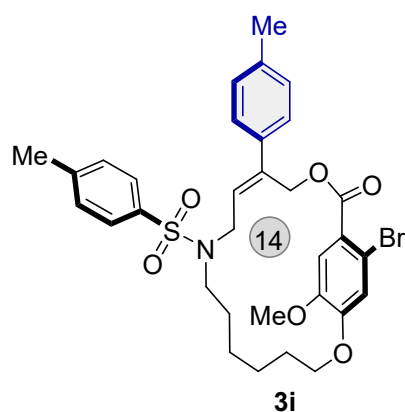

Following the general procedure, the crude product was purified by column chromatography on a silica gel to afford the product **3i** (44.1 mg, 69% yield) as colorless oil.  $R_f$  (pentane:EtOAc = 4:1) = 0.30;  $^1\text{H NMR}$  (400 MHz, Chloroform-*d*)  $\delta$  7.72 (d,  $J$  = 8.3 Hz, 2H), 7.35 – 7.30 (m, 3H), 7.28 (s, 1H), 7.25 (d,  $J$  = 5.7 Hz, 2H), 7.15 (d,  $J$  = 7.9 Hz, 2H), 5.63 (t,  $J$  = 6.0 Hz, 1H), 5.18 (d,  $J$  = 13.1 Hz, 1H), 5.08 (d,  $J$  = 13.1 Hz, 1H), 4.36 (dt,  $J$  = 7.9, 4.1 Hz, 2H), 4.11 – 3.93 (m, 2H), 3.89 (s, 3H), 3.04 (ddd,  $J$  = 14.7, 10.5, 4.9 Hz, 1H), 2.86 (ddd,  $J$  = 14.5, 10.8, 4.4 Hz, 1H), 2.46 (s, 3H), 2.37 (s, 3H), 1.84 – 1.69 (m, 1H), 1.59 (q,  $J$  = 6.6 Hz, 1H), 1.27 – 1.15 (m, 1H), 1.12 – 0.98 (m, 1H), 0.94 – 0.73 (m, 4H).  $^{13}\text{C NMR}$  (100 MHz, Chloroform-*d*)  $\delta$  166.0, 151.7, 150.4, 143.2, 137.9, 137.7, 137.5, 136.4, 130.4, 129.7, 129.2, 127.2, 126.4, 126.2, 124.9, 114.3, 111.9, 70.7, 63.5, 56.3, 48.2, 46.1, 29.41, 29.2, 25.2, 25.0, 21.5, 21.1; **HRMS** (ESI):  $m/z$ : calculated for  $\text{C}_{32}\text{H}_{37}\text{BrNO}_6\text{S}$ :  $[\text{M} + \text{H}]^+$  642.1520, found: 642.1514; HPLC (Chiralpak IF, *i*-propanol/hexane = 38/42, flow rate 0.8 mL/min,  $\lambda$  = 254 nm):  $t_R$  (major) = 22.9 min,  $t_R$  (minor) = 18.2 min, 97% ee;  $[\alpha]_D^{25}$  = - 58.7 ( $c$  = 0.2,  $\text{CHCl}_3$ ).

**(*R\_p, Z*)-1<sup>5</sup>-bromo-12-(3,4-dichlorophenyl)-1<sup>2</sup>-methoxy-9-tosyl-2,14-dioxa-9-aza-1(1,4)-benzenacyclopentadecaphan-11-en-15-one (3j)**

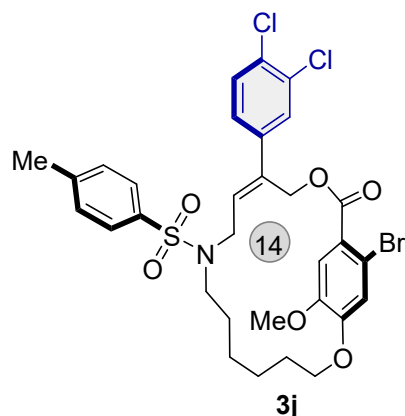

Following the general procedure, the crude product was purified by column chromatography on a silica gel to afford the product **3j** (50.3 mg, 72% yield) as colorless oil.  $R_f$  (pentane:EtOAc = 4:1) = 0.30;  $^1\text{H NMR}$  (400 MHz, Chloroform-*d*)  $\delta$  7.72 (d,  $J$  = 8.2 Hz, 2H), 7.34 (d,  $J$  = 8.0 Hz, 2H), 7.30 (s, 1H), 7.22 (s, 1H), 7.20 (dd,  $J$  = 5.2, 1.1 Hz, 1H), 7.15 (dd,  $J$  = 3.7, 1.1 Hz, 1H), 7.01 (dd,  $J$  = 5.1, 3.7 Hz, 1H), 5.75 (t,  $J$  = 6.1 Hz, 1H), 5.22 (d,  $J$  = 13.2 Hz, 1H), 5.11 (d,  $J$  = 13.2 Hz, 1H), 4.46 – 4.32 (m, 2H), 4.05 (dd,  $J$  = 6.1, 1.8 Hz, 2H), 3.88 (s, 3H), 3.00 (ddd,  $J$  = 14.1, 11.1, 5.0 Hz, 1H), 2.87 (ddd,  $J$  = 14.1, 10.9, 5.2 Hz, 1H), 2.46 (s, 3H), 1.74 (dt,  $J$  = 13.0, 7.5 Hz, 1H), 1.61 (ddd,  $J$  = 14.0, 7.4, 3.6 Hz, 1H), 1.22 (dt,  $J$  = 14.5, 7.1 Hz, 1H), 1.13 – 1.00 (m, 1H), 0.90 (dt,  $J$  = 14.0, 6.6 Hz, 2H), 0.84 – 0.71 (m, 2H).  $^{13}\text{C NMR}$  (100 MHz, Chloroform-*d*)  $\delta$  165.8, 151.8, 150.4, 143.6, 143.3, 137.8, 130.5, 129.8, 128.8, 127.7, 127.1, 126.3, 124.9, 124.9, 124.1, 114.3, 111.8, 70.7, 62.8, 56.3, 48.3, 45.9, 29.4, 29.3, 25.3, 25.0, 21.5; **HRMS** (ESI):  $m/z$ : calculated for  $\text{C}_{31}\text{H}_{33}\text{BrCl}_2\text{NO}_6\text{S}$ :  $[\text{M} + \text{H}]^+$  696.0584, found: 696.0593; HPLC (Chiralpak IF, *i*-propanol/hexane = 38/42, flow rate 0.8 mL/min,  $\lambda$  = 254 nm):  $t_R$  (major) = 29.2 min,  $t_R$  (minor) = 19.1 min, >99% ee;  $[\alpha]_D^{25}$  = - 69.6 ( $c$  = 0.2,  $\text{CHCl}_3$ ).

**(*R\_p, Z*)-1<sup>5</sup>-bromo-12-(3-bromophenyl)-1<sup>2</sup>-methoxy-9-tosyl-2,14-dioxa-9-aza-1(1,4)-benzenacyclopentadecaphan-11-en-15-one (3k)**

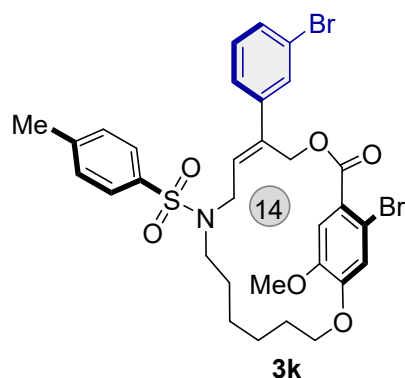

Following the general procedure, the crude product was purified by column chromatography on a silica gel to afford the product **3k** (49.8 mg, 71% yield) as colorless oil.  $R_f$  (pentane:EtOAc = 4:1) = 0.30;  $^1\text{H NMR}$  (400 MHz, Chloroform-*d*)  $\delta$  7.72 (d,  $J = 8.3$  Hz, 2H), 7.47 – 7.40 (m, 2H), 7.36 (t,  $J = 8.3$  Hz, 3H), 7.31 (s, 1H), 7.27 (s, 1H), 7.23 (t,  $J = 8.1$  Hz, 1H), 5.64 (t,  $J = 5.8$  Hz, 1H), 5.15 (d,  $J = 13.3$  Hz, 1H), 5.05 (d,  $J = 13.3$  Hz, 1H), 4.42 – 4.33 (m, 2H), 4.13 – 3.92 (m, 2H), 3.90 (s, 3H), 3.04 (ddd,  $J = 14.5, 10.2, 5.1$  Hz, 1H), 2.92 – 2.79 (m, 1H), 2.47 (s, 3H), 1.86 – 1.71 (m, 1H), 1.64 – 1.57 (m, 1H), 1.30 – 1.17 (m, 1H), 1.12 – 1.00 (m, 1H), 0.96 – 0.71 (m, 4H).  $^{13}\text{C NMR}$  (100 MHz, Chloroform-*d*)  $\delta$  165.8, 151.8, 150.4, 143.4, 142.4, 137.8, 135.6, 132.4, 130.8, 130.0, 129.8, 129.4, 127.1, 125.9, 124.97, 124.8, 122.7, 114.4, 112.0, 70.6, 63.2, 56.3, 48.4, 46.1, 29.2, 29.1, 25.1, 25.0, 21.6; **HRMS** (ESI):  $m/z$ : calculated for  $\text{C}_{31}\text{H}_{33}\text{Br}_2\text{NO}_6\text{S}$ :  $[\text{M} + \text{H}]^+$  707.0375, found: 707.0381; HPLC (Chiralpak IF, *i*-propanol/hexane = 38/42, flow rate 0.8 mL/min,  $\lambda = 254$  nm):  $t_R$  (major) = 24.7 min,  $t_R$  (minor) = 17.9 min, 97% ee;  $[\alpha]_D^{25} = -51.8$  ( $c = 0.2, \text{CHCl}_3$ ).

**(*R\_p, Z*)-1<sup>5</sup>-bromo-1<sup>2</sup>-methoxy-12-(3-methoxyphenyl)-9-tosyl-2,14-dioxa-9-aza-1(1,4)-benzenacyclopentadecaphan-11-en-15-one (3l)**

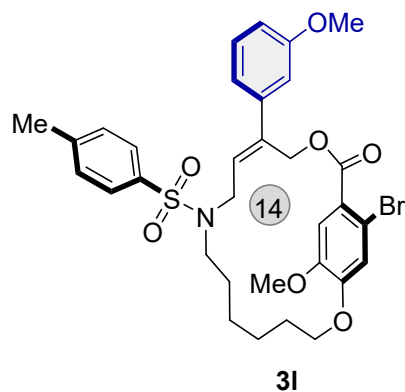



Following the general procedure, the crude product was purified by column chromatography on a silica gel to afford the product **3l** (43.8 mg, 67% yield) as colorless oil.  $R_f$  (pentane:EtOAc = 4:1) = 0.25;  $^1\text{H NMR}$  (400 MHz, Chloroform-*d*)  $\delta$  7.72 (d,  $J$  = 8.3 Hz, 2H), 7.35 – 7.30 (m, 3H), 7.29 – 7.23 (m, 2H), 6.97 (dt,  $J$  = 7.9, 1.1 Hz, 1H), 6.91 (t,  $J$  = 2.1 Hz, 1H), 6.88 – 6.82 (m, 1H), 5.80 – 5.59 (m, 1H), 5.18 (d,  $J$  = 13.1 Hz, 1H), 5.08 (d,  $J$  = 13.1 Hz, 1H), 4.37 (dt,  $J$  = 8.1, 4.1 Hz, 2H), 4.14 – 3.94 (m, 2H), 3.89 (s, 3H), 3.84 (s, 3H), 3.12 – 3.00 (m, 1H), 2.86 (ddd,  $J$  = 14.5, 10.8, 4.3 Hz, 1H), 2.45 (s, 3H), 1.87 – 1.71 (m, 1H), 1.65 – 1.51 (m, 1H), 1.27 – 1.15 (m, 1H), 1.07 (dd,  $J$  = 10.6, 5.9 Hz, 1H), 0.92 – 0.71 (m, 4H).  $^{13}\text{C NMR}$  (100 MHz, Chloroform-*d*)  $\delta$  165.9, 159.7, 151.8, 150.4, 143.3, 141.9, 137.9, 136.6, 131.4, 129.7, 129.5, 127.1, 126.3, 124.9, 118.8, 114.3, 113.2, 112.1, 111.9, 70.7, 63.5, 56.3, 55.3, 48.2, 46.1, 29.4, 29.2, 25.2, 25.0, 21.5; **HRMS** (ESI):  $m/z$ : calculated for  $\text{C}_{32}\text{H}_{37}\text{BrNO}_7\text{S}$ :  $[\text{M} + \text{H}]^+$  658.1469, found: 658.1462; HPLC (Chiralpak IF, *i*-propanol/hexane = 38/42, flow rate 0.8 mL/min,  $\lambda$  = 254 nm):  $t_R$  (major) = 28.2 min,  $t_R$  (minor) = 21.7 min, 96% ee;  $[\alpha]_D^{25}$  = - 70.1 ( $c$  = 0.2,  $\text{CHCl}_3$ ).

**(*R\_p,Z*)-1<sup>5</sup>-bromo-1<sup>2</sup>-methoxy-12-(naphthalen-2-yl)-9-tosyl-2,14-dioxa-9-aza-1(1,4)-benzenacyclopentadecaphan-11-en-15-one (3m)**

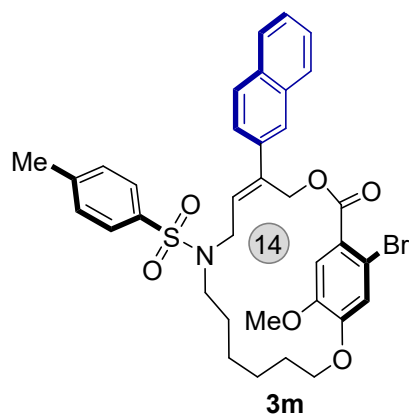

Following the general procedure, the crude product was purified by column chromatography on a silica gel to afford the product **3m** (49.8 mg, 71% yield) as colorless oil.  $R_f$  (pentane:EtOAc = 4:1) = 0.30;  $^1\text{H NMR}$  (400 MHz, Chloroform-*d*)  $\delta$  7.87 – 7.80 (m, 4H), 7.75 (d,  $J$  = 8.3 Hz, 2H), 7.53 – 7.48 (m, 3H), 7.34 (d,  $J$  = 8.1 Hz, 2H), 7.32 (s, 1H), 7.28 (s, 1H), 5.83 (t,  $J$  = 5.9 Hz, 1H), 5.31 (d,  $J$  = 13.2 Hz, 1H),

5.22 (d,  $J = 13.2$  Hz, 1H), 4.37 (q,  $J = 4.5$  Hz, 2H), 4.19 – 3.99 (m, 2H), 3.89 (s, 3H), 3.09 (ddd,  $J = 14.6, 10.5, 4.8$  Hz, 1H), 2.90 (ddd,  $J = 14.6, 10.8, 4.4$  Hz, 1H), 2.46 (s, 3H), 1.85 – 1.70 (m, 1H), 1.70 – 1.53 (m, 1H), 1.27 – 1.16 (m, 1H), 1.14 – 1.00 (m, 1H), 0.94 – 0.75 (m, 4H).  $^{13}\text{C}$  NMR (100 MHz, Chloroform- $d$ )  $\delta$  166.0, 151.8, 150.4, 143.23, 137.9, 137.6, 136.5, 133.3, 132.8, 131.7, 129.8, 128.19, 128.16, 127.6, 127.2, 126.4, 126.3, 126.2, 125.2, 124.9, 124.4, 114.4, 111.9, 70.6, 63.5, 56.3, 48.3, 46.3, 29.4, 29.1, 25.2, 25.0, 21.5; HRMS (ESI):  $m/z$ : calculated for  $\text{C}_{35}\text{H}_{37}\text{BrNO}_6\text{S}$ :  $[\text{M} + \text{H}]^+$  678.1520, found: 678.1525; HPLC (Chiralpak IF, *i*-propanol/hexane = 38/42, flow rate 0.8 mL/min,  $\lambda = 254$  nm):  $t_{\text{R}}$  (major) = 32.6 min,  $t_{\text{R}}$  (minor) = 23.7 min, 96% ee;  $[\alpha]_{\text{D}}^{25} = -67.4$  ( $c = 0.2$ ,  $\text{CHCl}_3$ ).

**( $R_p, Z$ )-12-(benzo[d][1,3]dioxol-5-yl)-1<sup>5</sup>-bromo-1<sup>2</sup>-methoxy-9-tosyl-2,14-dioxa-9-aza-1(1,4)-benzenacyclopentadecaphan-11-en-15-one (3n)**

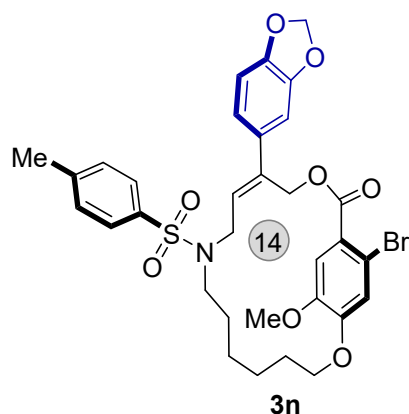

Following the general procedure, the crude product was purified by column chromatography on a silica gel to afford the product **3n** (47.3 mg, 70% yield) as colorless oil.  $R_f$  (pentane:EtOAc = 4:1) = 0.25;  $^1\text{H}$  NMR (400 MHz, Chloroform- $d$ )  $\delta$  7.72 (d,  $J = 8.3$  Hz, 2H), 7.33 (d,  $J = 8.1$  Hz, 2H), 7.30 (s, 1H), 7.25 (s, 1H), 6.88 (dd,  $J = 8.1, 1.9$  Hz, 1H), 6.82 – 6.76 (m, 2H), 5.98 (s, 2H), 5.52 (t,  $J = 5.9$  Hz, 1H), 5.13 (d,  $J = 13.2$  Hz, 1H), 5.03 (d,  $J = 13.2$  Hz, 1H), 4.41 – 4.33 (m, 2H), 4.09 – 3.90 (m, 2H), 3.89 (s, 3H), 3.04 (ddd,  $J = 14.7, 10.3, 5.0$  Hz, 1H), 2.86 (ddd,  $J = 14.5, 10.8, 4.4$  Hz, 1H), 2.46 (s, 3H), 1.82 – 1.71 (m, 1H), 1.64 – 1.54 (m, 1H), 1.22 (q,  $J = 5.1$  Hz, 1H), 1.11 – 1.00 (m, 1H), 0.97 – 0.73 (m, 4H).  $^{13}\text{C}$  NMR (100 MHz, Chloroform- $d$ )  $\delta$  165.9, 151.8, 150.4, 147.9, 147.4, 143.3, 137.9, 136.3, 134.6, 129.9, 129.7, 127.2,

126.2, 124.8, 120.1, 114.4, 111.9, 108.2, 107.0, 101.2, 70.65, 63.6, 56.3, 48.2, 46.1, 29.3, 29.2, 25.2, 25.0, 21.5; **HRMS** (ESI):  $m/z$ : calculated for  $C_{32}H_{35}BrNO_8S$ :  $[M + H]^+$  672.1262, found: 672.1268; HPLC (Chiralpak IF, *i*-propanol/hexane = 38/42, flow rate 0.8 mL/min,  $\lambda = 254$  nm):  $t_R$  (major) = 44.0 min,  $t_R$  (minor) = 31.6 min, 98% ee;  $[\alpha]_D^{25} = -72.1$  ( $c = 0.2$ ,  $CHCl_3$ ).

**(*R\_p,Z*)-1<sup>5</sup>-bromo-1<sup>2</sup>-methoxy-12-(2-methoxyphenyl)-9-tosyl-2,14-dioxa-9-aza-1(1,4)-benzenacyclopentadecaphan-11-en-15-one (3o)**

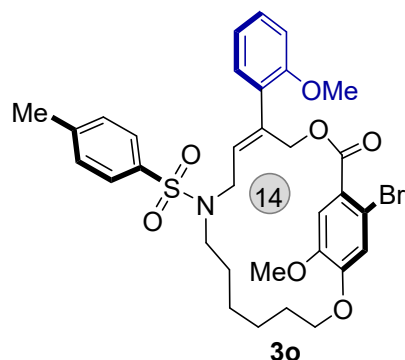

Following the general procedure, the crude product was purified by column chromatography on a silica gel to afford the product **3o** (43.1 mg, 66% yield) as colorless oil.  $R_f$  (pentane:EtOAc = 4:1) = 0.25; **<sup>1</sup>H NMR** (400 MHz, Chloroform-*d*)  $\delta$  7.70 (d,  $J = 8.4$  Hz, 2H), 7.35 – 7.24 (m, 5H), 7.08 (dd,  $J = 7.5, 1.8$  Hz, 1H), 6.96 – 6.82 (m, 2H), 5.61 (t,  $J = 6.1$  Hz, 1H), 5.17 – 4.95 (m, 2H), 4.44 – 4.25 (m, 2H), 4.09 – 3.93 (m, 2H), 3.89 (s, 3H), 3.86 (s, 3H), 3.10 (td,  $J = 10.5, 5.3$  Hz, 1H), 2.98 – 2.88 (m, 1H), 2.41 (s, 3H), 1.77 (q,  $J = 6.8$  Hz, 1H), 1.66 – 1.52 (m, 1H), 1.19 (dd,  $J = 10.3, 6.1$  Hz, 1H), 1.12 – 1.00 (m, 1H), 0.94 – 0.76 (m, 4H). **<sup>13</sup>C NMR** (100 MHz, Chloroform-*d*)  $\delta$  166.2, 156.4, 151.5, 150.4, 143.1, 137.9, 136.0, 132.6, 130.7, 129.9, 129.6, 129.2, 127.18, 127.15, 124.8, 120.7, 114.0, 111.5, 110.5, 70.5, 63.9, 56.3, 55.4, 48.1, 45.8, 29.6, 29.1, 25.3, 25.1, 21.5; **HRMS** (ESI):  $m/z$ : calculated for  $C_{32}H_{37}BrNO_7S$ :  $[M + H]^+$  658.1469, found: 658.1477; HPLC (Chiralpak IF, *i*-propanol/hexane = 38/42, flow rate 0.8 mL/min,  $\lambda = 254$  nm):  $t_R$  (major) = 18.5 min,  $t_R$  (minor) = 16.5 min, 96% ee;  $[\alpha]_D^{25} = -51.8$  ( $c = 0.2$ ,  $CHCl_3$ ).

**(*R\_p,E*)-1<sup>5</sup>-bromo-1<sup>2</sup>-methoxy-12-(thiophen-2-yl)-9-tosyl-2,14-dioxa-9-aza-1(1,4)-benzenacyclopentadecaphan-11-en-15-one (3p)**

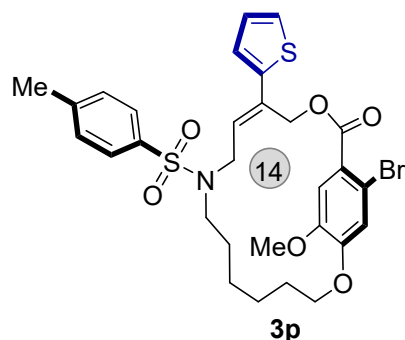

Following the general procedure, the crude product was purified by column chromatography on a silica gel to afford the product **3p** (44.8 mg, 71% yield) as colorless oil.  $R_f$  (pentane:EtOAc = 4:1) = 0.30;  $^1\text{H NMR}$  (400 MHz, Chloroform-*d*)  $\delta$  7.72 (d,  $J$  = 8.2 Hz, 2H), 7.34 (d,  $J$  = 8.0 Hz, 2H), 7.30 (s, 1H), 7.22 (s, 1H), 7.20 (dd,  $J$  = 5.2, 1.1 Hz, 1H), 7.15 (dd,  $J$  = 3.7, 1.1 Hz, 1H), 7.01 (dd,  $J$  = 5.1, 3.7 Hz, 1H), 5.75 (t,  $J$  = 6.1 Hz, 1H), 5.22 (d,  $J$  = 13.2 Hz, 1H), 5.11 (d,  $J$  = 13.2 Hz, 1H), 4.46 – 4.32 (m, 2H), 4.05 (dd,  $J$  = 6.1, 1.8 Hz, 2H), 3.88 (s, 3H), 3.00 (ddd,  $J$  = 14.1, 11.1, 5.0 Hz, 1H), 2.87 (ddd,  $J$  = 14.1, 10.9, 5.2 Hz, 1H), 2.46 (s, 3H), 1.74 (dt,  $J$  = 13.0, 7.5 Hz, 1H), 1.61 (ddd,  $J$  = 14.0, 7.4, 3.6 Hz, 1H), 1.22 (dt,  $J$  = 14.5, 7.1 Hz, 1H), 1.13 – 1.00 (m, 1H), 0.90 (dt,  $J$  = 14.0, 6.6 Hz, 2H), 0.84 – 0.71 (m, 2H).  $^{13}\text{C NMR}$  (100 MHz, Chloroform-*d*)  $\delta$  165.8, 151.8, 150.4, 143.6, 143.3, 137.8, 130.5, 129.8, 128.8, 127.7, 127.1, 126.3, 124.89, 124.85, 124.1, 114.3, 111.8, 70.7, 62.8, 56.3, 48.3, 45.9, 29.4, 29.3, 25.3, 25.0, 21.5; **HRMS** (ESI):  $m/z$ : calculated for  $\text{C}_{29}\text{H}_{33}\text{BrNO}_6\text{S}_2$ :  $[\text{M} + \text{H}]^+$  634.0928, found: 634.0935; HPLC (Chiralpak IF, *i*-propanol/hexane = 38/42, flow rate 0.8 mL/min,  $\lambda$  = 254 nm):  $t_R$  (major) = 18.5 min,  $t_R$  (minor) = 16.5 min, 96% ee;  $[\alpha]_D^{25}$  = - 48.2 ( $c$  = 0.2,  $\text{CHCl}_3$ ).

**(*R\_p*,*E*)-1<sup>5</sup>-bromo-1<sup>2</sup>-(furan-2-yl)-12-methoxy-9-tosyl-2,14-dioxa-9-aza-1(1,4)-benzenacyclopentadecaphan-11-en-15-one (3q)**

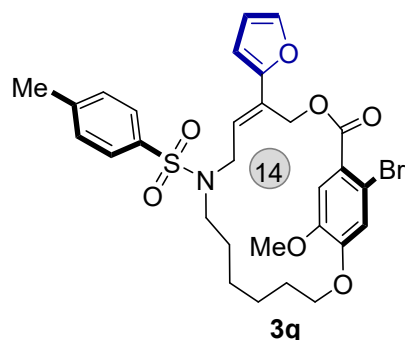

Following the general procedure, the crude product was purified by column chromatography on a silica gel to afford the product **3q** (42.7 mg, 70% yield) as white solid.  $R_f$  (pentane:EtOAc = 4:1) = 0.30;  $^1\text{H NMR}$  (400 MHz, Chloroform-*d*)  $\delta$  7.72 (d,  $J = 8.3$  Hz, 2H), 7.38 – 7.30 (m, 4H), 7.18 (s, 1H), 6.49 – 6.40 (m, 2H), 6.03 (t,  $J = 6.3$  Hz, 1H), 5.15 (d,  $J = 13.0$  Hz, 1H), 5.02 (d,  $J = 13.0$  Hz, 1H), 4.42 – 4.31 (m, 2H), 4.04 (d,  $J = 6.4$  Hz, 2H), 3.87 (s, 3H), 3.00 (ddd,  $J = 15.9, 11.3, 4.9$  Hz, 1H), 2.87 (ddd,  $J = 14.1, 11.1, 5.1$  Hz, 1H), 2.46 (s, 3H), 1.81 – 1.68 (m, 1H), 1.66 – 1.58 (m, 1H), 1.24 – 1.12 (m, 1H), 1.11 – 0.99 (m, 1H), 0.95 – 0.84 (m, 3H), 0.82 – 0.74 (m, 1H).  $^{13}\text{C NMR}$  (100 MHz, Chloroform-*d*)  $\delta$  165.9, 152.5, 151.7, 150.4, 143.2, 142.5, 137.7, 129.7, 127.18, 127.15, 126.5, 126.1, 124.8, 114.15, 111.7, 111.5, 106.6, 70.7, 60.6, 56.3, 48.3, 45.8, 29.6, 29.2, 25.3, 25.1, 21.5; **HRMS** (ESI):  $m/z$ : calculated for  $\text{C}_{29}\text{H}_{33}\text{BrNO}_7\text{S}$ :  $[\text{M} + \text{H}]^+$  618.1156, found: 618.1161; HPLC (Chiralpak IF, *i*-propanol/hexane = 38/42, flow rate 0.8 mL/min,  $\lambda = 254$  nm):  $t_R$  (major) = 31.8 min,  $t_R$  (minor) = 26.8 min, 97% ee;  $[\alpha]_D^{25} = -55.3$  ( $c = 0.2$ ,  $\text{CHCl}_3$ ).

**(*R\_p,Z*)-1<sup>5</sup>-bromo-1<sup>2</sup>-methoxy-12-((*E*-styryl)-9-tosyl-2,14-dioxa-9-aza-1(1,4)-benzenacyclopentadecaphan-11-en-15-one (3r)**

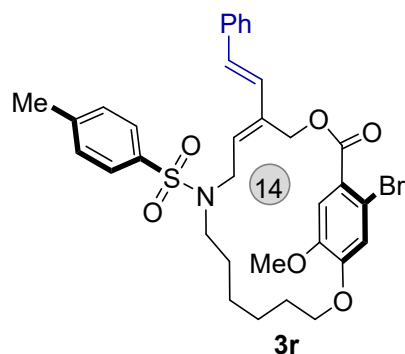

Following the general procedure, the crude product was purified by column chromatography on a silica gel to afford the product **3r** (40.8 mg, 62% yield) as colorless oil.  $R_f$  (pentane:EtOAc = 4:1) = 0.30;  $^1\text{H NMR}$  (400 MHz, Chloroform-*d*)  $\delta$  7.71 (d,  $J = 8.3$  Hz, 2H), 7.46 – 7.41 (m, 2H), 7.39 – 7.31 (m, 4H), 7.28 (d,  $J = 4.7$  Hz, 2H), 7.20 (s, 1H), 6.75 – 6.58 (m, 2H), 5.69 (t,  $J = 6.2$  Hz, 1H), 5.14 (d,  $J = 13.1$  Hz, 1H), 5.04 (d,  $J = 13.1$  Hz, 1H), 4.38 – 4.31 (m, 2H), 4.00 (d,  $J = 6.2$  Hz, 2H), 3.88 (s, 3H), 3.04 (ddd,  $J = 14.9, 10.6, 4.8$  Hz, 1H), 2.88 (ddd,  $J = 14.6, 10.9, 4.5$  Hz, 1H), 2.46 (s, 3H), 1.80 – 1.68 (m, 1H), 1.62 – 1.51 (m, 1H), 1.24 – 1.13 (m, 1H), 1.09 –

0.97 (m, 1H), 0.92 – 0.81 (m, 2H), 0.82 – 0.73 (m, 2H).  $^{13}\text{C}$  NMR (100 MHz, Chloroform-*d*)  $\delta$  166.0, 151.6, 150.4, 143.2, 137.6, 136.9, 134.1, 133.7, 129.7, 129.4, 128.7, 128.1, 127.8, 127.2, 126.6, 126.5, 124.8, 114.1, 111.7, 70.6, 59.9, 56.3, 48.4, 46.0, 29.5, 28.9, 25.3, 25.1, 21.5; HRMS (ESI): *m/z*: calculated for  $\text{C}_{33}\text{H}_{37}\text{BrNO}_6\text{S}$ :  $[\text{M} + \text{H}]^+$  654.1520, found: 654.1527; HPLC (Chiralpak IF, *i*-propanol/hexane = 38/42, flow rate 0.8 mL/min,  $\lambda$  = 254 nm):  $t_{\text{R}}$  (major) = 42.1 min,  $t_{\text{R}}$  (minor) = 34.2 min, 96% ee;  $[\alpha]_{\text{D}}^{25} = -41.7$  ( $c = 0.2$ ,  $\text{CHCl}_3$ ).

**(*R*<sub>p</sub>,*Z*)-12-benzyl-1<sup>5</sup>-bromo-1<sup>2</sup>-methoxy-9-tosyl-2,14-dioxa-9-aza-1(1,4)-benzenacyclopentadecaphan-11-en-15-one (3s)**

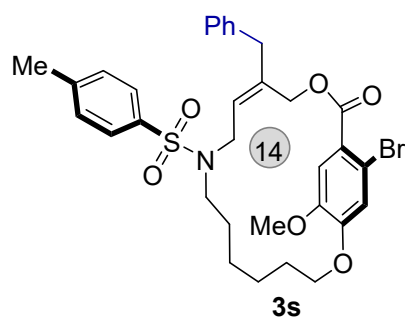

Following the general procedure, the crude product was purified by column chromatography on a silica gel to afford the product **3s** (37.2 mg, 57% yield) as colorless oil.  $R_{\text{f}}$  (pentane:EtOAc = 4:1) = 0.35;  $^1\text{H}$  NMR (400 MHz, Chloroform-*d*)  $\delta$  7.66 (d,  $J = 8.3$  Hz, 2H), 7.34 – 7.23 (m, 5H), 7.19 – 7.15 (m, 2H), 7.11 (s, 1H), 5.37 (t,  $J = 6.1$  Hz, 1H), 4.69 (d,  $J = 12.9$  Hz, 1H), 4.60 (d,  $J = 12.9$  Hz, 1H), 4.42 – 4.29 (m, 2H), 3.94 – 3.87 (m, 5H), 3.43 (d,  $J = 3.0$  Hz, 2H), 3.00 (ddd,  $J = 15.1, 10.6, 4.9$  Hz, 1H), 2.83 (ddd,  $J = 14.7, 10.8, 4.7$  Hz, 1H), 2.44 (s, 3H), 1.82 – 1.70 (m, 1H), 1.65 – 1.58 (m, 1H), 1.24 – 1.13 (m, 1H), 1.09 – 0.97 (m, 1H), 0.94 – 0.82 (m, 2H), 0.81 – 0.70 (m, 2H).  $^{13}\text{C}$  NMR (100 MHz, Chloroform-*d*)  $\delta$  166.0, 151.7, 150.4, 143.0, 138.2, 137.9, 135.7, 129.6, 129.4, 129.0, 128.5, 127.1, 126.60, 126.56, 124.9, 114.1, 111.7, 70.8, 63.0, 56.3, 48.0, 45.5, 44.0, 29.5, 29.1, 25.3, 25.1, 21.5; HRMS (ESI): *m/z*: calculated for  $\text{C}_{32}\text{H}_{37}\text{BrNO}_6\text{S}$ :  $[\text{M} + \text{H}]^+$  642.1520, found: 642.1529; HPLC (Chiralpak IF, *i*-propanol/hexane = 38/42, flow rate 0.8 mL/min,  $\lambda$  = 254 nm):  $t_{\text{R}}$  (major) = 9.3 min,  $t_{\text{R}}$  (minor) = 8.9 min, 97% ee;  $[\alpha]_{\text{D}}^{25} = -36.4$  ( $c = 0.2$ ,  $\text{CHCl}_3$ ).

**(*R*<sub>p</sub>,*Z*)-1<sup>5</sup>-bromo-12-cyclohexyl-1<sup>2</sup>-methoxy-9-tosyl-2,14-dioxa-9-aza-1(1,4)-**

**benzenacyclopentadecaphan-11-en-15-one (3t)**

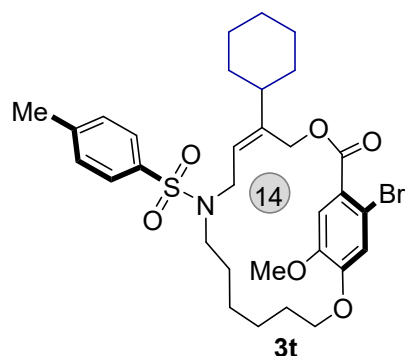

Following the general procedure, the crude product was purified by column chromatography on a silica gel to afford the product **3t** (35.8 mg, 56% yield) as colorless oil.  $R_f$  (pentane:EtOAc = 4:1) = 0.35;  $^1\text{H NMR}$  (400 MHz, Chloroform-*d*)  $\delta$  7.69 (d,  $J = 7.9$  Hz, 2H), 7.30 (d,  $J = 8.5$  Hz, 3H), 7.16 (s, 1H), 5.15 (t,  $J = 6.0$  Hz, 1H), 4.70 (q,  $J = 12.9$  Hz, 2H), 4.44 – 4.27 (m, 2H), 3.96 – 3.83 (m, 4H), 3.76 (dd,  $J = 16.9, 6.7$  Hz, 1H), 3.09 – 2.94 (m, 1H), 2.83 (t,  $J = 11.4$  Hz, 1H), 2.44 (s, 3H), 1.92 (t,  $J = 12.1$  Hz, 1H), 1.74 (dd,  $J = 26.8, 12.2$  Hz, 6H), 1.63 – 1.54 (m, 1H), 1.39 – 1.21 (m, 2H), 1.15 (t,  $J = 12.5$  Hz, 2H), 1.09 – 0.95 (m, 3H), 0.93 – 0.66 (m, 4H).  $^{13}\text{C NMR}$  (100 MHz, Chloroform-*d*)  $\delta$  166.2, 151.6, 150.4, 143.0, 141.4, 138.2, 129.6, 127.1, 126.9, 125.8, 124.9, 114.1, 111.5, 70.6, 62.9, 56.27, 47.8, 45.6, 45.3, 31.8, 31.6, 29.6, 29.2, 26.5, 26.4, 26.1, 25.2, 25.1, 21.5; **HRMS** (ESI):  $m/z$ : calculated for  $\text{C}_{31}\text{H}_{41}\text{BrNO}_6\text{S}$ :  $[\text{M} + \text{H}]^+$  634.1833, found: 634.1835; HPLC (Chiralpak IF, *i*-propanol/hexane = 38/42, flow rate 0.8 mL/min,  $\lambda = 254$  nm):  $t_R$  (major) = 19.4 min,  $t_R$  (minor) = 16.1 min, 97% ee;  $[\alpha]^{25}_D = -50.3$  ( $c = 0.2, \text{CHCl}_3$ ).

**( $R_p,Z$ )-1<sup>2,1<sup>5</sup></sup>-dibromo-12-phenyl-9-tosyl-2,14-dioxa-9-aza-1(1,4)-benzenacyclopentadecaphan-11-en-15-one (4a)**

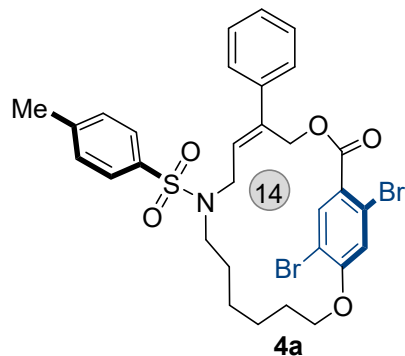

Following the general procedure, the crude product was purified by column

chromatography on a silica gel to afford the product **4a** (47.2 mg, 70% yield) as colorless oil.  $R_f$  (pentane:EtOAc = 4:1) = 0.30;  $^1\text{H NMR}$  (400 MHz, Chloroform-*d*)  $\delta$  7.87 (s, 1H), 7.72 (d,  $J$  = 8.3 Hz, 2H), 7.41 – 7.31 (m, 8H), 5.73 (dd,  $J$  = 6.8, 5.1 Hz, 1H), 5.21 – 5.06 (m, 2H), 4.53 – 4.35 (m, 2H), 4.09 – 3.86 (m, 2H), 3.10 (ddd,  $J$  = 14.7, 10.7, 4.5 Hz, 1H), 2.86 (ddd,  $J$  = 13.7, 11.0, 4.5 Hz, 1H), 2.46 (s, 3H), 1.95 – 1.81 (m, 1H), 1.61 – 1.52 (m, 1H), 1.32 – 1.23 (m, 1H), 1.11 – 1.00 (m, 1H), 0.92 – 0.74 (m, 4H).  $^{13}\text{C NMR}$  (100 MHz, Chloroform-*d*)  $\delta$  164.8, 159.1, 143.3, 140.3, 137.7, 136.3, 135.0, 131.6, 129.7, 128.6, 127.8, 127.3, 127.2, 126.3, 123.8, 120.1, 113.7, 71.0, 63.7, 48.3, 46.2, 29.2, 29.0, 24.9, 24.9, 21.5; **HRMS** (ESI):  $m/z$ : calculated for  $\text{C}_{30}\text{H}_{32}\text{Br}_2\text{NO}_5\text{S}$ :  $[\text{M} + \text{H}]^+$  678.0342, found: 678.0350; HPLC (Chiralpak IF, *i*-propanol/hexane = 38/42, flow rate 0.8 mL/min,  $\lambda$  = 254 nm):  $t_R$  (major) = 25.3 min,  $t_R$  (minor) = 16.4 min, 92% ee;  $[\alpha]_D^{25} = -58.3$  ( $c$  = 0.2,  $\text{CHCl}_3$ ).

**( $R_p, Z$ )-1<sup>5</sup>-bromo-1<sup>2</sup>-chloro-12-phenyl-9-tosyl-2,14-dioxa-9-aza-1(1,4)-benzenacyclopentadecaphan-11-en-15-one (4b)**

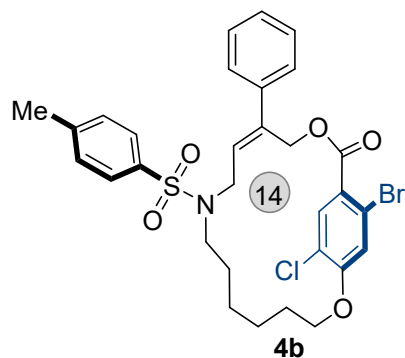

Following the general procedure, the crude product was purified by column chromatography on a silica gel to afford the product **4b** (44.8 mg, 71% yield) as colorless oil.  $R_f$  (pentane:EtOAc = 4:1) = 0.30;  $^1\text{H NMR}$  (400 MHz, Chloroform-*d*)  $\delta$  7.72 (d,  $J$  = 8.6 Hz, 3H), 7.41 – 7.30 (m, 8H), 5.79 – 5.66 (m, 1H), 5.22 – 5.05 (m, 2H), 4.53 – 4.35 (m, 2H), 4.09 – 3.84 (m, 2H), 3.09 (ddd,  $J$  = 14.9, 10.8, 4.6 Hz, 1H), 2.85 (ddd,  $J$  = 14.6, 11.1, 4.2 Hz, 1H), 2.46 (s, 3H), 1.85 (ddd,  $J$  = 14.6, 10.3, 5.7 Hz, 1H), 1.62 – 1.51 (m, 1H), 1.32 – 1.21 (m, 1H), 1.11 – 0.98 (m, 1H), 0.94 – 0.70 (m, 4H).  $^{13}\text{C NMR}$  (100 MHz, Chloroform-*d*)  $\delta$  164.9, 158.1, 143.3, 140.3, 137.7, 136.4, 132.1, 131.6, 129.7, 128.6, 127.9, 127.2, 127.0, 126.3, 124.8, 124.3, 119.3, 71.1, 63.7, 48.3, 46.2, 29.2, 29.0, 25.0, 24.8, 21.5; **HRMS** (ESI):  $m/z$ : calculated for



C<sub>30</sub>H<sub>32</sub>BrClNO<sub>5</sub>S: [M + H]<sup>+</sup> 632.0868, found: 632.0874; HPLC (Chiralpak IF, *i*-propanol/hexane = 38/42, flow rate 0.8 mL/min, λ = 254 nm): *t*<sub>R</sub> (major) = 22.6 min, *t*<sub>R</sub> (minor) = 16.4 min, 92% ee; [α]<sup>25</sup><sub>D</sub> = -52.4 (*c* = 0.2, CHCl<sub>3</sub>).

**(*R*<sub>p</sub>)-ethyl(*Z*)-1<sup>5</sup>-bromo-15-oxo-12-phenyl-9-tosyl-2,14-dioxa-9-aza-1(1,4)-benzenacyclopentadecaphan-11-ene-1<sup>2</sup>-carboxylate (4c)**

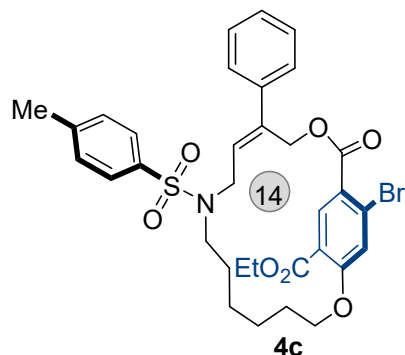

Following the general procedure, the crude product was purified by column chromatography on a silica gel to afford the product **4c** (45.1 mg, 67% yield) as colorless oil. *R*<sub>f</sub> (pentane:EtOAc = 4:1) = 0.30; <sup>1</sup>H NMR (400 MHz, Chloroform-*d*) δ 8.15 (s, 1H), 7.72 (d, *J* = 8.3 Hz, 2H), 7.44 (s, 1H), 7.39 – 7.30 (m, 7H), 5.72 (dd, *J* = 6.7, 5.2 Hz, 1H), 5.22 – 5.07 (m, 2H), 4.51 (ddd, *J* = 12.1, 9.0, 2.8 Hz, 1H), 4.44 – 4.30 (m, 3H), 4.12 – 3.90 (m, 2H), 3.07 (ddd, *J* = 14.6, 10.8, 4.6 Hz, 1H), 2.88 (ddd, *J* = 14.5, 11.0, 4.4 Hz, 1H), 2.46 (s, 3H), 1.92 – 1.77 (m, 1H), 1.67 – 1.50 (m, 1H), 1.39 (t, *J* = 7.1 Hz, 3H), 1.28 – 1.16 (m, 1H), 1.14 – 0.96 (m, 1H), 0.97 – 0.69 (m, 4H). <sup>13</sup>C NMR (100 MHz, Chloroform-*d*) δ 165.2, 164.3, 162.2, 143.3, 140.3, 137.9, 136.4, 133.7, 131.7, 129.7, 128.5, 127.8, 127.1, 126.3, 126.1, 125.2, 124.7, 122.2, 71.2, 63.5, 61.5, 48.2, 46.2, 29.5, 29.2, 25.1, 24.8, 21.5, 14.2; HRMS (ESI): *m/z*: calculated for C<sub>33</sub>H<sub>37</sub>BrNO<sub>7</sub>S: [M + H]<sup>+</sup> 670.1469, found: 670.1478; HPLC (Chiralpak IF, *i*-propanol/hexane = 38/42, flow rate 0.8 mL/min, λ = 254 nm): *t*<sub>R</sub> (major) = 31.3 min, *t*<sub>R</sub> (minor) = 24.0 min, 90% ee; [α]<sup>25</sup><sub>D</sub> = -46.7 (*c* = 0.2, CHCl<sub>3</sub>).

**(*R*<sub>p</sub>,*Z*)-1<sup>3</sup>-bromo-1<sup>2</sup>,1<sup>6</sup>-dimethoxy-12-phenyl-9-tosyl-2,14-dioxa-9-aza-1(1,4)-benzenacyclopentadecaphan-11-en-15-one (4d)**

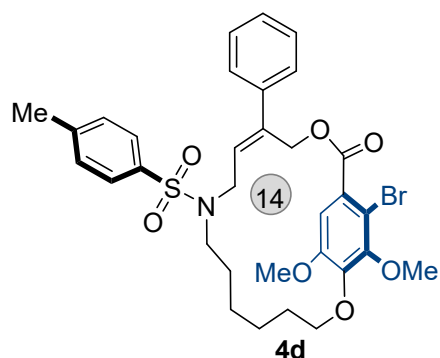

Following the general procedure, the crude product was purified by column chromatography on a silica gel to afford the product **4d** (47.8 mg, 73% yield) as colorless oil.  $R_f$  (pentane:EtOAc = 4:1) = 0.25;  $^1\text{H NMR}$  (400 MHz, Chloroform-*d*)  $\delta$  7.71 (d,  $J$  = 7.9 Hz, 2H), 7.34 (dd,  $J$  = 16.1, 6.9 Hz, 7H), 6.98 (s, 1H), 5.72 (t,  $J$  = 6.2 Hz, 1H), 5.20 (d,  $J$  = 13.0 Hz, 1H), 5.10 (d,  $J$  = 13.0 Hz, 1H), 4.43 (ddd,  $J$  = 11.3, 8.0, 2.7 Hz, 1H), 4.29 (ddd,  $J$  = 11.6, 7.1, 3.0 Hz, 1H), 4.06 (qd,  $J$  = 17.2, 6.3 Hz, 2H), 3.91 (s, 3H), 3.89 (s, 3H), 3.06 (ddd,  $J$  = 15.6, 11.0, 5.2 Hz, 1H), 2.85 (ddd,  $J$  = 14.5, 10.7, 5.2 Hz, 1H), 2.45 (s, 3H), 1.75 – 1.62 (m, 1H), 1.62 – 1.50 (m, 1H), 1.13 – 0.99 (m, 2H), 1.00 – 0.86 (m, 1H), 0.86 – 0.58 (m, 3H).  $^{13}\text{C NMR}$  (100 MHz, Chloroform-*d*)  $\delta$  166.4, 153.0, 151.5, 144.4, 143.2, 140.4, 137.8, 136.5, 131.6, 129.7, 128.5, 128.3, 127.8, 127.1, 126.2, 108.8, 107.9, 71.0, 63.3, 60.9, 56.4, 48.0, 46.1, 29.8, 29.0, 26.1, 25.3, 21.5; **HRMS** (ESI):  $m/z$ : calculated for  $\text{C}_{32}\text{H}_{37}\text{BrNO}_7\text{S}$ :  $[\text{M} + \text{H}]^+$  658.1469, found: 658.1475; HPLC (Chiralpak IF, *i*-propanol/hexane = 28/52, flow rate 0.8 mL/min,  $\lambda$  = 254 nm):  $t_R$  (major) = 18.2 min,  $t_R$  (minor) = 16.3 min, 94% ee;  $[\alpha]_D^{25}$  = -40.2 ( $c$  = 0.2,  $\text{CHCl}_3$ ).

**(*R\_p, Z*)-1<sup>5</sup>-bromo-1<sup>2</sup>-methyl-12-phenyl-9-tosyl-2,14-dioxa-9-aza-1(1,4)-benzenacyclopentadecaphan-11-en-15-one (4e)**

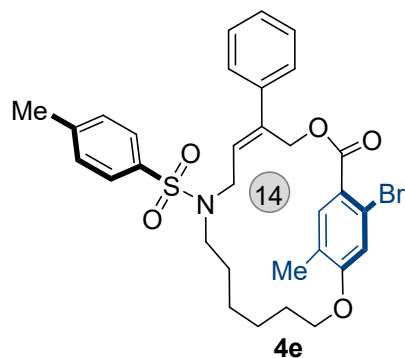

Following the general procedure, the crude product was purified by column

chromatography on a silica gel to afford the product **4e** (42.7 mg, 71% yield) as colorless oil.  $R_f$  (pentane:EtOAc = 4:1) = 0.35;  $^1\text{H NMR}$  (400 MHz, Chloroform-*d*)  $\delta$  7.72 (d,  $J$  = 8.3 Hz, 2H), 7.50 (s, 1H), 7.42 – 7.30 (m, 7H), 7.25 (s, 1H), 5.71 (dd,  $J$  = 6.7, 5.1 Hz, 1H), 5.17 (d,  $J$  = 13.1 Hz, 1H), 5.07 (d,  $J$  = 13.1 Hz, 1H), 4.45 (ddd,  $J$  = 12.4, 9.5, 2.8 Hz, 1H), 4.28 (dt,  $J$  = 12.4, 4.7 Hz, 1H), 4.12 – 3.85 (m, 2H), 3.10 (ddd,  $J$  = 15.0, 10.9, 4.4 Hz, 1H), 2.83 (ddd,  $J$  = 13.4, 10.9, 4.5 Hz, 1H), 2.46 (s, 3H), 2.21 (s, 3H), 1.79 (ddd,  $J$  = 14.7, 9.9, 4.9 Hz, 1H), 1.61 – 1.49 (m, 1H), 1.34 – 1.18 (m, 1H), 1.03 (ddd,  $J$  = 15.3, 8.3, 4.3 Hz, 1H), 0.89 – 0.70 (m, 4H).  $^{13}\text{C NMR}$  (100 MHz, Chloroform-*d*)  $\delta$  166.2, 160.8, 143.2, 140.5, 137.8, 136.5, 133.0, 131.5, 129.7, 128.5, 128.3, 127.7, 127.2, 126.3, 125.5, 121.9, 118.4, 69.5, 63.3, 48.4, 46.3, 29.5, 29.1, 24.9, 24.9, 21.5, 15.7; **HRMS** (ESI):  $m/z$ : calculated for  $\text{C}_{31}\text{H}_{35}\text{BrNO}_5\text{S}$ :  $[\text{M} + \text{H}]^+$  612.1414, found: 612.1419; HPLC (Chiralpak IF, *i*-propanol/hexane = 28/52, flow rate 0.8 mL/min,  $\lambda$  = 254 nm):  $t_R$  (major) = 23.1 min,  $t_R$  (minor) = 15.3 min, 97% ee;  $[\alpha]_D^{25} = -63.7$  ( $c$  = 0.2,  $\text{CHCl}_3$ ).

**( $R_p, Z$ )-1<sup>2</sup>,1<sup>5</sup>-dichloro-12-phenyl-9-tosyl-2,14-dioxa-9-aza-1(1,4)-benzenacyclopentadecaphan-11-en-15-one (4f)**

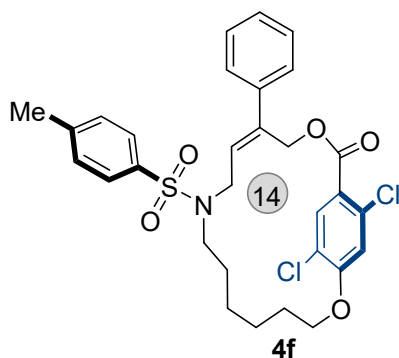

Following the general procedure, the crude product was purified by column chromatography on a silica gel to afford the product **4f** (38.6 mg, 66% yield) as colorless oil.  $R_f$  (pentane:EtOAc = 4:1) = 0.30;  $^1\text{H NMR}$  (400 MHz, Chloroform-*d*)  $\delta$  7.76 (s, 1H), 7.72 (d,  $J$  = 8.3 Hz, 2H), 7.39 – 7.30 (m, 7H), 7.19 (s, 1H), 5.70 (dd,  $J$  = 6.6, 5.1 Hz, 1H), 5.19 (d,  $J$  = 13.2 Hz, 1H), 5.10 (d,  $J$  = 13.2 Hz, 1H), 4.44 (dt,  $J$  = 10.1, 3.9 Hz, 2H), 3.97 (qd,  $J$  = 17.7, 5.9 Hz, 2H), 3.06 (ddd,  $J$  = 14.7, 10.6, 4.5 Hz, 1H), 2.84 (ddd,  $J$  = 13.7, 10.9, 4.4 Hz, 1H), 2.46 (s, 3H), 1.95 – 1.78 (m, 1H), 1.65 – 1.50 (m, 1H), 1.36 – 1.21 (m, 1H), 1.14 – 0.98 (m, 1H), 0.95 – 0.69 (m, 4H).  $^{13}\text{C}$

**NMR** (100 MHz, Chloroform-*d*)  $\delta$  164.5, 158.2, 143.3, 140.3, 137.7, 136.5, 132.3, 132.1, 131.4, 129.8, 128.6, 127.9, 127.2, 126.3, 124.7, 124.1, 121.0, 71.0, 63.8, 48.3, 46.2, 29.1, 28.9, 24.9, 24.8, 21.5; **HRMS** (ESI): *m/z*: calculated for C<sub>30</sub>H<sub>32</sub>Cl<sub>2</sub>NO<sub>5</sub>S: [M + H]<sup>+</sup> 588.1373, found: 588.1380; HPLC (Chiralpak IF, *i*-propanol/hexane = 28/52, flow rate 0.8 mL/min,  $\lambda$  = 254 nm): *t*<sub>R</sub> (major) = 19.6 min, *t*<sub>R</sub> (minor) = 14.8 min, 97% ee;  $[\alpha]_D^{25}$  = - 59.7 (*c* = 0.2, CHCl<sub>3</sub>).

**(*R*<sub>p</sub>,*Z*)-1<sup>5</sup>-chloro-1<sup>2</sup>-methoxy-12-phenyl-9-tosyl-2,14-dioxa-9-aza-1(1,4)-benzenacyclopentadecaphan-11-en-15-one (4g)**

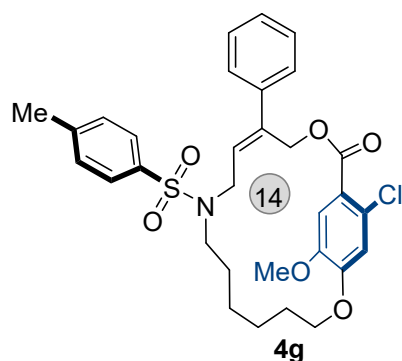

Following the general procedure, the crude product was purified by column chromatography on a silica gel to afford the product **4g** (41.1 mg, 70% yield) as colorless oil. **R<sub>f</sub>** (pentane:EtOAc = 4:1) = 0.30; **<sup>1</sup>H NMR** (400 MHz, Chloroform-*d*)  $\delta$  7.72 (d, *J* = 8.3 Hz, 2H), 7.42 – 7.28 (m, 8H), 7.12 (s, 1H), 5.66 (t, *J* = 5.8 Hz, 1H), 5.23 (d, *J* = 13.2 Hz, 1H), 5.08 (d, *J* = 13.2 Hz, 1H), 4.42 – 4.27 (m, 2H), 4.02 (qd, *J* = 17.8, 5.9 Hz, 2H), 3.89 (s, 3H), 3.03 (ddd, *J* = 14.5, 10.1, 5.1 Hz, 1H), 2.86 (ddd, *J* = 14.6, 10.8, 4.3 Hz, 1H), 2.46 (s, 3H), 1.83 – 1.69 (m, 1H), 1.65 – 1.47 (m, 1H), 1.27 – 1.13 (m, 1H), 1.12 – 0.97 (m, 1H), 0.96 – 0.69 (m, 4H). **<sup>13</sup>C NMR** (100 MHz, Chloroform-*d*)  $\delta$  165.5, 151.9, 149.9, 143.2, 140.4, 137.8, 136.8, 131.1, 129.7, 128.5, 127.8, 127.2, 126.4, 125.2, 123.9, 121.6, 114.2, 70.6, 63.6, 56.3, 48.3, 46.1, 29.3, 29.1, 25.1, 25.0, 21.5; **HRMS** (ESI): *m/z*: calculated for C<sub>31</sub>H<sub>35</sub>ClNO<sub>6</sub>S: [M + H]<sup>+</sup> 584.1869, found: 584.1977; HPLC (Chiralpak IF, *i*-propanol/hexane = 28/52, flow rate 0.8 mL/min,  $\lambda$  = 254 nm): *t*<sub>R</sub> (major) = 21.2 min, *t*<sub>R</sub> (minor) = 17.4 min, 96% ee;  $[\alpha]_D^{25}$  = - 60.4 (*c* = 0.2, CHCl<sub>3</sub>).

**(*R*<sub>p</sub>,*Z*)-1<sup>2</sup>-methoxy-1<sup>5</sup>,12-diphenyl-9-tosyl-2,14-dioxa-9-aza-1(1,4)-benzenacyclopentadecaphan-11-en-15-one (4h)**

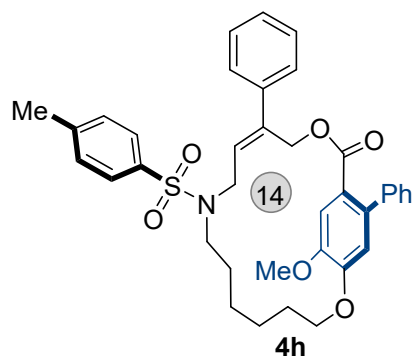

Following the general procedure, the crude product was purified by column chromatography on a silica gel to afford the product **4h** (46.0 mg, 74% yield) as colorless oil.  $R_f$  (pentane:EtOAc = 4:1) = 0.30;  $^1\text{H NMR}$  (400 MHz, Chloroform-*d*)  $\delta$  7.68 (d,  $J$  = 7.9 Hz, 2H), 7.39 – 7.29 (m, 8H), 7.25 – 7.19 (m, 3H), 7.16 (s, 1H), 6.84 (dd,  $J$  = 7.3, 2.3 Hz, 2H), 5.41 (dd,  $J$  = 7.7, 4.3 Hz, 1H), 5.08 (d,  $J$  = 13.0 Hz, 1H), 4.44 (t,  $J$  = 4.8 Hz, 2H), 4.32 (d,  $J$  = 13.0 Hz, 1H), 3.96 (s, 3H), 3.95 – 3.87 (m, 1H), 3.62 (dd,  $J$  = 17.5, 7.7 Hz, 1H), 3.04 – 2.89 (m, 1H), 2.74 (ddd,  $J$  = 14.3, 11.1, 4.2 Hz, 1H), 2.45 (s, 3H), 1.96 – 1.83 (m, 1H), 1.69 – 1.55 (m, 1H), 1.36 – 1.23 (m, 1H), 1.07 (ddd,  $J$  = 18.6, 10.2, 5.9 Hz, 2H), 0.94 – 0.78 (m, 3H).  $^{13}\text{C NMR}$  (100 MHz, Chloroform-*d*)  $\delta$  168.9, 151.1, 150.1, 143.2, 140.8, 140.4, 137.9, 136.9, 135.9, 130.6, 129.7, 128.5, 128.2, 128.2, 127.5, 127.3, 127.1, 126.1, 124.7, 121.4, 113.7, 70.5, 62.9, 56.2, 47.8, 45.9, 29.7, 29.3, 25.2, 25.1, 21.5; **HRMS** (ESI):  $m/z$ : calculated for  $\text{C}_{37}\text{H}_{40}\text{NO}_6\text{S}$ :  $[\text{M} + \text{H}]^+$  626.2571, found: 626.2577; HPLC (Chiralpak IF, *i*-propanol/hexane = 28/52, flow rate 0.8 mL/min,  $\lambda$  = 254 nm):  $t_R$  (major) = 33.0 min,  $t_R$  (minor) = 18.5 min, >99% ee;  $[\alpha]_D^{25} = -72.3$  ( $c$  = 0.2,  $\text{CHCl}_3$ ).

**(*R\_p*,*Z*)-1<sup>2</sup>-methoxy-12-phenyl-1<sup>5</sup>-(thiophen-3-yl)-9-tosyl-2,14-dioxa-9-aza-1(1,4)-benzenacyclopentadecaphan-11-en-15-one (4i)**

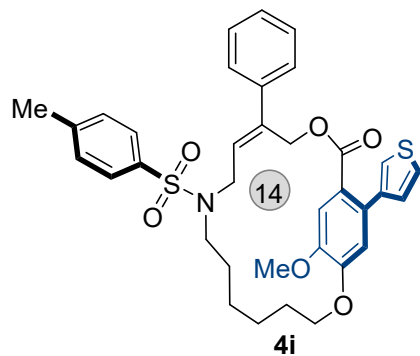

Following the general procedure, the crude product was purified by column

chromatography on a silica gel to afford the product **4i** (47.8 mg, 76% yield) as colorless oil.  $R_f$  (pentane:EtOAc = 4:1) = 0.30;  $^1\text{H NMR}$  (400 MHz, Chloroform-*d*)  $\delta$  7.69 (d,  $J$  = 8.3 Hz, 2H), 7.32 (d,  $J$  = 8.0 Hz, 2H), 7.26 (dd,  $J$  = 6.0, 4.2 Hz, 5H), 7.17 (d,  $J$  = 2.8 Hz, 2H), 7.07 (dd,  $J$  = 4.9, 1.3 Hz, 1H), 7.05 – 7.00 (m, 2H), 5.46 (dd,  $J$  = 7.3, 4.8 Hz, 1H), 5.13 (d,  $J$  = 13.1 Hz, 1H), 4.49 (d,  $J$  = 13.1 Hz, 1H), 4.44 – 4.37 (m, 2H), 3.94 (s, 3H), 3.89 (dd,  $J$  = 17.6, 4.7 Hz, 1H), 3.69 (dd,  $J$  = 17.5, 7.3 Hz, 1H), 2.96 (ddd,  $J$  = 14.5, 10.1, 5.0 Hz, 1H), 2.85 – 2.69 (m, 1H), 2.46 (s, 3H), 1.93 – 1.76 (m, 1H), 1.63 (ddd,  $J$  = 19.5, 9.3, 5.1 Hz, 1H), 1.35 – 1.21 (m, 1H), 1.15 – 0.97 (m, 2H), 0.95 – 0.74 (m, 3H).  $^{13}\text{C NMR}$  (100 MHz, Chloroform-*d*)  $\delta$  168.8, 151.0, 150.2, 143.2, 141.1, 140.3, 137.9, 136.8, 130.7, 130.0, 129.7, 128.3, 128.1, 127.6, 127.1, 126.1, 125.7, 124.8, 121.8, 121.1, 113.4, 70.4, 63.0, 56.2, 47.9, 45.8, 29.6, 29.2, 25.2, 25.1, 21.5; **HRMS** (ESI):  $m/z$ : calculated for  $\text{C}_{35}\text{H}_{38}\text{NO}_6\text{S}_2$ :  $[\text{M} + \text{H}]^+$  632.2136, found: 632.2141; HPLC (Chiralpak IF, *i*-propanol/hexane = 28/52, flow rate 0.8 mL/min,  $\lambda$  = 254 nm):  $t_R$  (major) = 55.4 min,  $t_R$  (minor) = 20.7 min, 98% ee;  $[\alpha]_D^{25} = -69.3$  ( $c$  = 0.2,  $\text{CHCl}_3$ ).

**(*R\_p,Z*)-1<sup>2</sup>-methoxy-12-phenyl-1<sup>5</sup>-(thiophen-2-yl)-9-tosyl-2,14-dioxa-9-aza-1(1,4)-benzenacyclopentadecaphan-11-en-15-one (4j)**

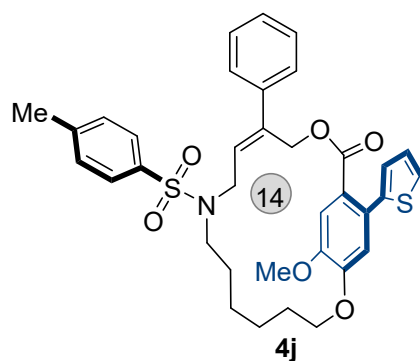

Following the general procedure, the crude product was purified by column chromatography on a silica gel to afford the product **4j** (47.1 mg, 75% yield) as colorless oil.  $R_f$  (pentane:EtOAc = 4:1) = 0.30;  $^1\text{H NMR}$  (400 MHz, Chloroform-*d*)  $\delta$  7.69 (d,  $J$  = 8.3 Hz, 2H), 7.31 (d,  $J$  = 8.0 Hz, 2H), 7.26 (dd,  $J$  = 5.6, 2.9 Hz, 4H), 7.23 – 7.19 (m, 2H), 7.06 – 7.00 (m, 2H), 7.00 – 6.94 (m, 2H), 5.50 (dd,  $J$  = 7.6, 4.7 Hz, 1H), 5.11 (d,  $J$  = 12.9 Hz, 1H), 4.52 (d,  $J$  = 12.9 Hz, 1H), 4.42 (q,  $J$  = 5.2, 4.4 Hz, 2H), 3.95 (s, 4H), 3.70 (dd,  $J$  = 17.4, 7.6 Hz, 1H), 3.01 (ddd,  $J$  = 14.6, 10.3, 4.9 Hz, 1H),

2.84 – 2.72 (m, 1H), 2.46 (s, 3H), 1.91 – 1.78 (m, 1H), 1.63 (ddd,  $J = 10.7, 7.4, 3.7$  Hz, 1H), 1.34 – 1.21 (m, 1H), 1.17 – 1.05 (m, 1H), 0.98 (ddd,  $J = 18.0, 9.0, 4.8$  Hz, 1H), 0.94 – 0.74 (m, 3H).  $^{13}\text{C}$  NMR (100 MHz, Chloroform- $d$ )  $\delta$  168.7, 150.9, 150.6, 143.1, 142.1, 140.4, 137.9, 136.6, 131.0, 129.7, 128.3, 127.6, 127.6, 127.1, 126.2, 126.0, 125.6, 125.4, 121.5, 113.3, 70.4, 63.1, 56.3, 47.9, 45.9, 29.7, 29.3, 25.2, 25.1, 21.5; **HRMS** (ESI):  $m/z$ : calculated for  $\text{C}_{35}\text{H}_{38}\text{NO}_6\text{S}_2$ :  $[\text{M} + \text{H}]^+$  632.2136, found: 632.2143; HPLC (Chiralpak IF, *i*-propanol/hexane = 28/52, flow rate 0.8 mL/min,  $\lambda = 254$  nm):  $t_{\text{R}}$  (major) = 44.7 min,  $t_{\text{R}}$  (minor) = 21.1 min, 98% ee;  $[\alpha]_{\text{D}}^{25} = -64.8$  ( $c = 0.2$ ,  $\text{CHCl}_3$ ).

**( $R_p, Z$ )-1<sup>5</sup>-(furan-2-yl)-1<sup>2</sup>-methoxy-12-phenyl-9-tosyl-2,14-dioxa-9-aza-1(1,4)-benzenacyclopentadecaphan-11-en-15-one (4k)**

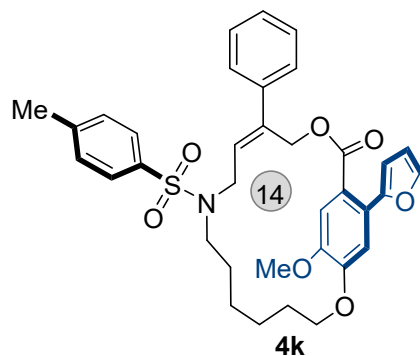

Following the general procedure, the crude product was purified by column chromatography on a silica gel to afford the product **4k** (44.8 mg, 73% yield) as colorless oil.  $R_{\text{f}}$  (pentane:EtOAc = 4:1) = 0.30;  $^1\text{H}$  NMR (400 MHz, Chloroform- $d$ )  $\delta$  7.68 (d,  $J = 8.2$  Hz, 2H), 7.34 – 7.29 (m, 7H), 7.23 – 7.16 (m, 3H), 6.42 (d,  $J = 3.3$  Hz, 1H), 6.35 (dd,  $J = 3.4, 1.8$  Hz, 1H), 5.57 (dd,  $J = 6.8, 5.3$  Hz, 1H), 5.21 (d,  $J = 13.1$  Hz, 1H), 4.72 (d,  $J = 13.1$  Hz, 1H), 4.49 – 4.33 (m, 2H), 3.93 (s, 3H), 3.86 (dd,  $J = 17.6, 5.4$  Hz, 1H), 3.73 (dd,  $J = 17.5, 6.9$  Hz, 1H), 2.99 (ddd,  $J = 14.5, 10.4, 4.6$  Hz, 1H), 2.80 – 2.68 (m, 1H), 2.45 (s, 3H), 1.88 – 1.76 (m, 1H), 1.67 – 1.59 (m, 1H), 1.33 – 1.21 (m, 1H), 1.12 – 1.02 (m, 1H), 0.98 – 0.78 (m, 4H).  $^{13}\text{C}$  NMR (100 MHz, Chloroform- $d$ )  $\delta$  168.6, 152.2, 150.8, 150.5, 143.1, 142.4, 140.2, 137.8, 136.2, 131.1, 129.6, 128.4, 127.7, 127.2, 126.2, 123.7, 123.6, 118.4, 113.0, 111.5, 107.3, 70.1, 63.1, 56.2, 48.0, 45.8, 29.6, 29.0, 25.1, 25.0, 21.5; **HRMS** (ESI):  $m/z$ : calculated for  $\text{C}_{35}\text{H}_{38}\text{NO}_7\text{S}$ :  $[\text{M} + \text{H}]^+$  616.2364, found: 616.2373; HPLC (Chiralpak IF, *i*-

propanol/hexane = 28/52, flow rate 0.8 mL/min,  $\lambda = 254$  nm):  $t_R$  (major) = 38.6 min,  $t_R$  (minor) = 23.6 min, 92% ee;  $[\alpha]^{25}_D = -57.3$  ( $c = 0.2$ ,  $\text{CHCl}_3$ ).

**(*R\_p, Z*)-1<sup>5</sup>-bromo-1<sup>2</sup>-methoxy-12-phenyl-9-tosyl-2,5,14-trioxa-9-aza-1(1,4)-benzenacyclopentadecaphan-11-ene-6,15-dione (4I)**

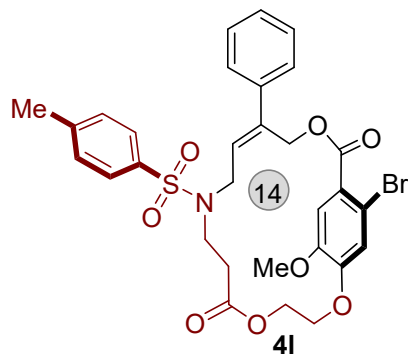

Following the general procedure, the crude product was purified by column chromatography on a silica gel to afford the product **4I** (52.3 mg, 81% yield) as colorless oil.  $R_f$  (pentane:EtOAc = 4:1) = 0.25;  $^1\text{H NMR}$  (400 MHz, Chloroform-*d*)  $\delta$  7.74 (d,  $J = 8.3$  Hz, 2H), 7.40 – 7.29 (m, 8H), 7.19 (s, 1H), 5.62 (t,  $J = 6.7$  Hz, 1H), 5.23 (d,  $J = 12.7$  Hz, 1H), 5.06 (d,  $J = 12.8$  Hz, 1H), 4.59 – 4.51 (m, 1H), 4.51 – 4.41 (m, 2H), 4.39 – 4.30 (m, 1H), 4.14 (qd,  $J = 16.9, 6.8$  Hz, 2H), 3.88 (s, 3H), 3.29 – 3.09 (m, 2H), 2.45 (s, 3H), 2.26 – 2.04 (m, 2H).  $^{13}\text{C NMR}$  (100 MHz, Chloroform-*d*)  $\delta$  169.9, 165.9, 151.0, 150.5, 143.6, 140.3, 137.8, 137.4, 130.6, 129.9, 128.6, 128.0, 127.7, 127.1, 126.2, 126.1, 114.0, 111.1, 69.1, 64.9, 62.9, 56.3, 46.6, 42.6, 32.7, 21.5; **HRMS** (ESI):  $m/z$ : calculated for  $\text{C}_{30}\text{H}_{31}\text{BrNO}_8\text{S}$ :  $[\text{M} + \text{H}]^+$  644.0949, found: 644.0954; HPLC (Chiralpak IF, *i*-propanol/hexane = 28/52, flow rate 0.8 mL/min,  $\lambda = 254$  nm):  $t_R$  (major) = 61.9 min,  $t_R$  (minor) = 48.3 min, 90% ee;  $[\alpha]^{25}_D = -55.8$  ( $c = 0.2$ ,  $\text{CHCl}_3$ ).

**(*R\_p, Z*)-1<sup>5</sup>-bromo-1<sup>2</sup>-methoxy-12-phenyl-9-tosyl-2,5,14-trioxa-9-aza-1(1,4)-benzenacyclopentadecaphan-11-en-15-one (4m)**



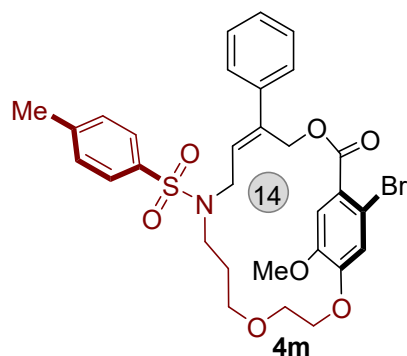

Following the general procedure, the crude product was purified by column chromatography on a silica gel to afford the product **4m** (50.5 mg, 80% yield) as colorless oil.  $R_f$  (pentane:EtOAc = 4:1) = 0.20;  $^1\text{H NMR}$  (400 MHz, Chloroform-*d*)  $\delta$  7.71 (d,  $J$  = 8.0 Hz, 2H), 7.46 – 7.30 (m, 8H), 7.21 (s, 1H), 5.76 (t,  $J$  = 6.1 Hz, 1H), 5.22 (d,  $J$  = 13.2 Hz, 1H), 5.10 (d,  $J$  = 13.2 Hz, 1H), 4.47 (dd,  $J$  = 13.3, 5.7 Hz, 1H), 4.29 (dd,  $J$  = 13.0, 6.0 Hz, 1H), 4.11 – 3.93 (m, 2H), 3.87 (s, 3H), 3.66 (dd,  $J$  = 11.8, 6.0 Hz, 1H), 3.58 (dd,  $J$  = 11.6, 6.0 Hz, 1H), 3.11 – 2.76 (m, 4H), 2.46 (s, 3H), 1.42 – 1.30 (m, 1H), 1.32 – 1.13 (m, 1H).  $^{13}\text{C NMR}$  (100 MHz, Chloroform-*d*)  $\delta$  166.1, 151.6, 151.2, 143.4, 140.4, 137.2, 136.9, 131.2, 129.8, 128.6, 127.9, 127.2, 127.0, 126.6, 126.4, 114.0, 111.3, 72.0, 70.8, 68.1, 63.5, 56.2, 46.3, 45.1, 28.8, 21.5; **HRMS** (ESI):  $m/z$ : calculated for  $\text{C}_{30}\text{H}_{33}\text{BrNO}_7\text{S}$ :  $[\text{M} + \text{H}]^+$  630.1156, found: 630.1163; HPLC (Chiralpak IF, *i*-propanol/hexane = 28/52, flow rate 0.8 mL/min,  $\lambda$  = 254 nm):  $t_R$  (major) = 31.3 min,  $t_R$  (minor) = 22.9 min, 96% ee;  $[\alpha]_D^{25} = -63.4$  ( $c$  = 0.2,  $\text{CHCl}_3$ ). **(*R\_p*,*Z*)-1<sup>5</sup>-bromo-1<sup>2</sup>-methoxy-11-phenyl-8-tosyl-2,13-dioxa-8-aza-1(1,4)-benzenacyclotetradecaphan-10-en-14-one (4n)**

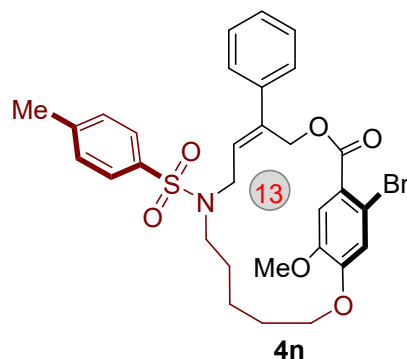

Following the general procedure, the crude product was purified by column chromatography on a silica gel to afford the product **4n** (34.2 mg, 56% yield) as colorless oil.  $R_f$  (pentane:EtOAc = 4:1) = 0.30;  $^1\text{H NMR}$  (400 MHz, Chloroform-*d*)  $\delta$

7.72 (d,  $J = 8.3$  Hz, 2H), 7.37 (s, 1H), 7.31 (dd,  $J = 8.0, 1.8$  Hz, 5H), 7.28 – 7.24 (m, 2H), 7.22 (s, 1H), 5.35 (d,  $J = 14.1$  Hz, 1H), 5.27 (t,  $J = 5.5$  Hz, 1H), 5.05 (dd,  $J = 14.1, 1.7$  Hz, 1H), 4.42 (ddd,  $J = 12.3, 5.7, 3.3$  Hz, 1H), 4.29 (ddd,  $J = 12.0, 9.2, 2.2$  Hz, 1H), 4.04 (dd,  $J = 18.5, 4.8$  Hz, 1H), 3.89 (s, 3H), 3.83 (dd,  $J = 18.7, 6.1$  Hz, 1H), 3.01 (ddd,  $J = 14.8, 9.6, 5.5$  Hz, 1H), 2.57 (ddd,  $J = 14.8, 9.7, 5.5$  Hz, 1H), 2.46 (s, 3H), 1.92 – 1.79 (m, 0H), 1.65 – 1.51 (m, 1H), 1.27 – 1.19 (m, 1H), 1.19 – 1.08 (m, 1H), 1.05 – 0.88 (m, 1H), 0.82 – 0.68 (m, 1H).  $^{13}\text{C}$  NMR (100 MHz, Chloroform- $d$ )  $\delta$  165.9, 152.2, 150.9, 143.2, 139.9, 138.4, 137.8, 129.7, 129.7, 128.4, 127.9, 127.2, 126.7, 125.9, 114.6, 111.9, 72.0, 64.5, 56.4, 49.1, 47.3, 30.6, 28.7, 23.6, 21.5; HRMS (ESI):  $m/z$ : calculated for  $\text{C}_{30}\text{H}_{33}\text{BrNO}_6\text{S}$ :  $[\text{M} + \text{H}]^+$  614.1207, found: 614.1215; HPLC (Chiralpak IF, *i*-propanol/hexane = 28/52, flow rate 0.8 mL/min,  $\lambda = 254$  nm):  $t_{\text{R}}$  (major) = 19.6 min,  $t_{\text{R}}$  (minor) = 14.8 min, 99% ee;  $[\alpha]_{\text{D}}^{25} = -67.4$  ( $c = 0.2, \text{CHCl}_3$ ).

**( $R_p, Z$ )-1<sup>5</sup>-bromo-1<sup>2</sup>-methoxy-13-phenyl-10-tosyl-2,15-dioxa-10-aza-1(1,4)-benzenacyclohexadecaphan-12-en-16-one (4o)**

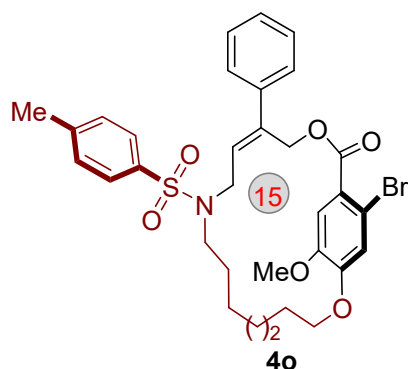

Following the general procedure, the crude product was purified by column chromatography on a silica gel to afford the product **4o** (47.7 mg, 74% yield) as colorless oil.  $R_f$  (pentane:EtOAc = 4:1) = 0.30;  $^1\text{H}$  NMR (400 MHz, Chloroform- $d$ )  $\delta$  7.74 (d,  $J = 8.3$  Hz, 2H), 7.36 – 7.30 (m, 8H), 7.28 (s, 1H), 5.49 (t,  $J = 5.9$  Hz, 1H), 5.23 – 5.11 (m, 2H), 4.42 (dt,  $J = 6.5, 4.5$  Hz, 2H), 4.21 (dd,  $J = 18.0, 6.3$  Hz, 1H), 4.09 (dd,  $J = 17.7, 5.9$  Hz, 1H), 3.90 (s, 3H), 3.10 (ddd,  $J = 14.7, 9.4, 5.5$  Hz, 1H), 2.95 (ddd,  $J = 14.5, 9.3, 5.8$  Hz, 1H), 2.46 (s, 3H), 1.77 – 1.62 (m, 2H), 1.31 – 1.13 (m, 3H), 1.13 – 1.05 (m, 1H), 1.03 – 0.92 (m, 2H), 0.87 – 0.77 (m, 1H), 0.77 – 0.66 (m, 1H).  $^{13}\text{C}$  NMR (100 MHz, Chloroform- $d$ )  $\delta$  165.6, 151.5, 149.8, 143.2, 140.3,

138.1, 137.4, 130.2, 129.7, 128.5, 127.8, 127.2, 126.3, 124.7, 123.1, 114.4, 112.5, 70.2, 63.4, 56.2, 47.8, 46.1, 28.5, 28.3, 27.7, 26.6, 25.0, 21.5; **HRMS** (ESI):  $m/z$ : calculated for  $C_{32}H_{37}BrNO_6S$ :  $[M + H]^+$  642.1520, found: 642.1526; HPLC (Chiralpak IF, *i*-propanol/hexane = 28/52, flow rate 0.8 mL/min,  $\lambda$  = 254 nm):  $t_R$  (major) = 25.9 min,  $t_R$  (minor) = 22.8 min, 98% ee;  $[\alpha]_D^{25} = -60.8$  ( $c = 0.2$ ,  $CHCl_3$ ).

**(Z)-1<sup>5</sup>-bromo-1<sup>2</sup>-methoxy-14-phenyl-11-tosyl-2,16-dioxa-11-aza-1(1,4)-benzenacycloheptadecaphan-13-en-17-one (4p)**

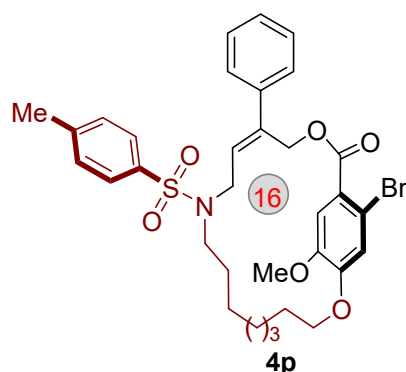

Following the general procedure, the crude product was purified by column chromatography on a silica gel to afford the product **4p** (48.2 mg, 73% yield) as colorless oil.  $R_f$  (pentane:EtOAc = 4:1) = 0.30; **<sup>1</sup>H NMR** (400 MHz, Chloroform-*d*)  $\delta$  7.74 (d,  $J = 8.3$  Hz, 2H), 7.42 – 7.31 (m, 7H), 7.30 (s, 1H), 7.22 (s, 1H), 5.82 (t,  $J = 6.6$  Hz, 1H), 5.21 (d,  $J = 12.5$  Hz, 1H), 5.07 (d,  $J = 12.5$  Hz, 1H), 4.42 (ddd,  $J = 12.0$ , 6.9, 4.2 Hz, 2H), 4.13 (d,  $J = 6.6$  Hz, 2H), 3.84 (s, 3H), 3.13 – 2.92 (m, 2H), 2.46 (s, 3H), 1.80 – 1.68 (m, 1H), 1.68 – 1.59 (m, 1H), 1.26 (ddd,  $J = 26.8$ , 11.3, 6.9 Hz, 4H), 1.15 – 1.00 (m, 1H), 0.85 – 0.73 (m, 2H), 0.74 – 0.57 (m, 2H). **<sup>13</sup>C NMR** (100 MHz, Chloroform-*d*)  $\delta$  165.6, 151.1, 149.5, 143.2, 140.2, 137.7, 136.6, 131.1, 129.8, 128.6, 127.9, 127.1, 126.1, 123.8, 122.1, 114.5, 113.0, 69.6, 62.1, 56.1, 47.9, 46.1, 29.0, 28.8, 27.6, 26.9, 26.7, 24.1, 21.5; **HRMS** (ESI):  $m/z$ : calculated for  $C_{33}H_{39}BrNO_6S$ :  $[M + H]^+$  656.1676, found: 656.1685.

## Investigations on the Thermal Stability of the Planar-Chirality

### Dependence of Thermal Stability on Temperature<sup>4</sup>

**3a/4n/4o** (10 mg) was dissolved in toluene (5 mL) in a Schlenk tube. Then the solution was allowed to stir at 40 °C. After 2 h, a small amount of sample (20 µL) was taken out from solution and diluted by *i*-propanol/hexane (38/42, 0.5 mL), then the ee values of the sample was determined using HPLC. Then the temperature was increased by 10 °C and allowed to stir for two more hours and checked the ee values, and same procedure was repeated up to 140 °C.

The variation of enantiomeric excess vs temperature is given below:

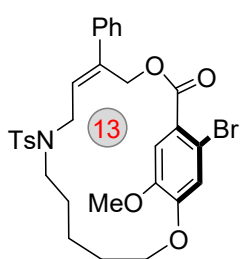

**4n**, 99% ee

No racemization at  
140 °C for 2 h in toluene

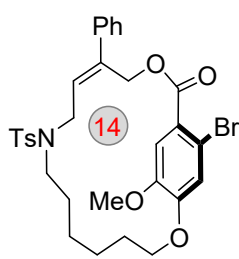

**3a**, 96% ee

No racemization at  
140 °C for 2 h in toluene

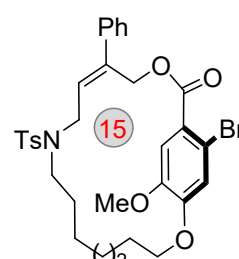

**4o**, 98% ee

$\Delta G_{\text{rot}}^\ddagger$ : 31.1 kcal/mol  
 $t_{1/2}$  (25 °C): 33.5 years

| Temperature (°C) | ee(%) for 4n | ee(%) for 3a | ee(%) for 4o |
|------------------|--------------|--------------|--------------|
| 40               | 99           | 96           | 98           |
| 50               | 99           | 96           | 98           |
| 60               | 99           | 96           | 98           |
| 70               | 99           | 96           | 96           |
| 80               | 99           | 96           | 94           |
| 90               | 99           | 96           | 87           |
| 100              | 99           | 96           | 77           |
| 110              | 99           | 96           | 55           |
| 120              | 99           | 96           | 29           |
| 130              | 99           | 96           | 9            |
| 140              | 99           | 96           | 0            |

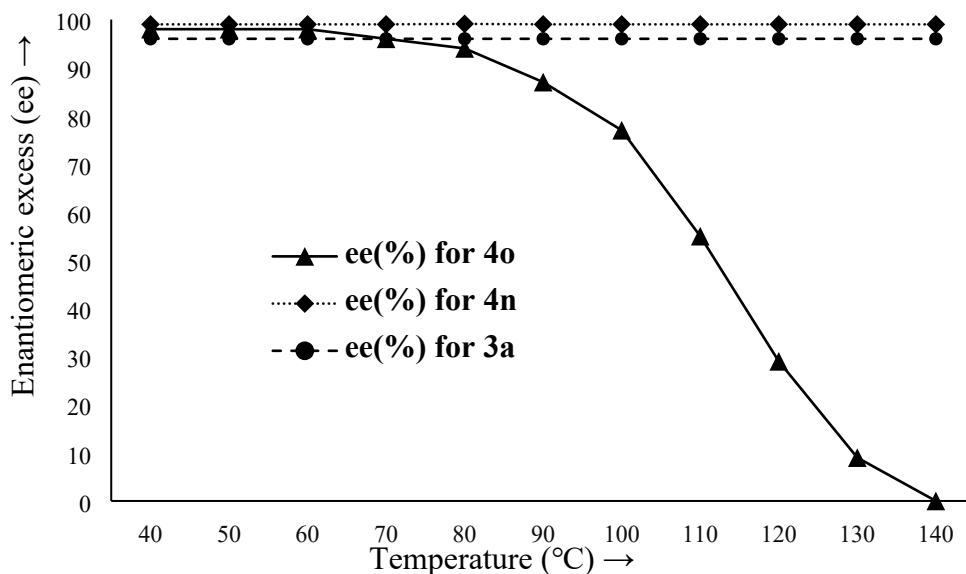

In this experiment, the planar-chiral macrocycle **3a** or **4n** was heated in toluene under sealed conditions at 140 °C, no racemization of them was observed after 2 h. For compound **4o**, the ee value remained up to 60 °C demonstrating the restricted rotation of the *ansa* chain. These results demonstrated the good thermal stability of the macrocyclic planar-chiral products.

### Experimental Determination of Rotation Barrier of **4o**<sup>5</sup>

The rotation barriers were obtained by racemization experiments of an enantiomer via chiral HPLC analysis. The racemization constant was obtained from the slope of the first-order kinetic line ( $k_{\text{racemization}} = 2 \times k_{\text{enantiomerization}}$ ). Rotation barrier ( $\Delta G^\ddagger$ ) was obtained from the Eyring equation. ( $R = 8.31451 \text{ J}\cdot\text{K}^{-1}\cdot\text{mol}^{-1}$ ,  $h = 6.62608 \times 10^{-34} \text{ J}\cdot\text{s}$  and  $k_B = 1.38066 \times 10^{-23} \text{ J}\cdot\text{K}^{-1}$ ).

$$\text{Eyring Equation: } k_{\text{enantiomerization}} = \frac{k_B \cdot T}{h} * e^{\frac{-\Delta G^\ddagger}{RT}}$$

$$\text{Half-life time: } t_{1/2} = \frac{\ln 2}{k_{\text{racemization}}}$$

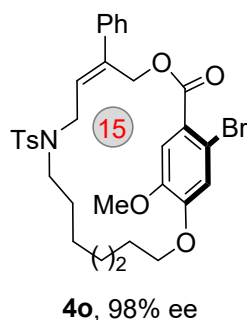

**Rotation barrier for 4o:** (10 mg) was dissolved in toluene (5 mL) and stirred at 100 °C for about 37 h. A small amount of sample (20 μL) was taken out from solution and diluted by *i*-propanol/hexane (38/42, 0.5 mL), then the ee values of the sample was determined using HPLC to monitor the percentage decrease of the second eluted enantiomer over time.

The variation of enantiomeric excess vs time is given below:

| Time (s) | % of major enantiomer (M) | % of minor enantiomer (m) | ln [(M+m)/(M-m)] |
|----------|---------------------------|---------------------------|------------------|
| 0        | 97.953                    | 2.047                     | 0.0148           |
| 7200     | 92.265                    | 7.735                     | 0.1681           |
| 18000    | 83.505                    | 16.495                    | 0.4003           |
| 28800    | 78.901                    | 21.099                    | 0.5481           |
| 46800    | 73.982                    | 26.018                    | 0.7347           |
| 61200    | 68.674                    | 31.326                    | 0.9849           |
| 75600    | 65.306                    | 34.649                    | 1.1838           |
| 90000    | 62.224                    | 37.776                    | 1.4086           |
| 104400   | 60.834                    | 39.166                    | 1.5293           |
| 118800   | 59.739                    | 40.261                    | 1.6359           |
| 133200   | 58.680                    | 41.320                    | 1.7510           |

The plot on variation of ee values with time for **4o** is presented below:

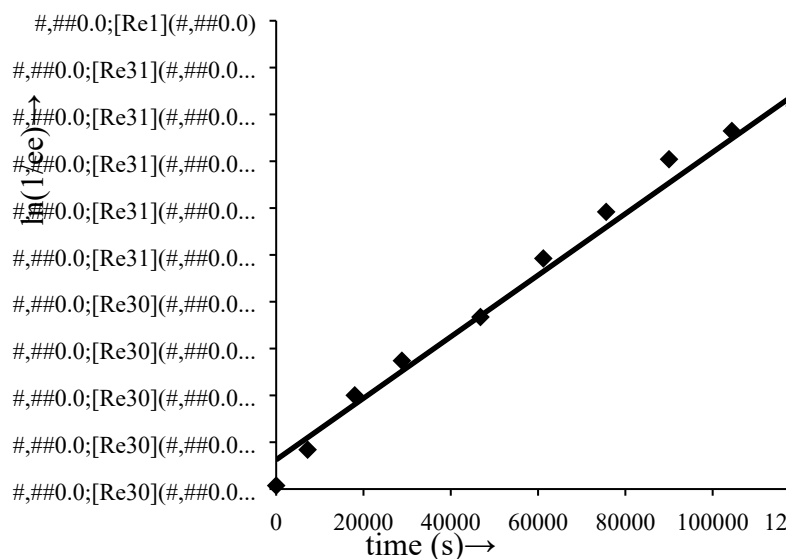

$$k_{\text{racemization}} (100\text{ }^{\circ}\text{C}) = 1.0 \times 10^{-5} \text{ s}^{-1}$$

$$k_{\text{enantiomerization}} (100\text{ }^{\circ}\text{C}) = 0.5 \times 10^{-5} \text{ s}^{-1}$$

$$t_{1/2}^{\text{rac}} (100\text{ }^{\circ}\text{C}) = \ln(2)/k_{\text{racemization}} = 69315 \text{ s} = 19.3 \text{ h}$$

Employing the Eyring equation:

$$\Delta G^{\ddagger} = RT \ln(k_B \times T / k_{\text{racemization}} \times h)$$

$$\Delta G^{\ddagger} = 8.314 \text{ J} \cdot \text{mol}^{-1} \cdot \text{K}^{-1} \times 373.15 \text{ K} \times \ln(1.38 \times 10^{-23} \text{ J} \cdot \text{K}^{-1} \times 373.15 \text{ K} / 0.5 \times 10^{-5} \text{ s}^{-1} \times 6.626 \times 10^{-34} \text{ Js})$$

$$\Delta G^{\ddagger} = 129.95 \text{ KJ} \cdot \text{mol}^{-1} = 31.1 \text{ kcal} \cdot \text{mol}^{-1}$$

$$k_{\text{racemization}} (25\text{ }^{\circ}\text{C}) = 6.57 \times 10^{-10} \text{ s}^{-1}$$

$$t_{1/2}^{\text{rac}} (25\text{ }^{\circ}\text{C}) = \ln(2)/k_{\text{racemization}} (25\text{ }^{\circ}\text{C}) = 1.06 \times 10^9 \text{ s} = 33.5 \text{ years}$$

## Gram-Scale Synthesis and Synthetic Transformations

### Gram-Scale Synthesis of 3a

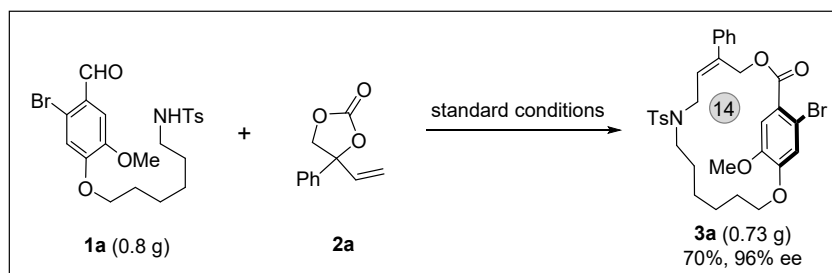

To a flame-dried Schlenk reaction tube equipped with a magnetic stir bar, was

added the catalyst Pd(PPh<sub>3</sub>)<sub>4</sub> (47.8 mg, 2.5 mol%), **L1** (21.5 mg, 3 mol%), toluene (1.5 mL) was added. The mixture was then stirred at room temperature for 0.5 h. After that, **1a** (0.8 g, 1.0 equiv.) and **2a** (0.47 g, 1.5 equiv.) were added sequentially under Ar. The reaction mixture was then stirred at room temperature for 2 h. Then the solution was transferred into a mixture of pre-NHC catalyst **C1** (20 mol%), <sup>n</sup>Bu<sub>4</sub>NOAc (50 mol%), DQ (0.12 mmol) and 4Å MS 50 mg in toluene (80.0 mL) and stirred at room temperature for another 12 h (monitored by TLC). After the reaction was completed, the reaction mixture was filtered and concentrated. The residue was purified by a silica gel flash chromatography (Hexane/EtOAc = 5:1) to afford the desired product **3a** in 70% yield (0.73 g) with 96% ee.

### Synthetic Transformations of **3a**

#### Sonogashira coupling

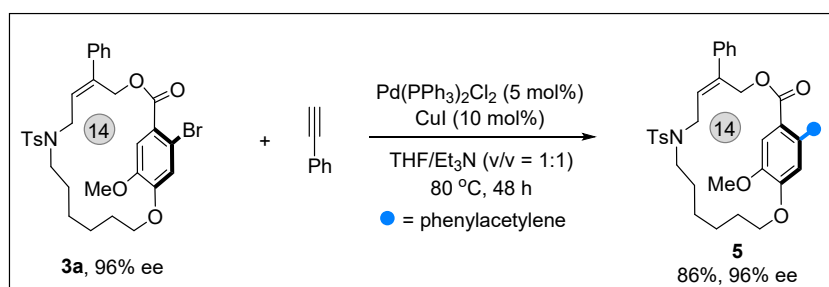

To a solution of **3a** (62.8 mg, 0.1 mmol) and ethynylbenzene (30.6 mg, 3.0 equiv) in THF/Et<sub>3</sub>N (v/v = 1:1, 2.0 mL) was added Pd(PPh<sub>3</sub>)<sub>2</sub>Cl<sub>2</sub> (3.5.0 mg, 5 mol%) and CuI (1.5 mg, 10 mol%). The flask was flushed with nitrogen gas. The resulting mixture was stirred at 80 °C for 48 h. Then the reaction mixture was concentrated and the residue was purified by a silica gel column chromatography to give **5** in 86% yield without compromising the ee values (96% ee).

**(R,Z)-1<sup>2</sup>-methoxy-12-phenyl-1<sup>5</sup>-(phenylethynyl)-9-tosyl-2,14-dioxa-9-aza-1(1,4)-benzenacyclopentadecaphan-11-en-15-one (5)**



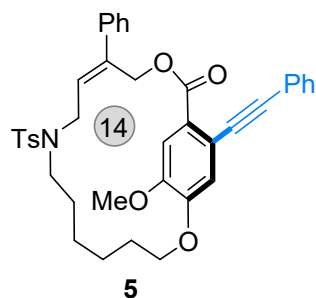

Following the above procedure, the crude product was purified by column chromatography on a silica gel to afford the product **5** (56.1 mg, 86% yield) as colorless oil.  $R_f$  (pentane:EtOAc = 4:1) = 0.30;  $^1\text{H NMR}$  (400 MHz, Chloroform-*d*)  $\delta$  7.67 (d,  $J$  = 8.2 Hz, 2H), 7.44 (s, 1H), 7.42 – 7.36 (m, 4H), 7.35 – 7.29 (m, 2H), 7.28 – 7.21 (m, 7H), 5.73 (t,  $J$  = 5.6 Hz, 1H), 5.36 (d,  $J$  = 13.3 Hz, 1H), 5.06 (d,  $J$  = 13.3 Hz, 1H), 4.41 (dddd,  $J$  = 18.0, 12.3, 8.9, 3.7 Hz, 2H), 4.15 (dd,  $J$  = 18.1, 5.4 Hz, 1H), 4.00 (dd,  $J$  = 18.1, 6.1 Hz, 1H), 3.94 (s, 3H), 3.08 (ddd,  $J$  = 15.1, 10.6, 5.0 Hz, 1H), 2.89 (ddd,  $J$  = 13.5, 11.1, 4.0 Hz, 1H), 2.42 (s, 3H), 1.85 – 1.73 (m, 1H), 1.67 – 1.52 (m, 1H), 1.38 – 1.18 (m, 1H), 1.13 – 0.99 (m, 1H), 0.89 – 0.72 (m, 4H).  $^{13}\text{C NMR}$  (100 MHz, Chloroform-*d*)  $\delta$  166.2, 151.4, 151.0, 143.1, 140.4, 137.7, 136.7, 131.5, 131.4, 129.6, 128.41, 128.35, 128.3, 127.7, 127.1, 126.4, 126.4, 123.7, 123.0, 116.3, 113.7, 93.0, 87.7, 70.0, 63.6, 56.2, 48.8, 46.4, 29.4, 29.1, 25.0, 24.9, 21.5; **HRMS** (ESI):  $m/z$ : calculated for  $\text{C}_{39}\text{H}_{40}\text{NO}_6\text{S}$ :  $[\text{M} + \text{H}]^+$  650.2571, found: 650.2578; HPLC (Chiralpak IF, *i*-propanol/hexane = 30/50, flow rate 0.8 mL/min,  $\lambda$  = 254 nm):  $t_R$  (major) = 31.4 min,  $t_R$  (minor) = 28.1 min, 96% ee;  $[\alpha]_D^{25} = -63.8$  ( $c$  = 0.2,  $\text{CHCl}_3$ ).

### Expoidation

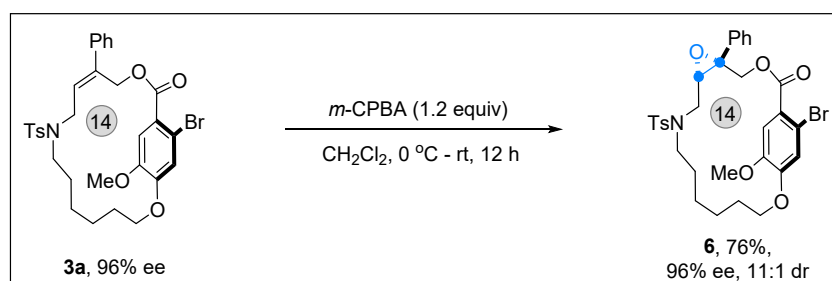

A solution of **3a** (62.8 mg, 0.1 mmol, 1.0 equiv.) in dichloromethane (2 mL) was cooled by an ice bath and added *m*-CPBA (34.5 mg, 70% w/w, 0.15 mmol, 2.0 equiv) portion wise. The reaction mixture was allowed to warm to room temperature slowly

and stir for 12 h. The reaction was then quenched with saturated  $\text{Na}_2\text{S}_2\text{O}_3$  solution. The organic phase was filtered and the solvent was removed by rotary evaporation. The residue was purified by a silica gel flash chromatography (pentane/ $\text{CH}_2\text{Cl}_2$  = 2:1) to afford the desired product **6** (48.8 mg, 76%, 96% ee, 11:1 dr).

**5<sup>2</sup>-bromo-5<sup>5</sup>-methoxy-1<sup>2</sup>-phenyl-13-tosyl-3,6-dioxa-13-aza-1(2,3)-oxirana-5(1,4)-benzenacyclotetradecaphan-4-one (6)**

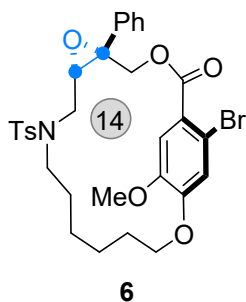

Following the above procedure, the crude product was purified by column chromatography on a silica gel to afford the product **6** (48.8 mg, 76% yield) as colorless oil.  $R_f$  (pentane/ $\text{CH}_2\text{Cl}_2$  = 2:1) = 0.30;  $^1\text{H NMR}$  (400 MHz, Chloroform-*d*)  $\delta$  7.72 (d,  $J$  = 8.3 Hz, 2H), 7.41 – 7.35 (m, 6H), 7.30 (d,  $J$  = 8.2 Hz, 2H), 7.23 (s, 1H), 5.18 (d,  $J$  = 12.6 Hz, 1H), 4.70 (d,  $J$  = 12.7 Hz, 1H), 4.39 – 4.29 (m, 2H), 4.05 (d,  $J$  = 16.0 Hz, 1H), 3.93 (s, 3H), 3.22 – 3.04 (m, 3H), 2.90 (ddd,  $J$  = 14.5, 9.5, 4.9 Hz, 1H), 2.43 (s, 3H), 1.63 (q,  $J$  = 6.0 Hz, 2H), 1.35 – 1.19 (m, 1H), 1.06 (dd,  $J$  = 14.2, 6.7 Hz, 1H), 0.95 – 0.76 (m, 3H), 0.76 – 0.56 (m, 1H).  $^{13}\text{C NMR}$  (100 MHz, Chloroform-*d*)  $\delta$  165.7, 151.3, 150.0, 143.3, 137.8, 137.6, 129.7, 128.6, 128.5, 127.1, 126.0, 125.8, 123.7, 115.5, 111.1, 69.9, 64.1, 61.9, 60.6, 56.3, 49.0, 46.0, 28.1, 27.8, 24.9, 24.8, 21.5; **HRMS** (ESI):  $m/z$ : calculated for  $\text{C}_{31}\text{H}_{35}\text{BrNO}_7\text{S}$ :  $[\text{M} + \text{H}]^+$  644.1313, found: 644.1322; HPLC (Chiralpak IF, *i*-propanol/hexane = 38/42, flow rate 0.8 mL/min,  $\lambda$  = 254 nm):  $t_R$  (major) = 31.8 min,  $t_R$  (minor) = 22.4 min, 98% ee;  $[\alpha]^{25}_D$  = - 46.2 ( $c$  = 0.2,  $\text{CHCl}_3$ ).

## Control Experiments

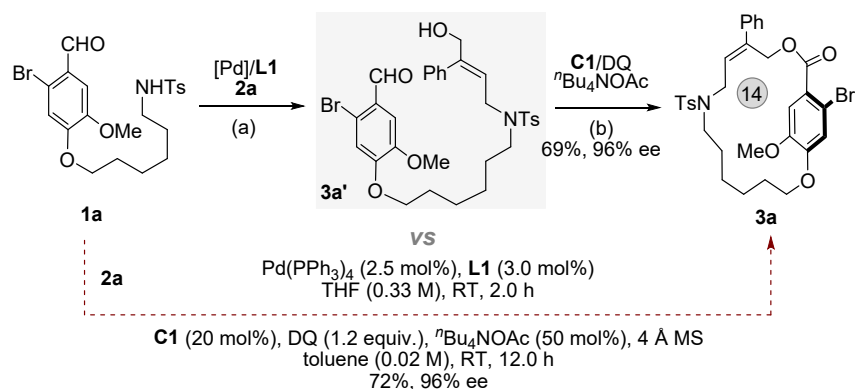

To a flame-dried Schlenk reaction tube equipped with a magnetic stir bar, was added the catalyst  $Pd(PPh_3)_4$  (2.9 mg, 0.025 mmol), **L1** (1.3 mg, 0.03 mmol), toluene (1.0 mL) was added. The mixture was then stirred at room temperature for 0.5 h. After that, **1a** (48.4 mg, 0.1 mmol) and **2a** (28.5 mg, 0.15 mmol) were added sequentially under Ar. The reaction mixture was then stirred at room temperature for 2 h. Then the mixture was purified by a silica gel flash chromatography (pentane/EtOAc = 2:1) directly to afford the desired product **3a'** (60.5 mg, 96%).

To a solution of pre-NHC catalyst **C1** (20 mol%),  $^tBu_4NOAc$  (50 mol%), DQ (0.12 mmol) and 4 Å MS 50 mg in toluene (4.0 mL), the obtained **3a'** (60.5 mg) was added and stirred at room temperature for another 12 h (monitored by TLC). After the reaction was completed, the reaction mixture was filtered and concentrated. The residue was purified by a silica gel flash chromatography (Hexane/EtOAc = 5:1) to afford the desired product **3a** in 72% yield (43.2 mg) in total and with 96% ee.

**(E)-N-(6-(5-bromo-4-formyl-2-methoxyphenoxy)hexyl)-N-(4-hydroxy-3-phenylbut-2-en-1-yl)-4-methylbenzenesulfonamide (**3a'**)**

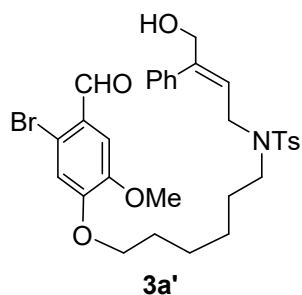

Following the above procedure, the crude product was purified by column chromatography on a silica gel to afford the product **3a'** (60.5 mg, 96% yield) as colorless oil.  $R_f$  (pentane/EtOAc = 2:1) = 0.20;  $^1H$  NMR (400 MHz, Chloroform- $d$ )  $\delta$

10.20 (s, 1H), 7.73 (d,  $J = 8.0$  Hz, 2H), 7.42 (s, 1H), 7.37 – 7.29 (m, 7H), 7.04 (s, 1H), 5.71 (t,  $J = 7.1$  Hz, 1H), 4.57 (s, 2H), 4.09 (d,  $J = 7.1$  Hz, 2H), 4.05 (t,  $J = 6.6$  Hz, 2H), 3.90 (s, 3H), 3.22 (t,  $J = 7.4$  Hz, 2H), 2.43 (s, 3H), 1.87 (p,  $J = 6.8$  Hz, 2H), 1.66 (p,  $J = 7.4$  Hz, 2H), 1.50 (dt,  $J = 14.7, 7.0$  Hz, 2H), 1.42 (dd,  $J = 14.5, 7.6$  Hz, 2H), 1.28 (t,  $J = 7.1$  Hz, 1H).  $^{13}\text{C}$  NMR (100 MHz, Chloroform- $d$ )  $\delta$  190.8, 154.2, 149.1, 143.3, 141.9, 140.1, 137.0, 129.7, 128.5, 127.8, 127.2, 126.3, 126.3, 126.2, 120.4, 116.3, 110.7, 69.3, 59.6, 56.1, 48.2, 45.7, 28.7, 28.5, 26.3, 25.5, 21.5; HRMS (ESI):  $m/z$ : calculated for  $\text{C}_{31}\text{H}_{37}\text{BrNO}_6\text{S}$ :  $[\text{M} + \text{H}]^+$  630.1520, found: 630.1526.

## Mechanistic Studies

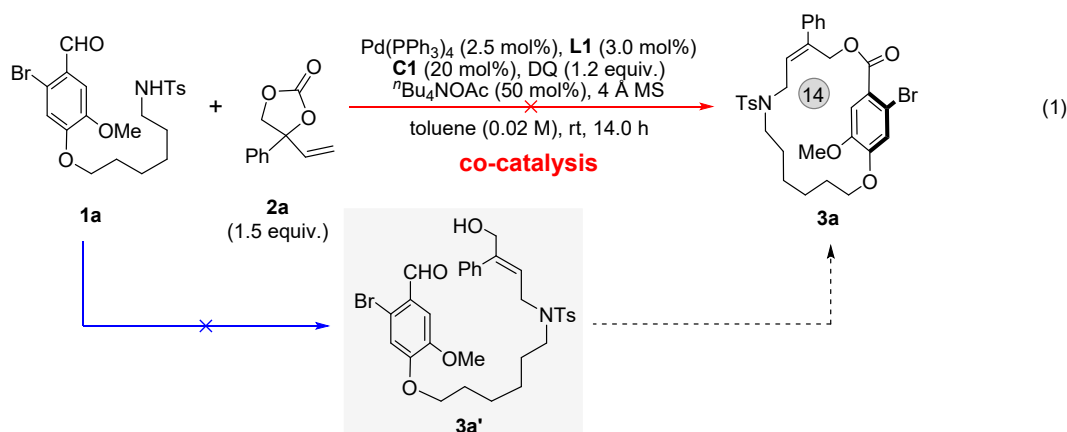

The result of equation (1) indicates that the co-catalytic process is impermissible, and the Pd-catalyzed process is prohibited by some factor. Therefore, control experiments were performed as bellow.

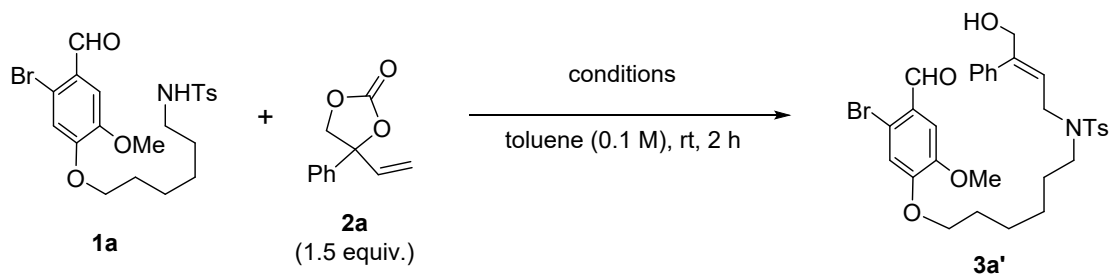

| entry | conditions                                                                                                        | yield (%) |
|-------|-------------------------------------------------------------------------------------------------------------------|-----------|
| 1     | $\text{Pd}(\text{PPh}_3)_4$ (2.5 mol%), <b>L1</b> (3 mol%)                                                        | 96        |
| 2     | $\text{Pd}(\text{PPh}_3)_4$ (2.5 mol%), <b>L1</b> (3 mol%), DQ (1.2 equiv.)                                       | 92        |
| 3     | $\text{Pd}(\text{PPh}_3)_4$ (2.5 mol%), <b>L1</b> (3 mol%), DQ (1.2 equiv.), $^t\text{Bu}_4\text{NOAc}$ (50 mol%) | 93        |

|   |                                                                                                                                       |            |
|---|---------------------------------------------------------------------------------------------------------------------------------------|------------|
| 4 | Pd(PPh <sub>3</sub> ) <sub>4</sub> (2.5 mol%), L1 (3 mol%), DQ (1.2 equiv.), <sup>n</sup> Bu <sub>4</sub> NOAc (50 mol%), C1 (20 mol) | no product |
| 5 | Pd(PPh <sub>3</sub> ) <sub>4</sub> (2.5 mol%), <sup>n</sup> Bu <sub>4</sub> NOAc (50 mol%), C1 (20 mol)                               | no product |

Above results shows that the **C1** affects the Pd-catalyzed process. **According the literature,<sup>6</sup> the probable reason is that there are formed a stable complex between generated free carbebe and palladium, which is consistent with the nature of the strong coordination between palladium and free carbene.**

### Crystal Structure of **3q**

Single crystals of **3q** (50 mg) were grown in CH<sub>2</sub>Cl<sub>2</sub>/hexane = 10:1 (1.5 mL). The 1.5 mL vial was capped and placed at room temperature in the experimental cabinet for 5 days, whereupon crystals formed. A clear light colorless block shaped crystal of **3q** was used for the X-ray crystallographic analysis. The X-ray intensity data were measured at 173 K, on an AtlasS2 diffractometer. The crystal data of **3q** have been deposited in CCDC and have been displayed at 50% ellipsoid contour probability level.

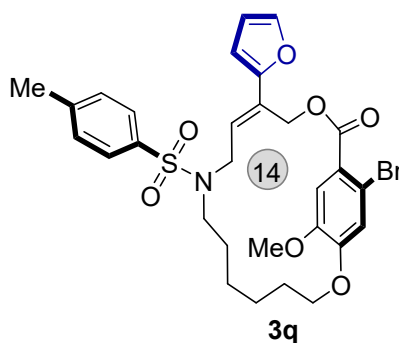

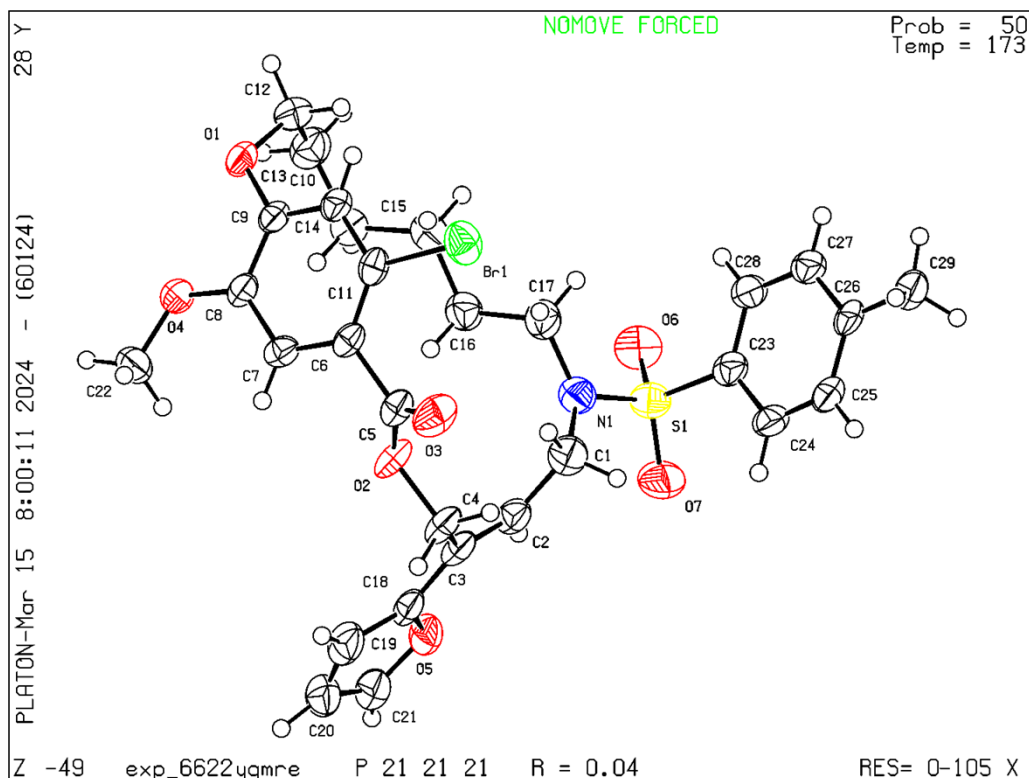

### Crystal data and structure refinement for exp\_6622YGMre

|                                           |                                          |
|-------------------------------------------|------------------------------------------|
| Identification code                       | exp_6622YGMre                            |
| Empirical formula                         | $C_{29}H_{32}BrNO_7S$                    |
| Formula weight                            | 618.53                                   |
| Temperature / K                           | 172.99(10)                               |
| Crystal system                            | orthorhombic                             |
| Space group                               | $P2_12_12_1$                             |
| a / Å, b / Å, c / Å                       | 9.65444(8), 11.52287(10), 25.33694(19)   |
| $\alpha^\circ, \beta^\circ, \gamma^\circ$ | 90.00, 90.00, 90.00                      |
| Volume / Å <sup>3</sup>                   | 2818.65(4)                               |
| Z                                         | 4                                        |
| $\rho_{\text{calc}} / \text{mg mm}^{-3}$  | 1.458                                    |
| $\mu / \text{mm}^{-1}$                    | 3.079                                    |
| F(000)                                    | 1280                                     |
| Crystal size / mm <sup>3</sup>            | 0.2 × 0.1 × 0.1                          |
| 2 $\theta$ range for data collection      | 6.98 to 133.48°                          |
| Index ranges                              | -11 ≤ h ≤ 11, -13 ≤ k ≤ 13, -30 ≤ l ≤ 30 |
| Reflections collected                     | 80404                                    |
| Independent reflections                   | 4948[R(int) = 0.1334]                    |
| Data/restraints/parameters                | 4948/0/355                               |

---

|                                                                |                                  |
|----------------------------------------------------------------|----------------------------------|
| Goodness-of-fit on $F^2$                                       | 1.082                            |
| Final R indexes [ $I > 2\sigma(I)$ i.e. $F_o > 4\sigma(F_o)$ ] | $R_1 = 0.0447$ , $wR_2 = 0.1203$ |
| Final R indexes [all data]                                     | $R_1 = 0.0448$ , $wR_2 = 0.1204$ |
| Largest diff. peak/hole / $e \text{ \AA}^{-3}$                 | 0.673/-0.583                     |
| Flack Parameters                                               | -0.003(18)                       |
| Completeness                                                   | 0.9851                           |

---

# NMR Spectra

## <sup>1</sup>H NMR (400 MHz, CDCl<sub>3</sub>) spectra of 1a

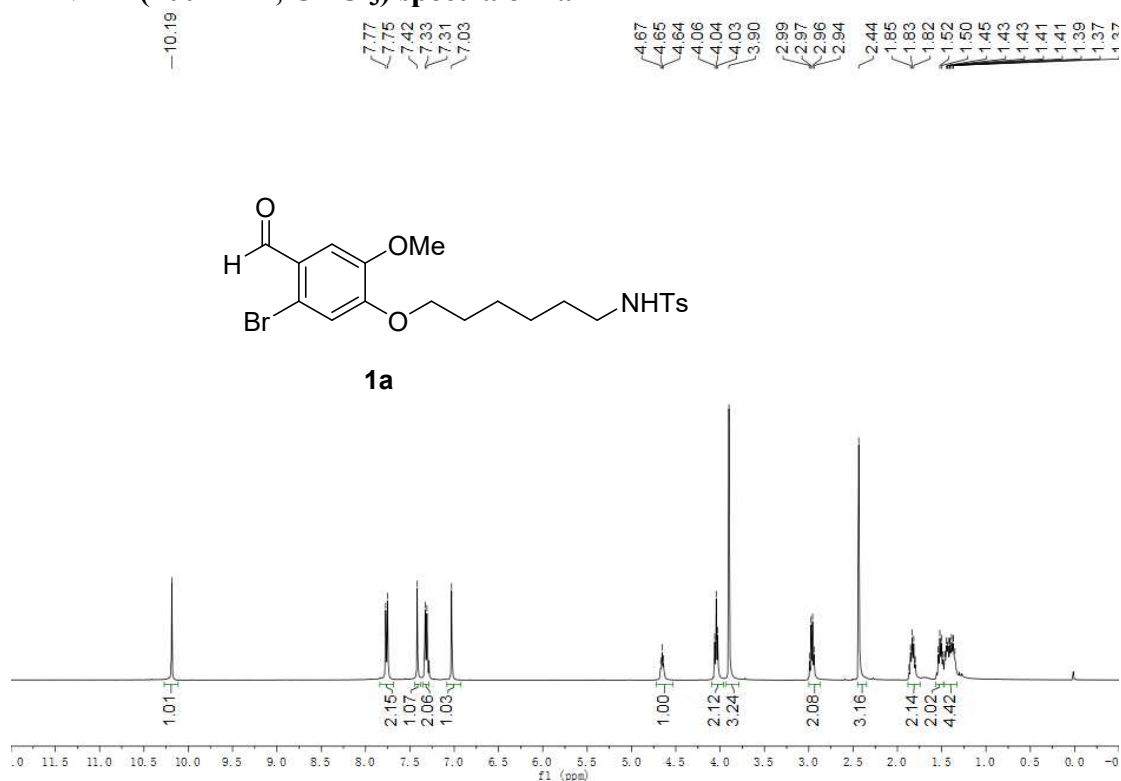

## <sup>13</sup>C NMR (100 MHz, CDCl<sub>3</sub>) spectra of 1a

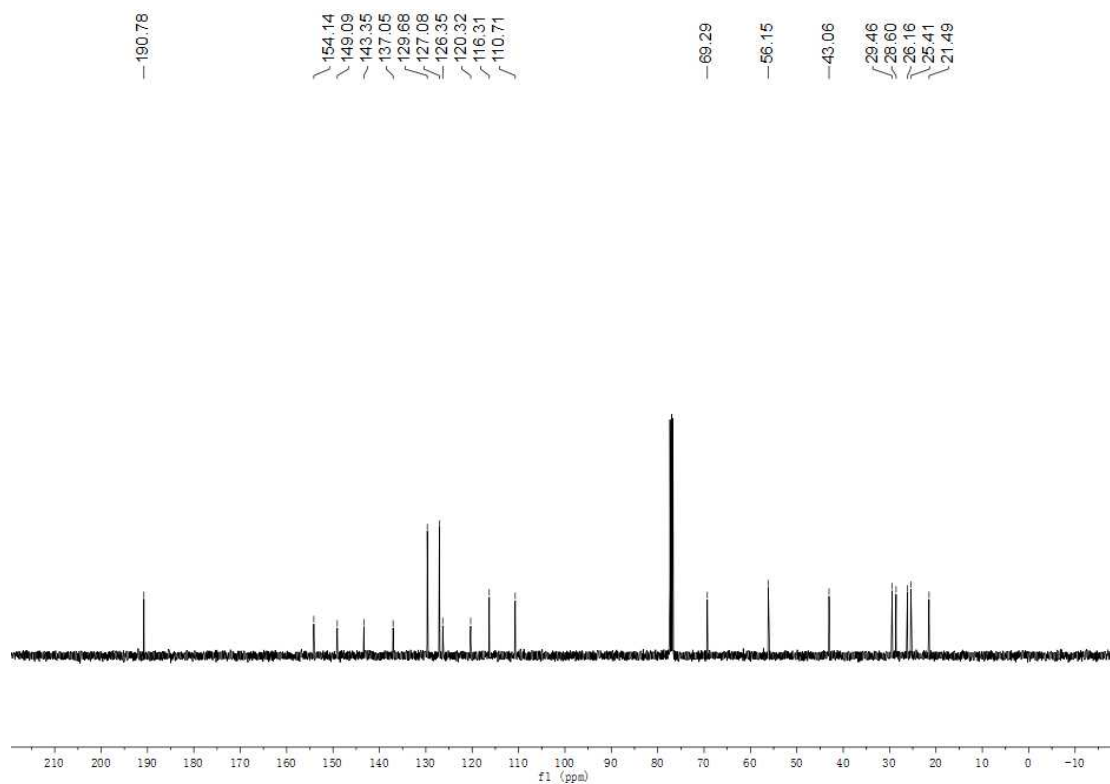



### <sup>1</sup>H NMR (400 MHz, CDCl<sub>3</sub>) spectra of 1b

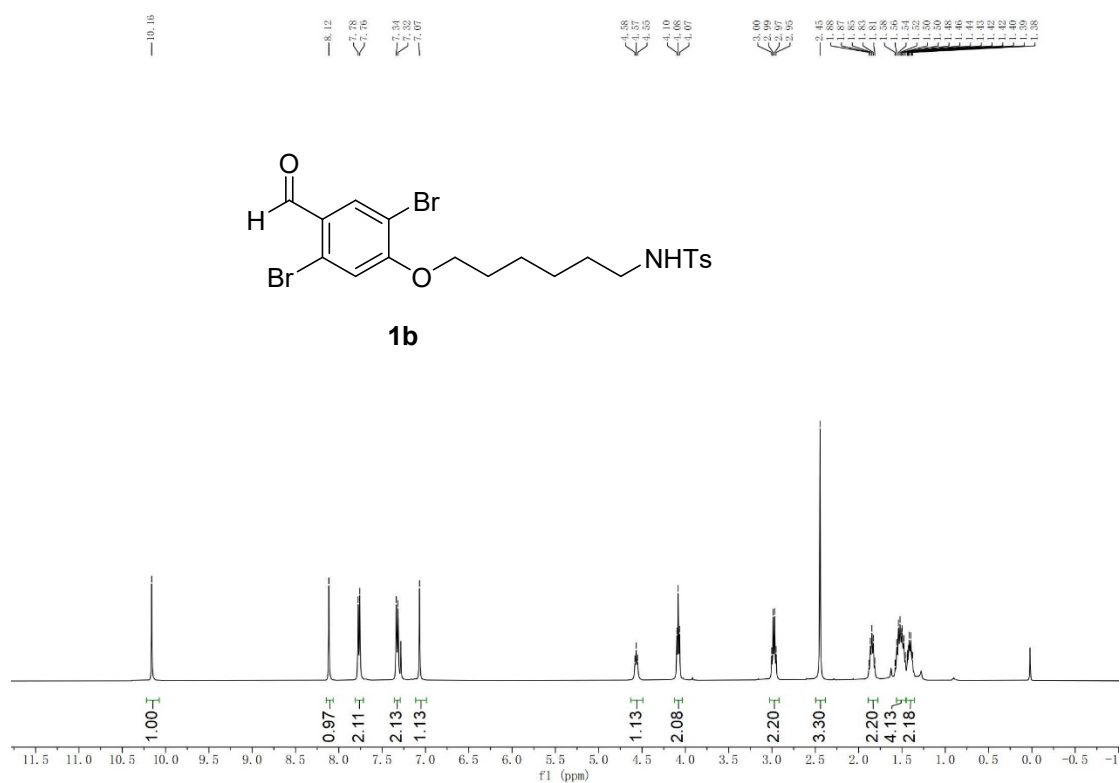

### <sup>13</sup>C NMR (100 MHz, CDCl<sub>3</sub>) spectra of 1b

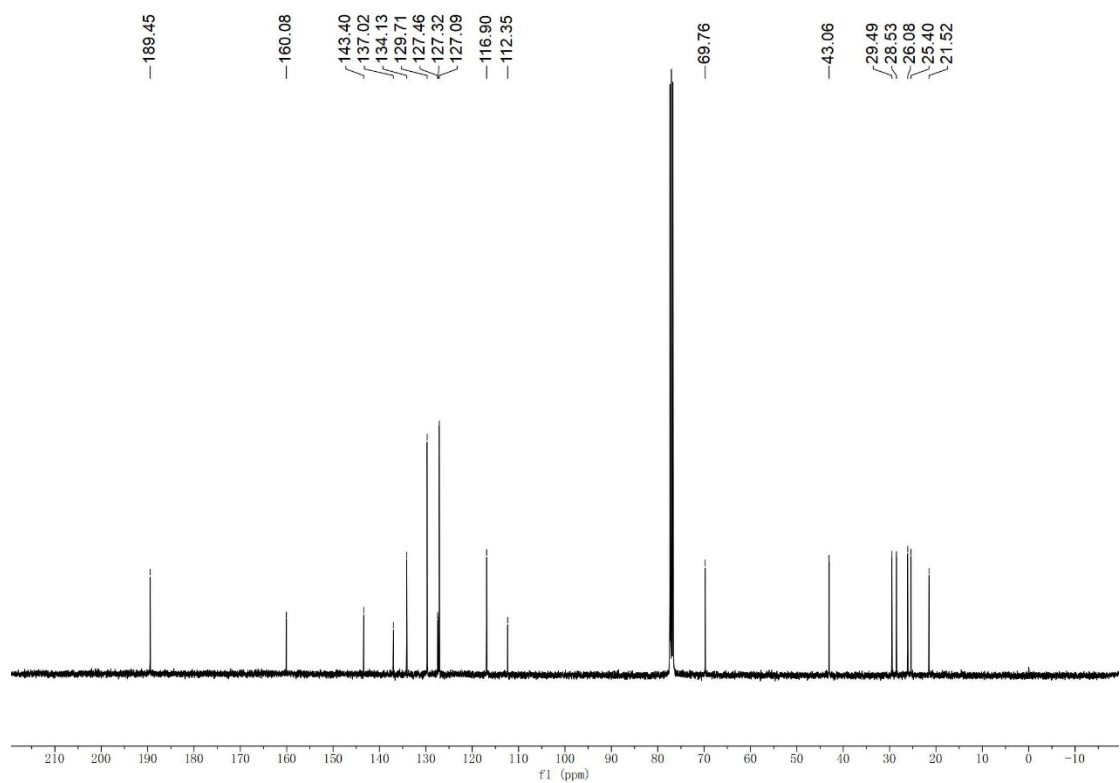

### <sup>1</sup>H NMR (400 MHz, CDCl<sub>3</sub>) spectra of 1c

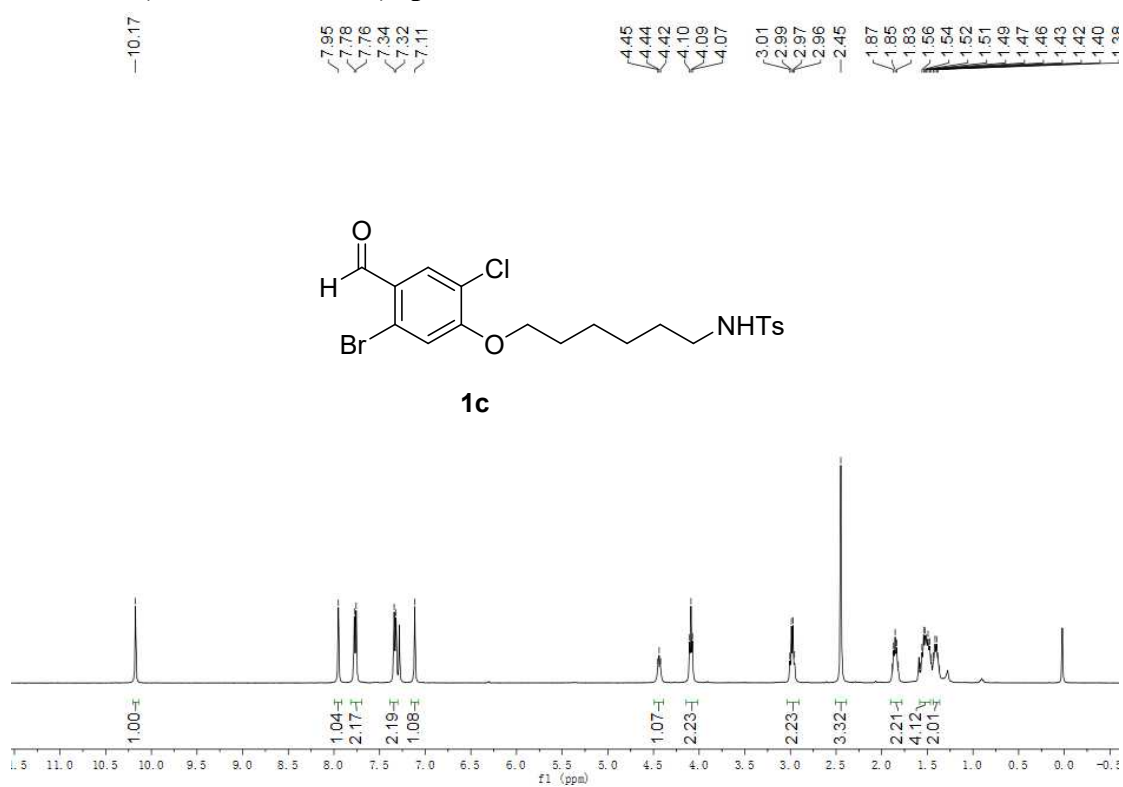

### <sup>13</sup>C NMR (100 MHz, CDCl<sub>3</sub>) spectra of 1c

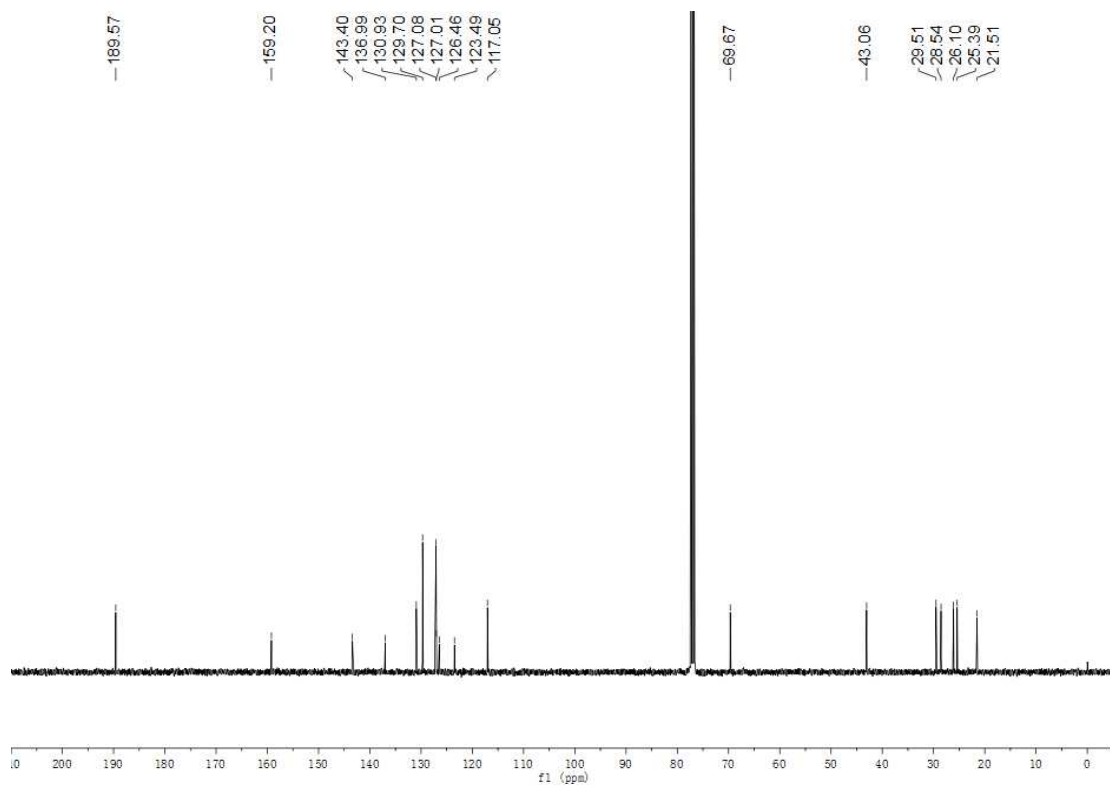

### <sup>1</sup>H NMR (400 MHz, CDCl<sub>3</sub>) spectra of 1d

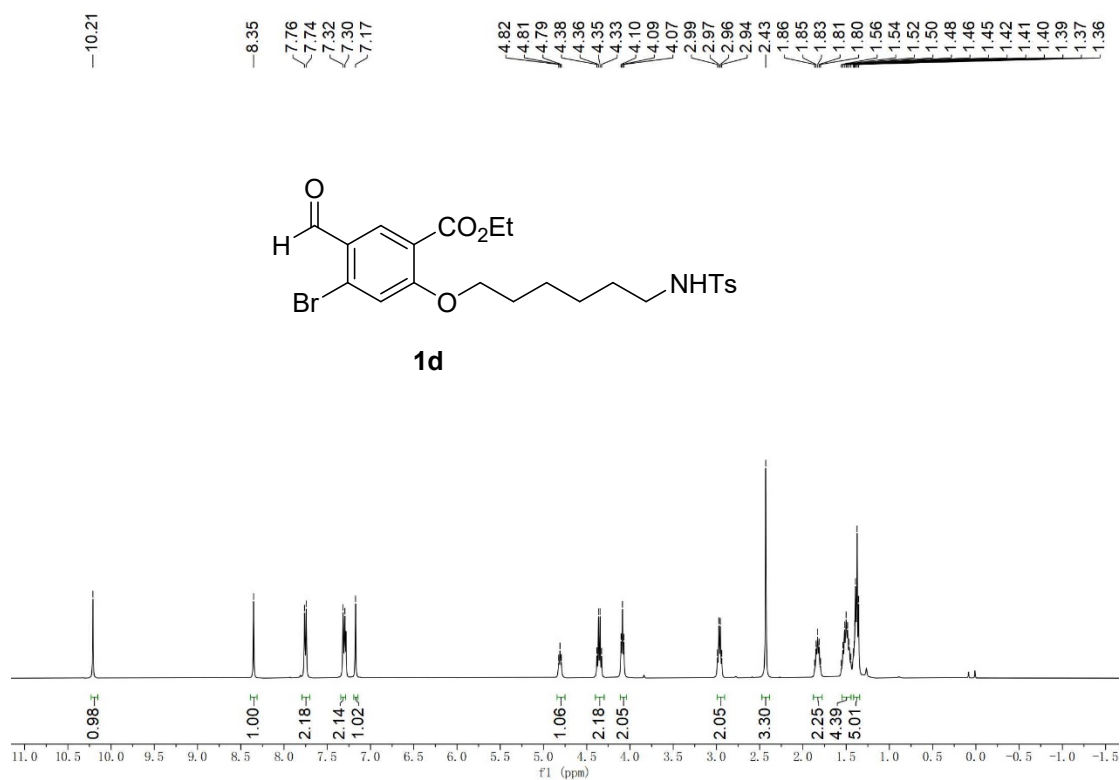

### <sup>13</sup>C NMR (100 MHz, CDCl<sub>3</sub>) spectra of 1d

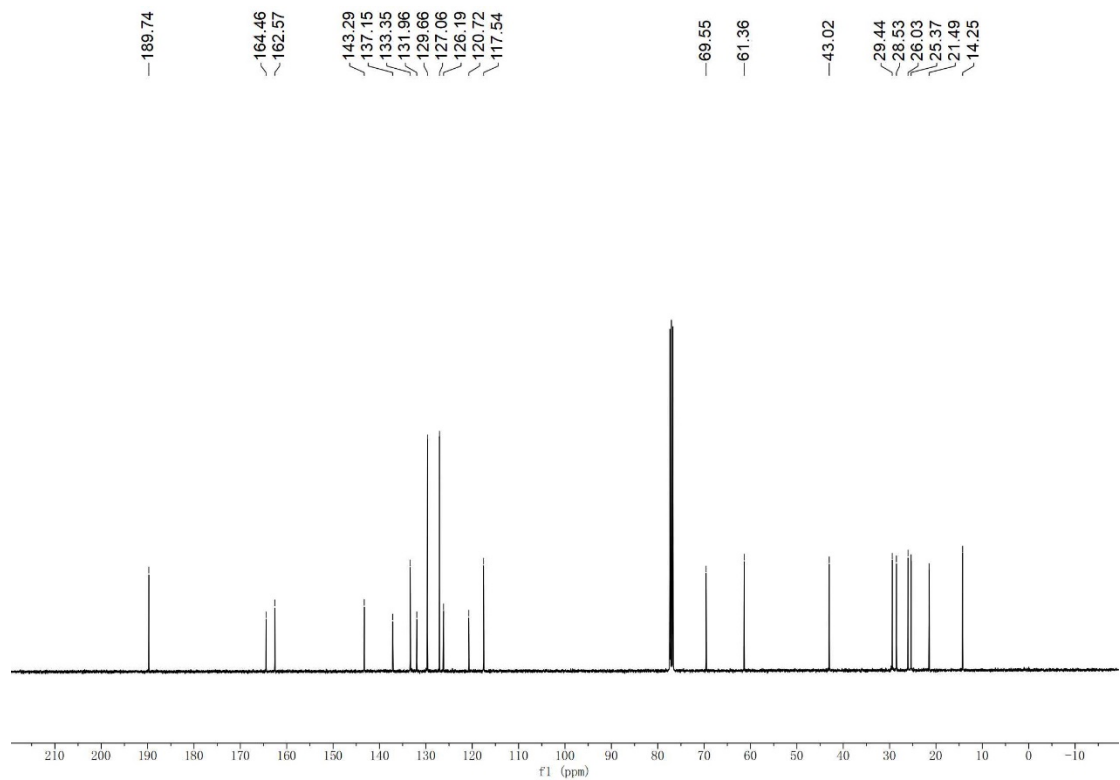

### <sup>1</sup>H NMR (400 MHz, CDCl<sub>3</sub>) spectra of 1e

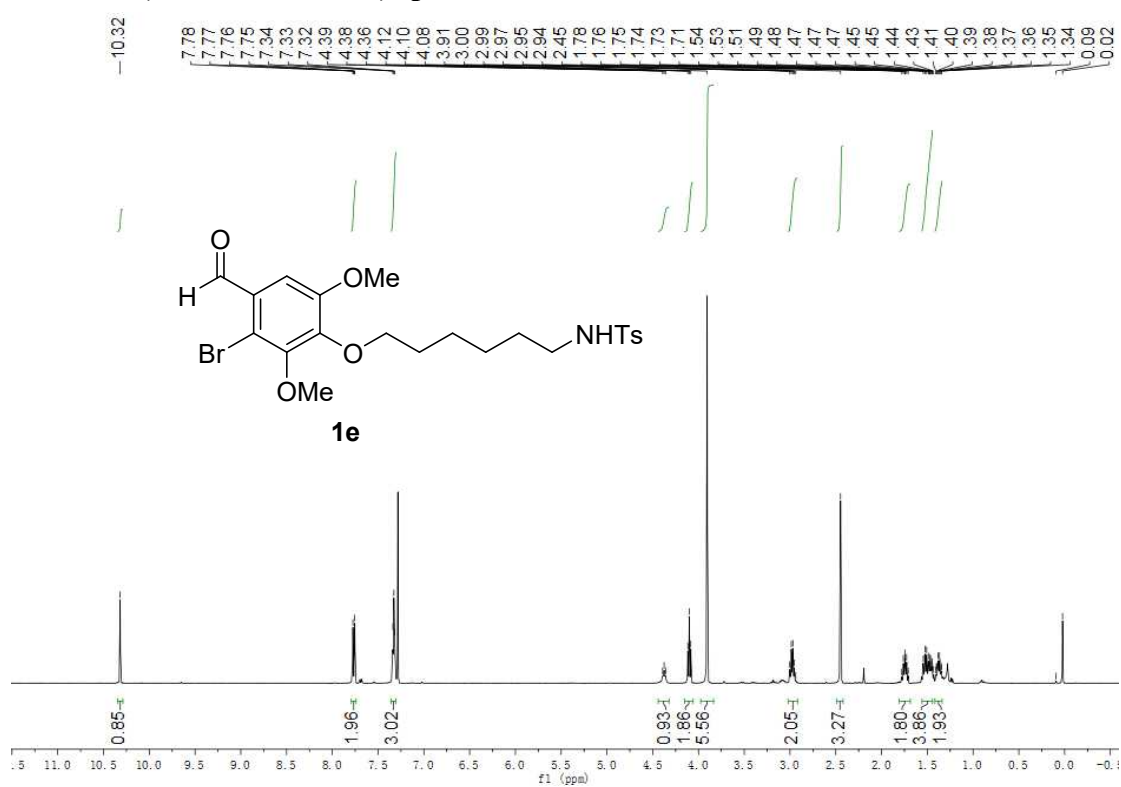

### <sup>13</sup>C NMR (100 MHz, CDCl<sub>3</sub>) spectra of 1e

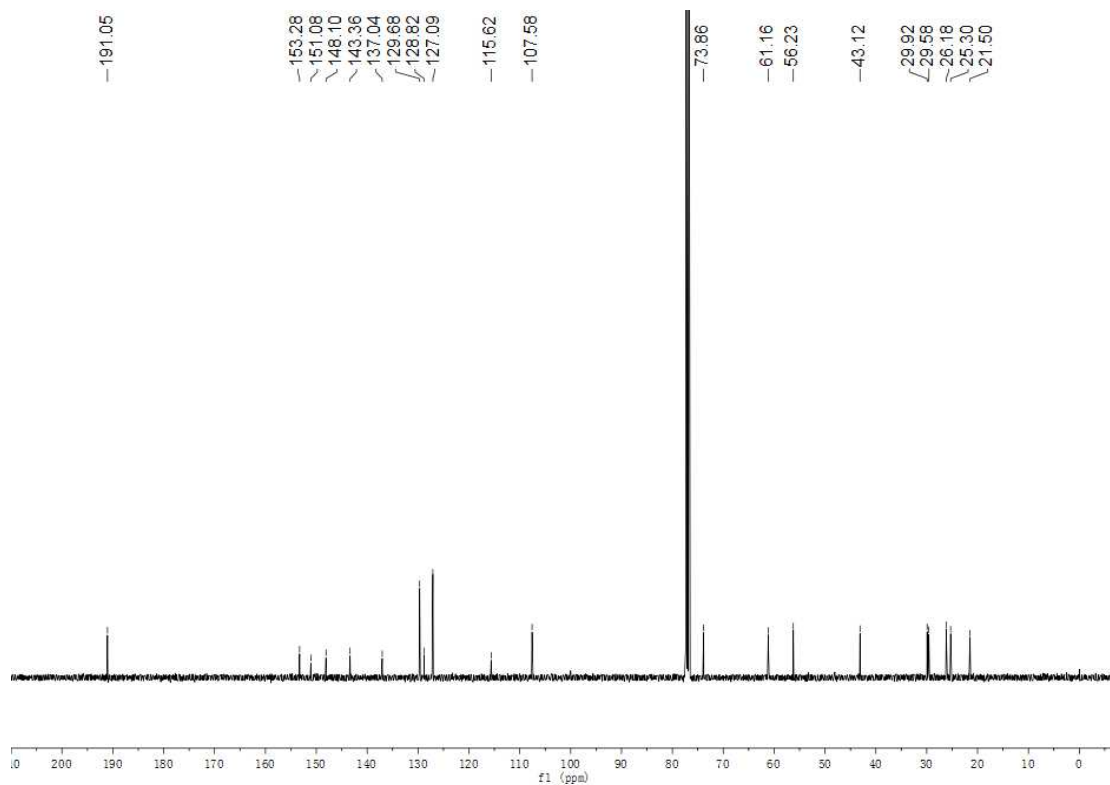

### <sup>1</sup>H NMR (400 MHz, CDCl<sub>3</sub>) spectra of 1f

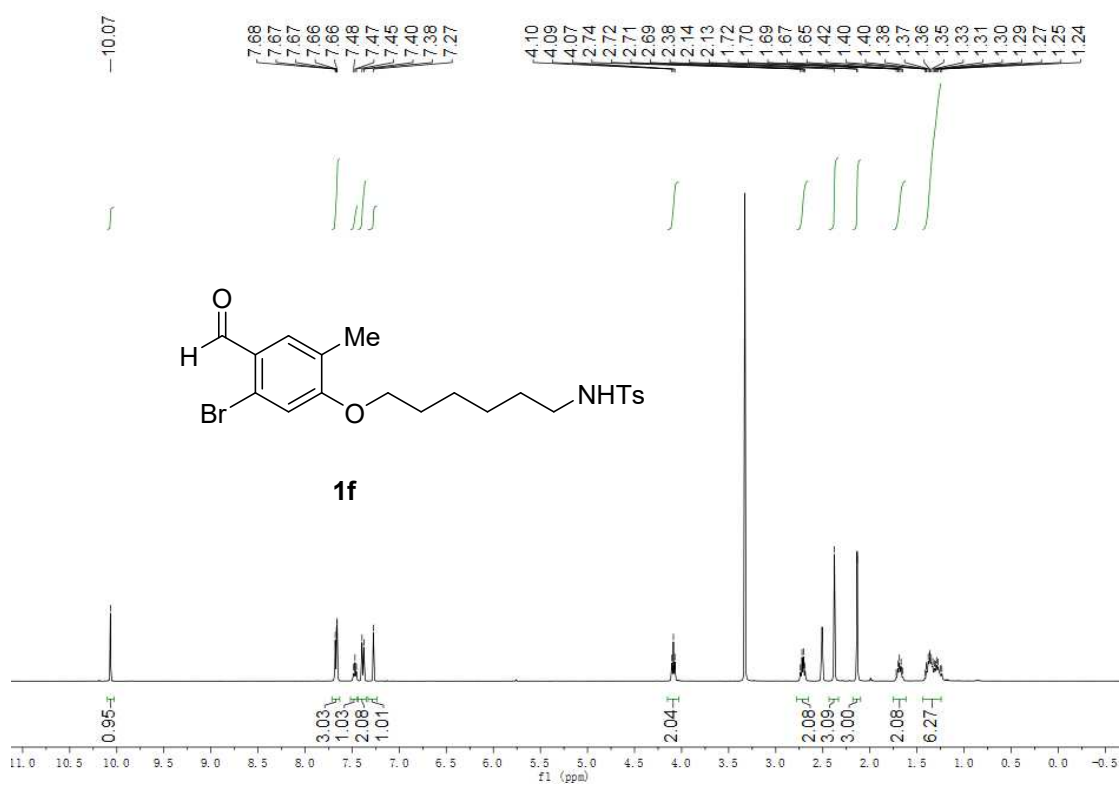

### <sup>13</sup>C NMR (100 MHz, CDCl<sub>3</sub>) spectra of 1f

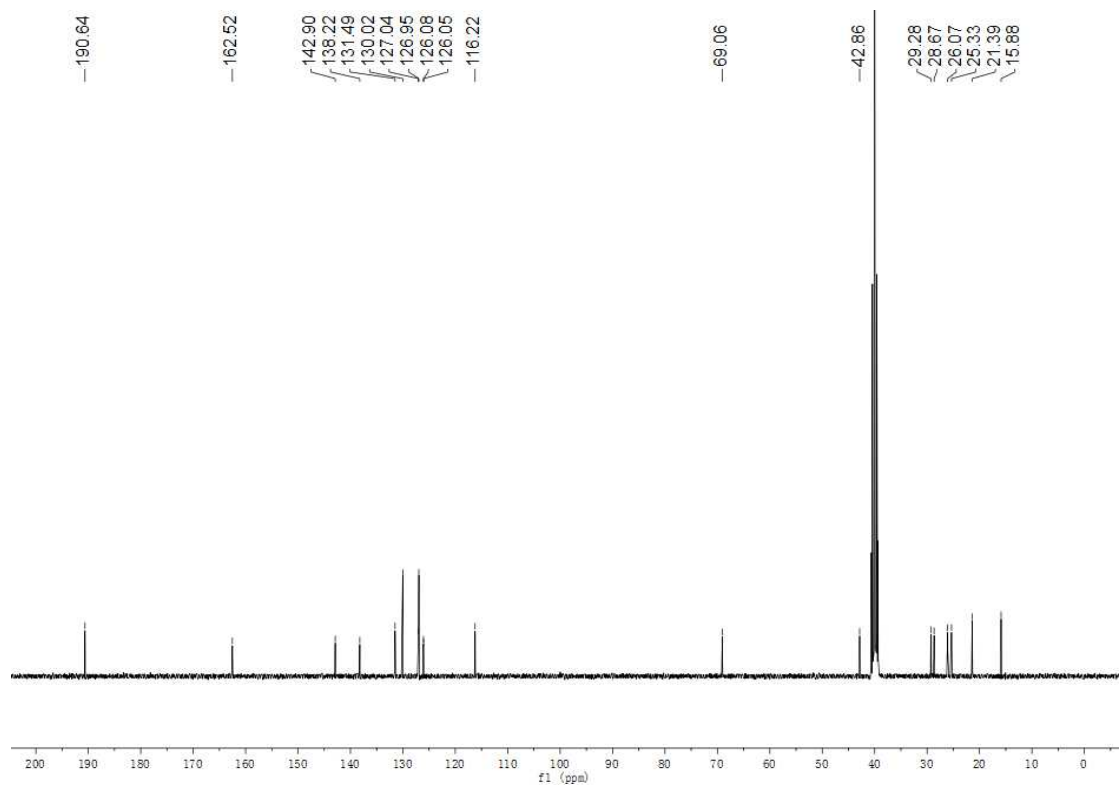

### <sup>1</sup>H NMR (400 MHz, CDCl<sub>3</sub>) spectra of 1g

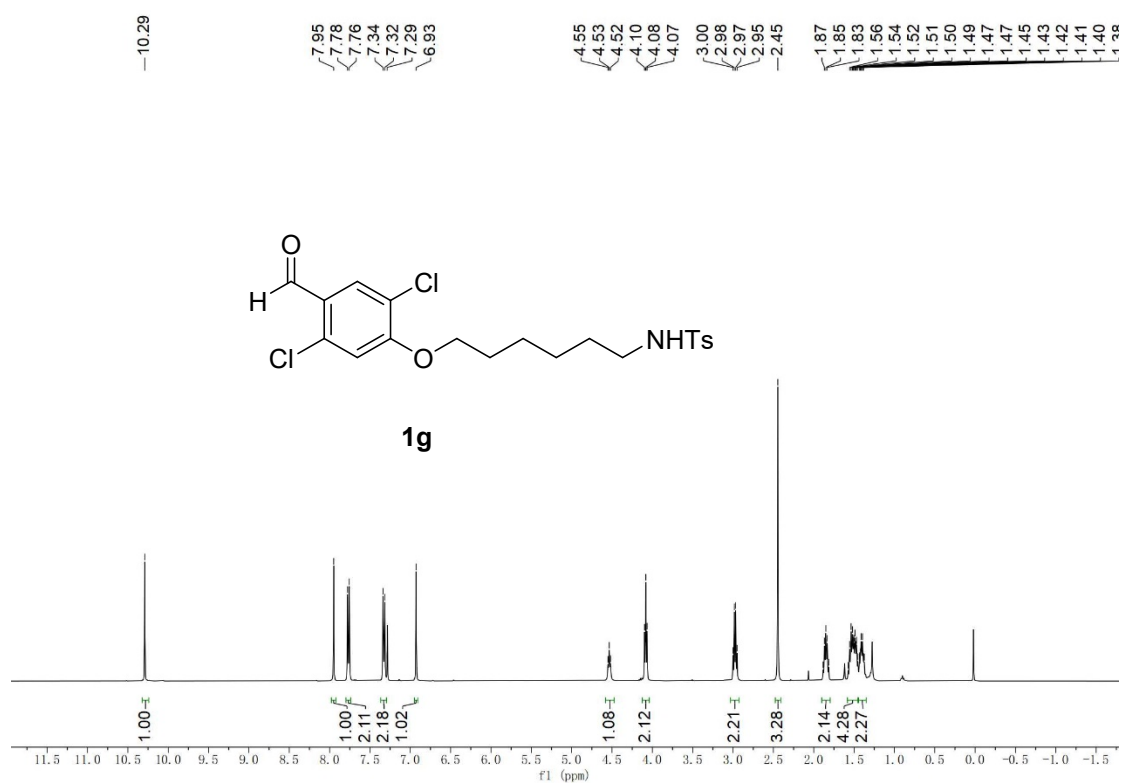

### <sup>13</sup>C NMR (100 MHz, CDCl<sub>3</sub>) spectra of 1g

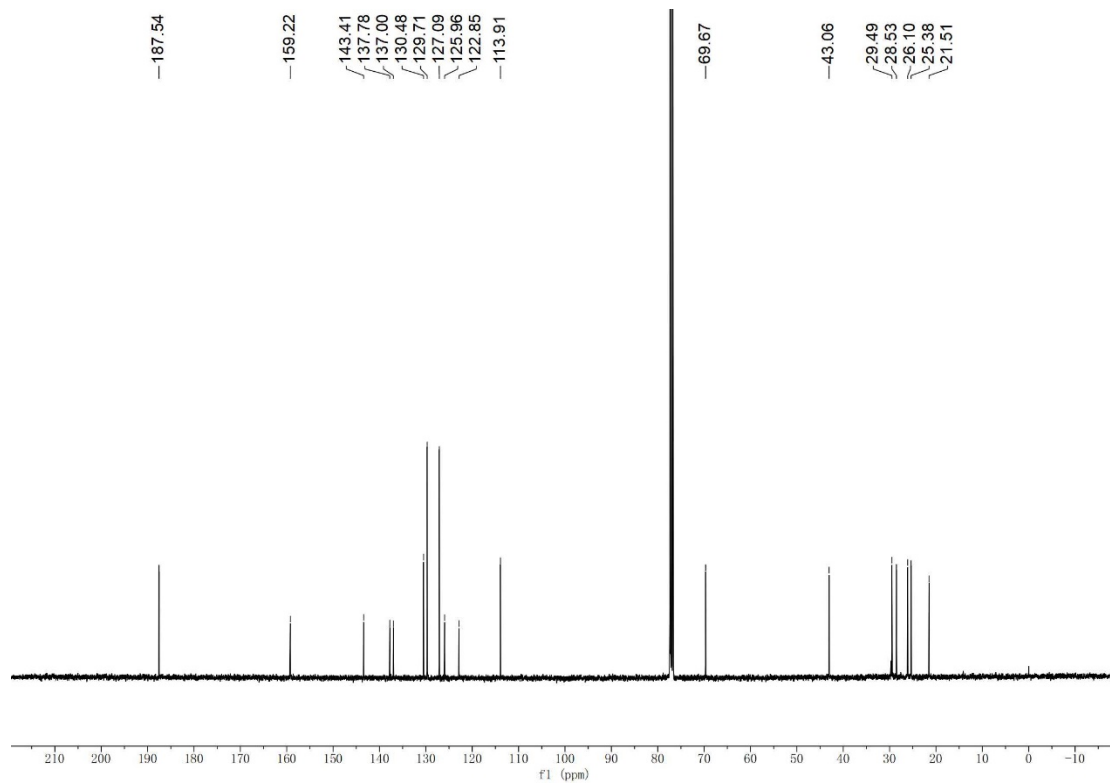

### <sup>1</sup>H NMR (400 MHz, CDCl<sub>3</sub>) spectra of 1h

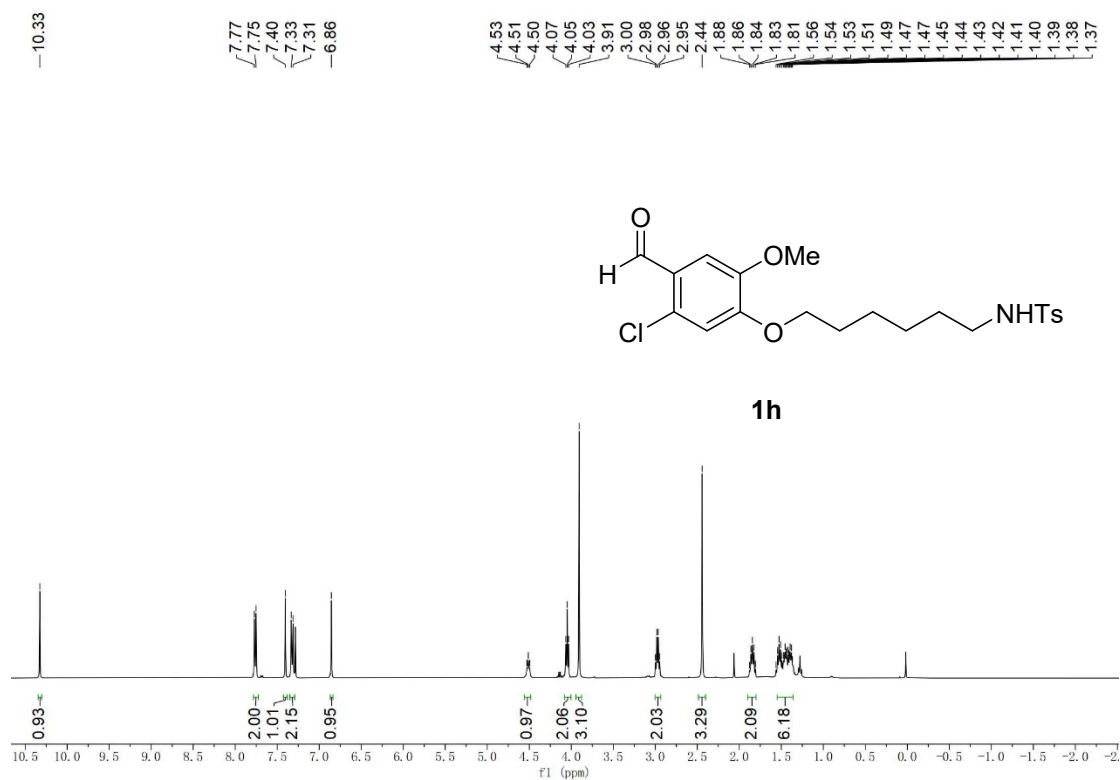

### <sup>13</sup>C NMR (100 MHz, CDCl<sub>3</sub>) spectra of 1h

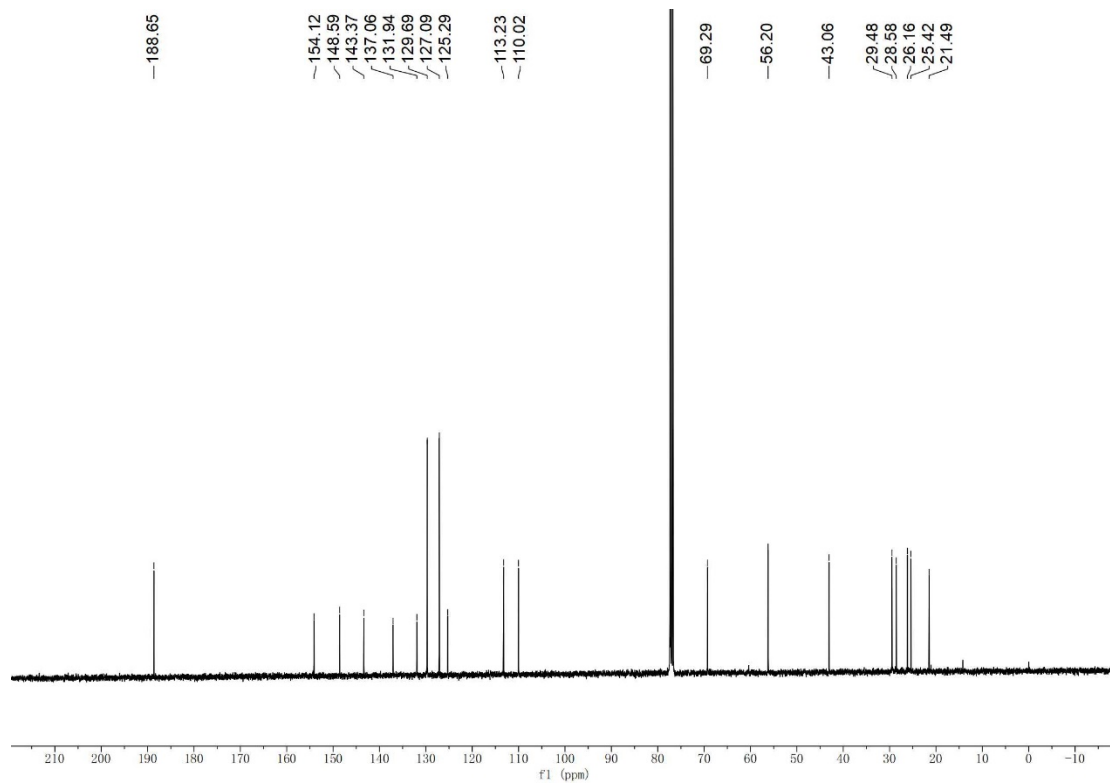

### <sup>1</sup>H NMR (400 MHz, CDCl<sub>3</sub>) spectra of 1i

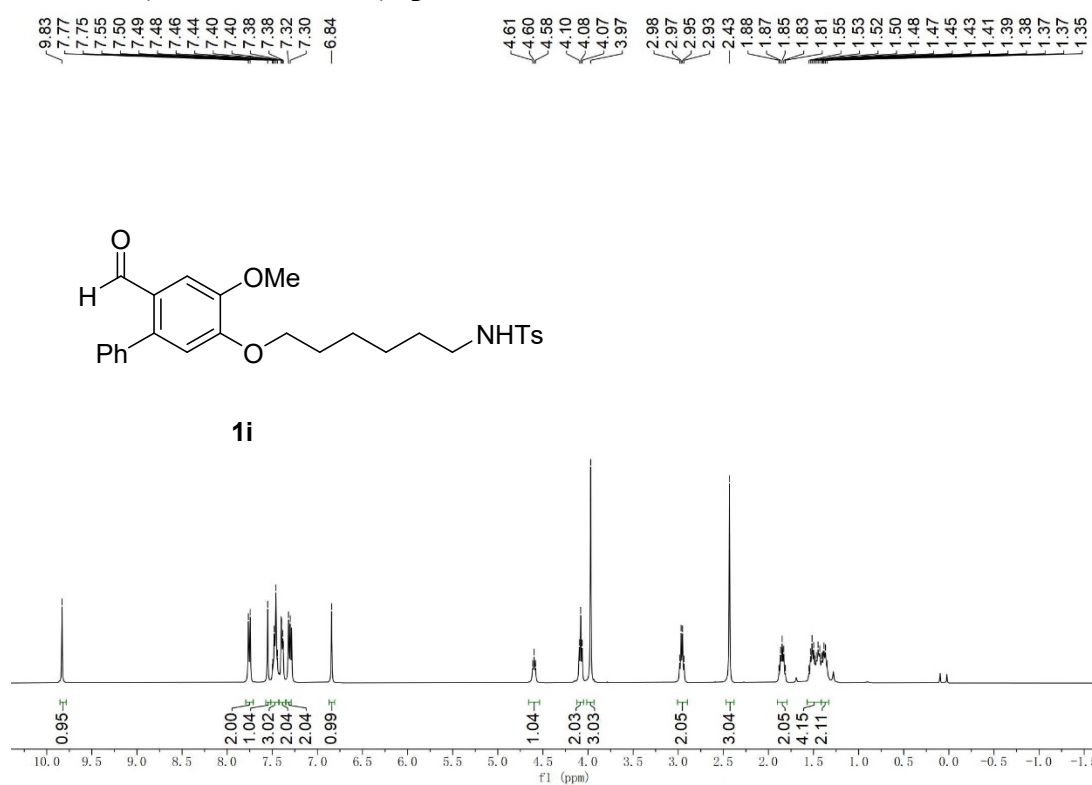

### <sup>13</sup>C NMR (100 MHz, CDCl<sub>3</sub>) spectra of 1i

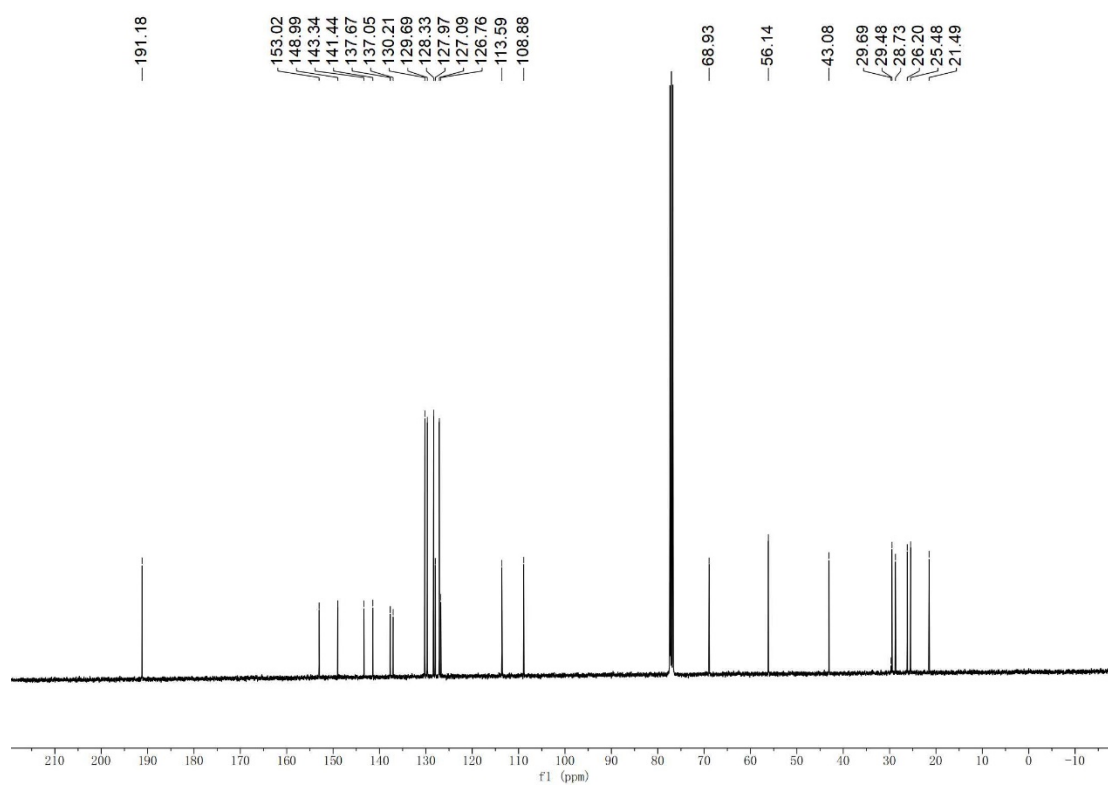



### <sup>1</sup>H NMR (400 MHz, CDCl<sub>3</sub>) spectra of 1j

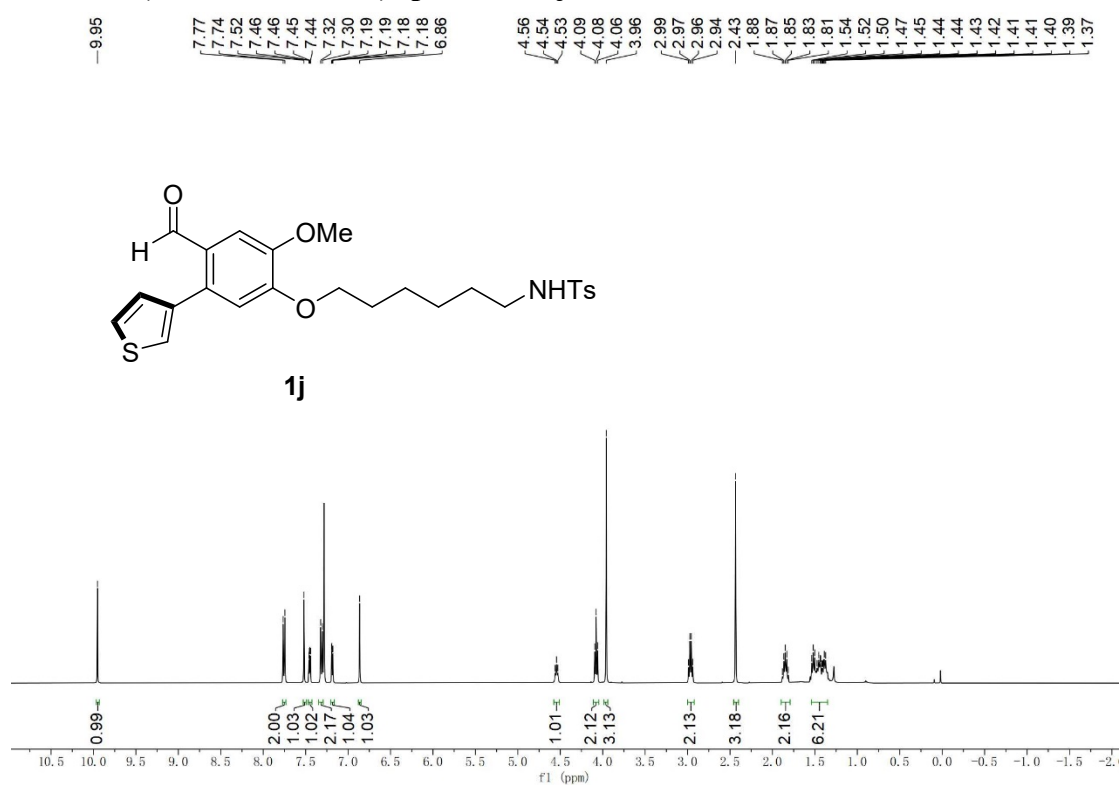

### <sup>13</sup>C NMR (100 MHz, CDCl<sub>3</sub>) spectra of 1j

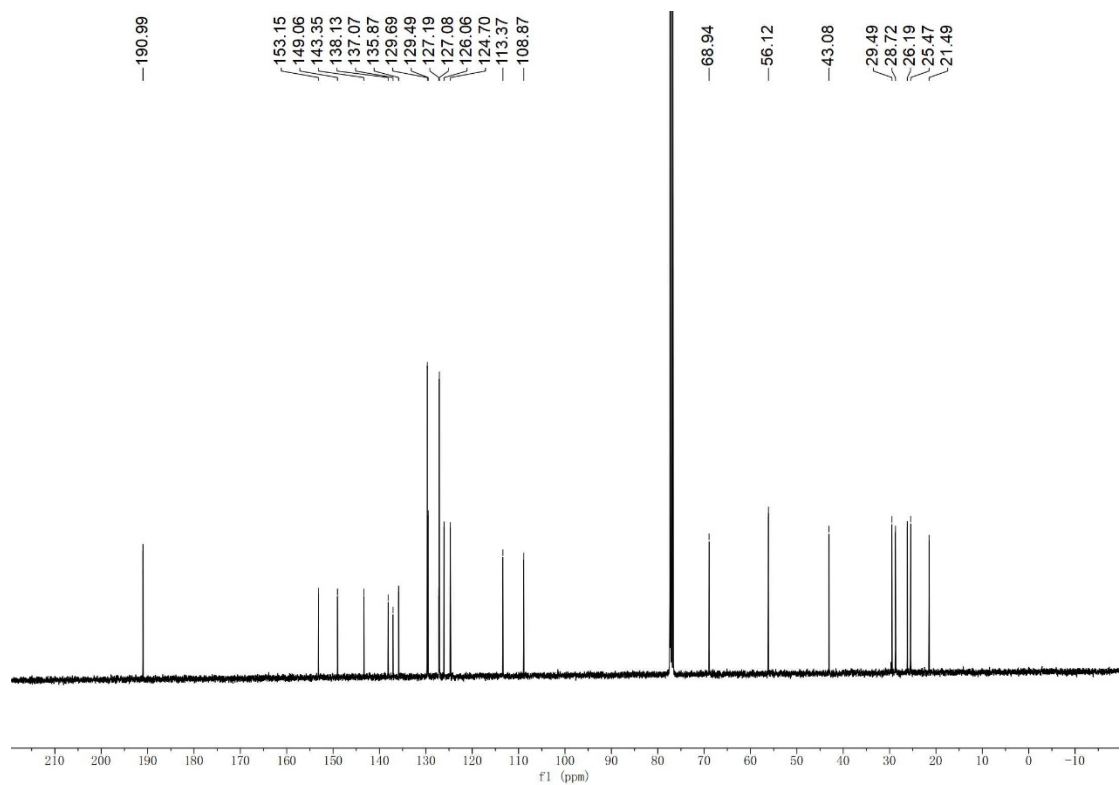

### <sup>1</sup>H NMR (400 MHz, CDCl<sub>3</sub>) spectra of 1k

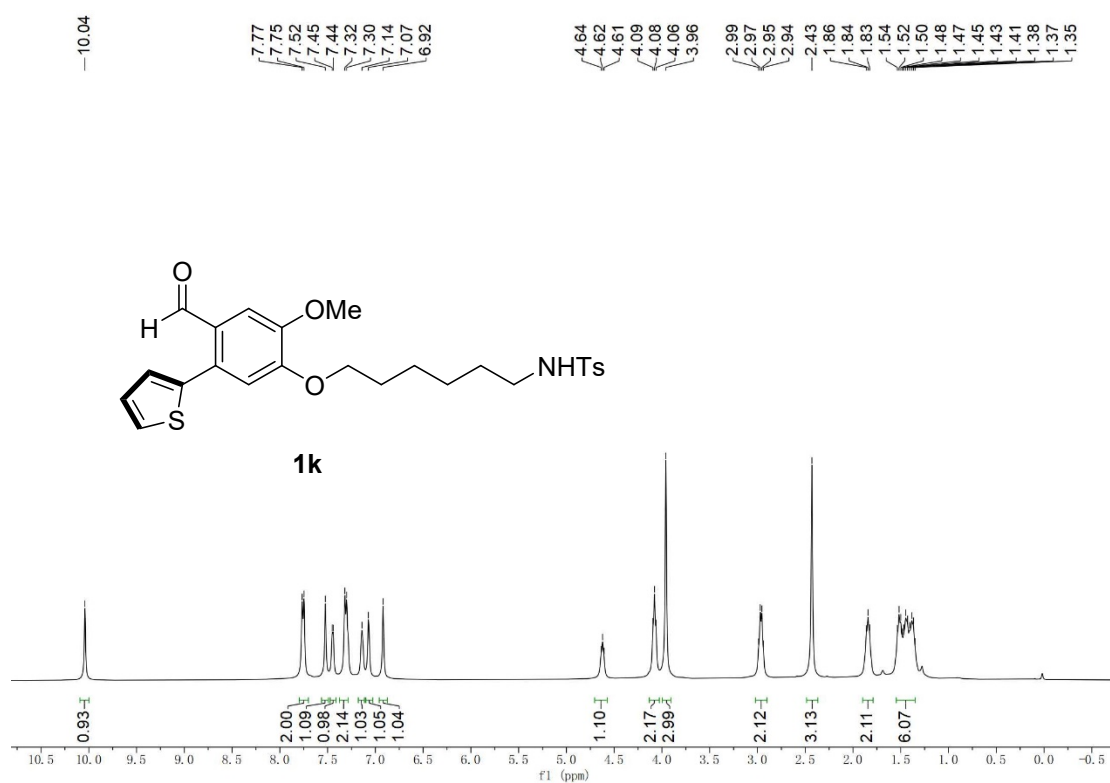

### <sup>13</sup>C NMR (100 MHz, CDCl<sub>3</sub>) spectra of 1k

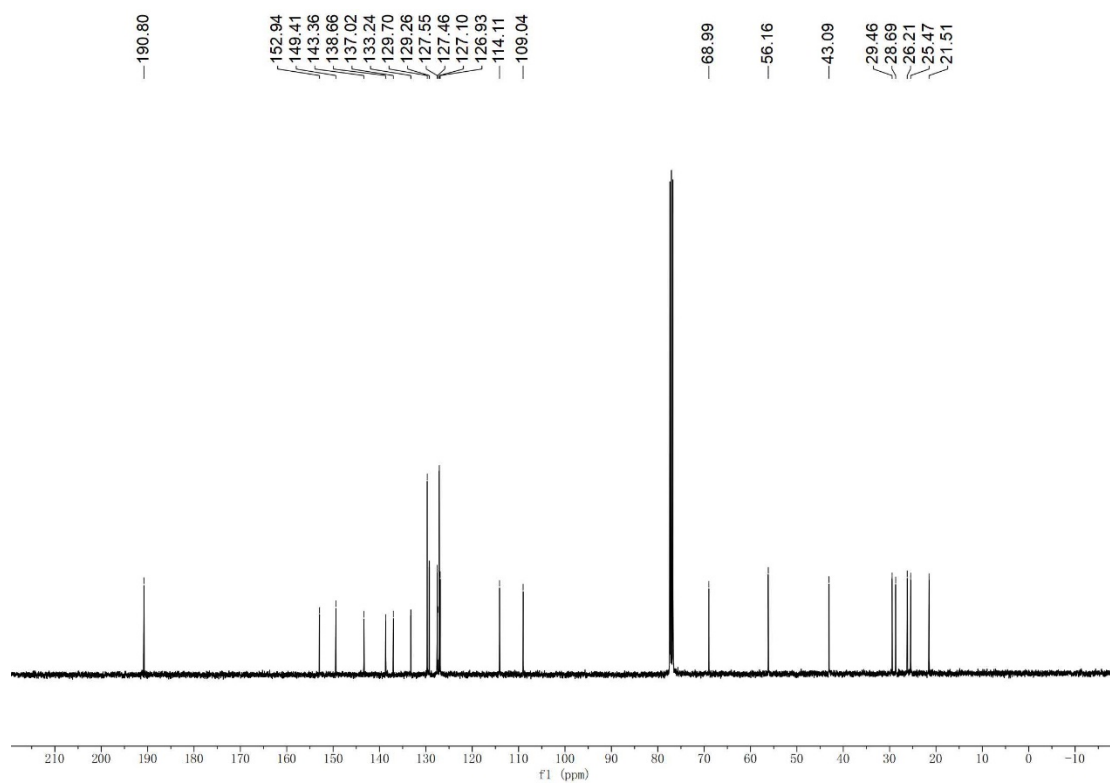

### <sup>1</sup>H NMR (400 MHz, CDCl<sub>3</sub>) spectra of 11

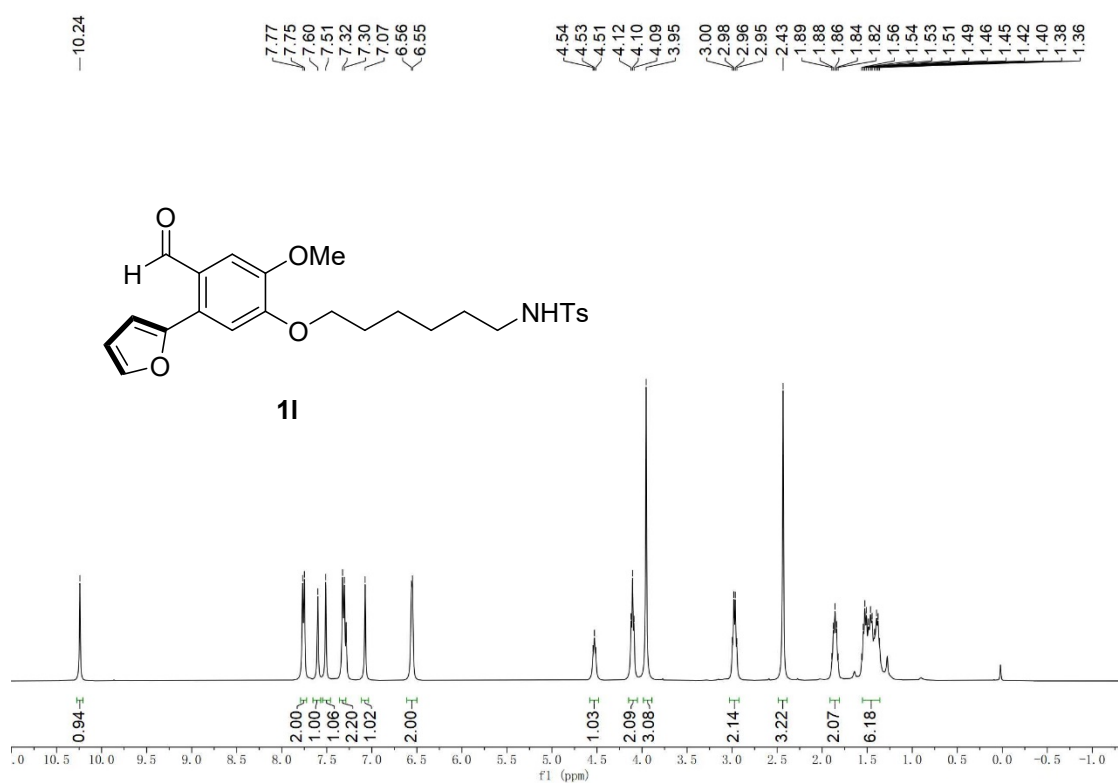

### <sup>13</sup>C NMR (100 MHz, CDCl<sub>3</sub>) spectra of 11

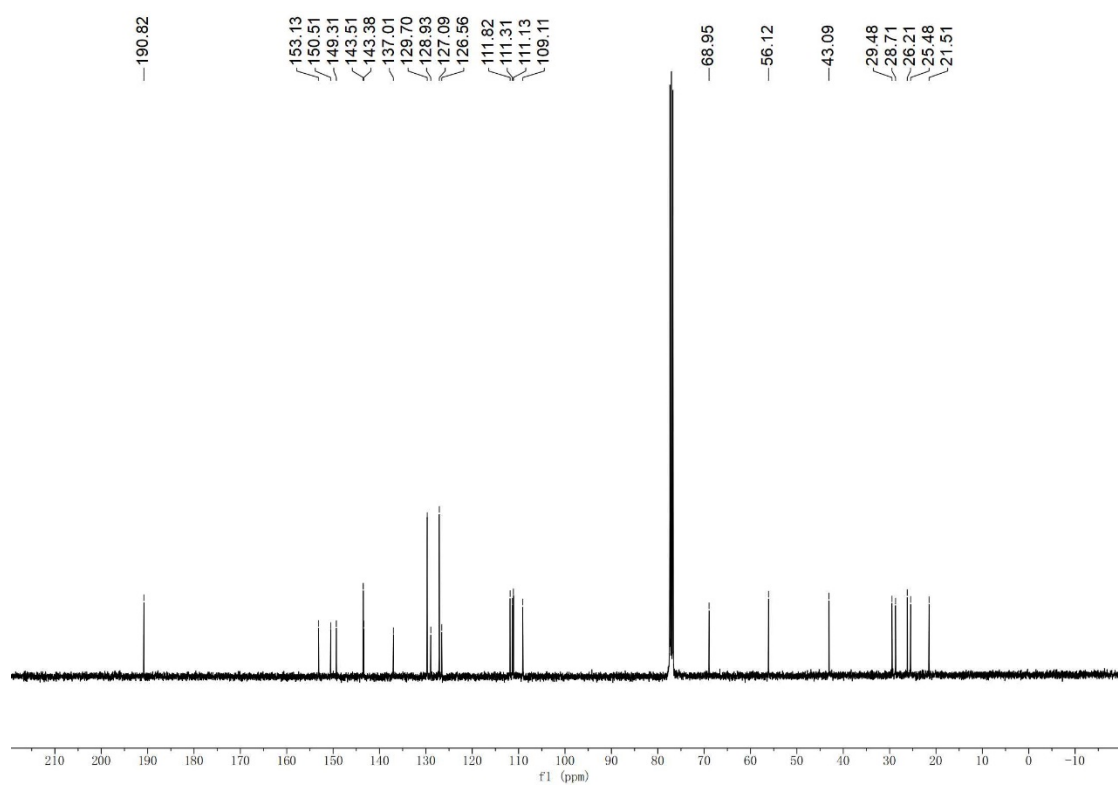

### <sup>1</sup>H NMR (400 MHz, DMSO-d<sub>6</sub>) spectra of 1m

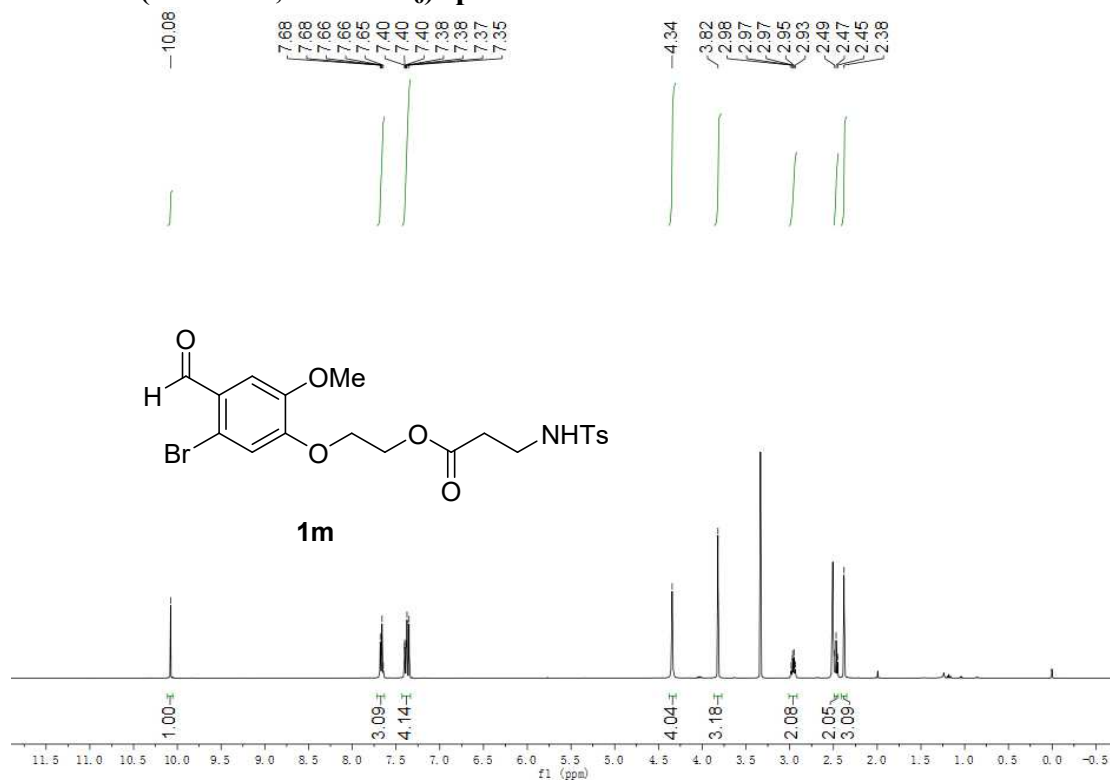

### <sup>13</sup>C NMR (100 MHz, DMSO-d<sub>6</sub>) spectra of 1m

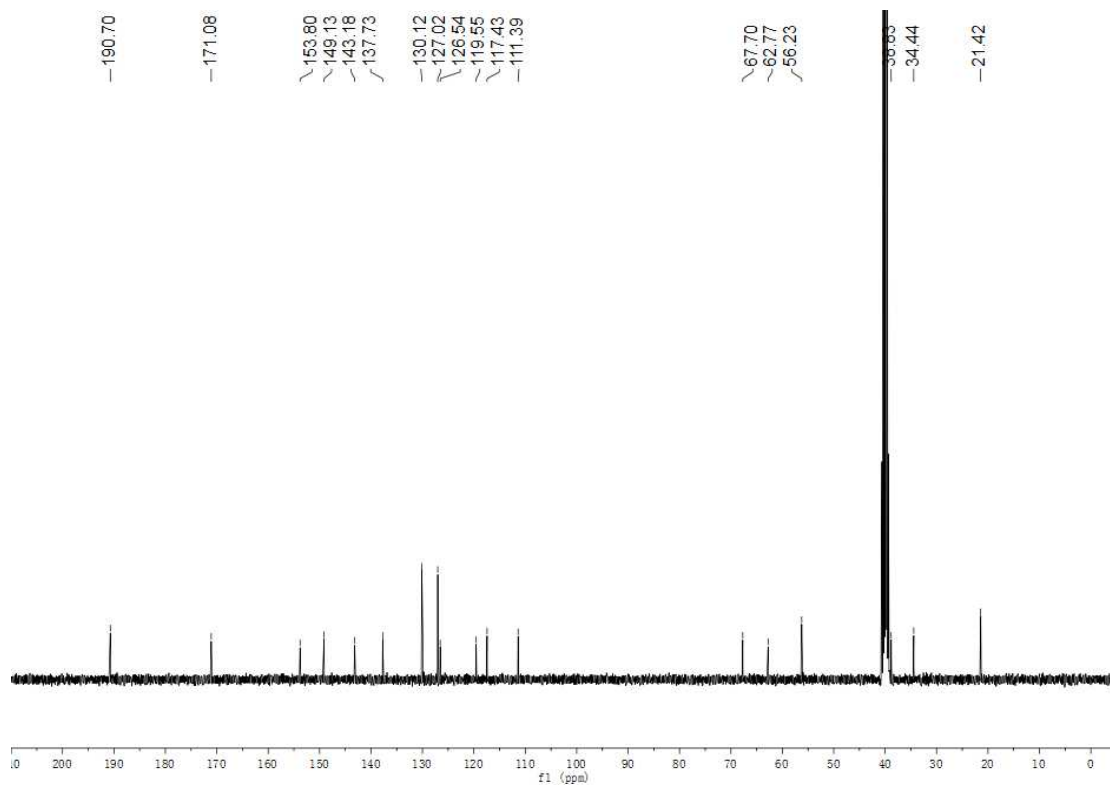

### <sup>1</sup>H NMR (400 MHz, DMSO-d<sub>6</sub>) spectra of 1n

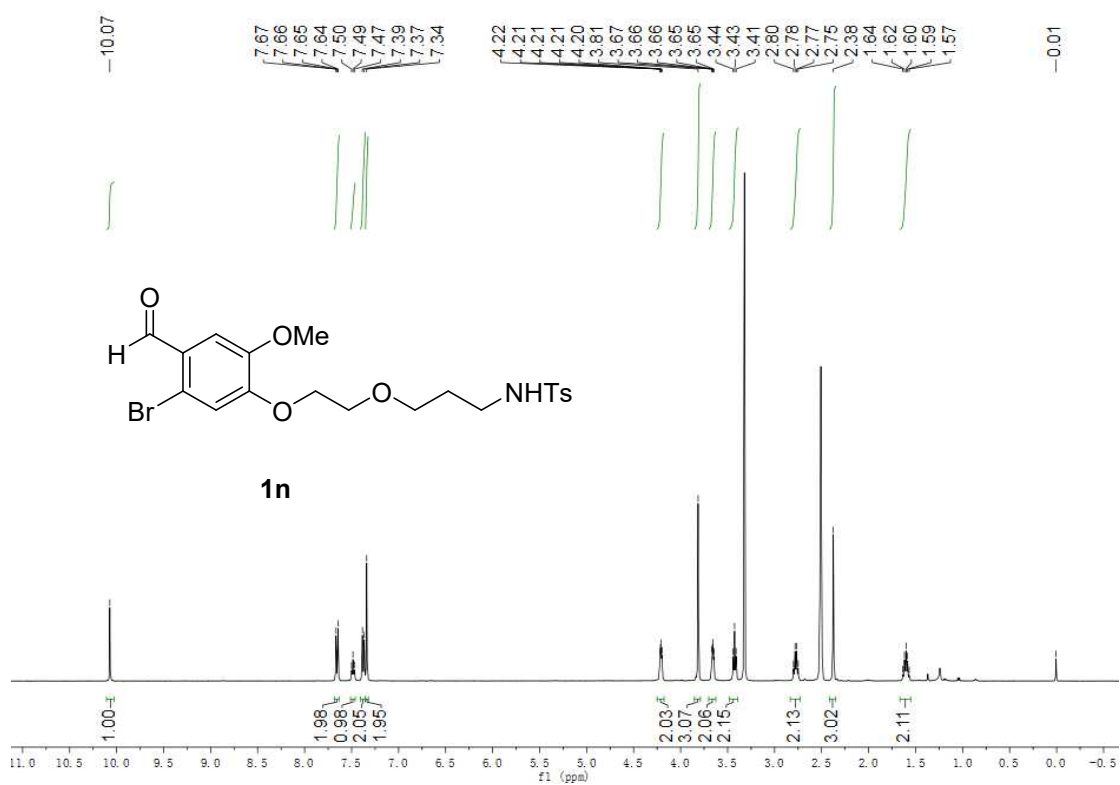

### <sup>13</sup>C NMR (100 MHz, DMSO-d<sub>6</sub>) spectra of 1n

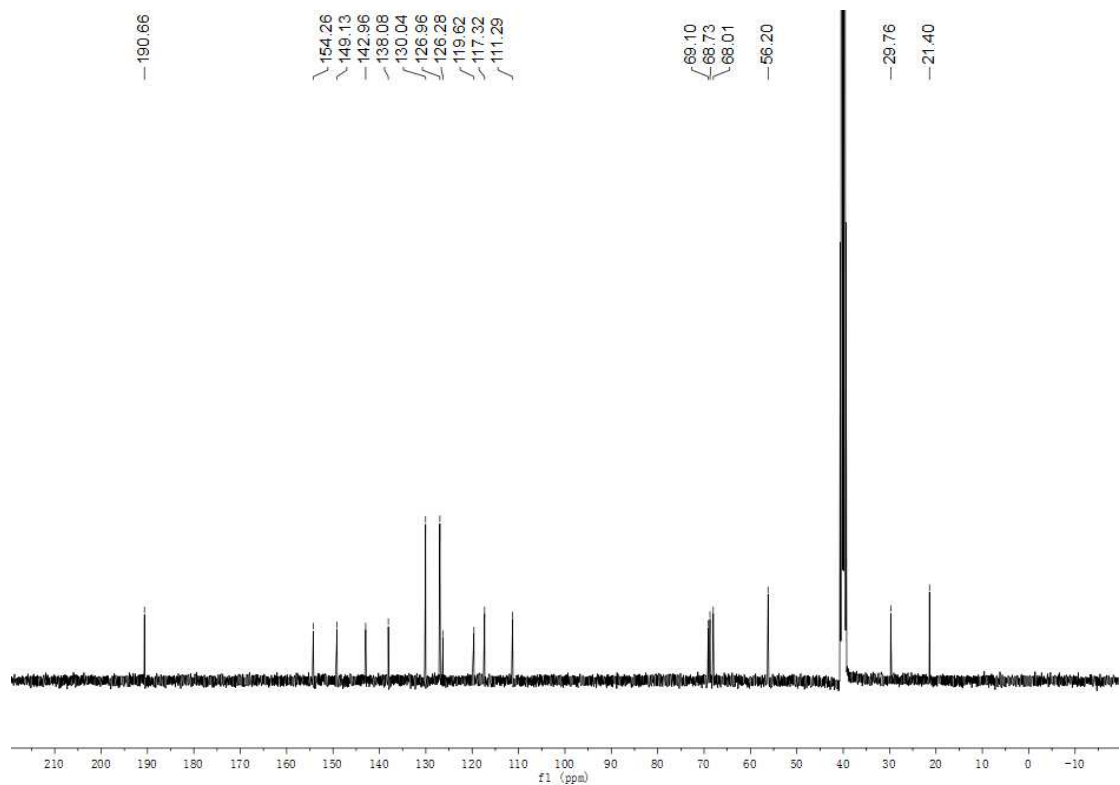

### <sup>1</sup>H NMR (400 MHz, DMSO-d<sub>6</sub>) spectra of 1o

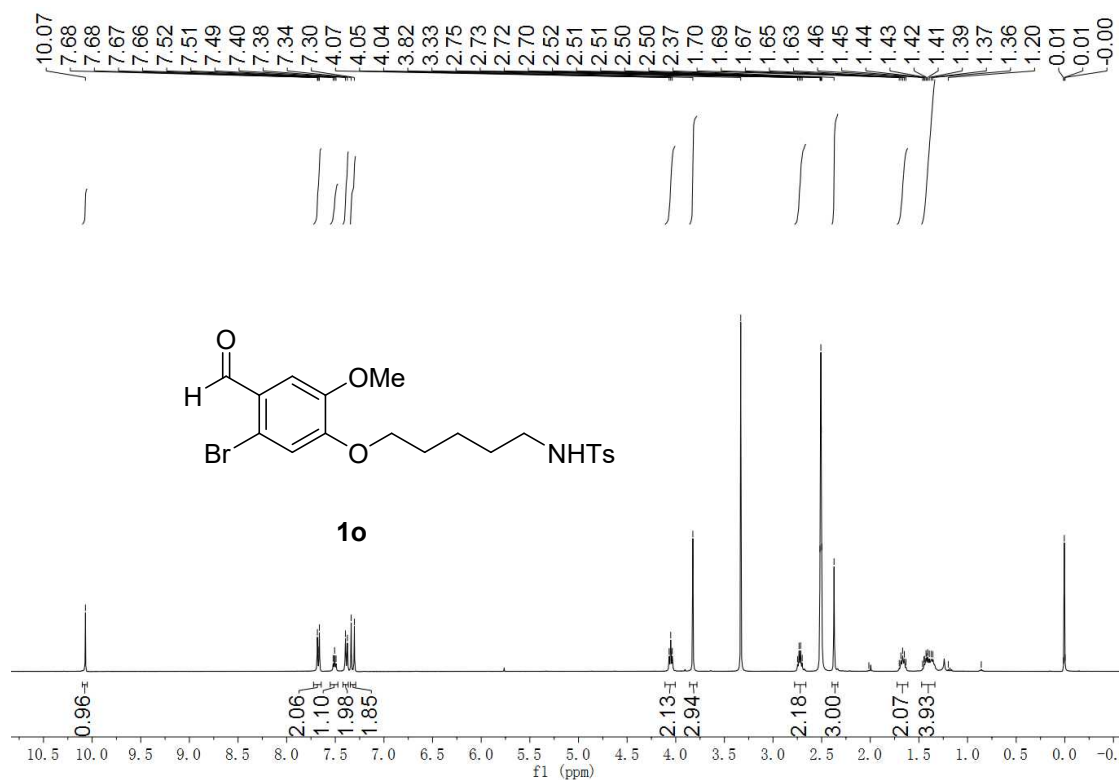

### <sup>13</sup>C NMR (100 MHz, DMSO-d<sub>6</sub>) spectra of 1o

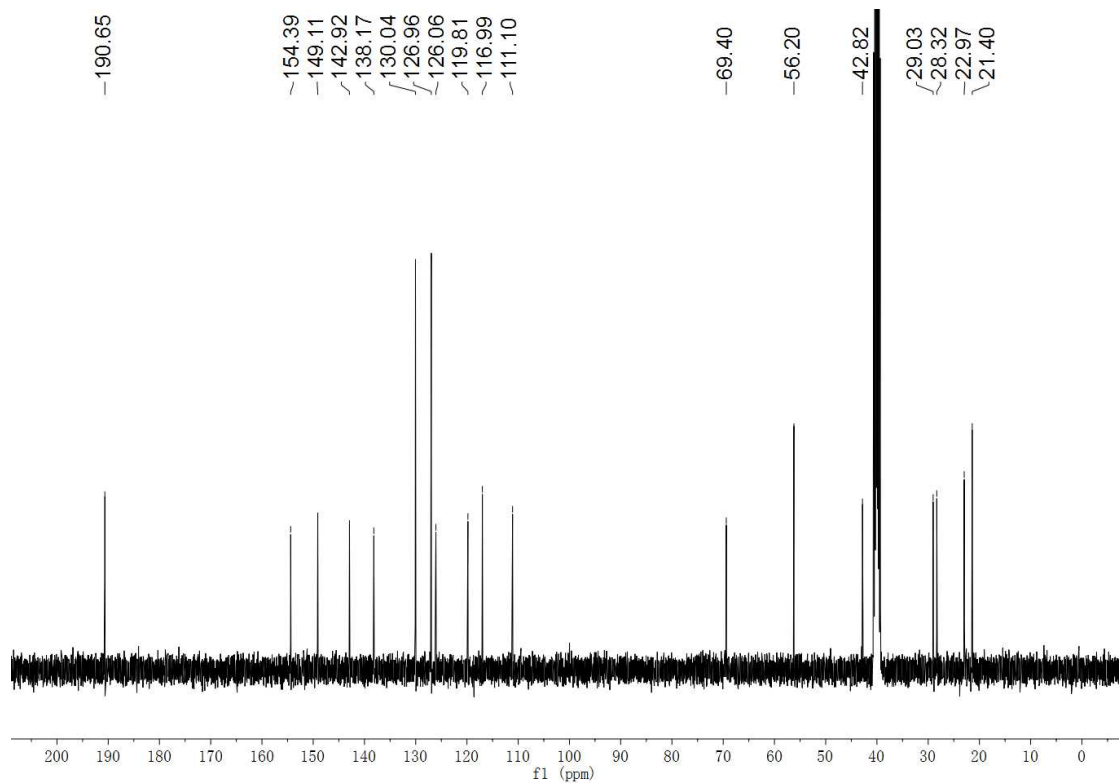

### <sup>1</sup>H NMR (400 MHz, DMSO-d<sub>6</sub>) spectra of 1p

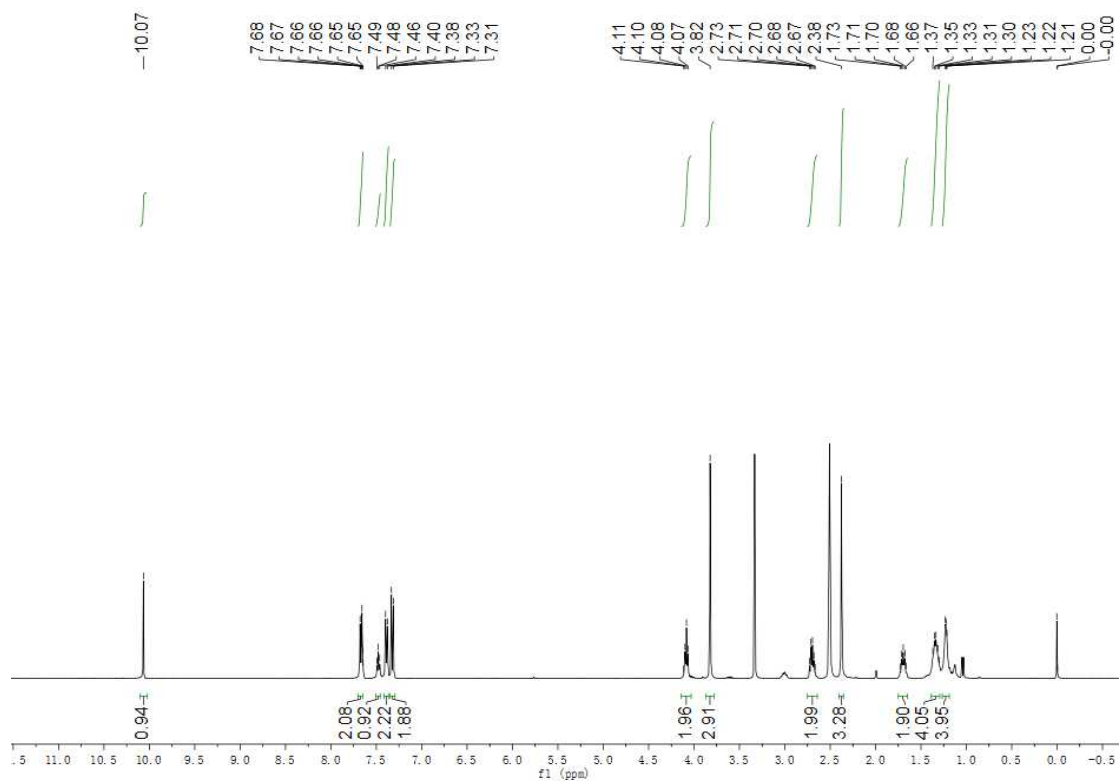

### <sup>13</sup>C NMR (100 MHz, DMSO-d<sub>6</sub>) spectra of 1p

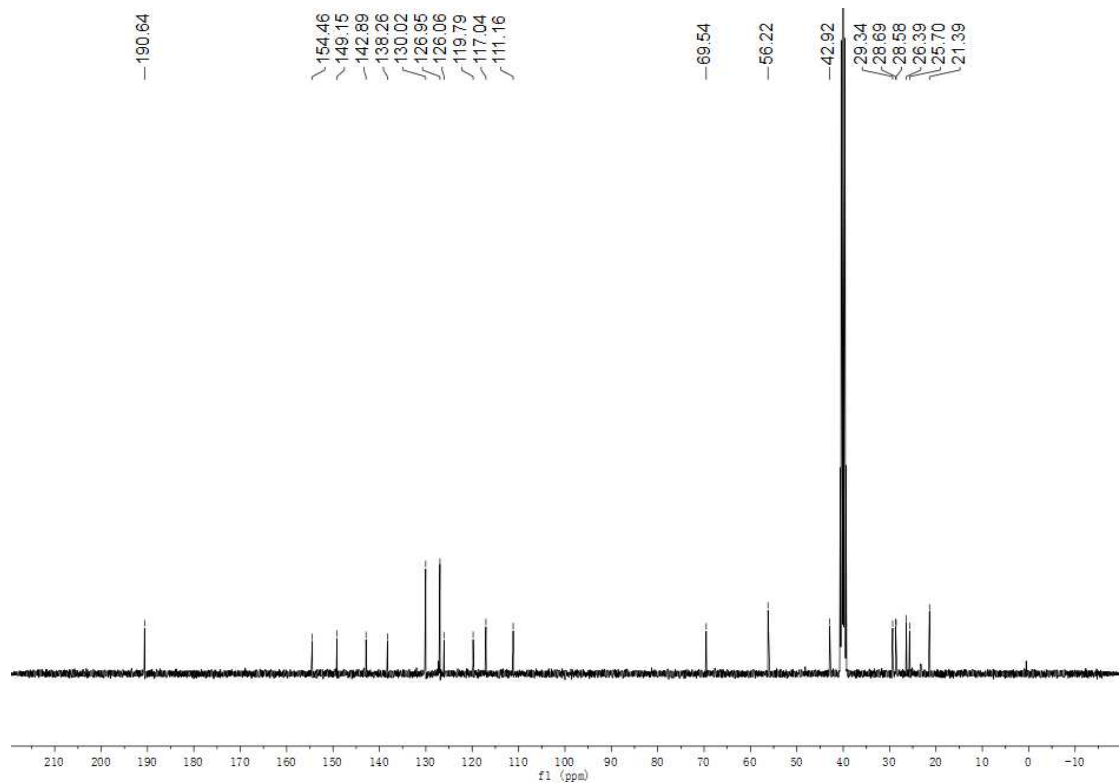

### $^1\text{H}$ NMR (400 MHz, $\text{CDCl}_3$ ) spectra of **1q**

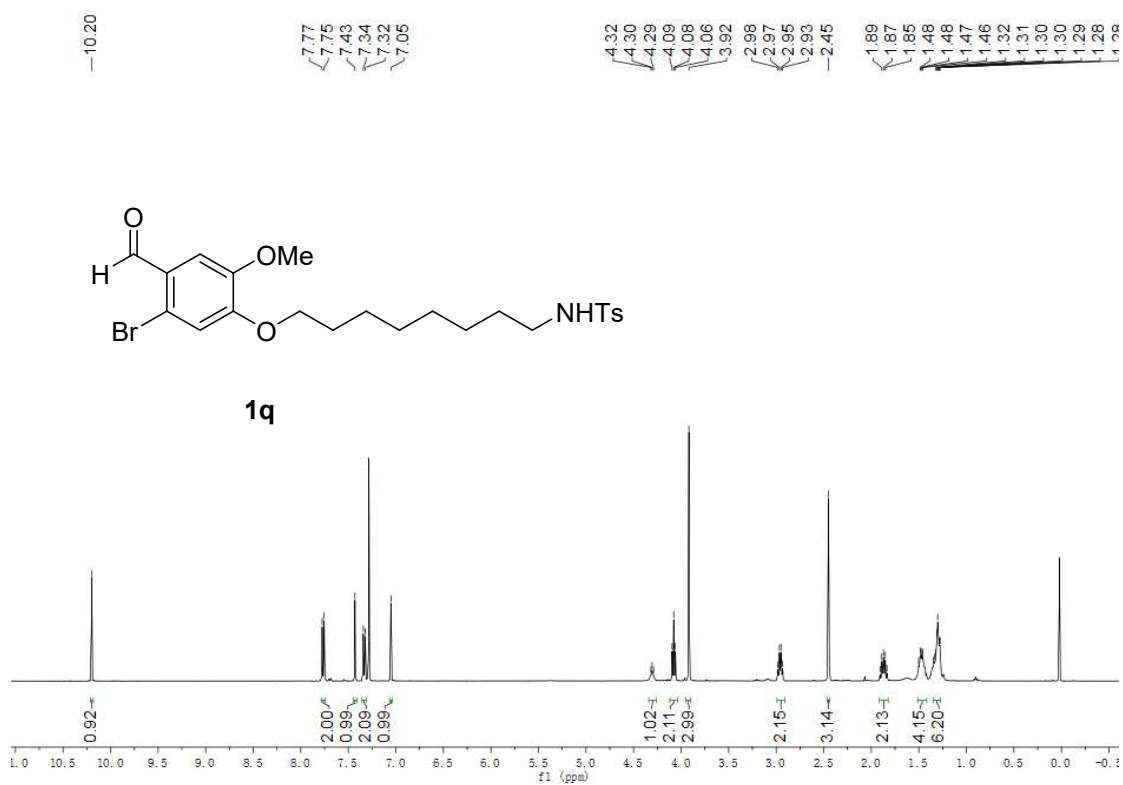

### $^{13}\text{C}$ NMR (100 MHz, $\text{CDCl}_3$ ) spectra of **1q**

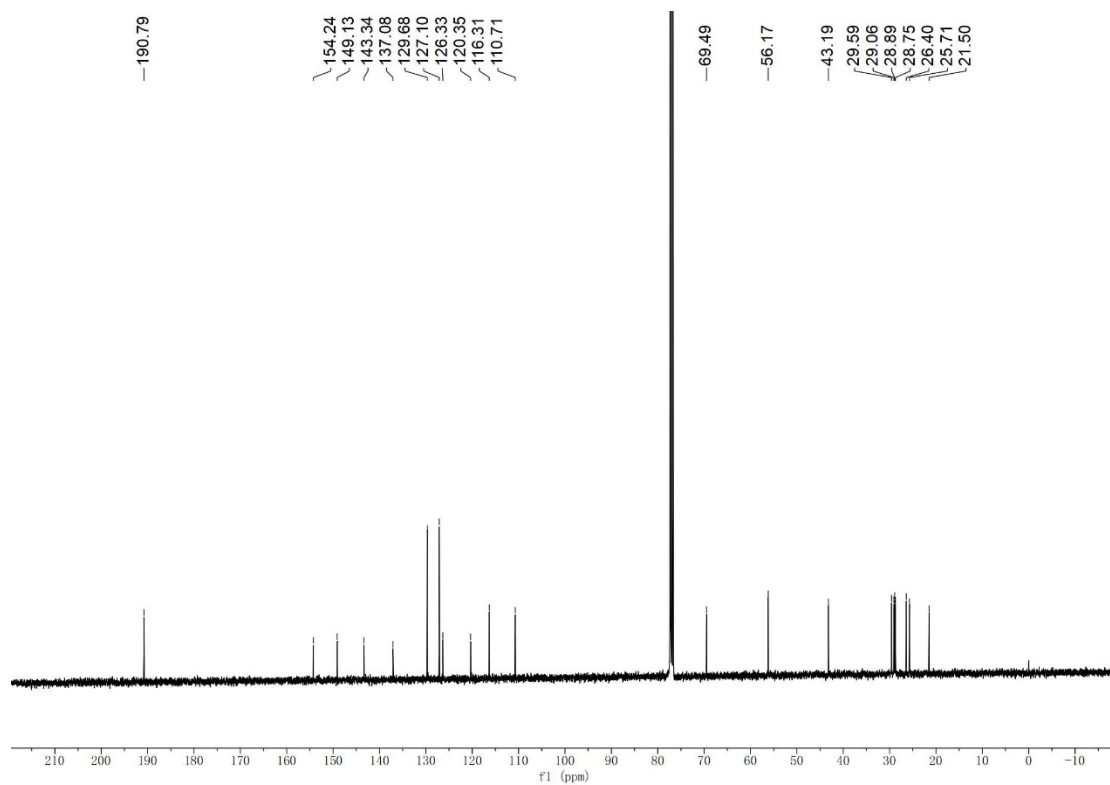



### <sup>1</sup>H NMR (400 MHz, CDCl<sub>3</sub>) spectra of 3a

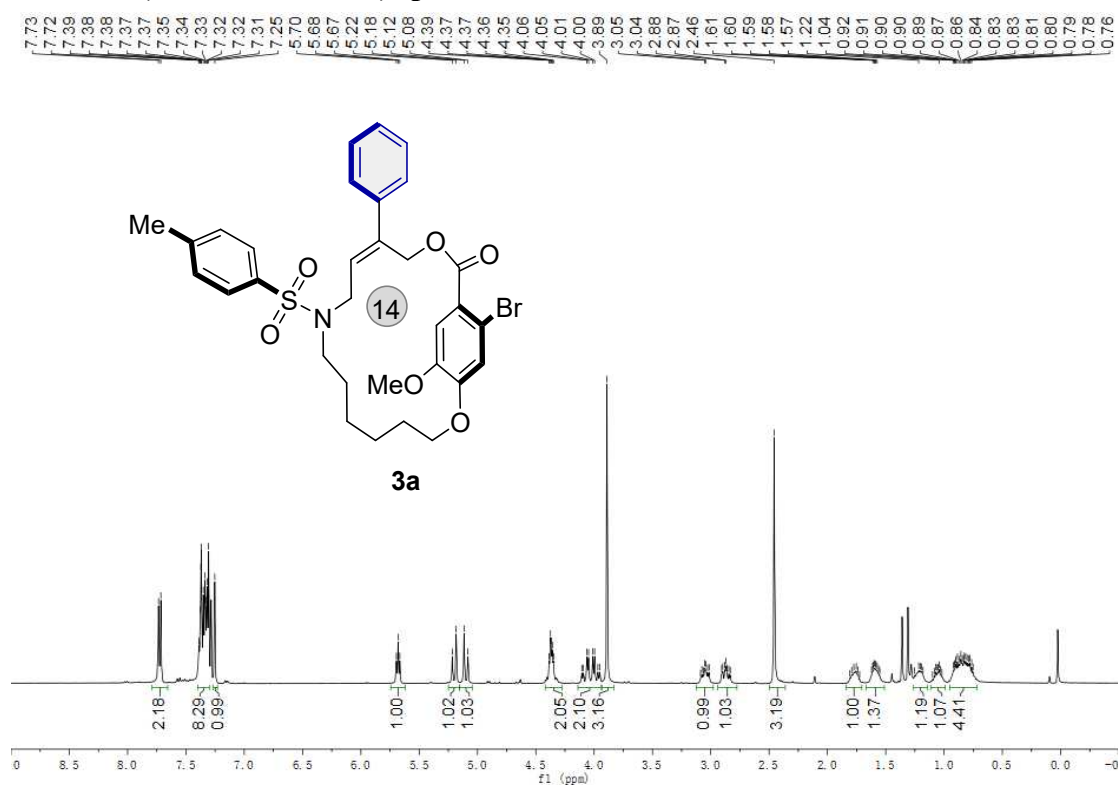

### <sup>13</sup>C NMR (100 MHz, CDCl<sub>3</sub>) spectra of 3a

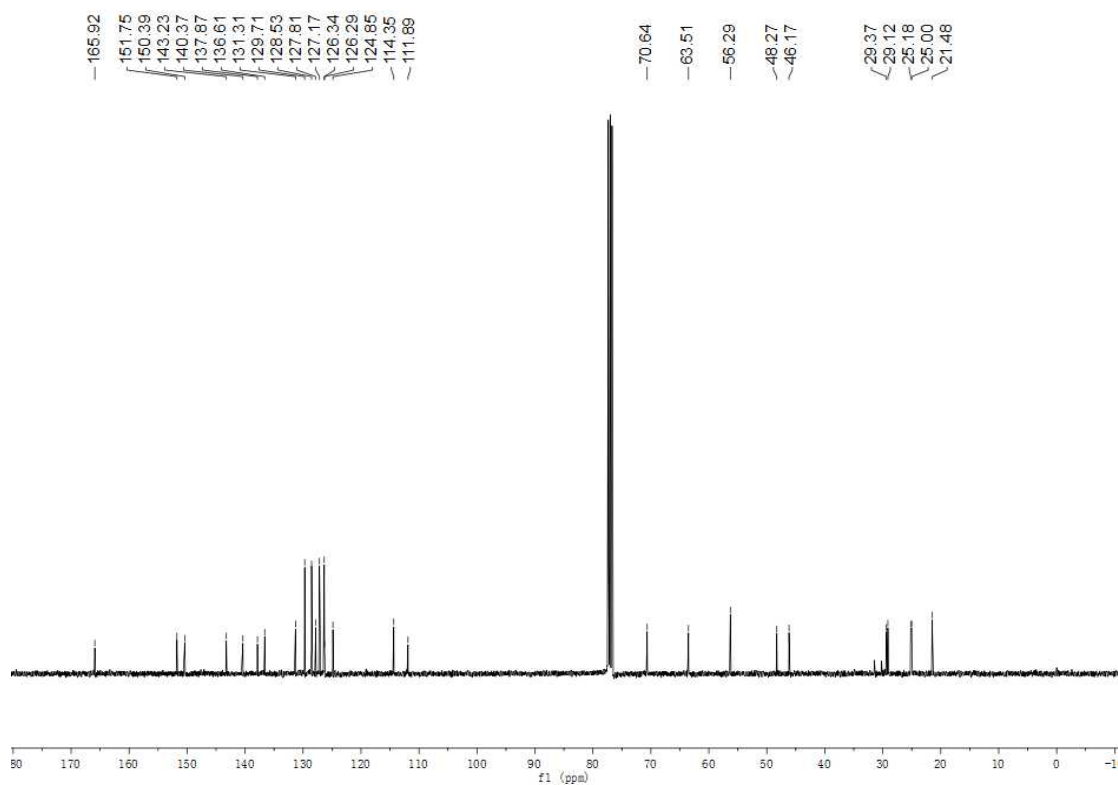

### $^1\text{H}$ NMR (400 MHz, $\text{CDCl}_3$ ) spectra of 3b

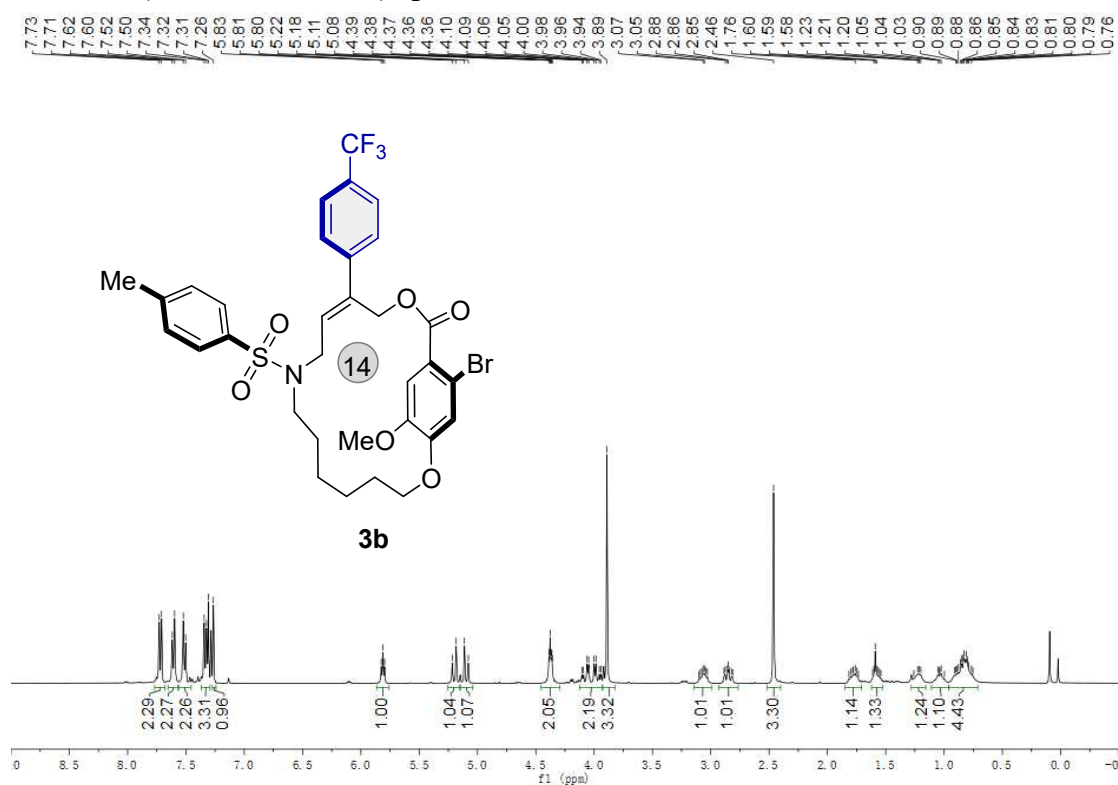

### $^{13}\text{C}$ NMR (100 MHz, $\text{CDCl}_3$ ) spectra of 3b

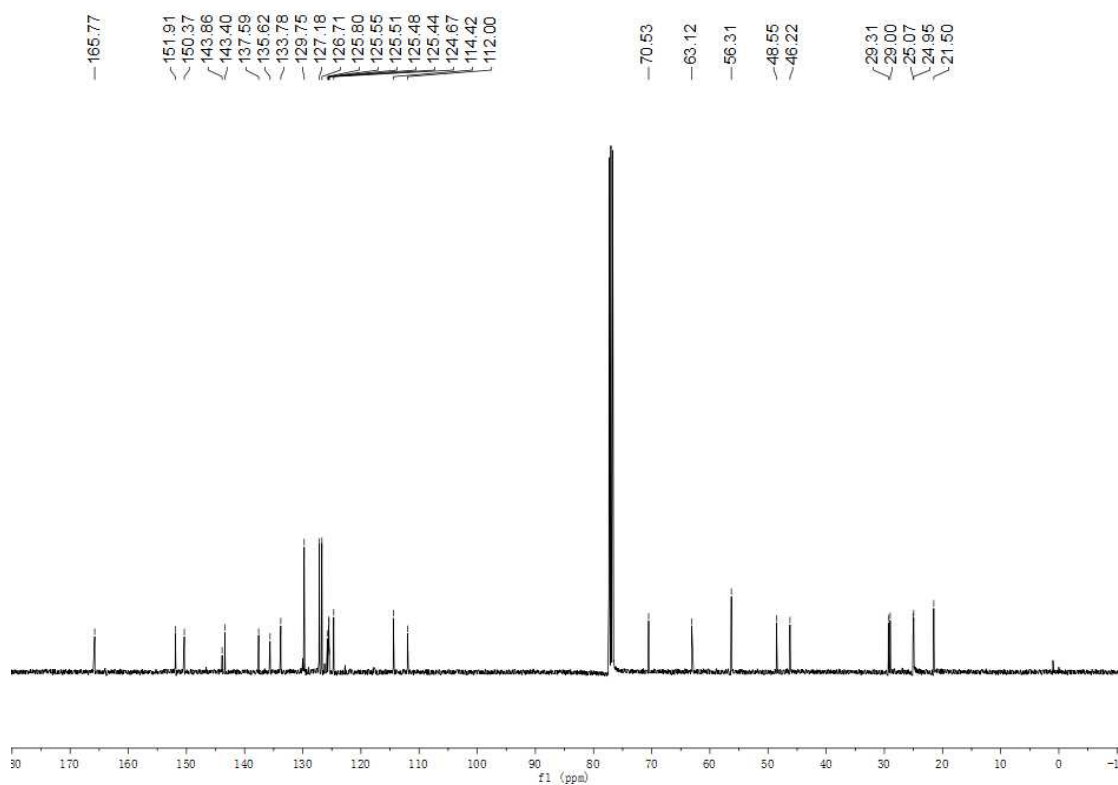

**$^{19}\text{F}$  NMR (376 MHz,  $\text{CDCl}_3$ ) spectra of 3b**

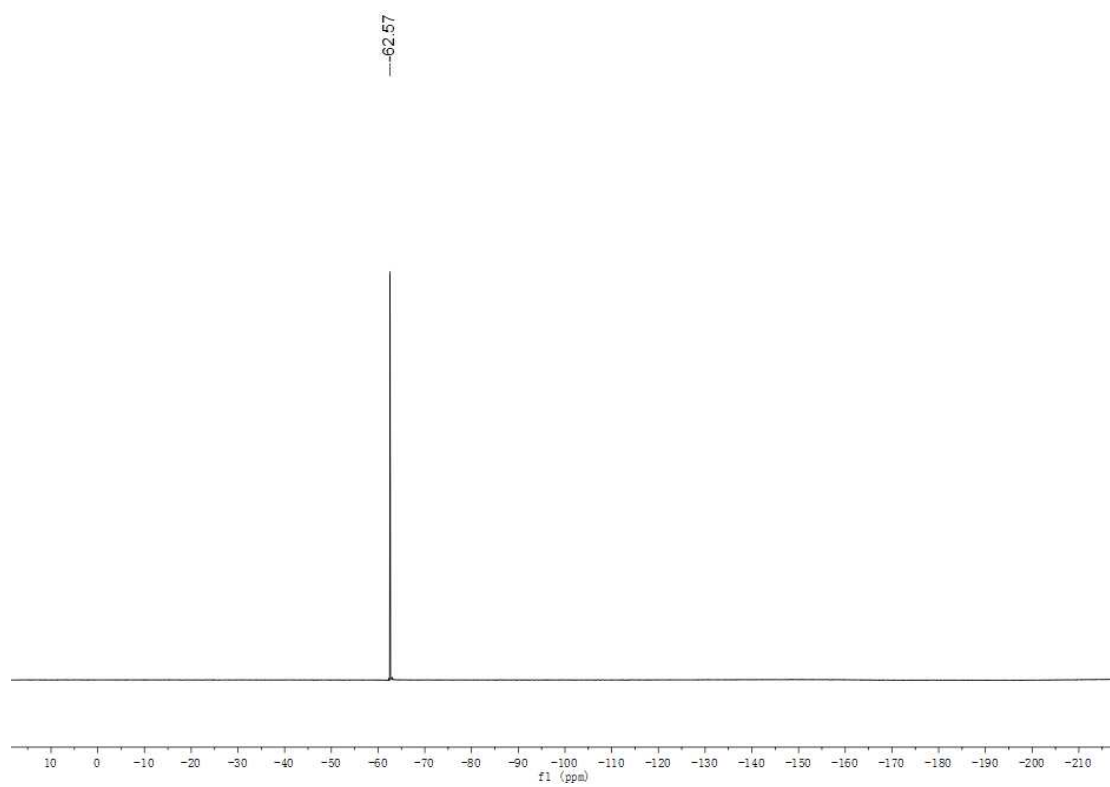

### <sup>1</sup>H NMR (400 MHz, CDCl<sub>3</sub>) spectra of 3c

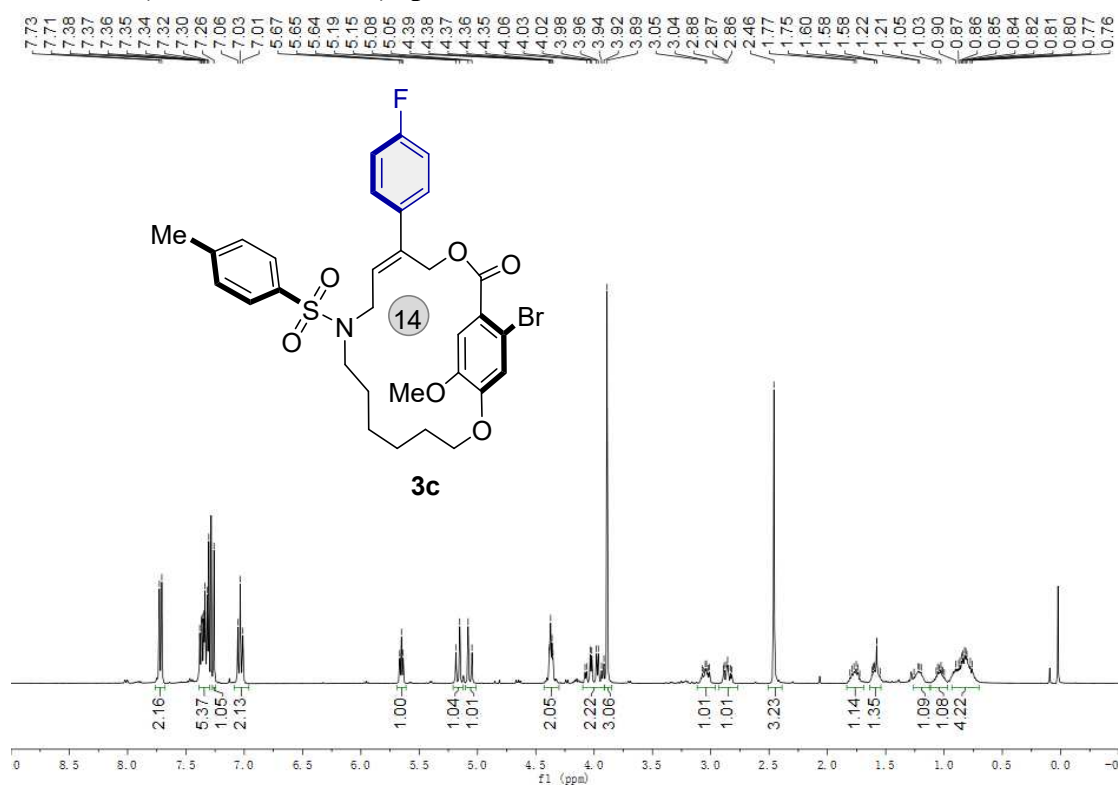

### <sup>13</sup>C NMR (100 MHz, CDCl<sub>3</sub>) spectra of 3c

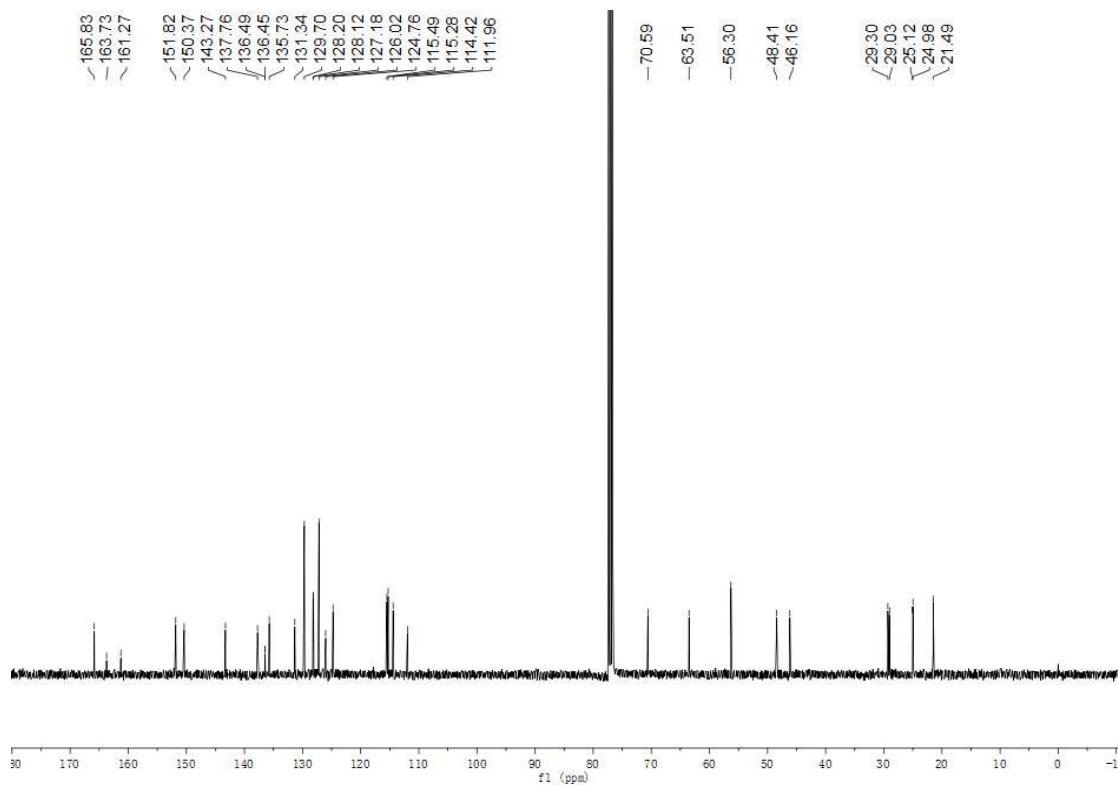

**$^{19}\text{F}$  NMR (376 MHz,  $\text{CDCl}_3$ ) spectra of 3c**

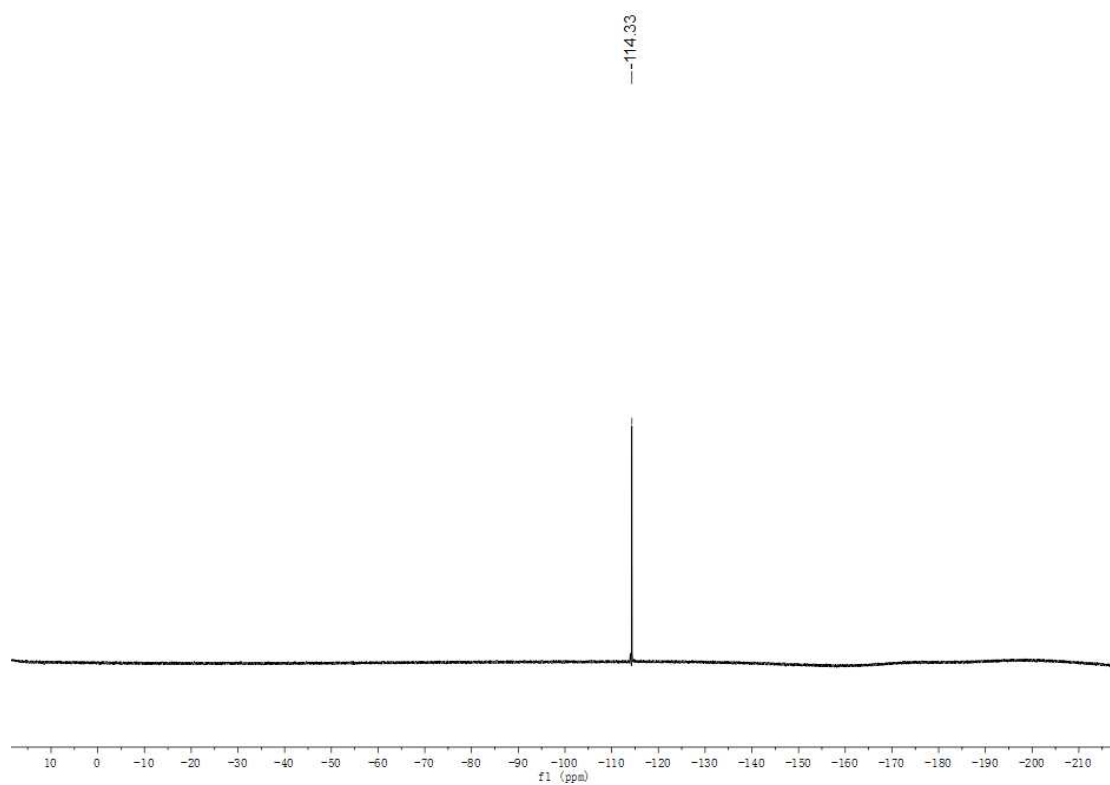

### $^1\text{H}$ NMR (400 MHz, $\text{CDCl}_3$ ) spectra of 3d

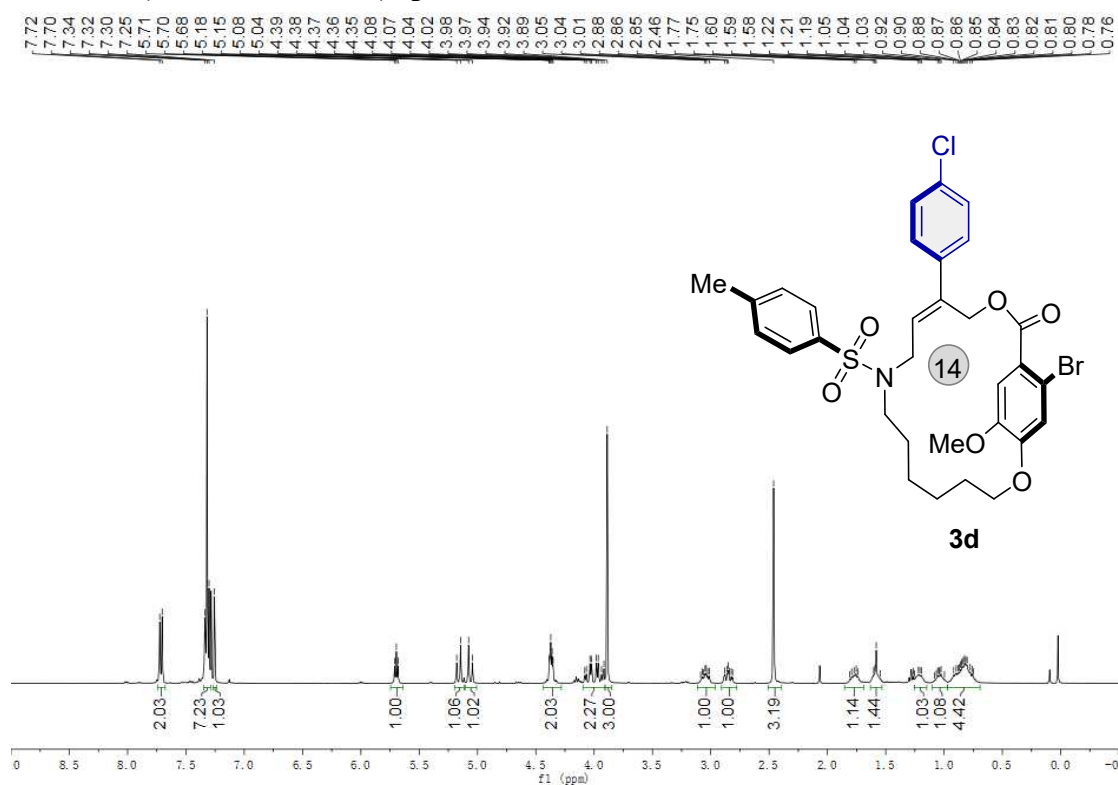

### $^{13}\text{C}$ NMR (100 MHz, $\text{CDCl}_3$ ) spectra of 3d

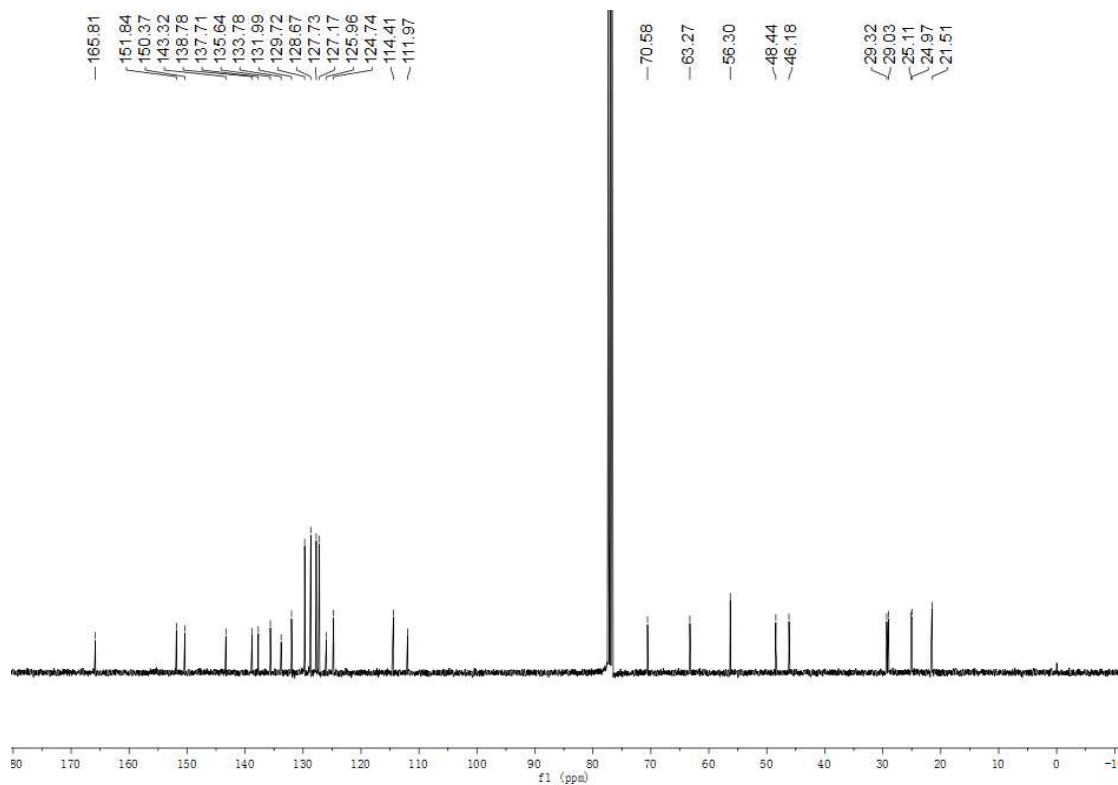

### $^1\text{H}$ NMR (400 MHz, $\text{CDCl}_3$ ) spectra of 3e

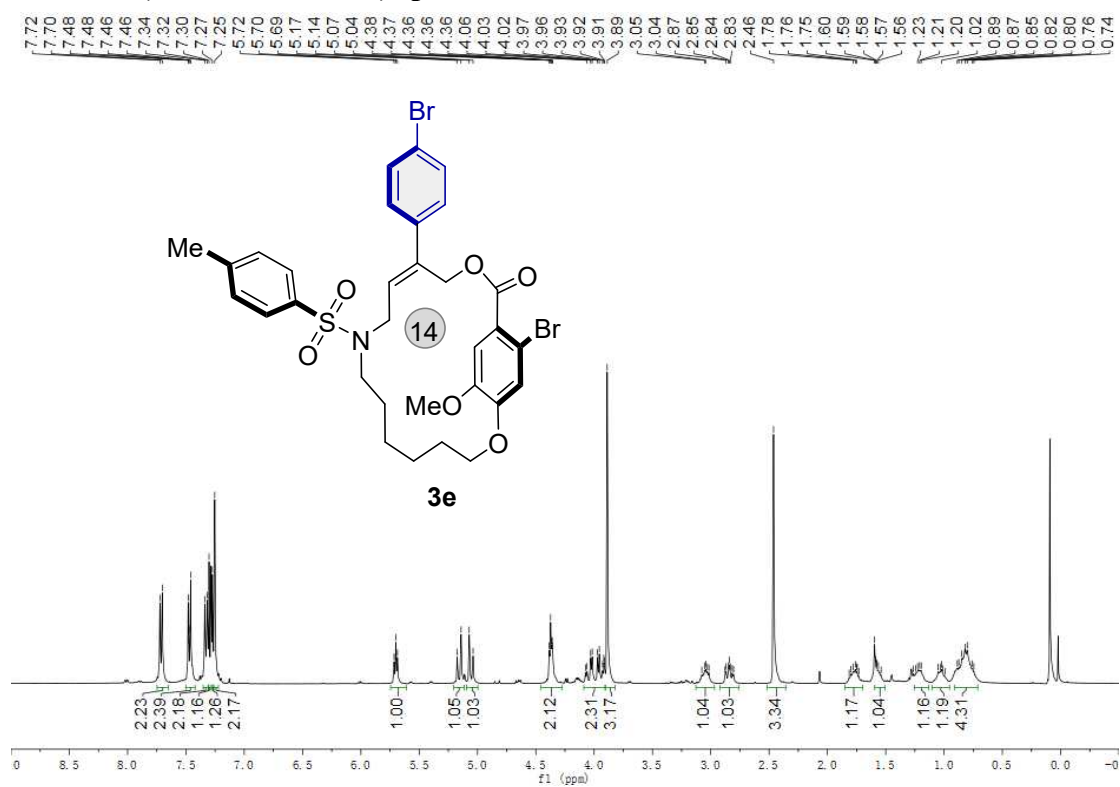

### $^{13}\text{C}$ NMR (100 MHz, $\text{CDCl}_3$ ) spectra of 3e

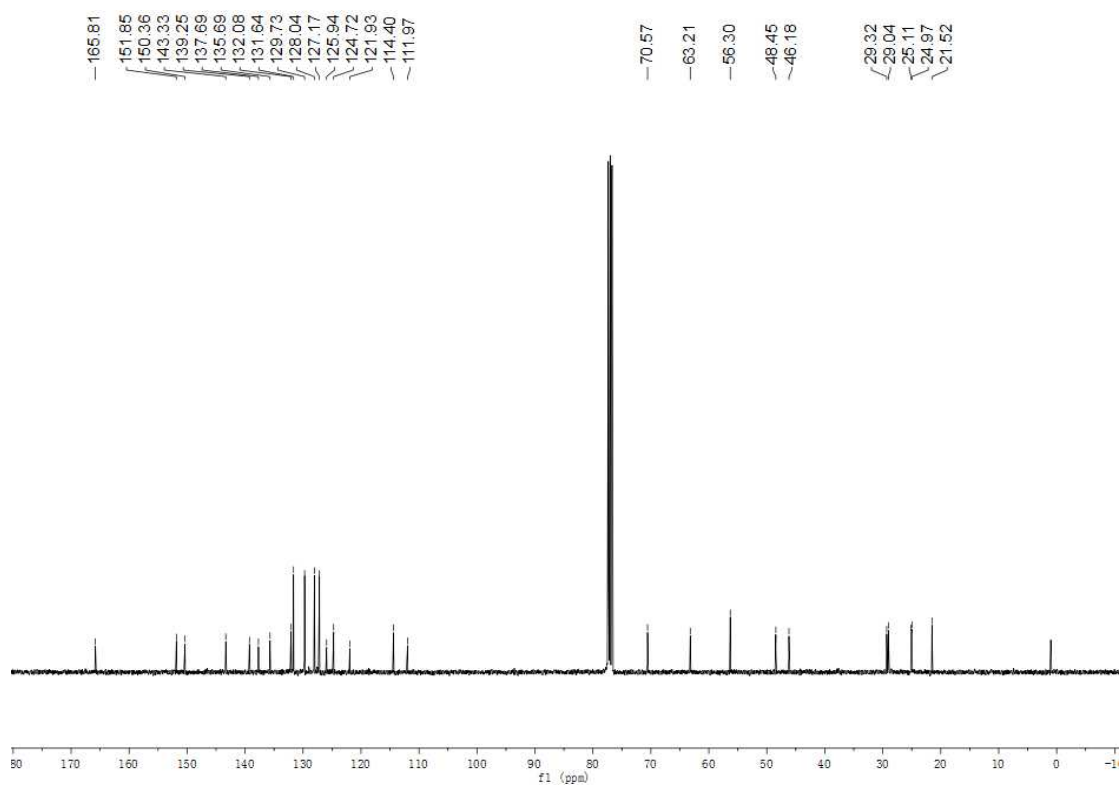

### <sup>1</sup>H NMR (400 MHz, CDCl<sub>3</sub>) spectra of 3f

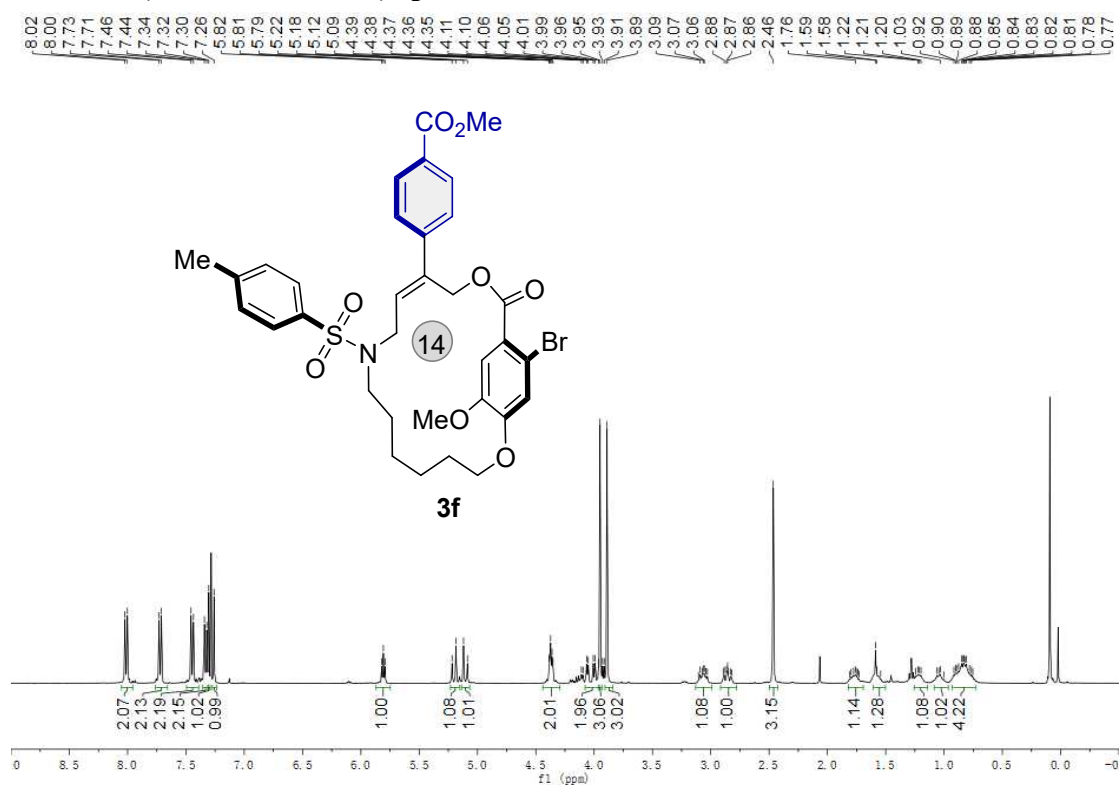

### <sup>13</sup>C NMR (100 MHz, CDCl<sub>3</sub>) spectra of 3f

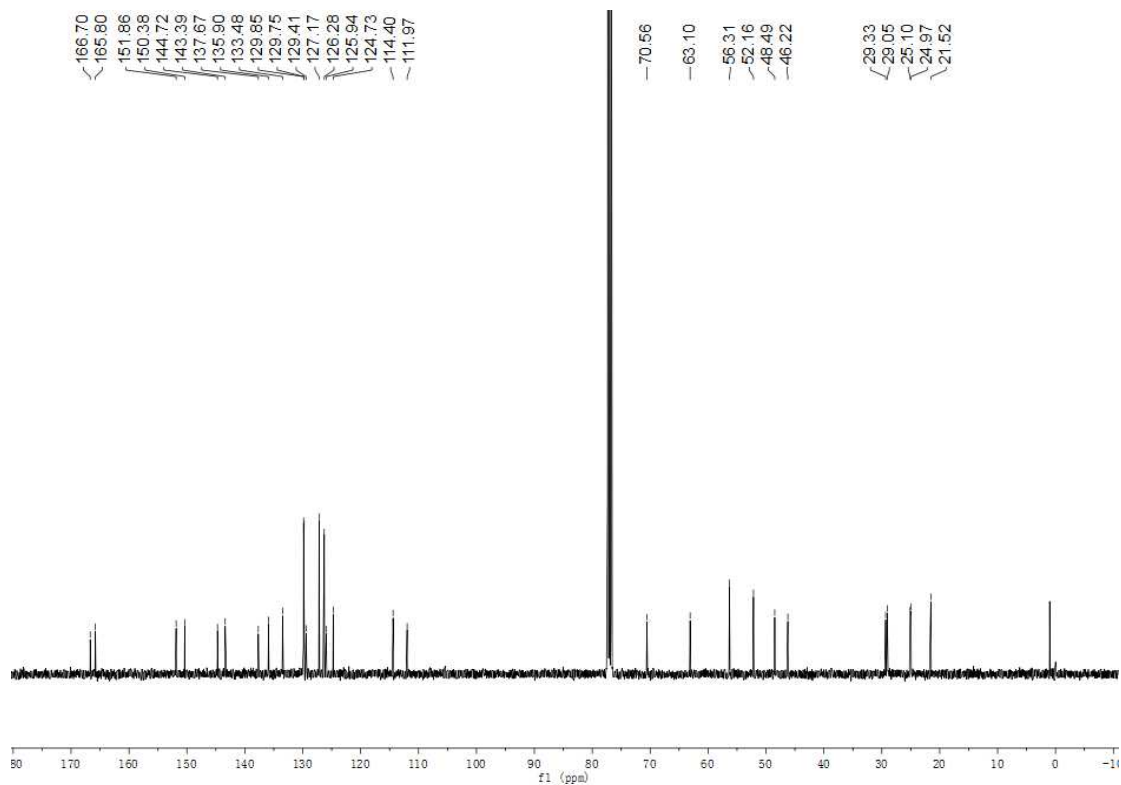



### <sup>1</sup>H NMR (400 MHz, CDCl<sub>3</sub>) spectra of 3g

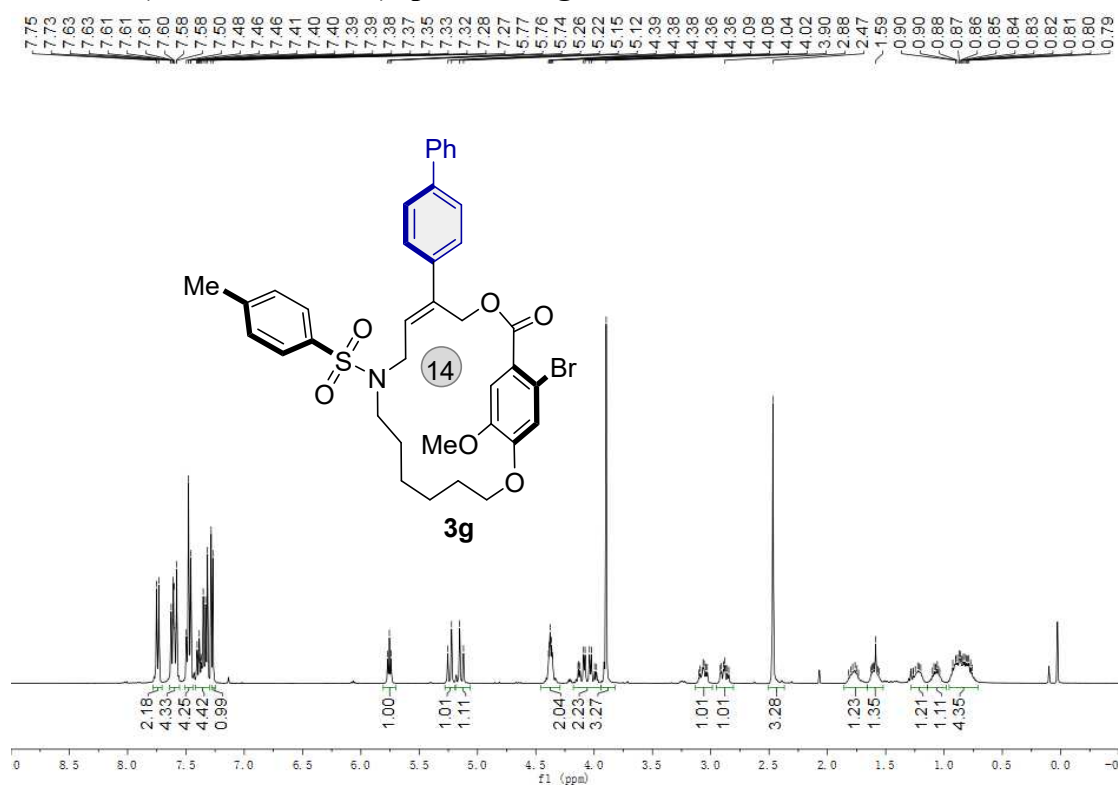

### <sup>13</sup>C NMR (100 MHz, CDCl<sub>3</sub>) spectra of 3g

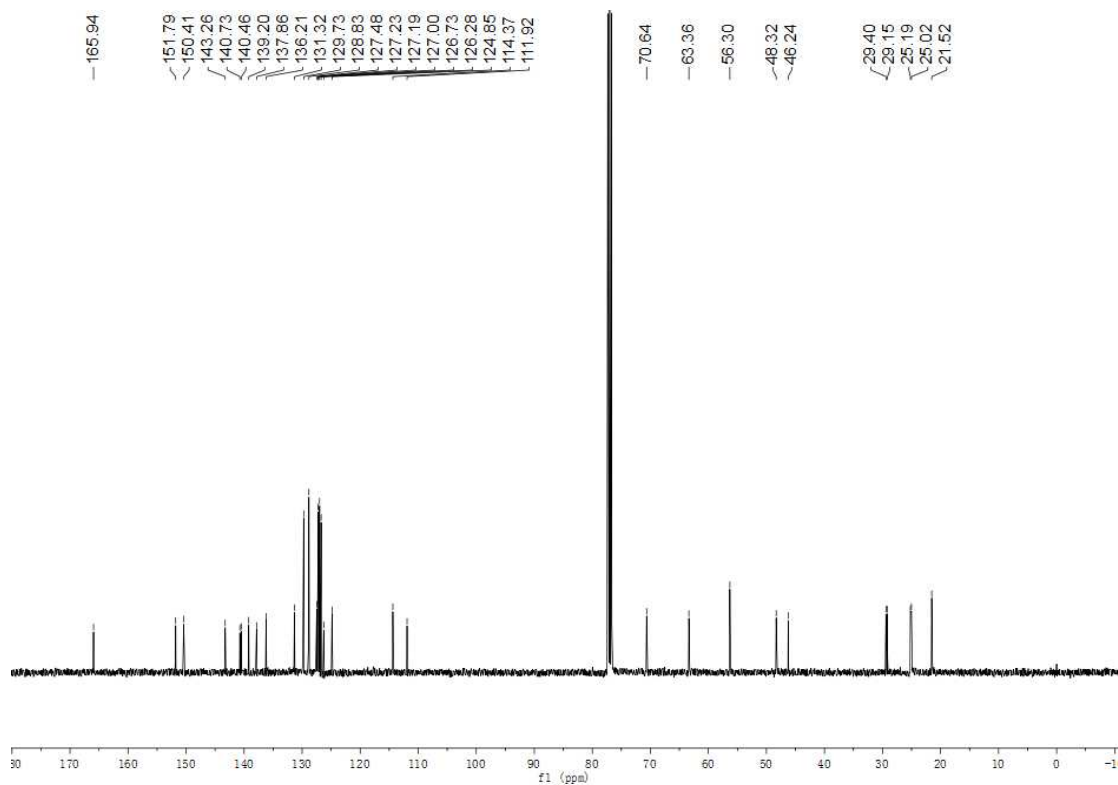

**<sup>1</sup>H NMR (400 MHz, CDCl<sub>3</sub>) spectra of 3h**

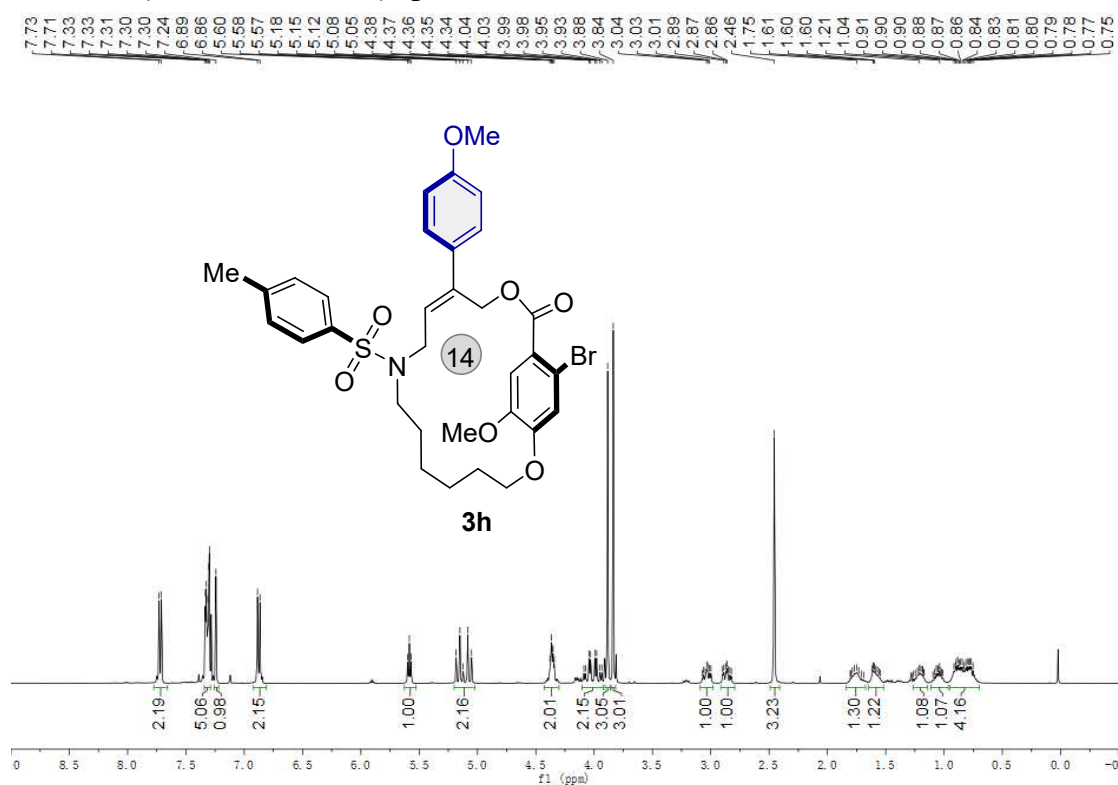

**<sup>13</sup>C NMR (100 MHz, CDCl<sub>3</sub>) spectra of 3h**

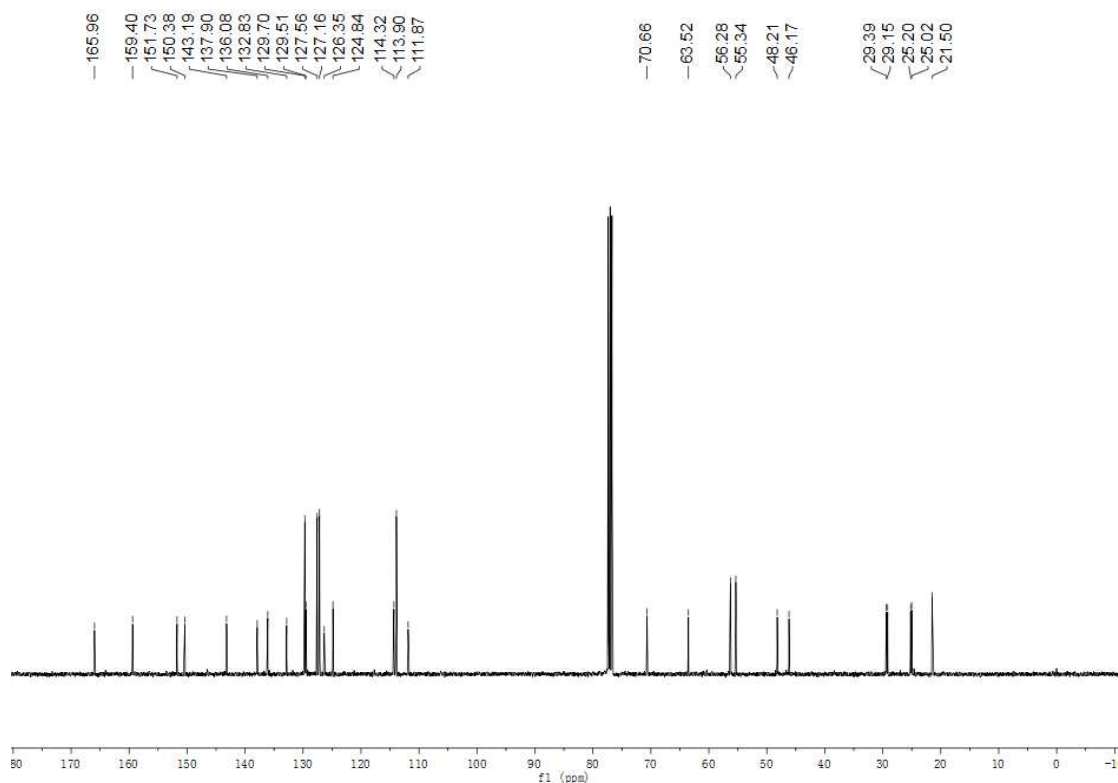

### <sup>1</sup>H NMR (400 MHz, CDCl<sub>3</sub>) spectra of 3i

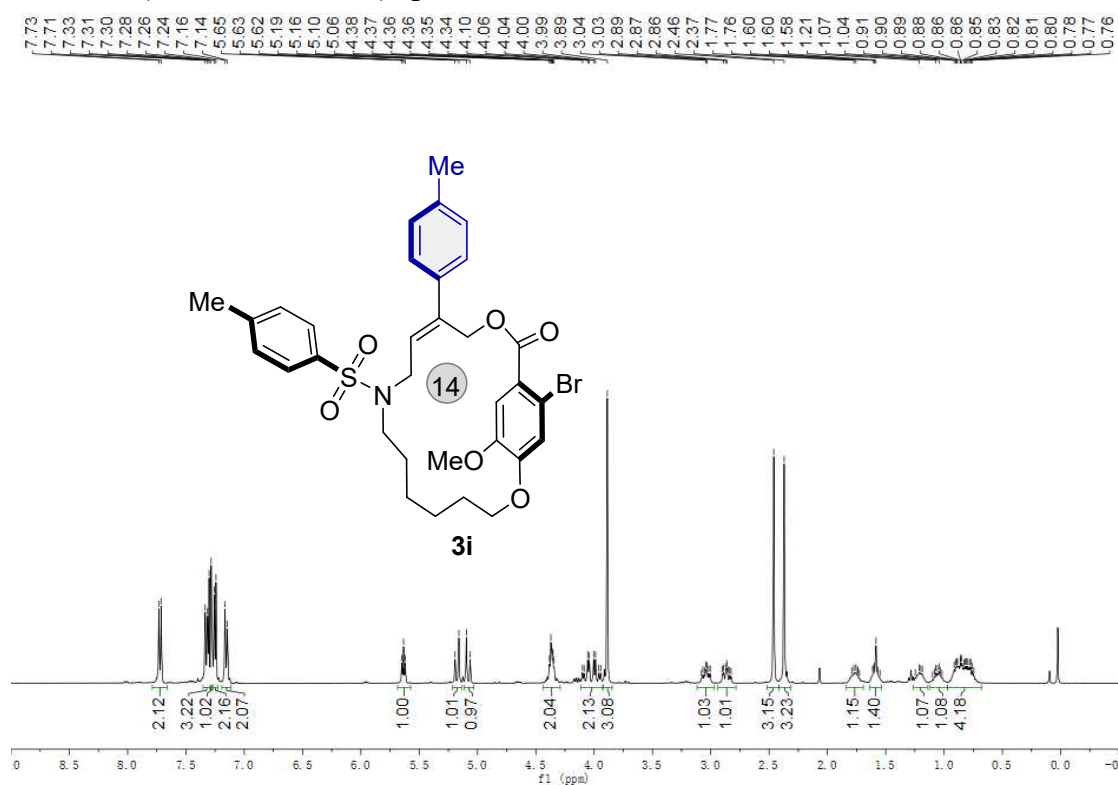

### <sup>13</sup>C NMR (100 MHz, CDCl<sub>3</sub>) spectra of 3i

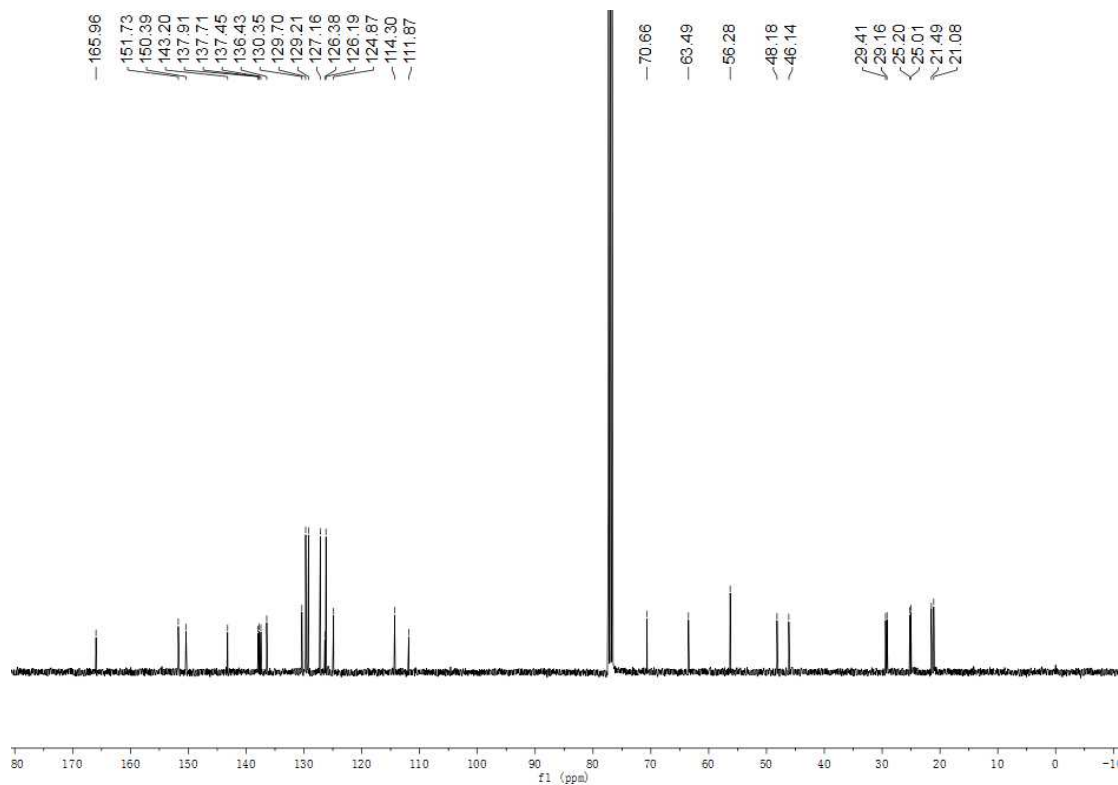

### <sup>1</sup>H NMR (400 MHz, CDCl<sub>3</sub>) spectra of 3j

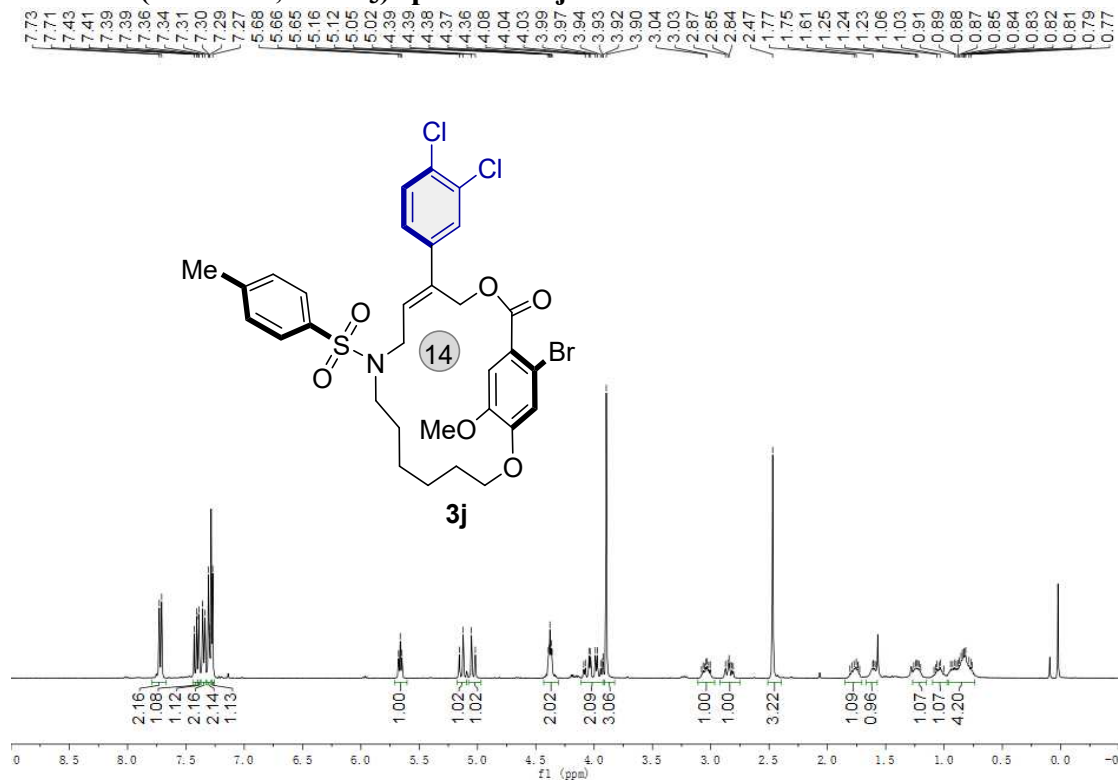

### <sup>13</sup>C NMR (100 MHz, CDCl<sub>3</sub>) spectra of 3j

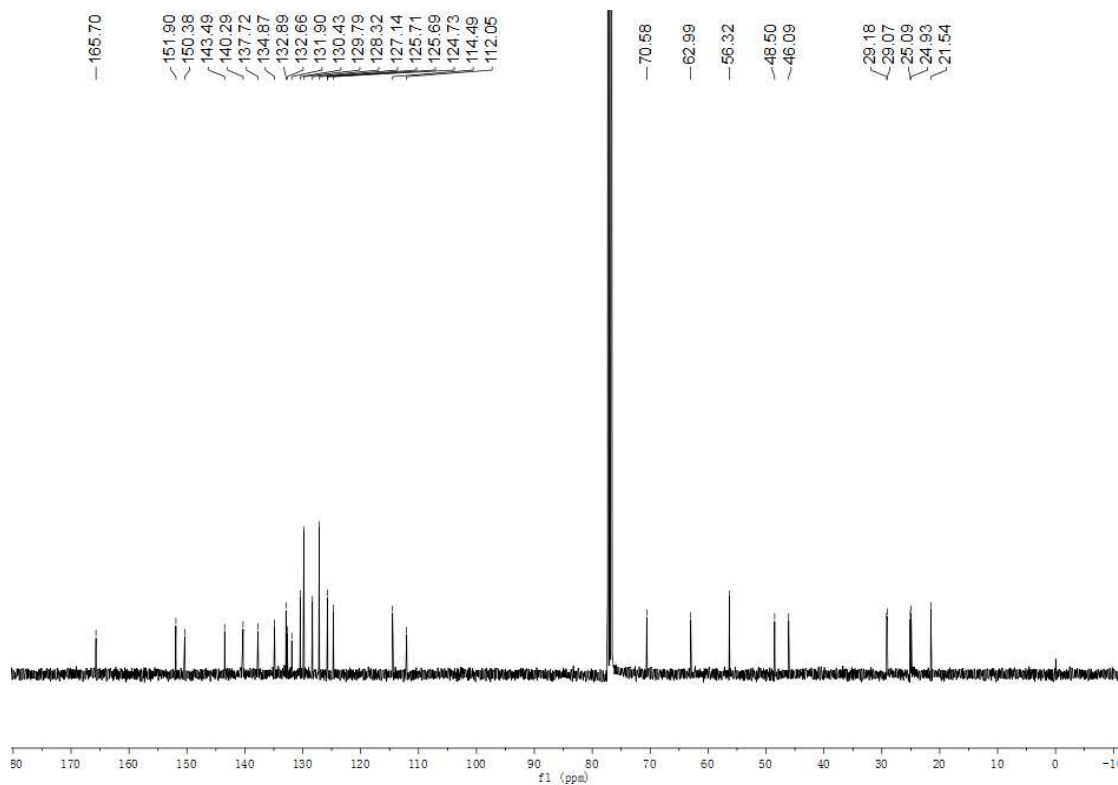

### <sup>1</sup>H NMR (400 MHz, CDCl<sub>3</sub>) spectra of 3k

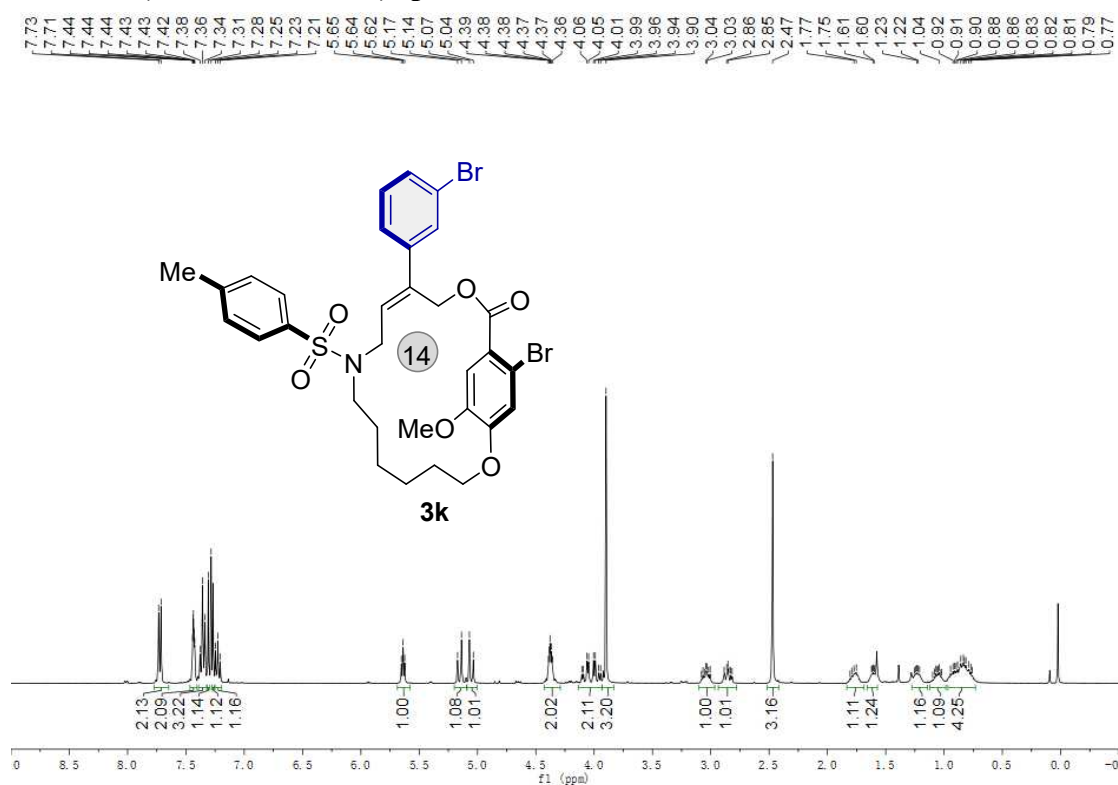

### <sup>13</sup>C NMR (100 MHz, CDCl<sub>3</sub>) spectra of 3k

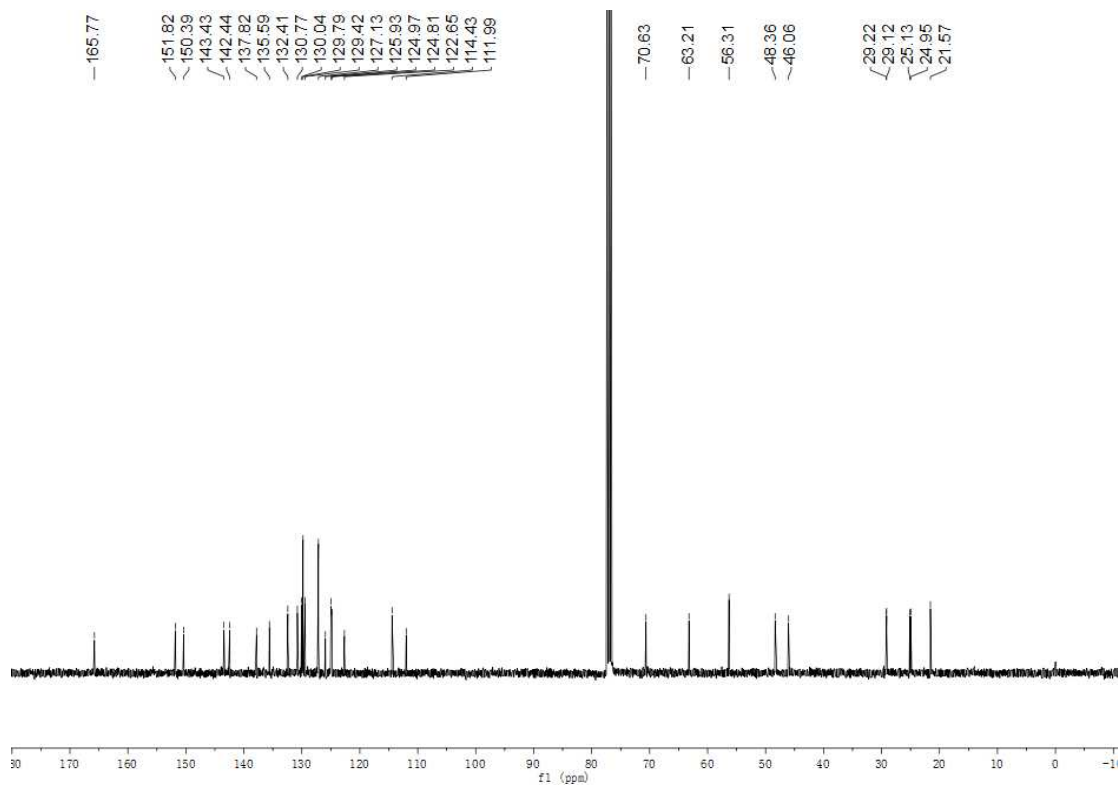

### <sup>1</sup>H NMR (400 MHz, CDCl<sub>3</sub>) spectra of 3l

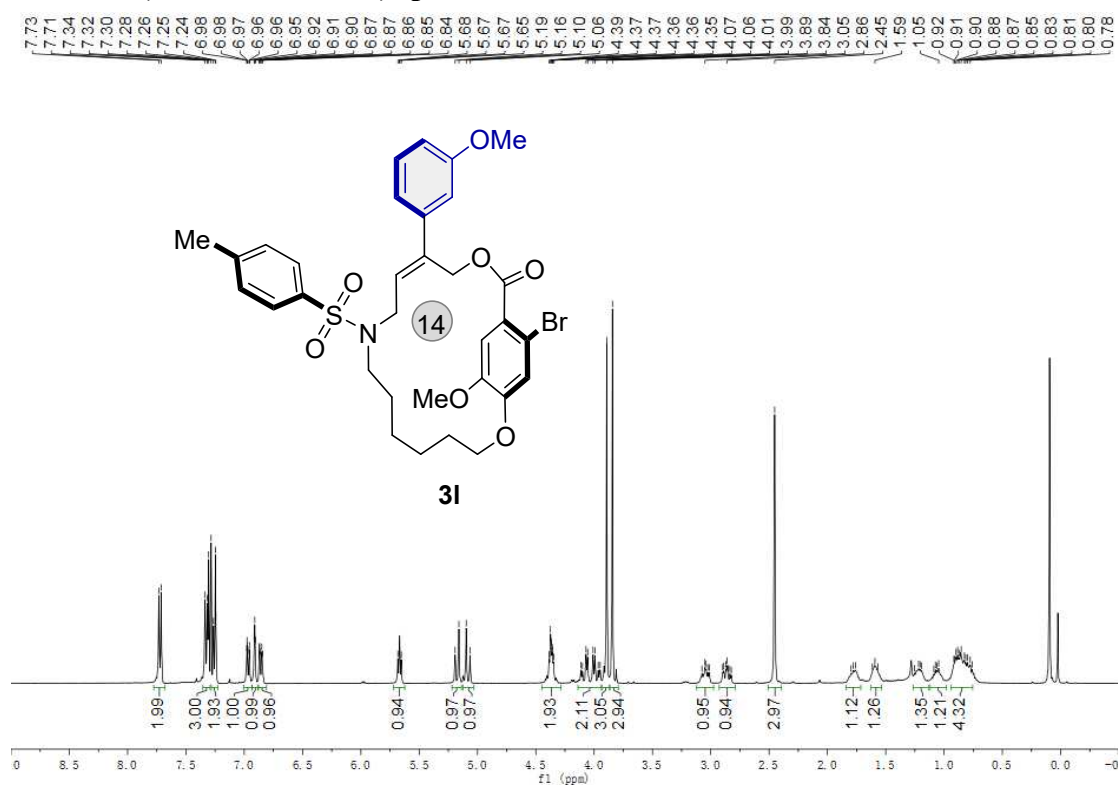

### <sup>13</sup>C NMR (100 MHz, CDCl<sub>3</sub>) spectra of 3l

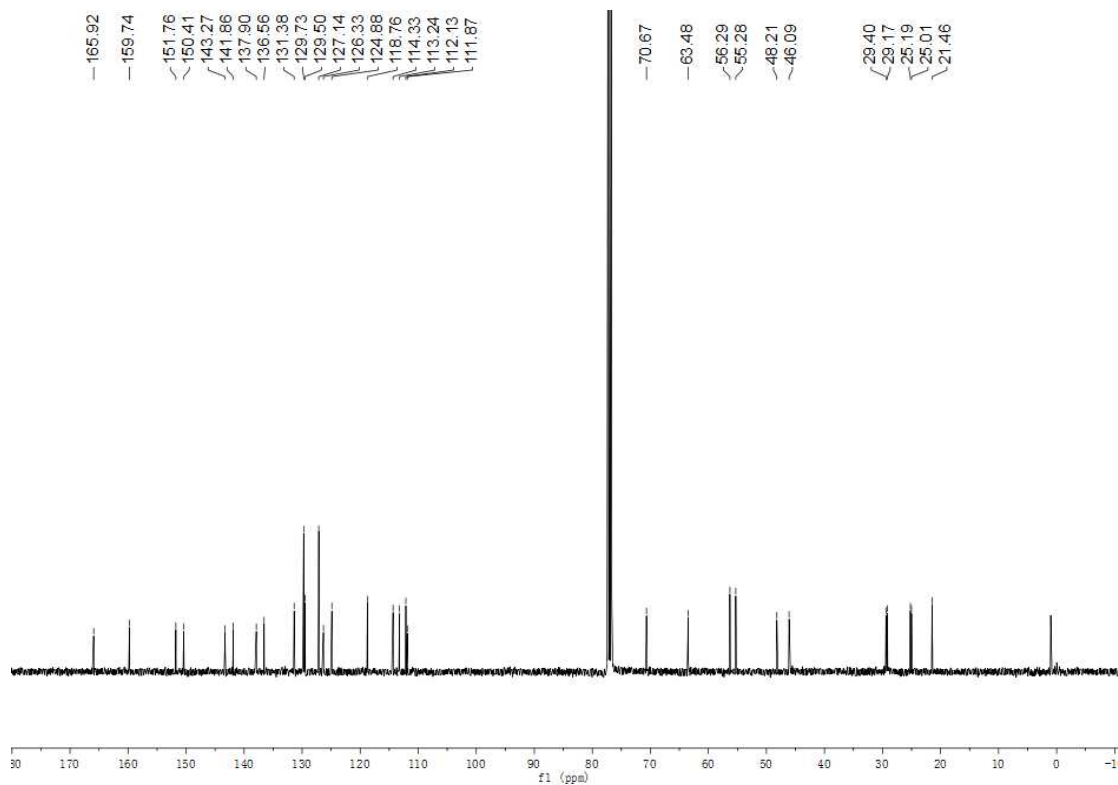

### <sup>1</sup>H NMR (400 MHz, CDCl<sub>3</sub>) spectra of 3m

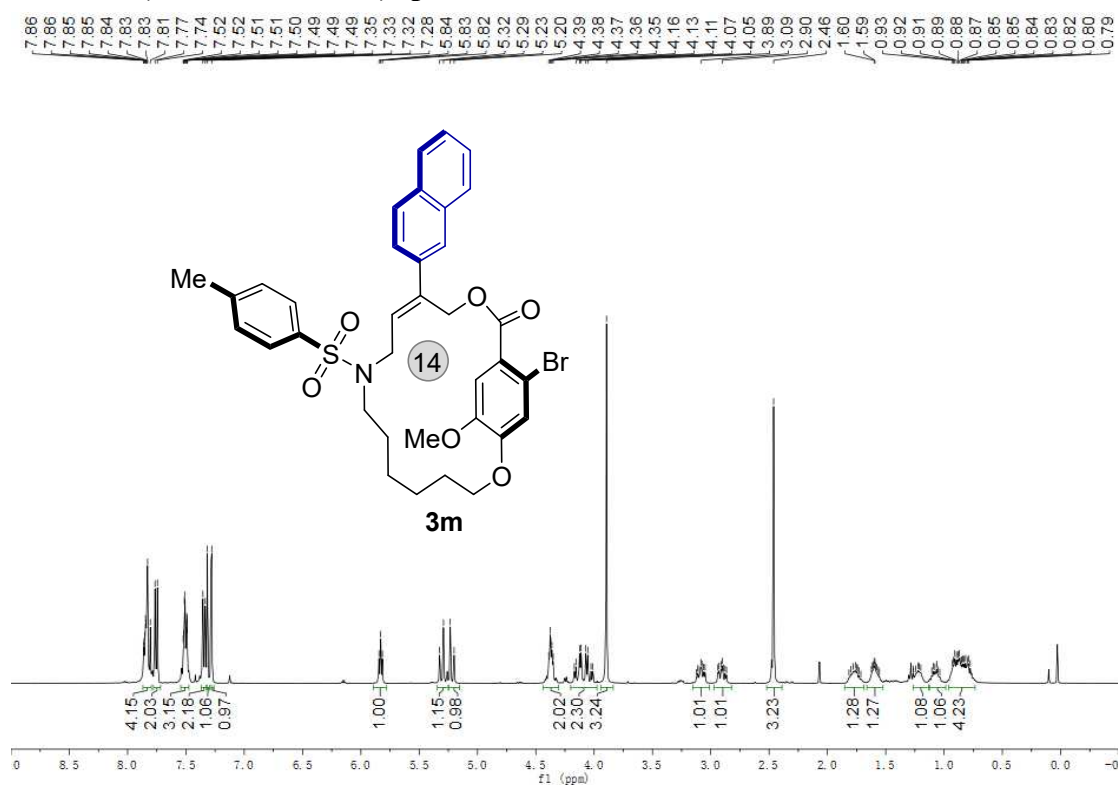

### <sup>13</sup>C NMR (100 MHz, CDCl<sub>3</sub>) spectra of 3m

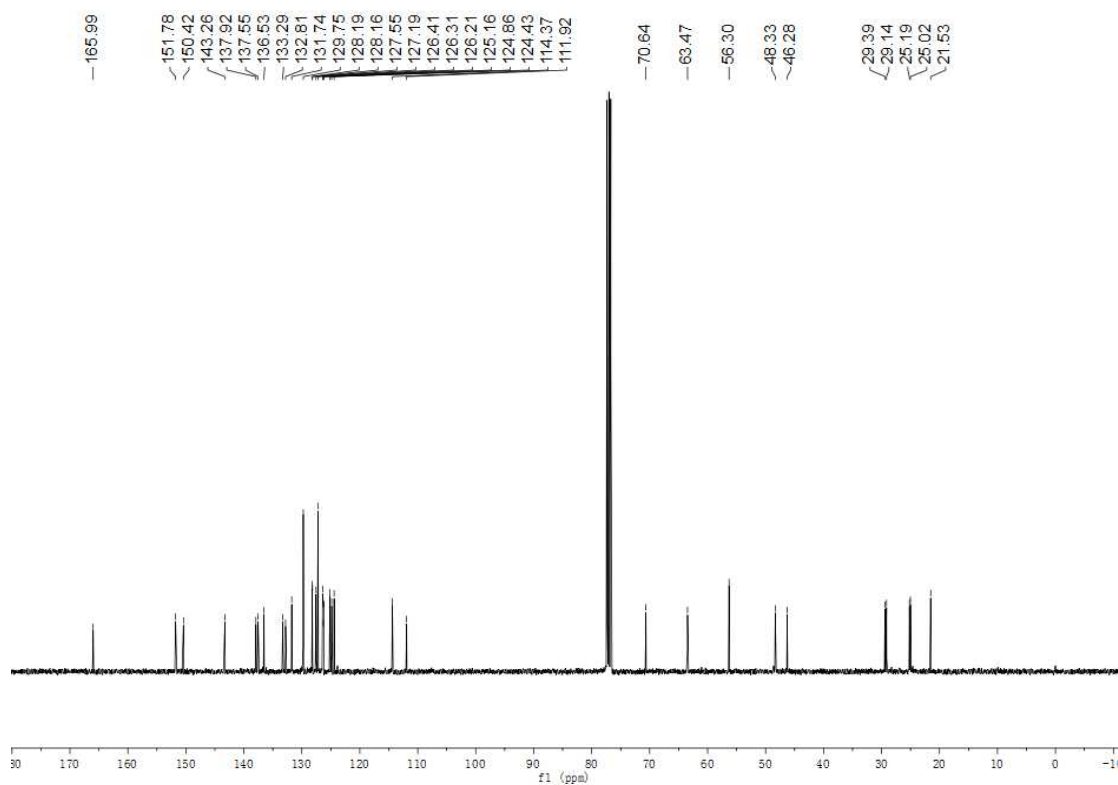

**<sup>1</sup>H NMR (400 MHz, CDCl<sub>3</sub>) spectra of 3n**

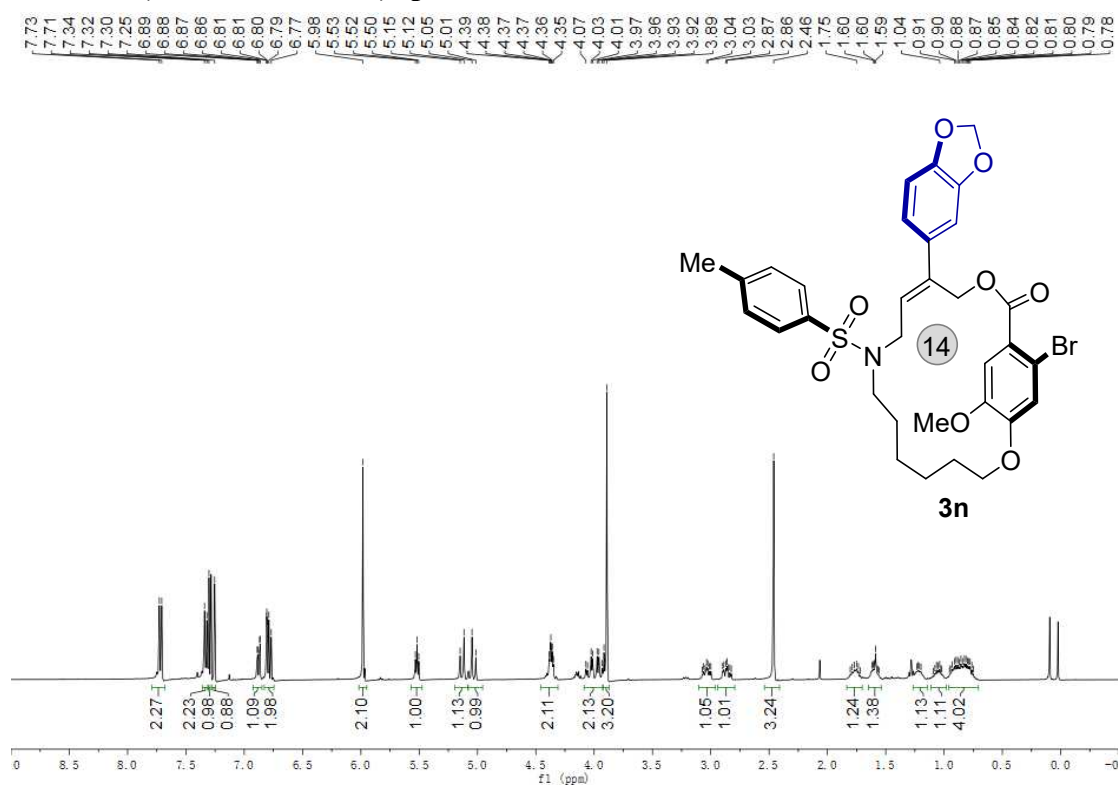

**<sup>13</sup>C NMR (100 MHz, CDCl<sub>3</sub>) spectra of 3n**

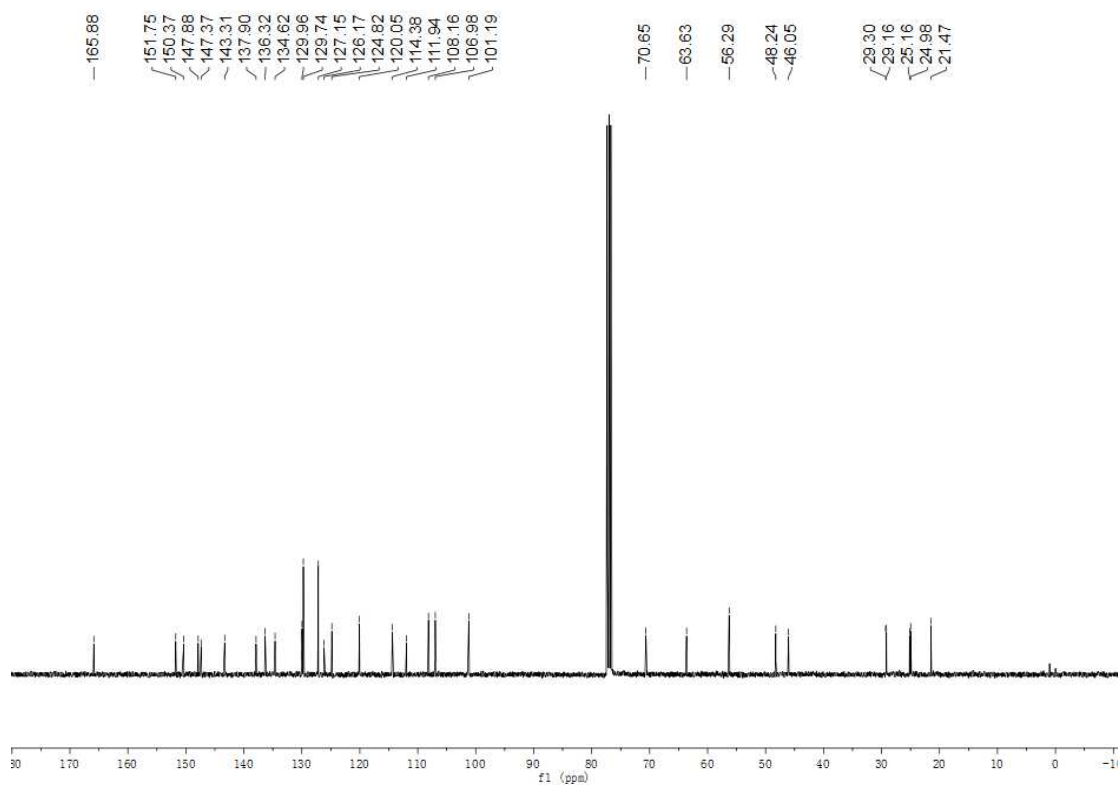



### <sup>1</sup>H NMR (400 MHz, CDCl<sub>3</sub>) spectra of 3o

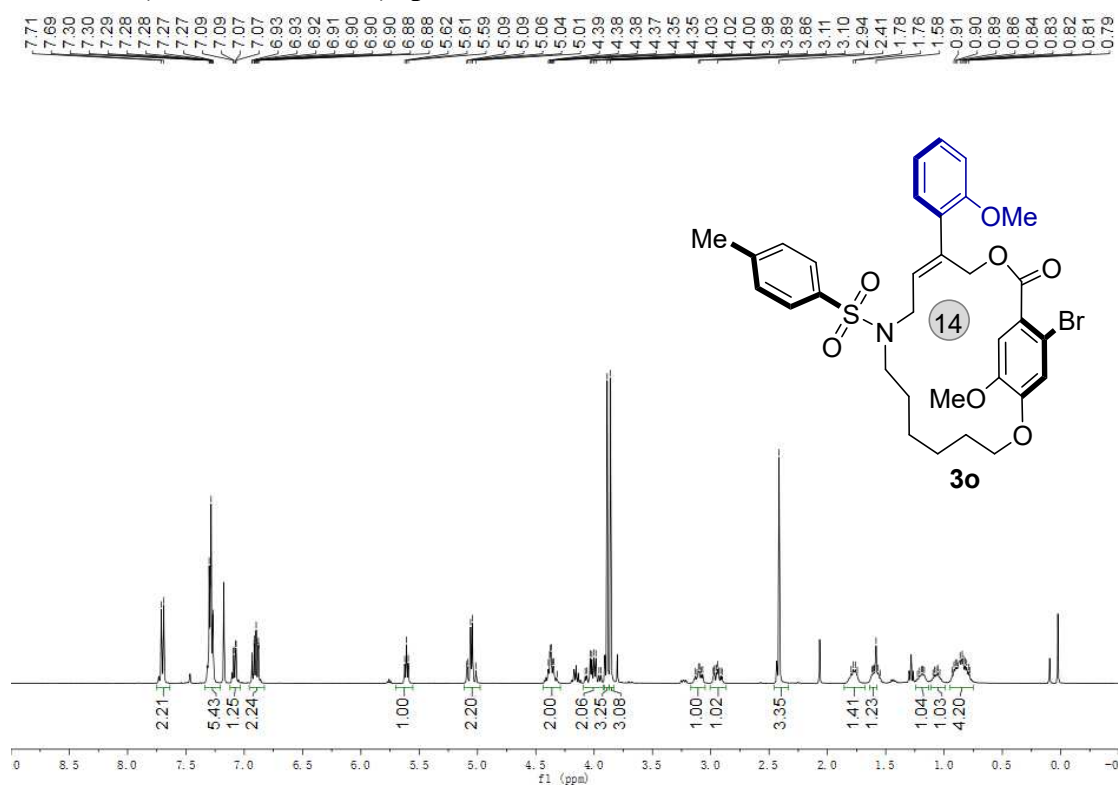

### <sup>13</sup>C NMR (100 MHz, CDCl<sub>3</sub>) spectra of 3o

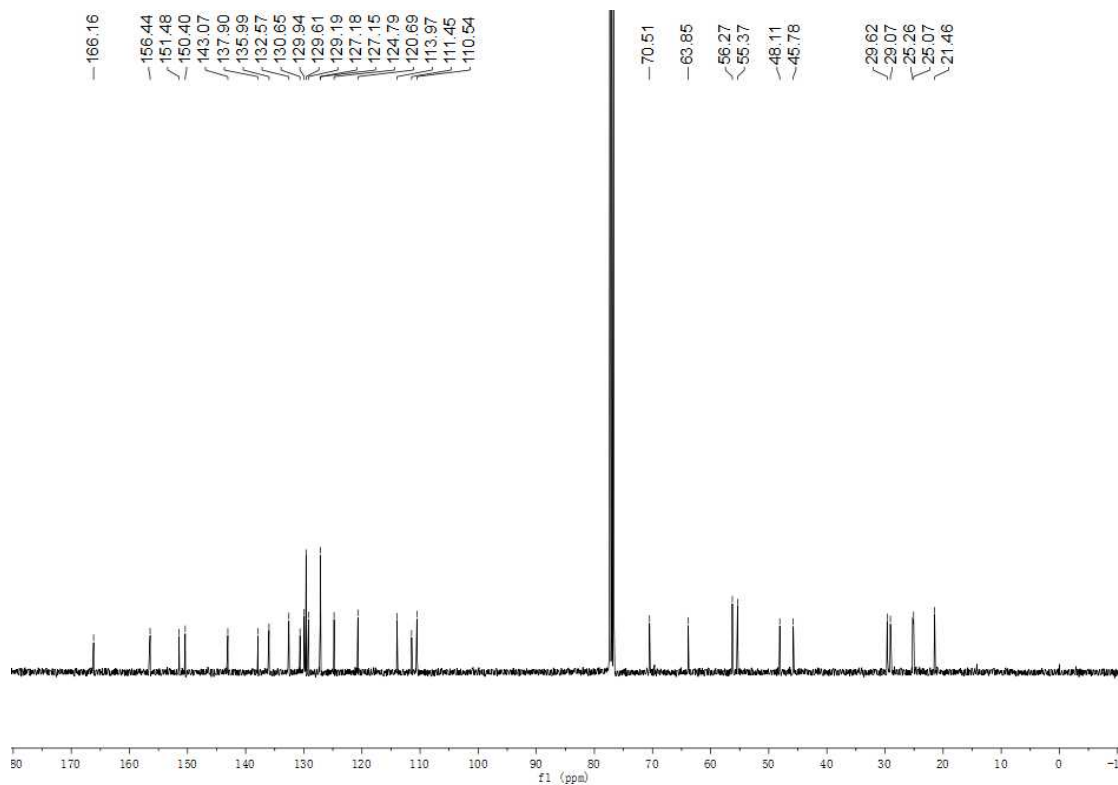

### <sup>1</sup>H NMR (400 MHz, CDCl<sub>3</sub>) spectra of 3p

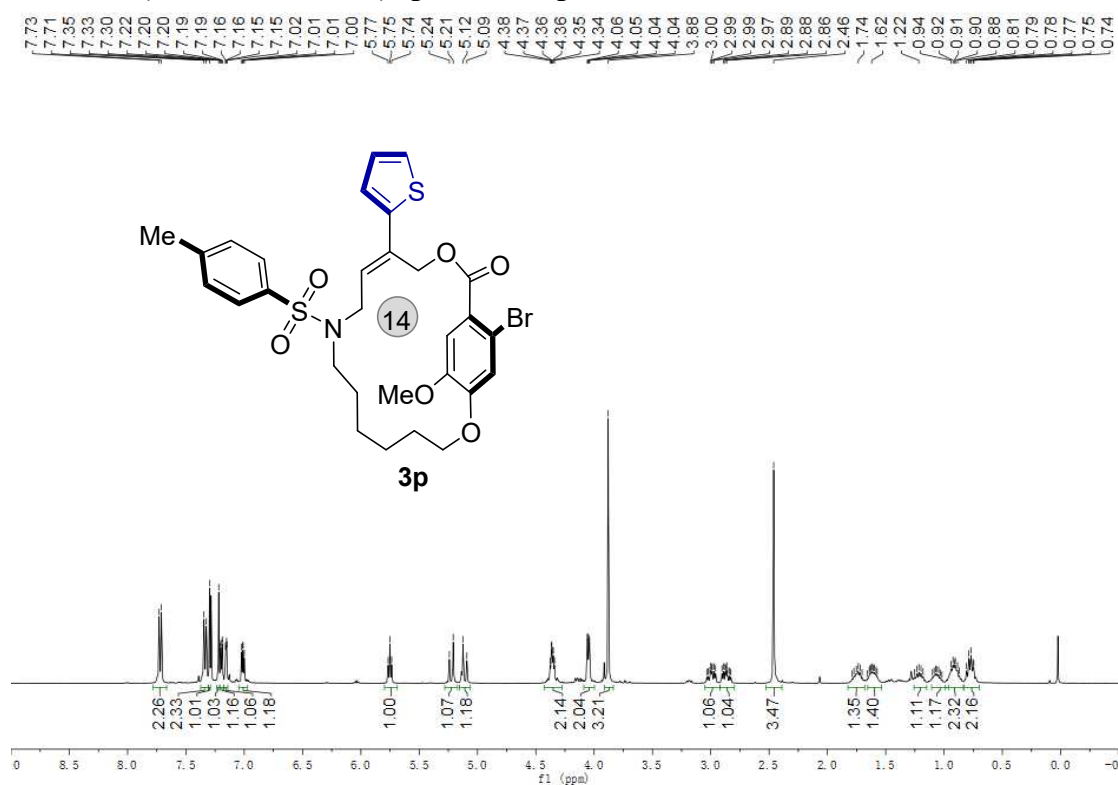

### <sup>13</sup>C NMR (100 MHz, CDCl<sub>3</sub>) spectra of 3p

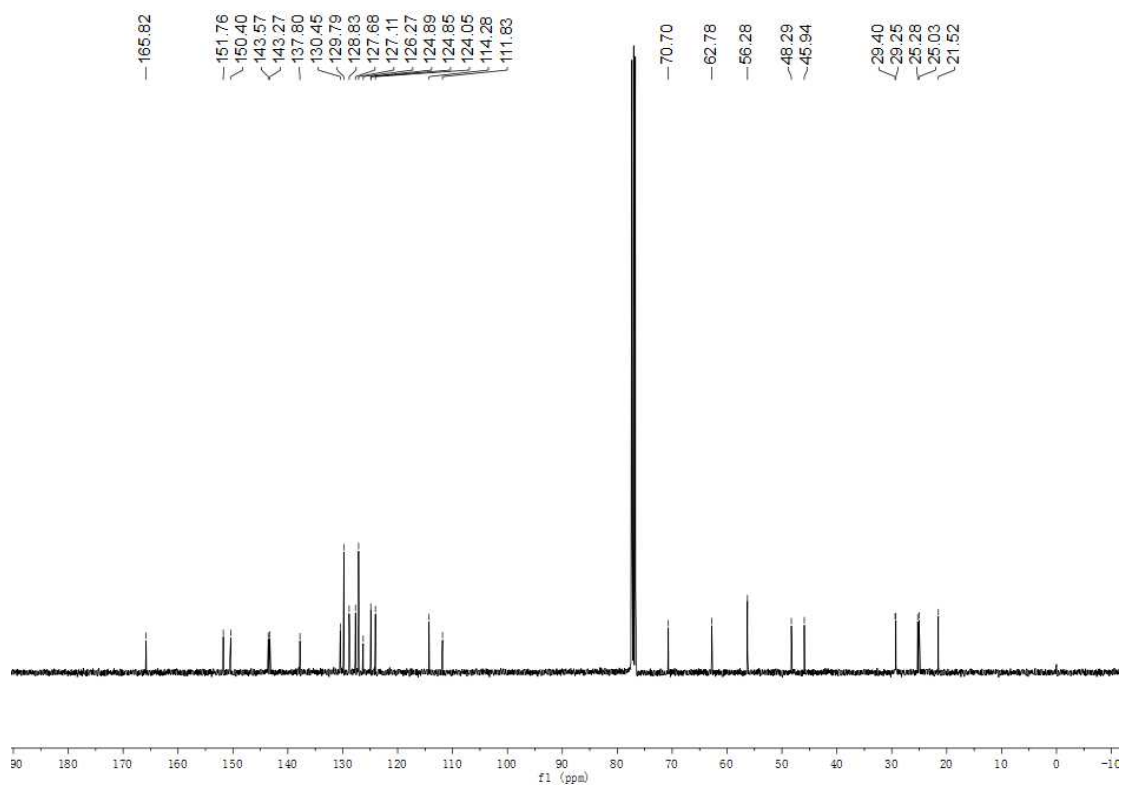

### <sup>1</sup>H NMR (400 MHz, CDCl<sub>3</sub>) spectra of 3q

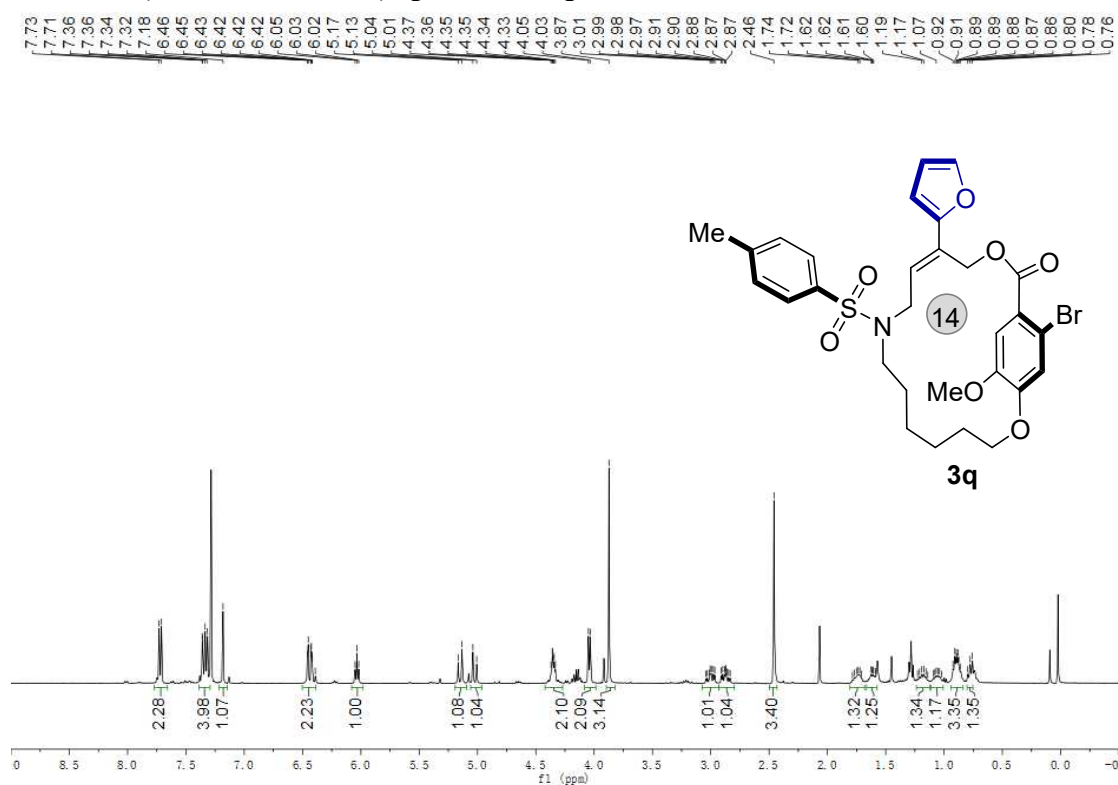

### <sup>13</sup>C NMR (100 MHz, CDCl<sub>3</sub>) spectra of 3q

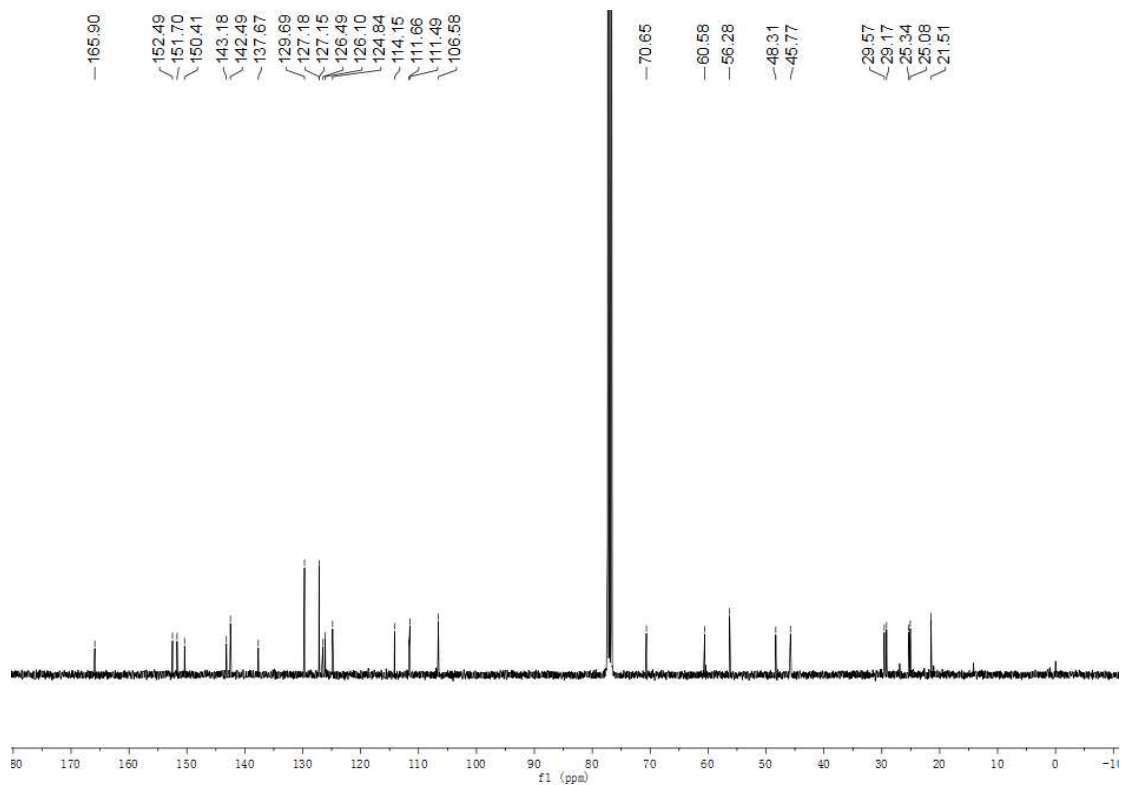

**<sup>1</sup>H NMR (400 MHz, CDCl<sub>3</sub>) spectra of 3r**

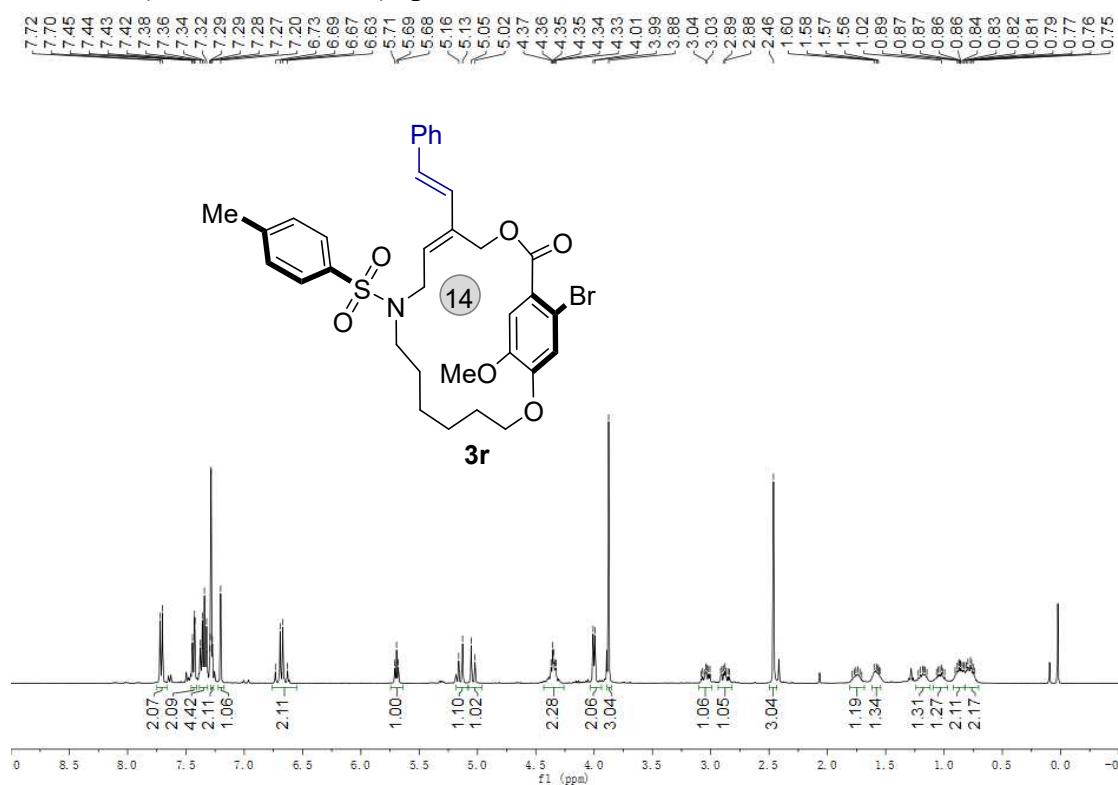

**<sup>13</sup>C NMR (100 MHz, CDCl<sub>3</sub>) spectra of 3r**

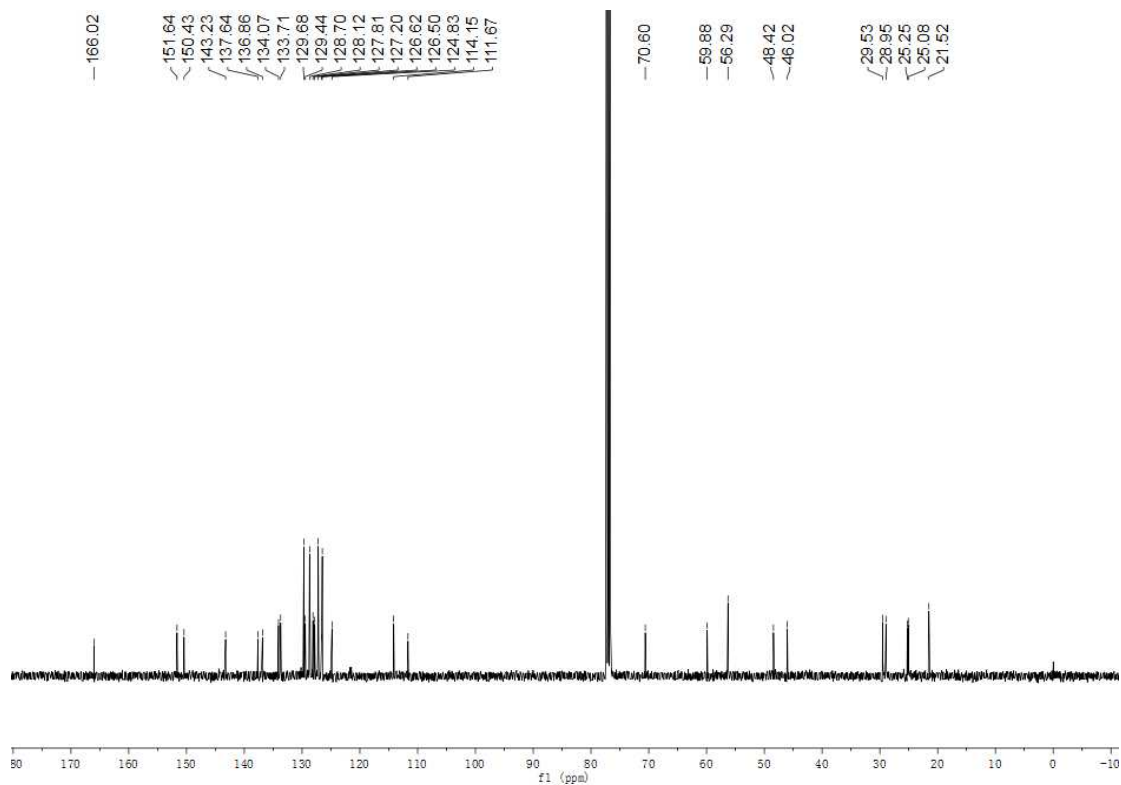

**<sup>1</sup>H NMR (400 MHz, CDCl<sub>3</sub>) spectra of 3s**

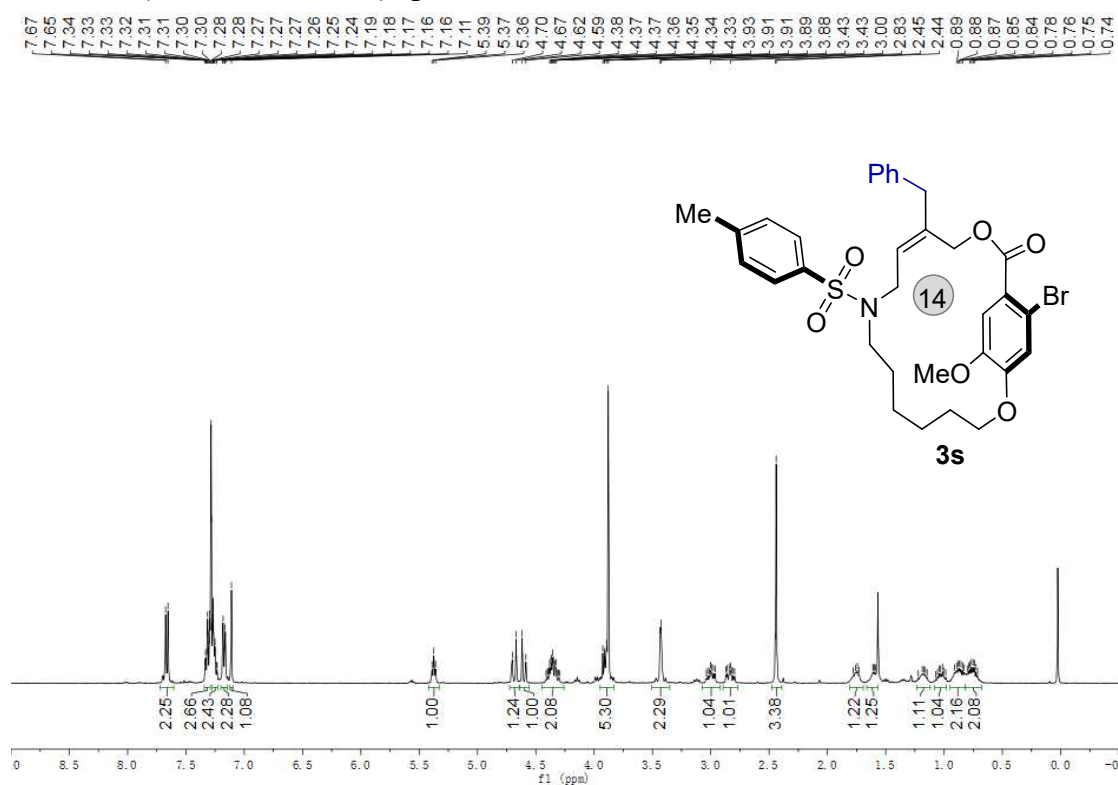

**<sup>13</sup>C NMR (100 MHz, CDCl<sub>3</sub>) spectra of 3s**

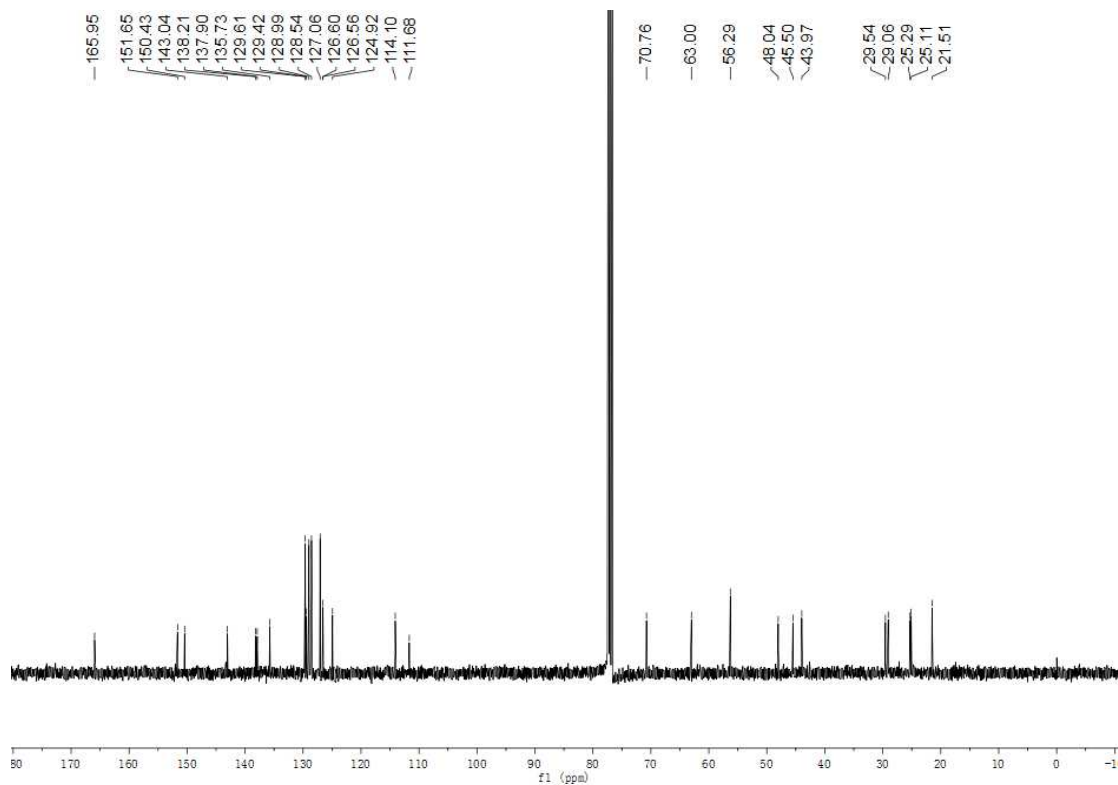

**<sup>1</sup>H NMR (400 MHz, CDCl<sub>3</sub>) spectra of 3t**

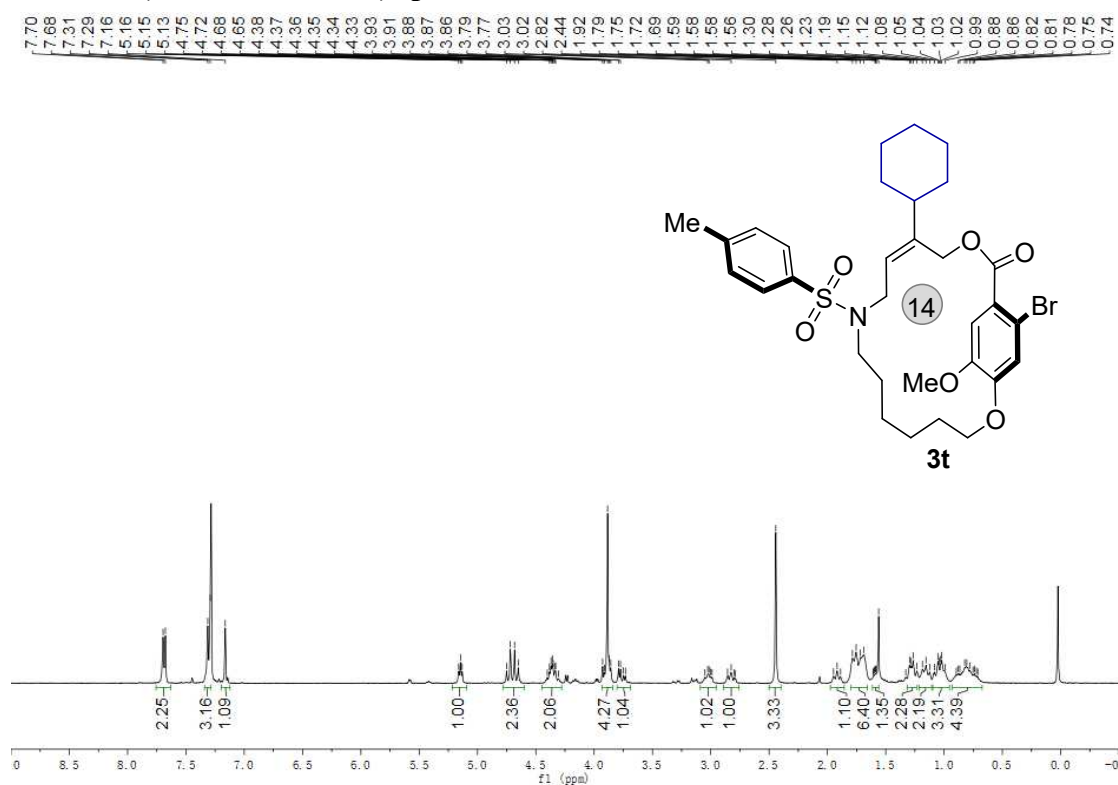

**<sup>13</sup>C NMR (100 MHz, CDCl<sub>3</sub>) spectra of 3t**

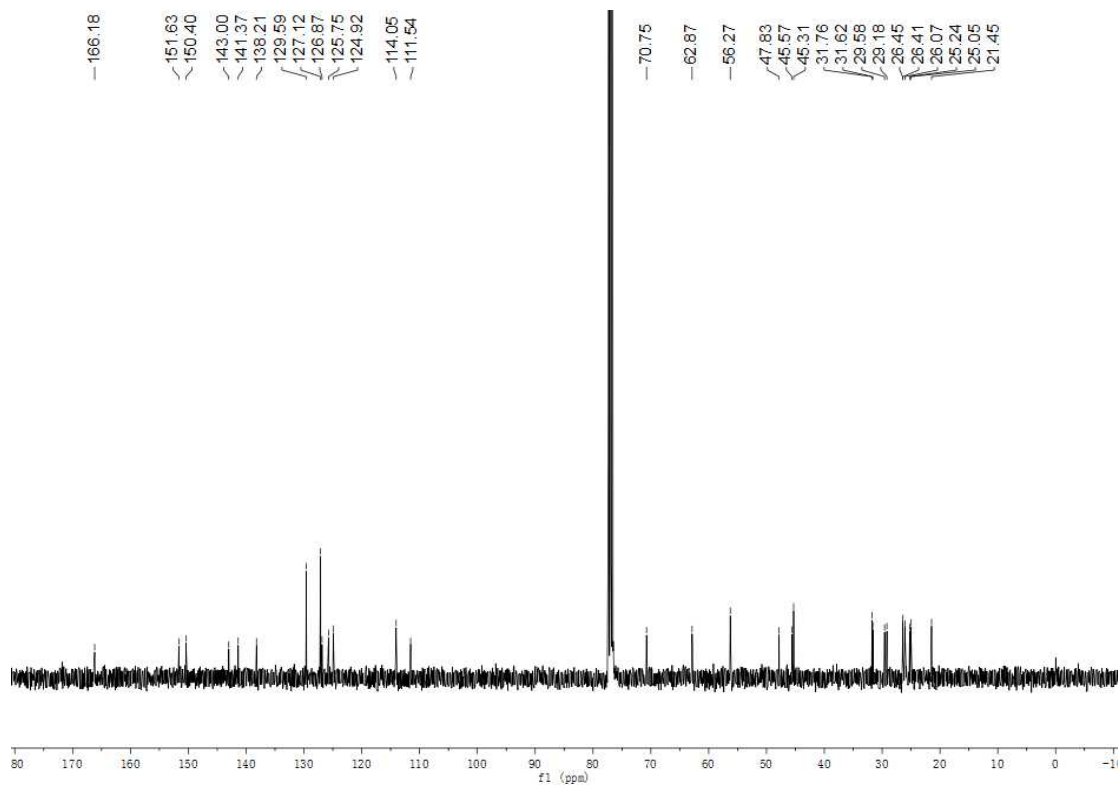

### <sup>1</sup>H NMR (400 MHz, CDCl<sub>3</sub>) spectra of 4a

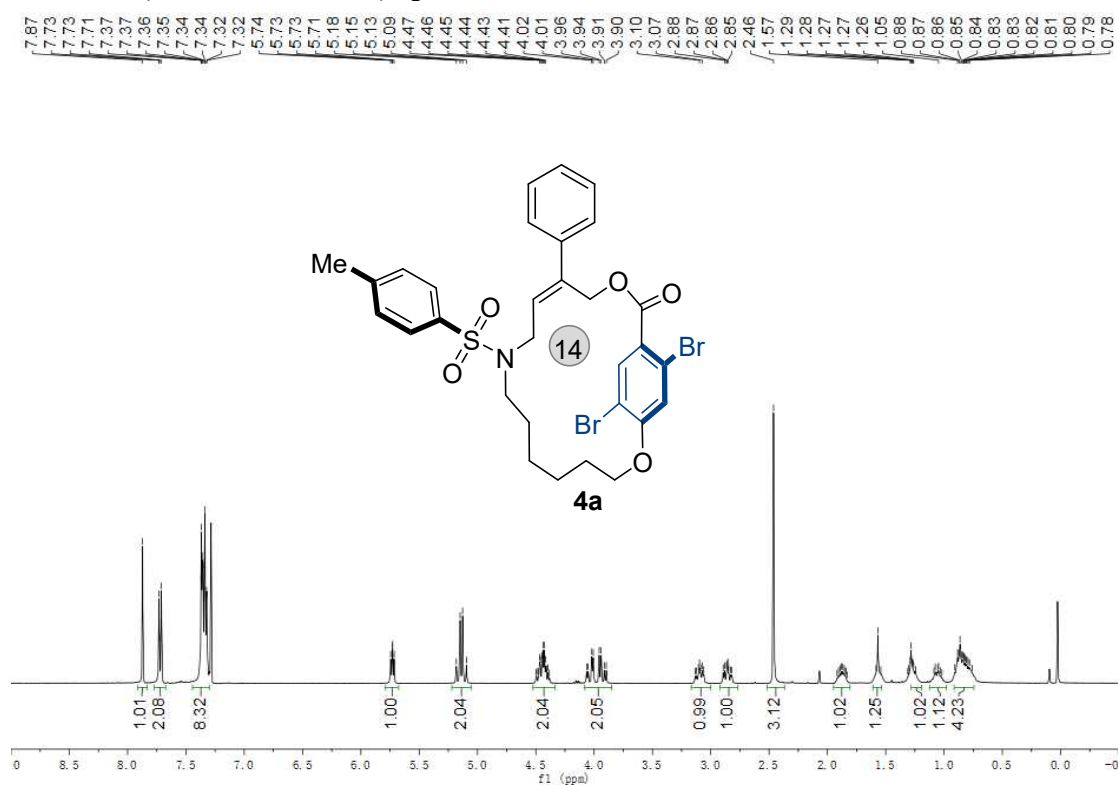

### <sup>13</sup>C NMR (100 MHz, CDCl<sub>3</sub>) spectra of 4a

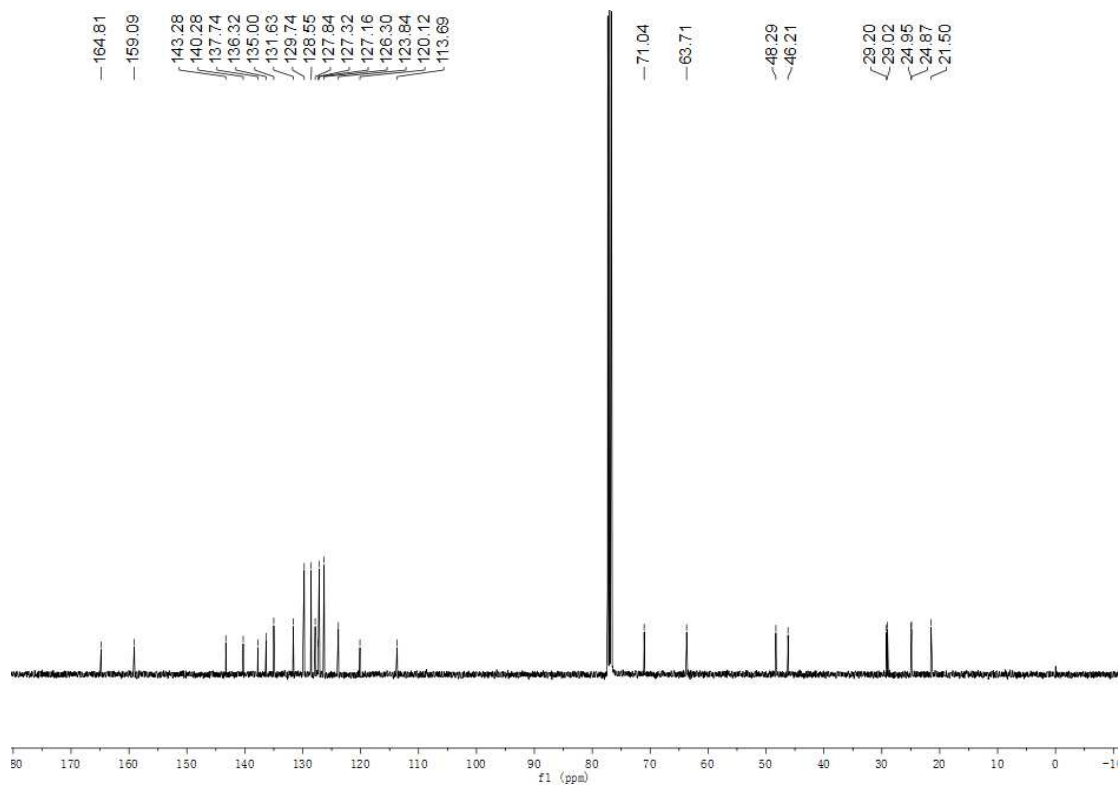

### $^1\text{H}$ NMR (400 MHz, $\text{CDCl}_3$ ) spectra of 4b

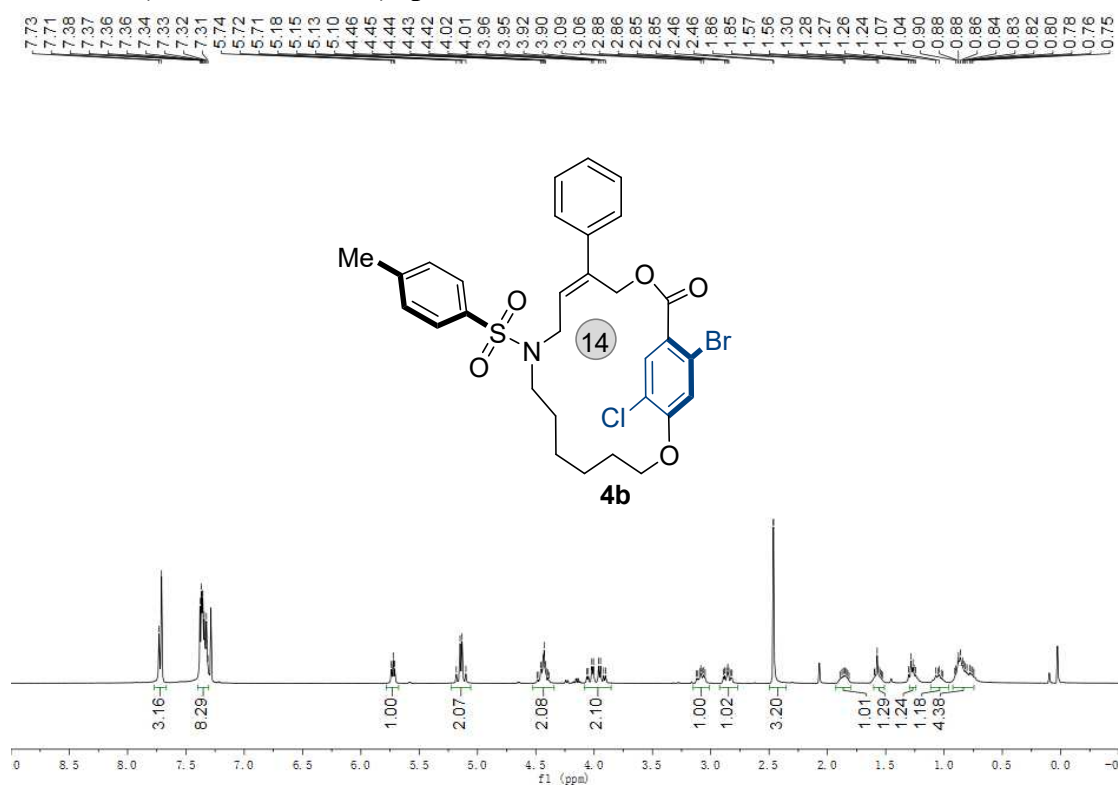

### $^{13}\text{C}$ NMR (100 MHz, $\text{CDCl}_3$ ) spectra of 4b

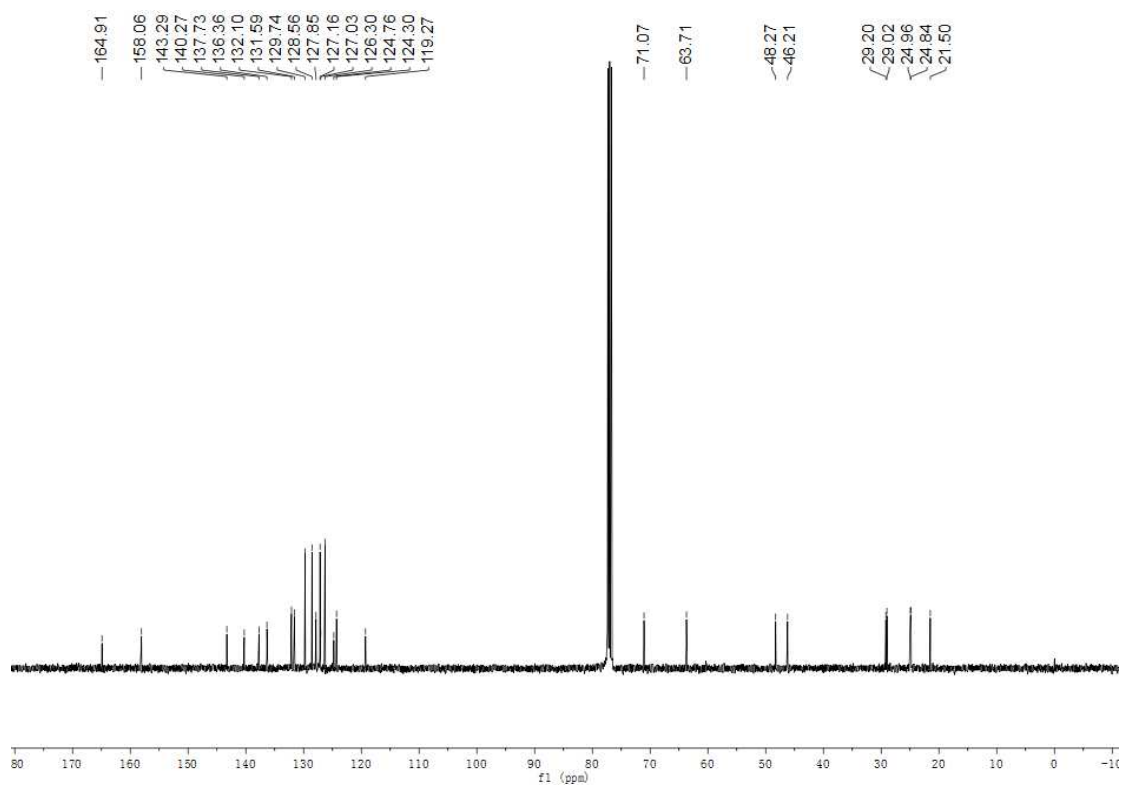



### <sup>1</sup>H NMR (400 MHz, CDCl<sub>3</sub>) spectra of 4c

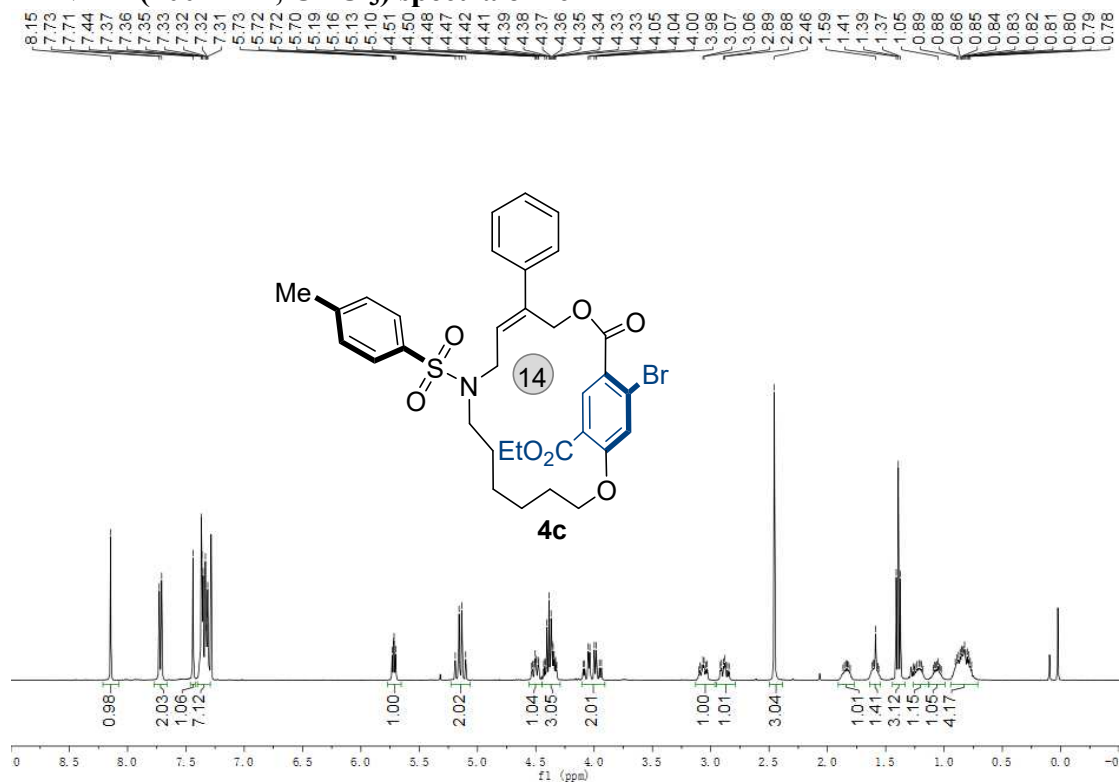

### <sup>13</sup>C NMR (100 MHz, CDCl<sub>3</sub>) spectra of 4c

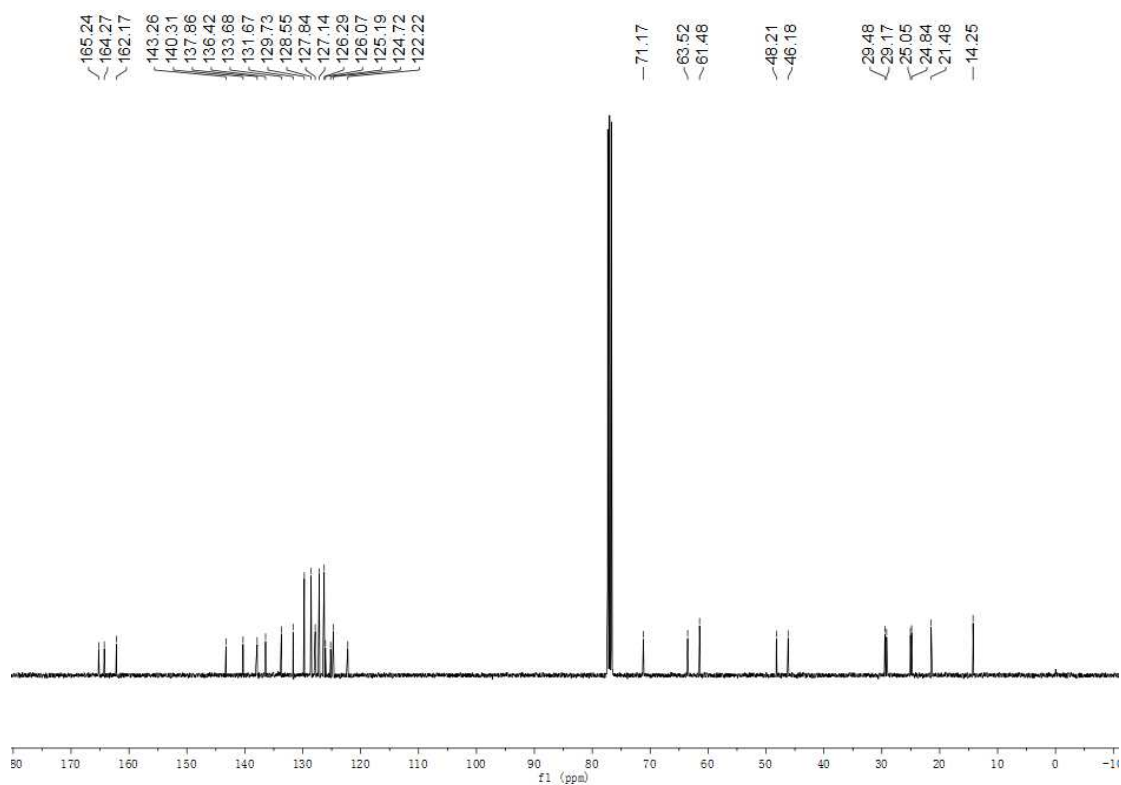

**<sup>1</sup>H NMR (400 MHz, CDCl<sub>3</sub>) spectra of 4d**

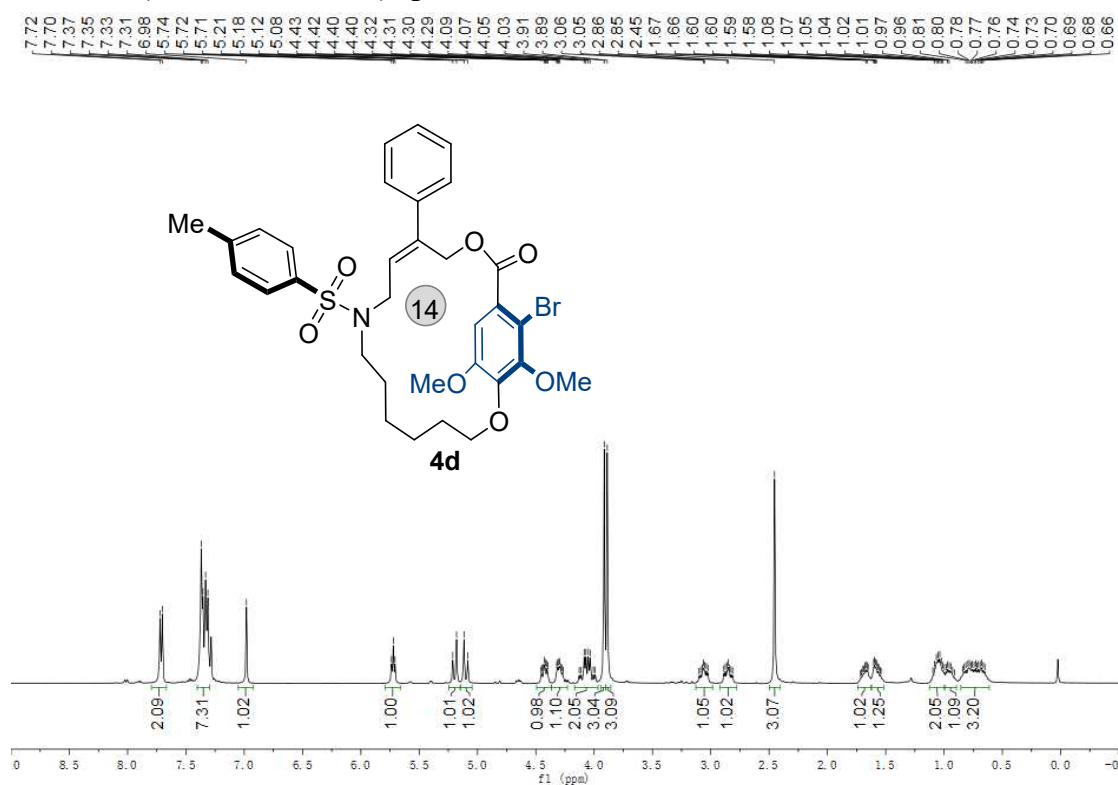

**<sup>13</sup>C NMR (100 MHz, CDCl<sub>3</sub>) spectra of 4d**

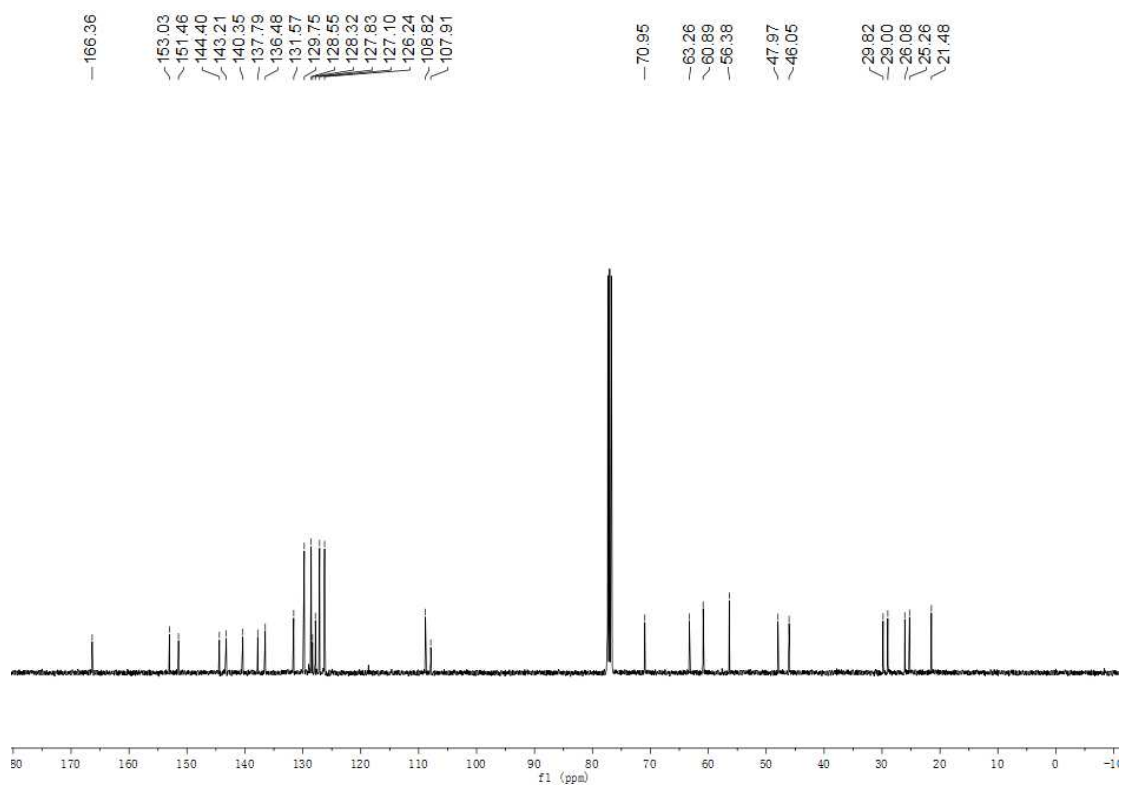

### <sup>1</sup>H NMR (400 MHz, CDCl<sub>3</sub>) spectra of 4e

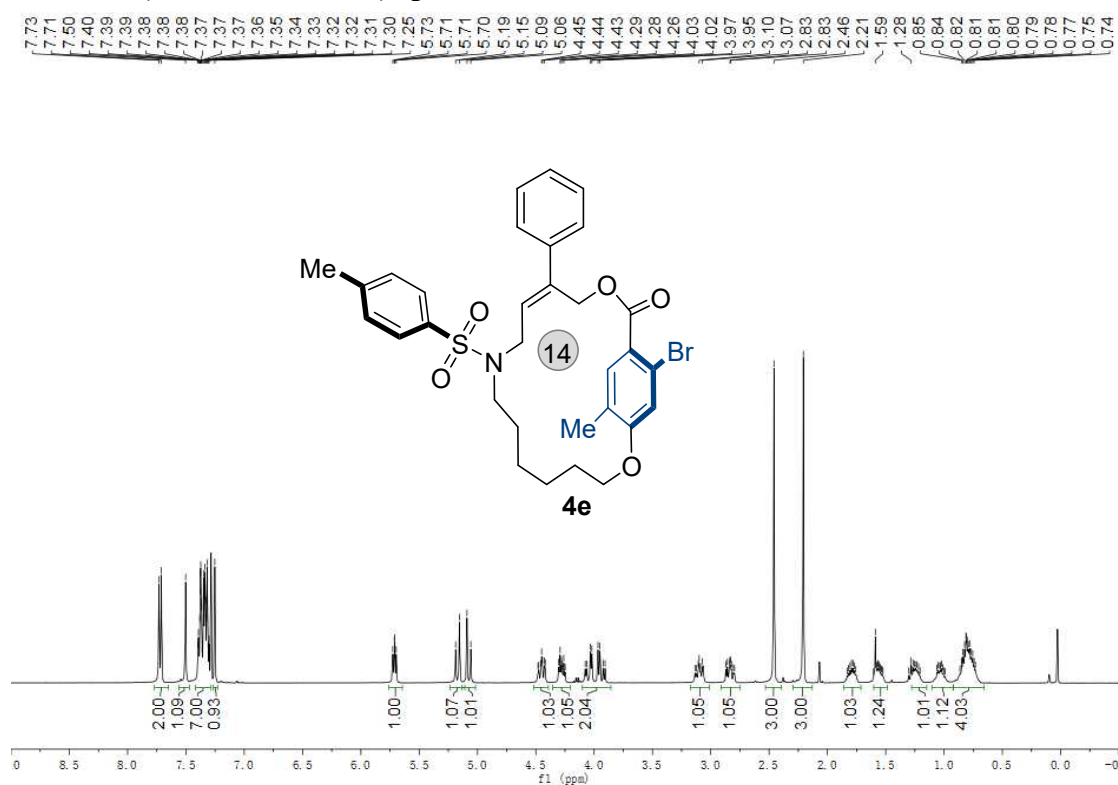

### <sup>13</sup>C NMR (100 MHz, CDCl<sub>3</sub>) spectra of 4e

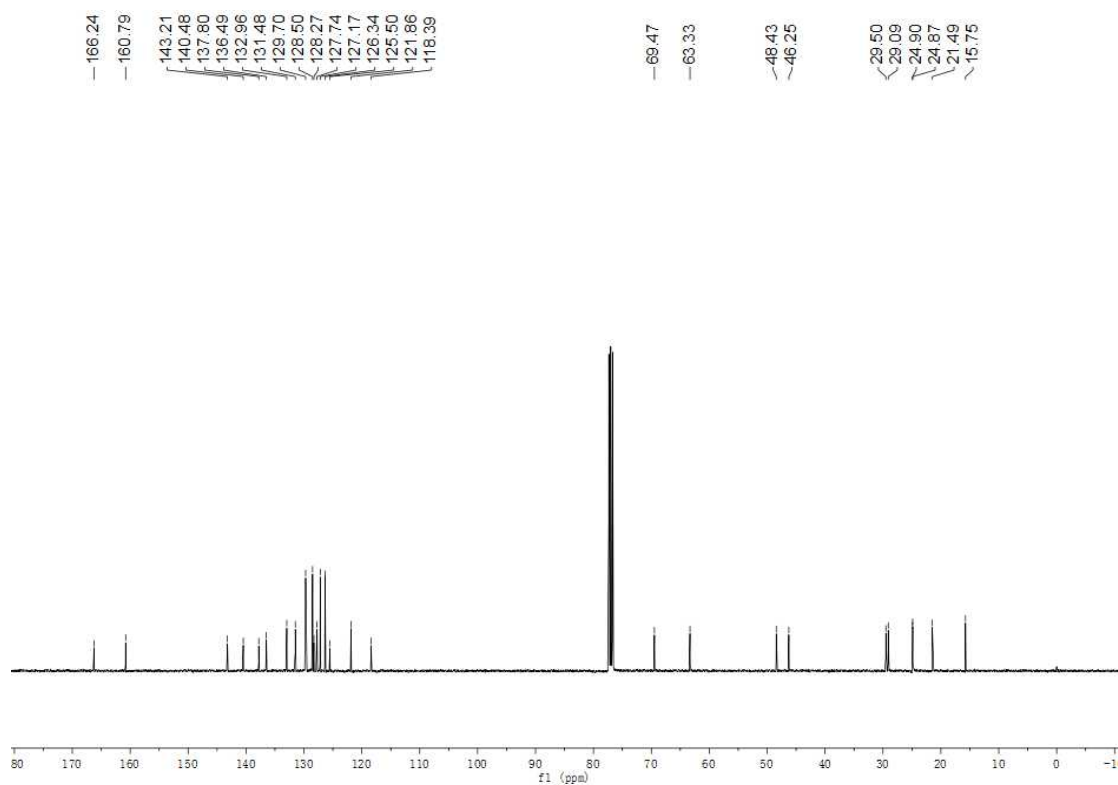

### <sup>1</sup>H NMR (400 MHz, CDCl<sub>3</sub>) spectra of 4f

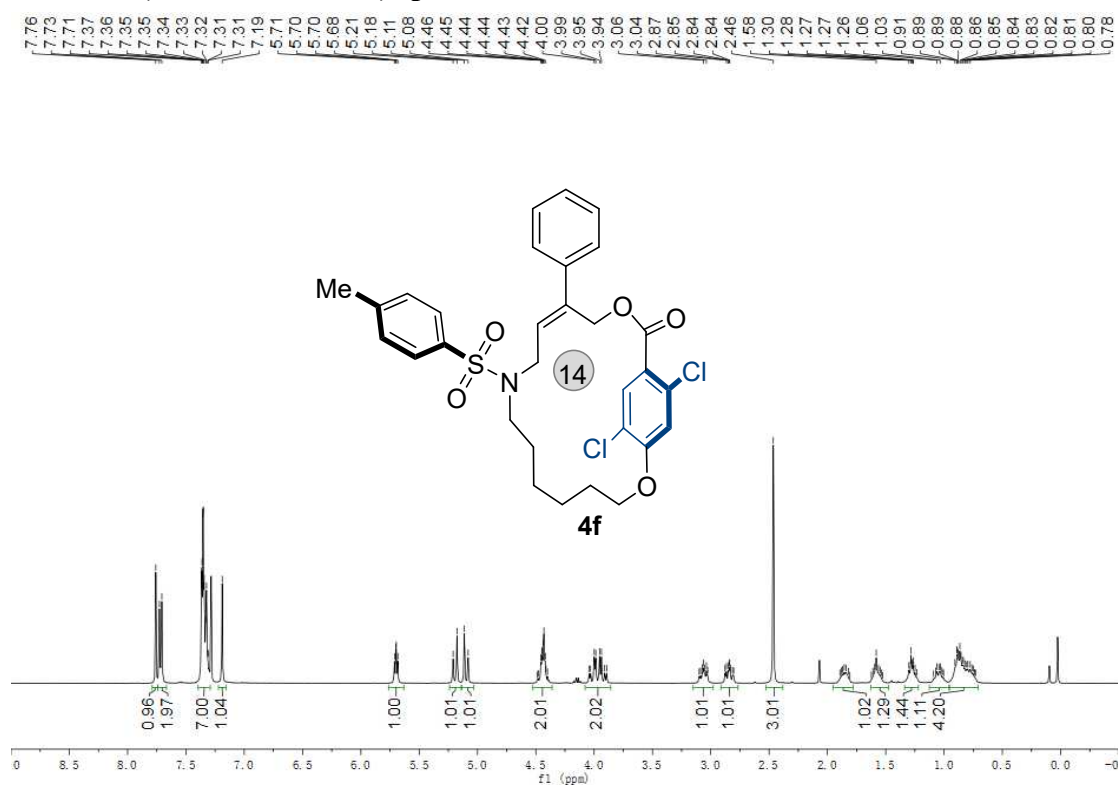

### <sup>13</sup>C NMR (100 MHz, CDCl<sub>3</sub>) spectra of 4f

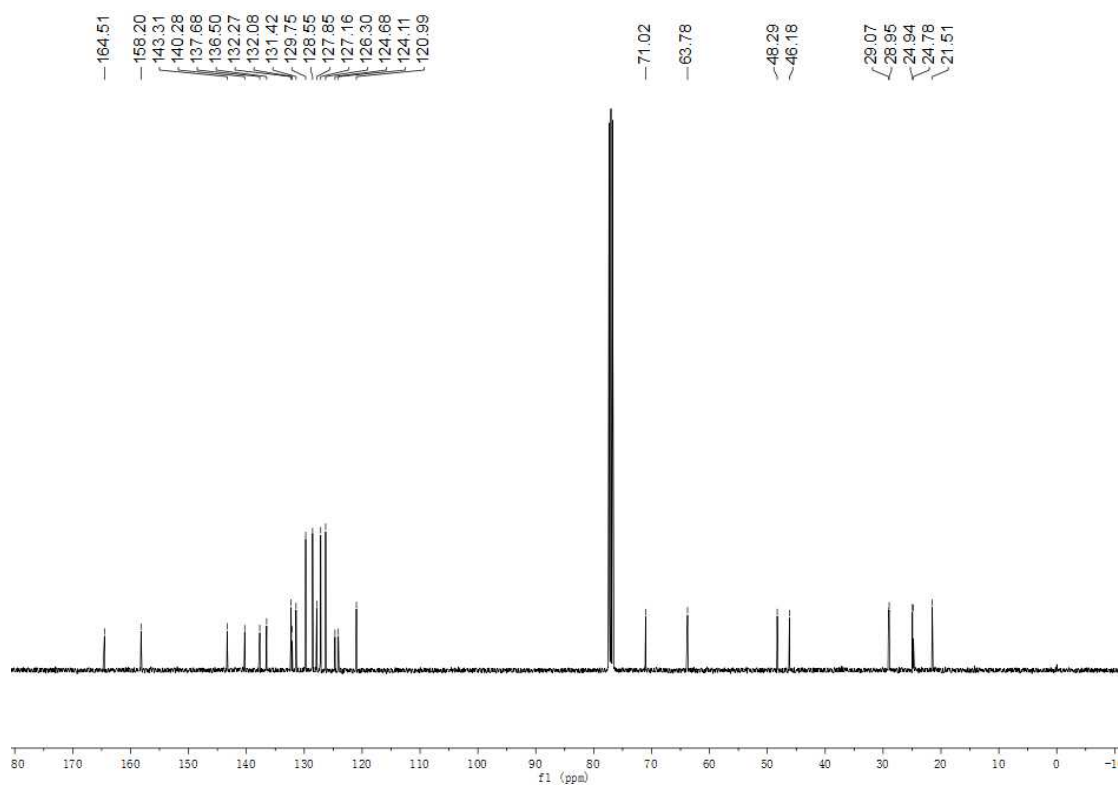

**<sup>1</sup>H NMR (400 MHz, CDCl<sub>3</sub>) spectra of 4g**

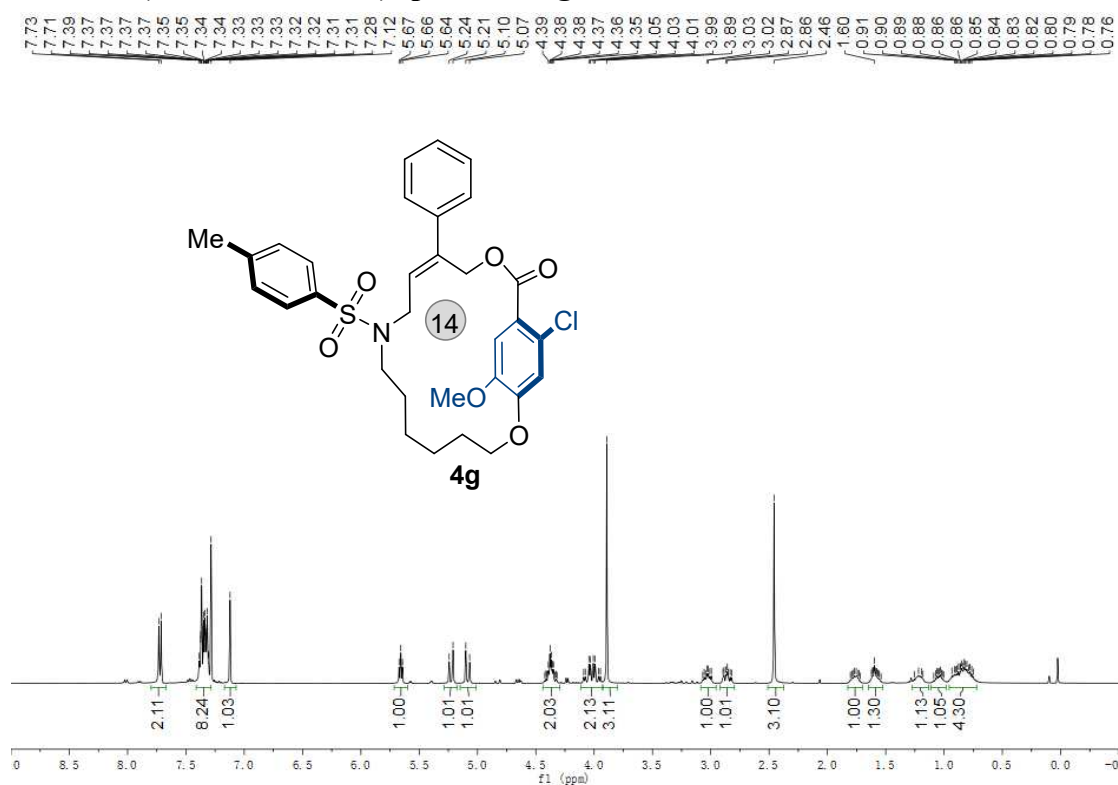

**<sup>13</sup>C NMR (100 MHz, CDCl<sub>3</sub>) spectra of 4g**

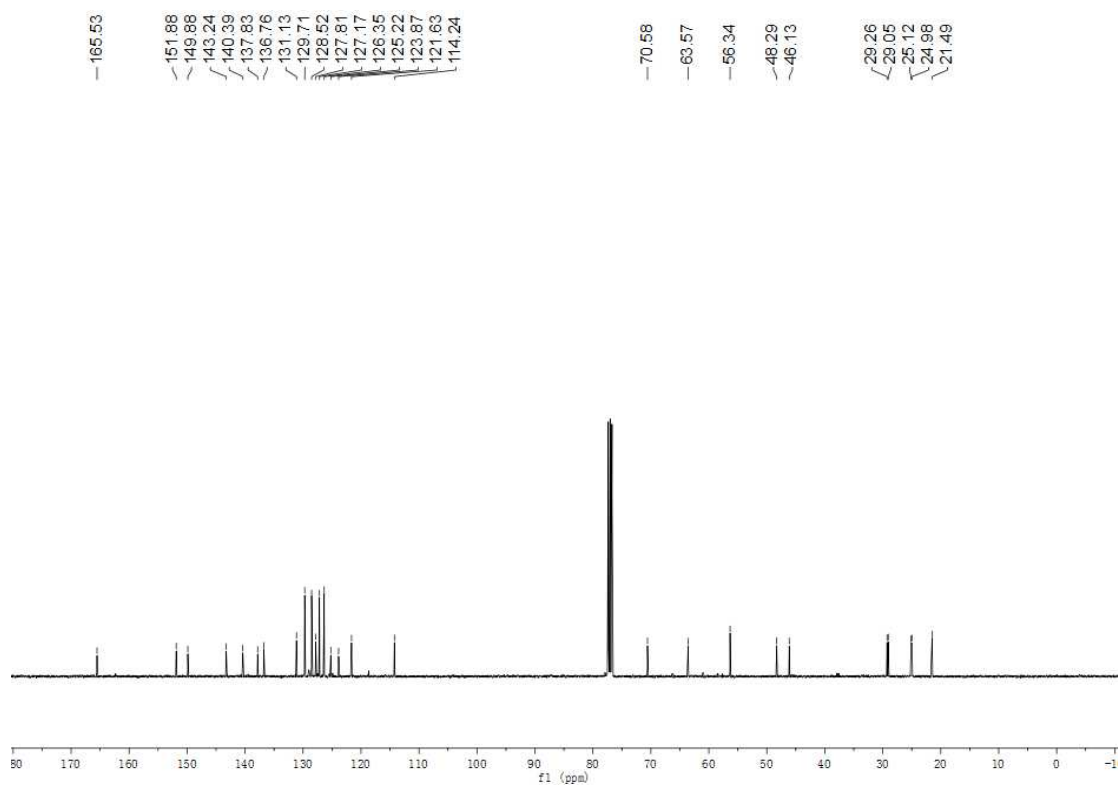

### <sup>1</sup>H NMR (400 MHz, CDCl<sub>3</sub>) spectra of 4h

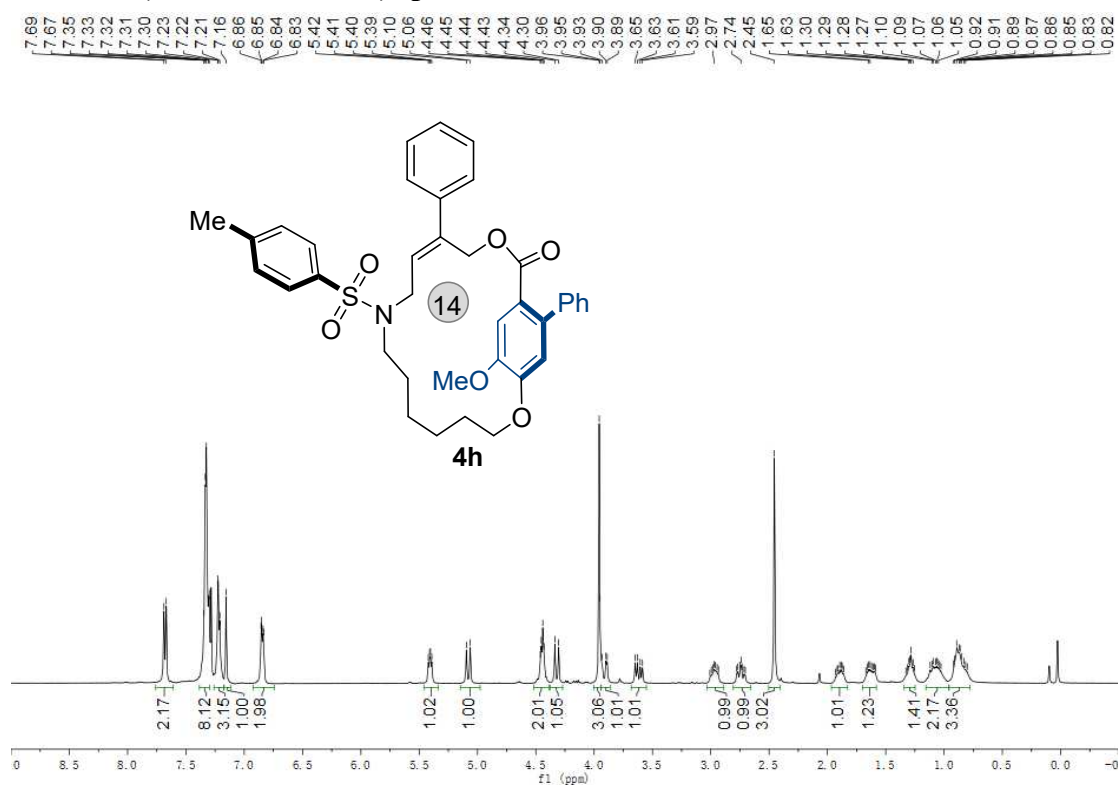

### <sup>13</sup>C NMR (100 MHz, CDCl<sub>3</sub>) spectra of 4h

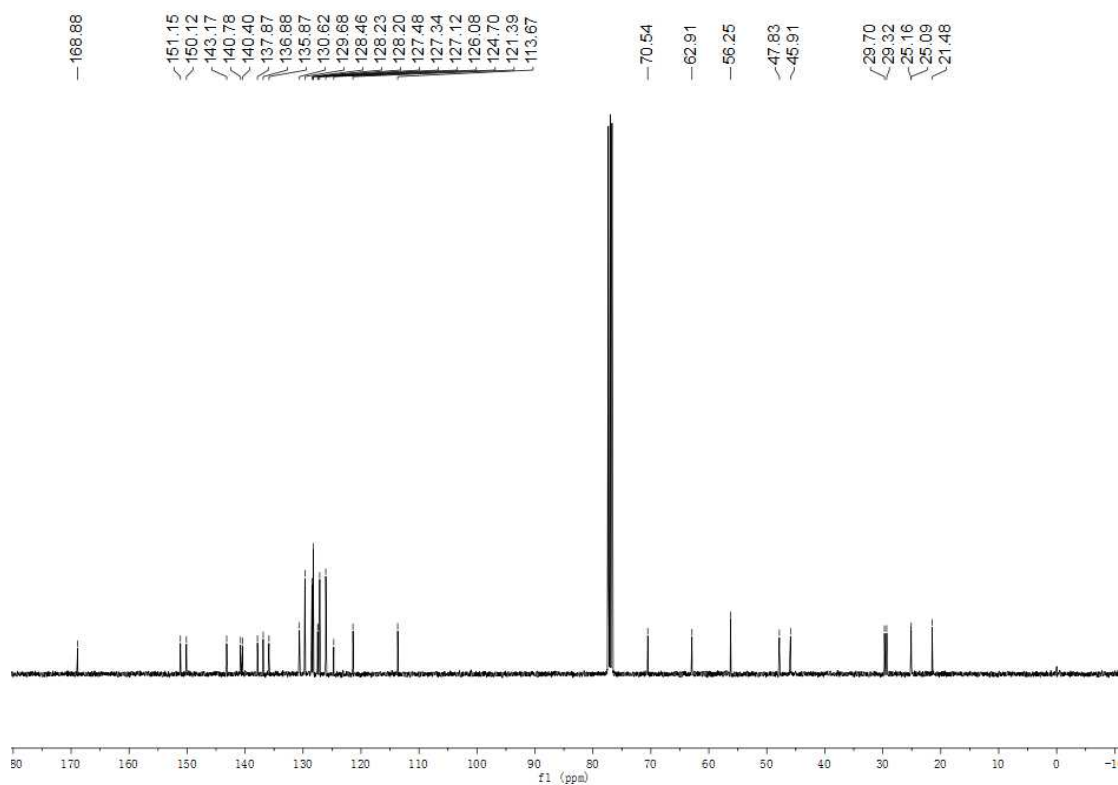

### <sup>1</sup>H NMR (400 MHz, CDCl<sub>3</sub>) spectra of 4i

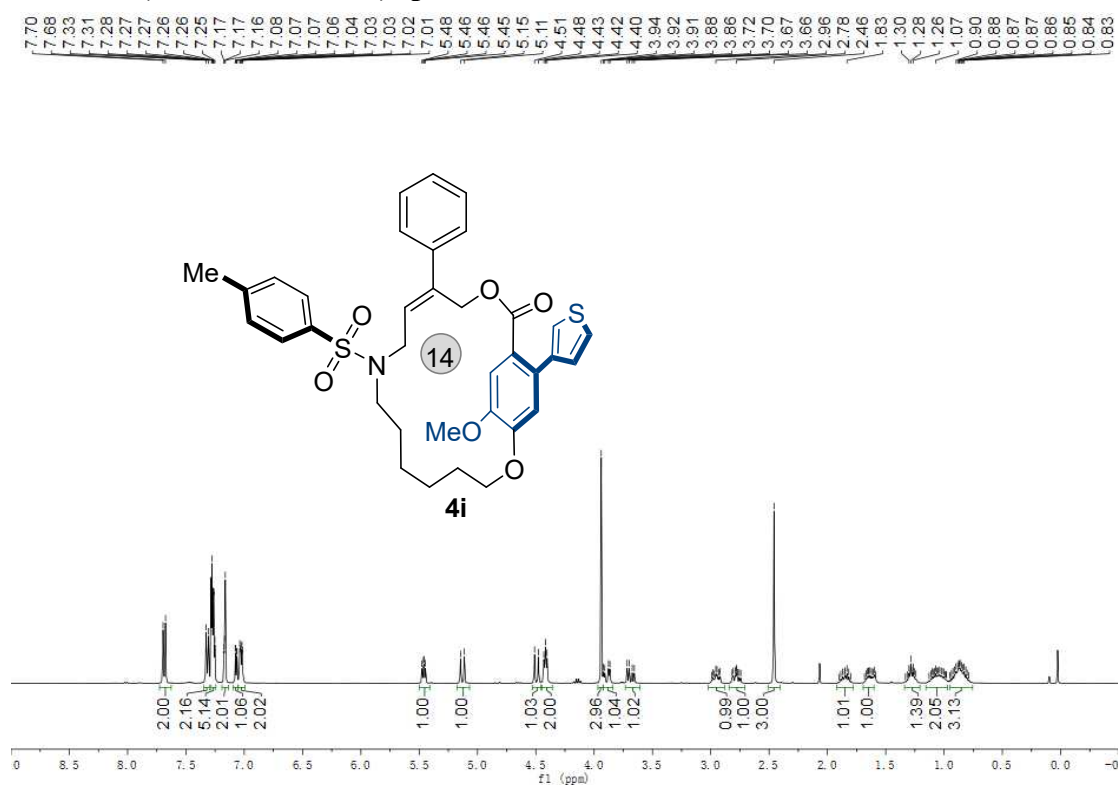

### <sup>13</sup>C NMR (100 MHz, CDCl<sub>3</sub>) spectra of 4i

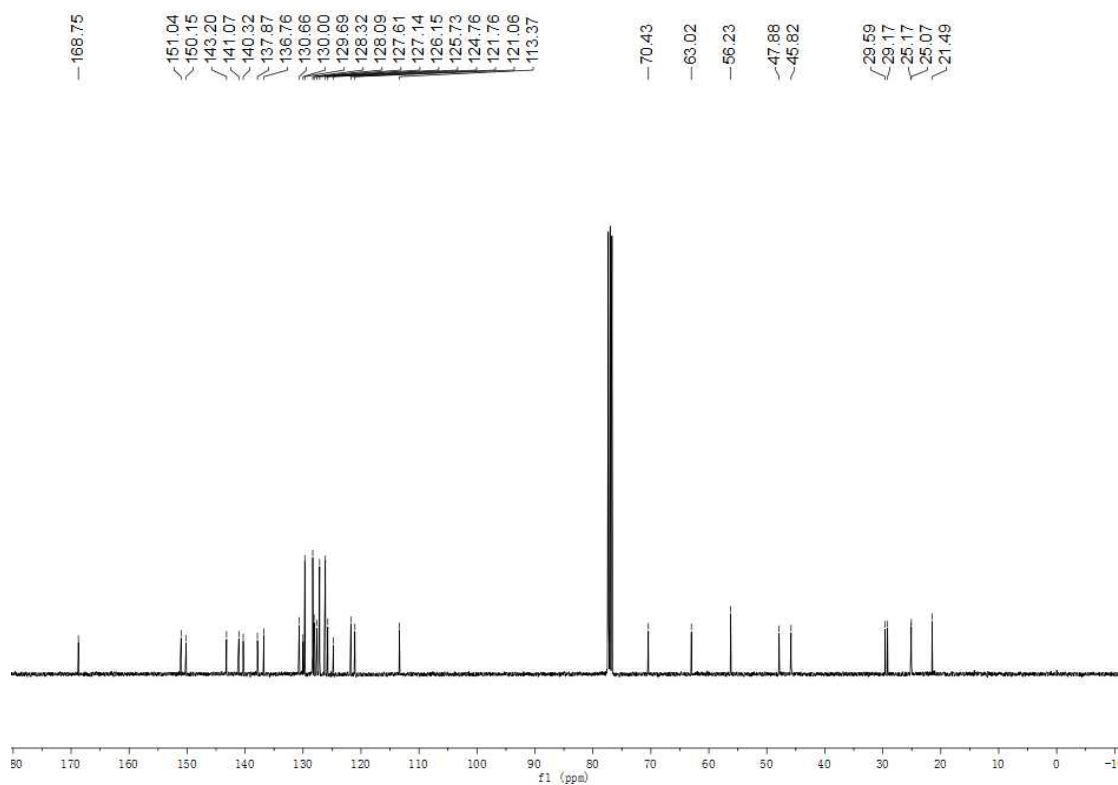

### <sup>1</sup>H NMR (400 MHz, CDCl<sub>3</sub>) spectra of 4j

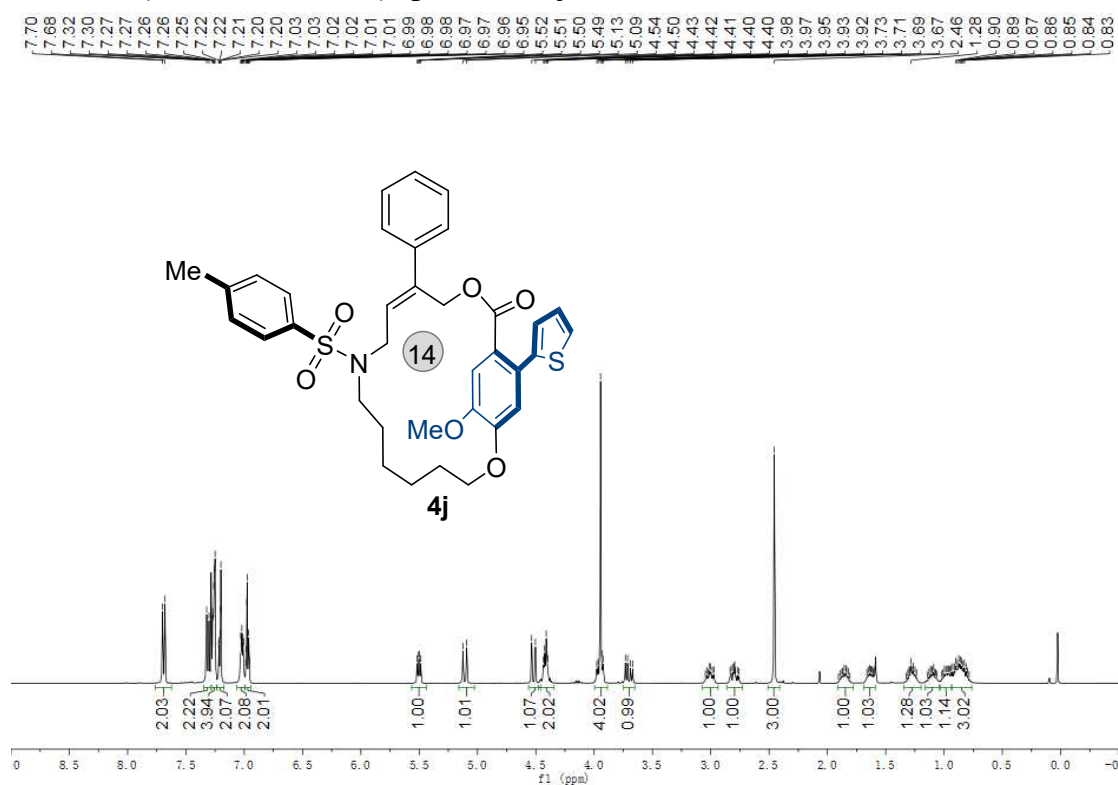

### <sup>13</sup>C NMR (100 MHz, CDCl<sub>3</sub>) spectra of 4j

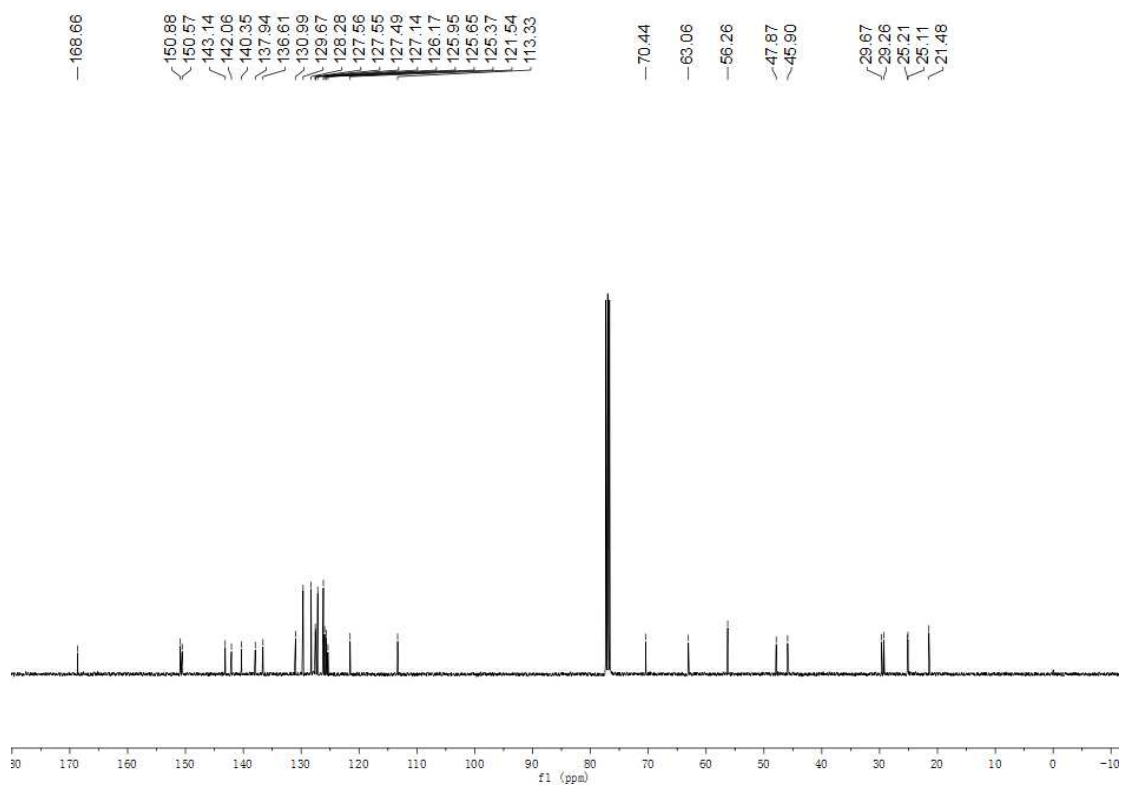



### $^1\text{H}$ NMR (400 MHz, $\text{CDCl}_3$ ) spectra of 4k

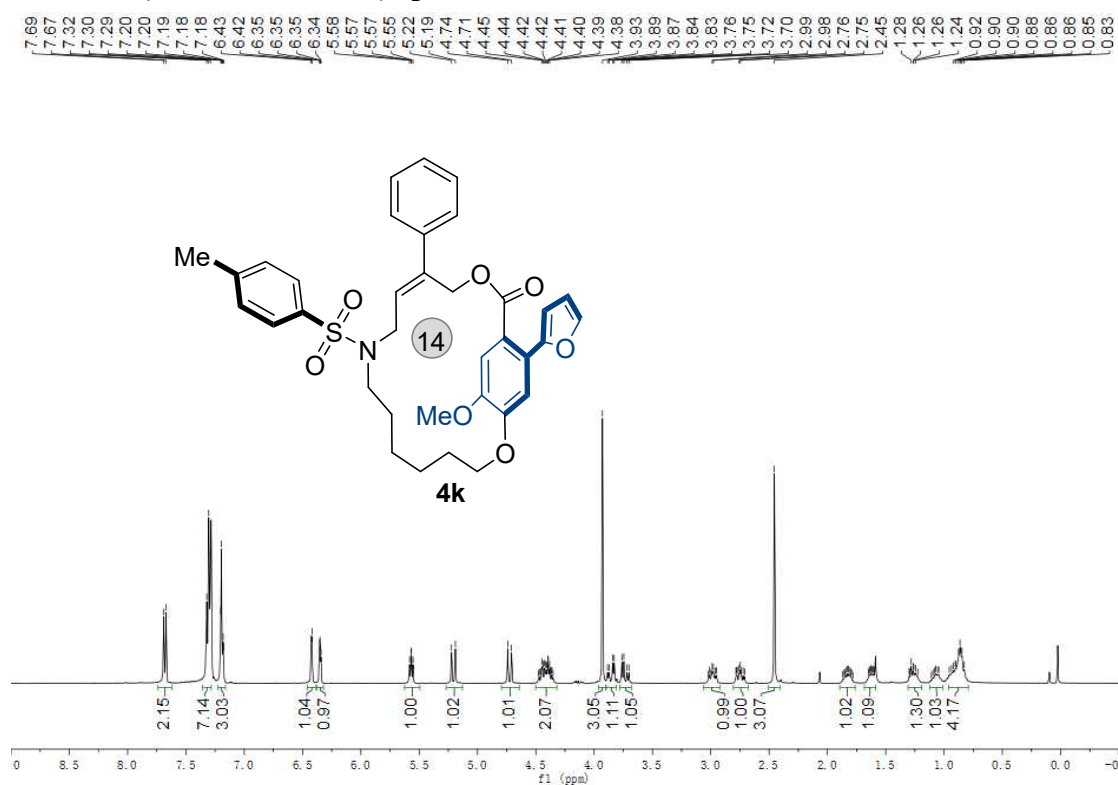

### $^{13}\text{C}$ NMR (100 MHz, $\text{CDCl}_3$ ) spectra of 4k

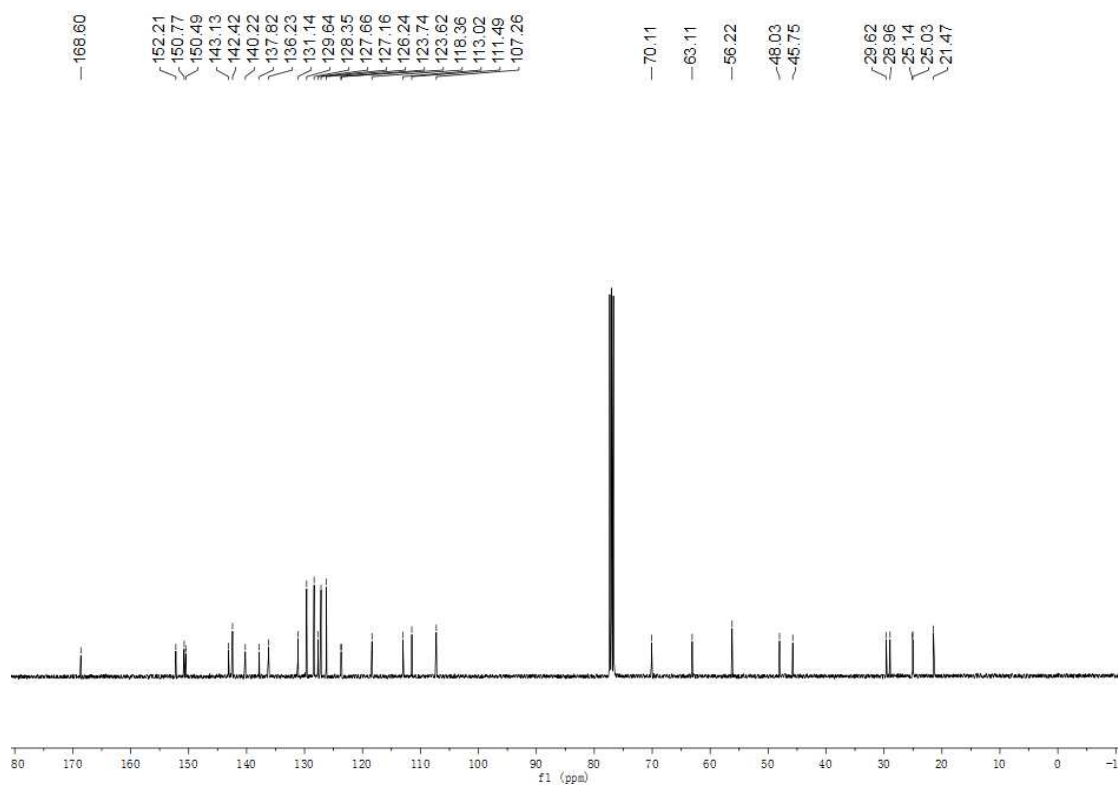

### <sup>1</sup>H NMR (400 MHz, CDCl<sub>3</sub>) spectra of 4I

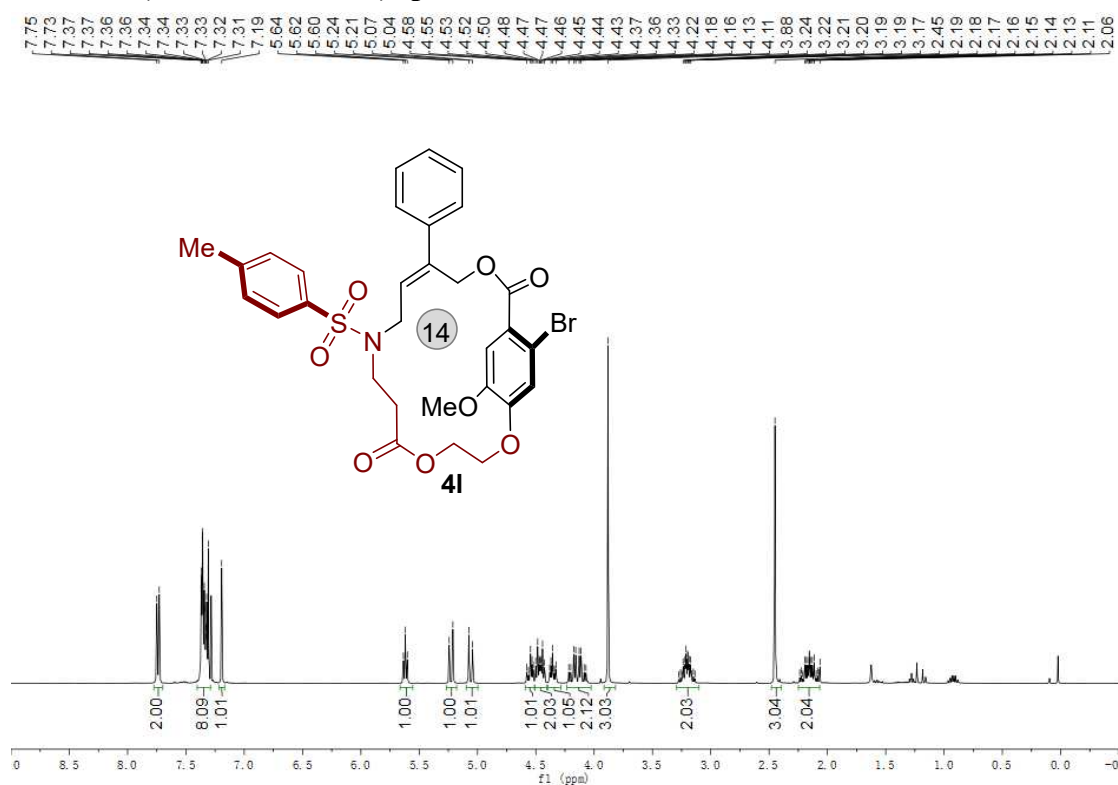

### <sup>13</sup>C NMR (100 MHz, CDCl<sub>3</sub>) spectra of 4I

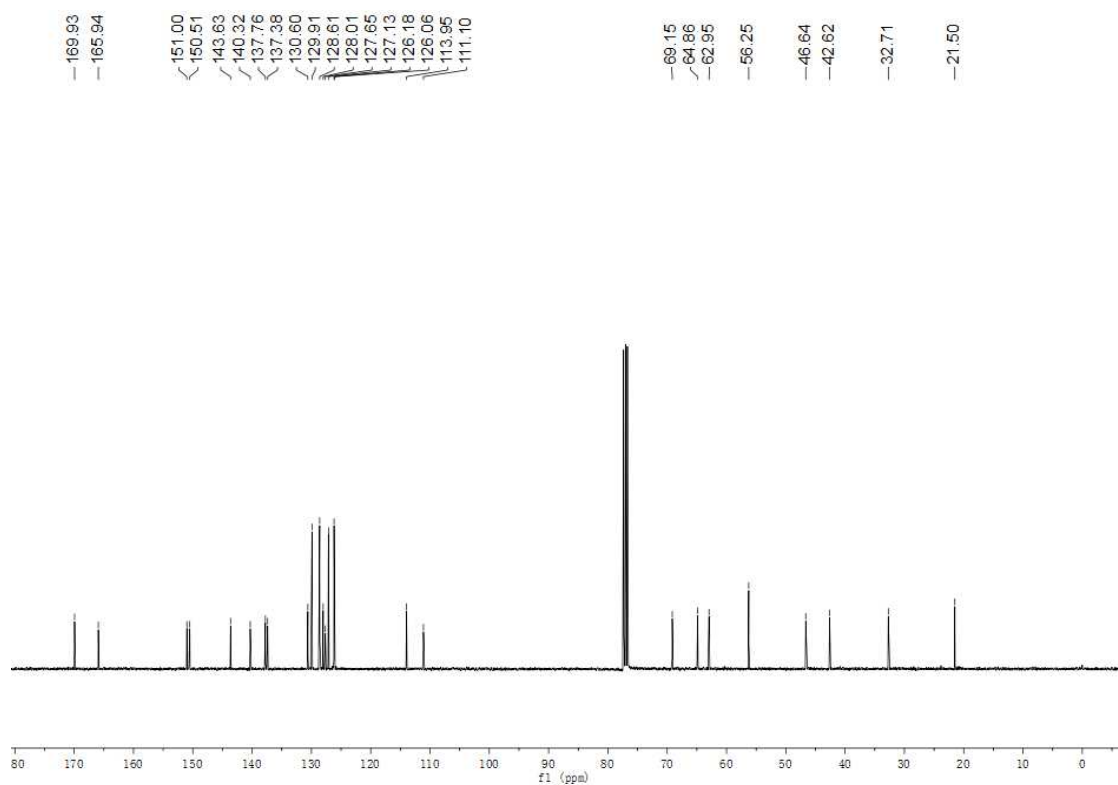

**<sup>1</sup>H NMR (400 MHz, CDCl<sub>3</sub>) spectra of 4m**

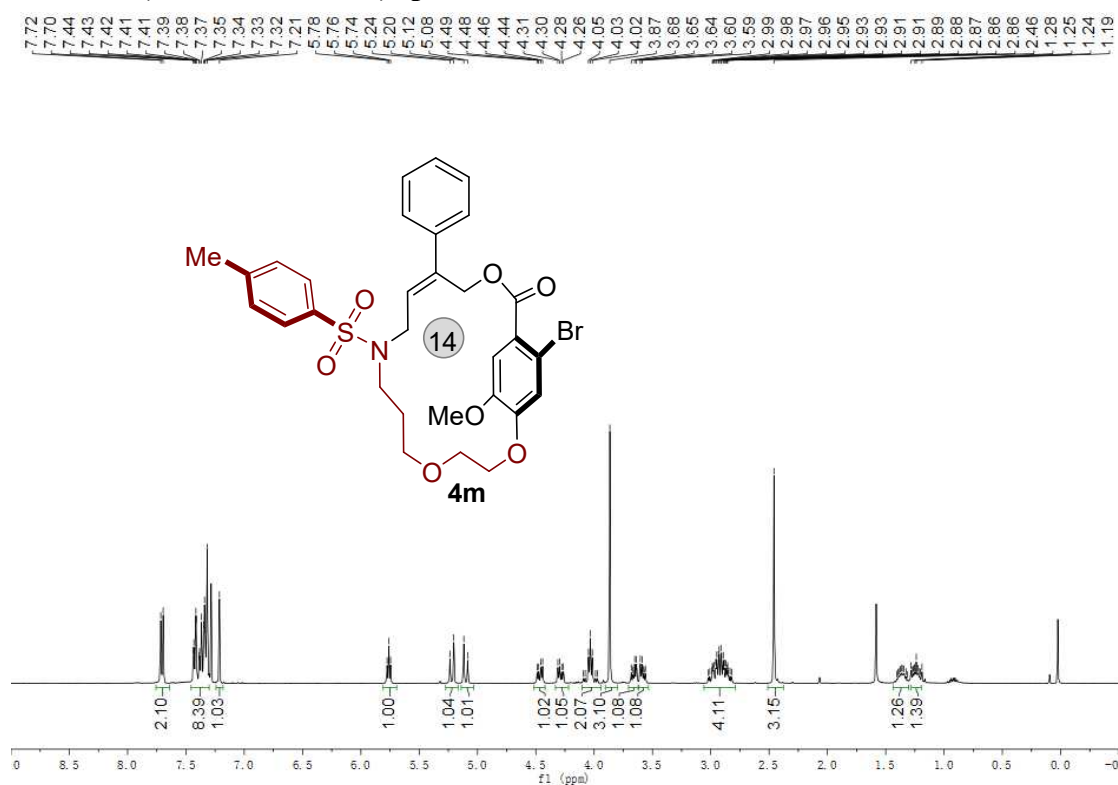

**<sup>13</sup>C NMR (100 MHz, CDCl<sub>3</sub>) spectra of 4m**

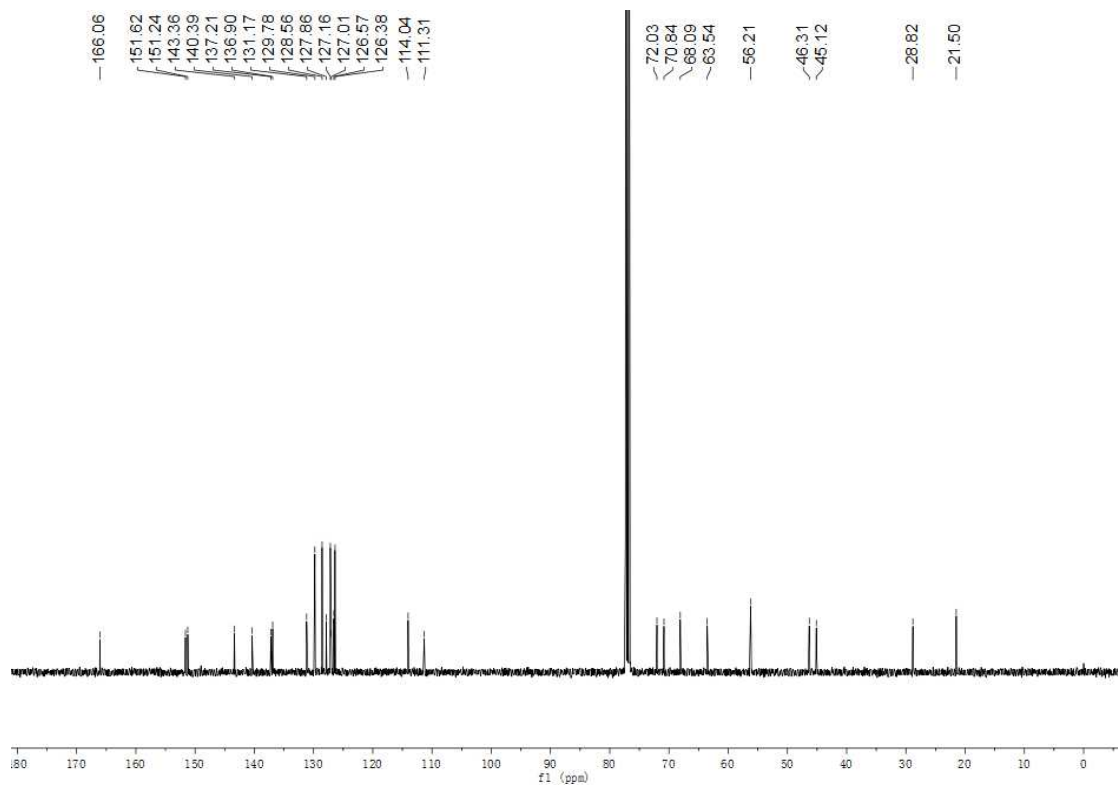

### <sup>1</sup>H NMR (400 MHz, CDCl<sub>3</sub>) spectra of 4n

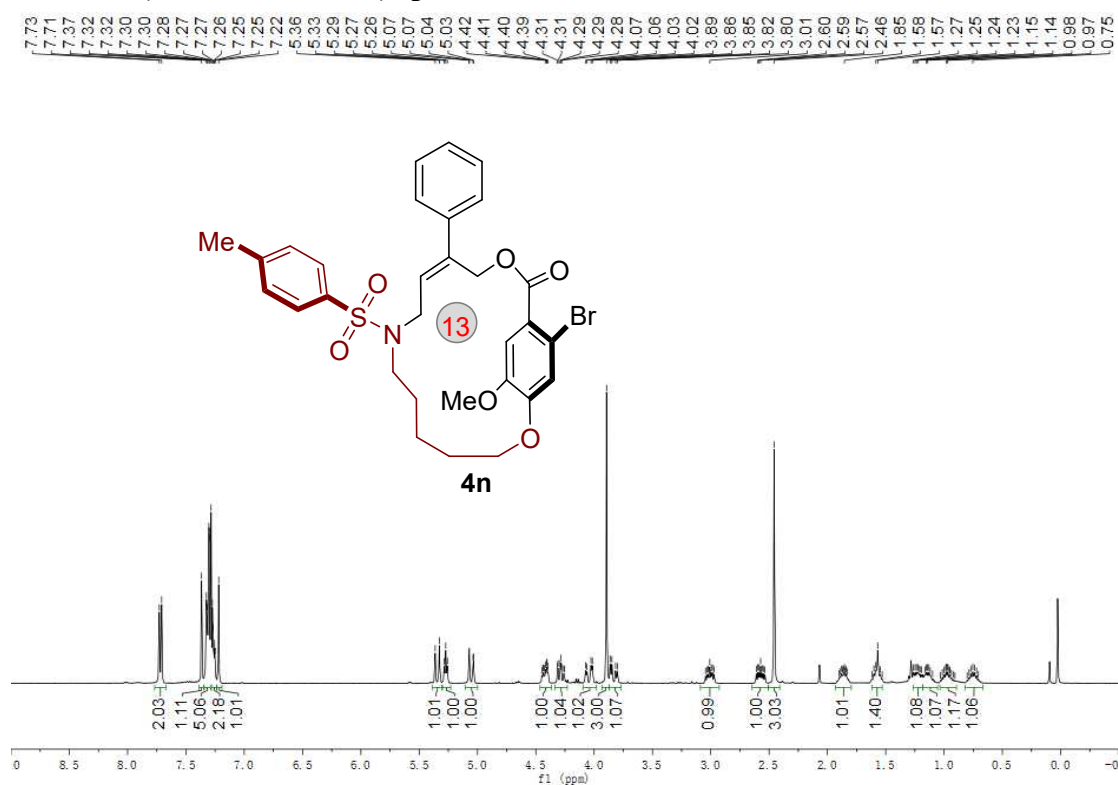

### <sup>13</sup>C NMR (100 MHz, CDCl<sub>3</sub>) spectra of 4n

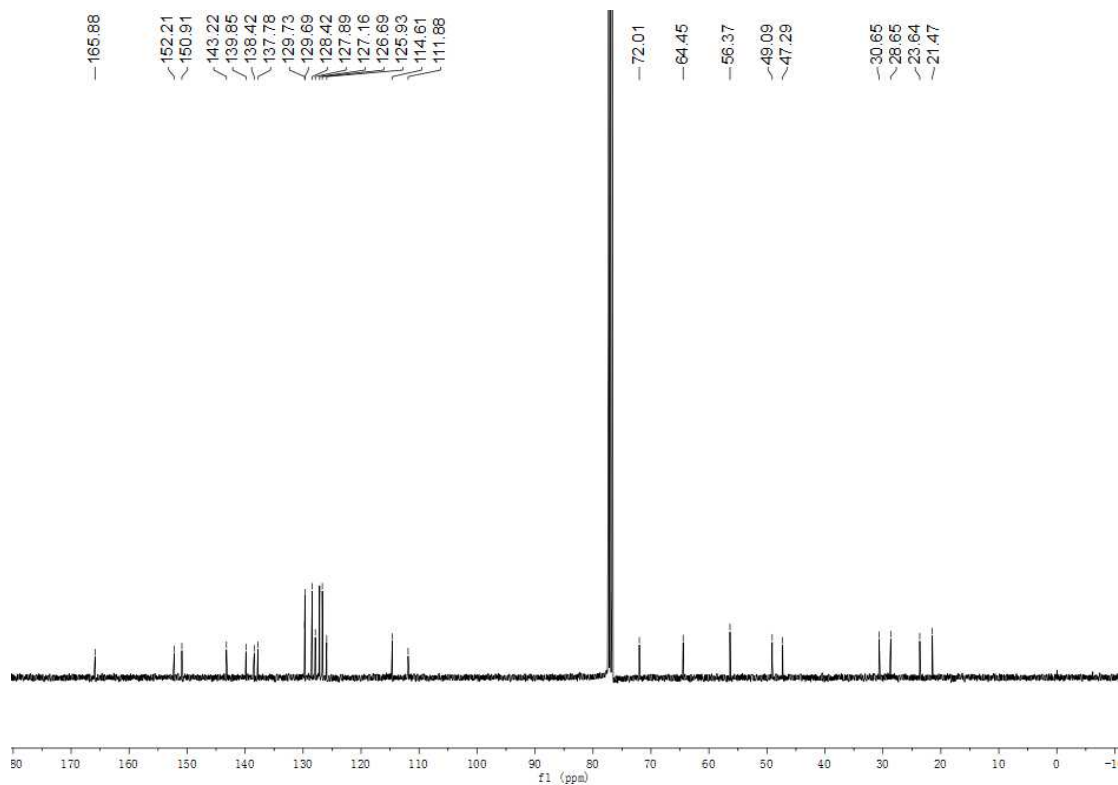

### <sup>1</sup>H NMR (400 MHz, CDCl<sub>3</sub>) spectra of 4o

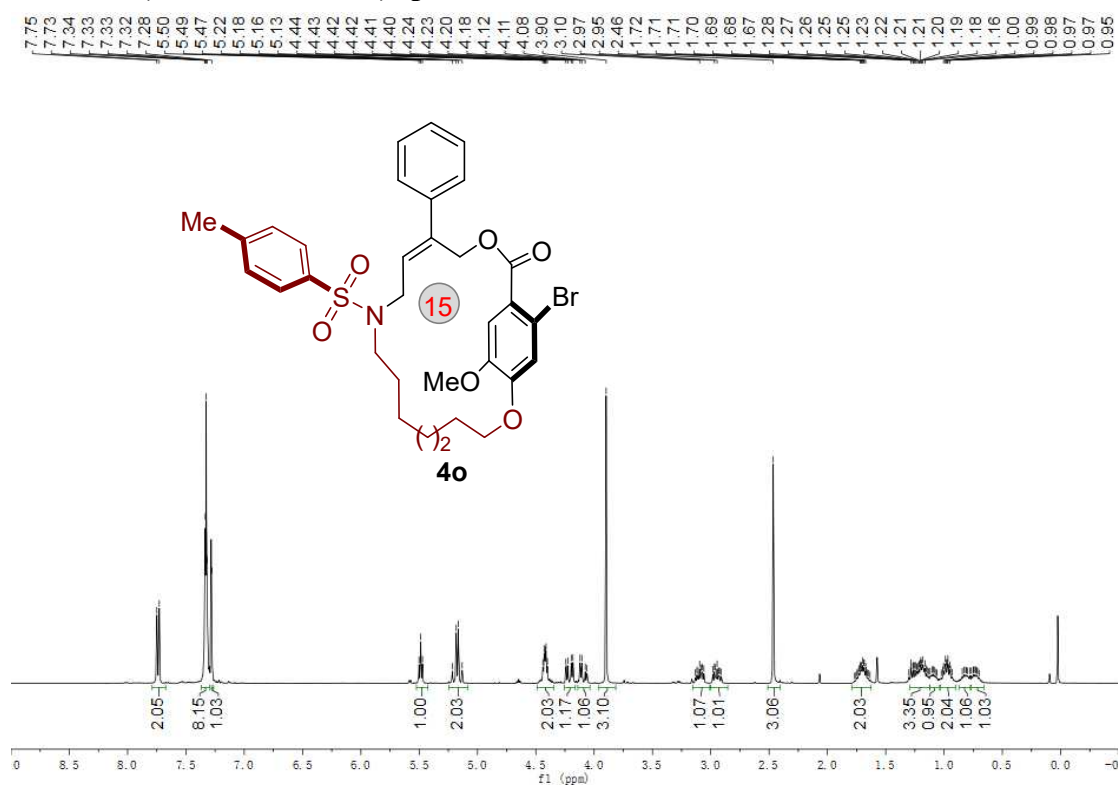

### <sup>13</sup>C NMR (100 MHz, CDCl<sub>3</sub>) spectra of 4o

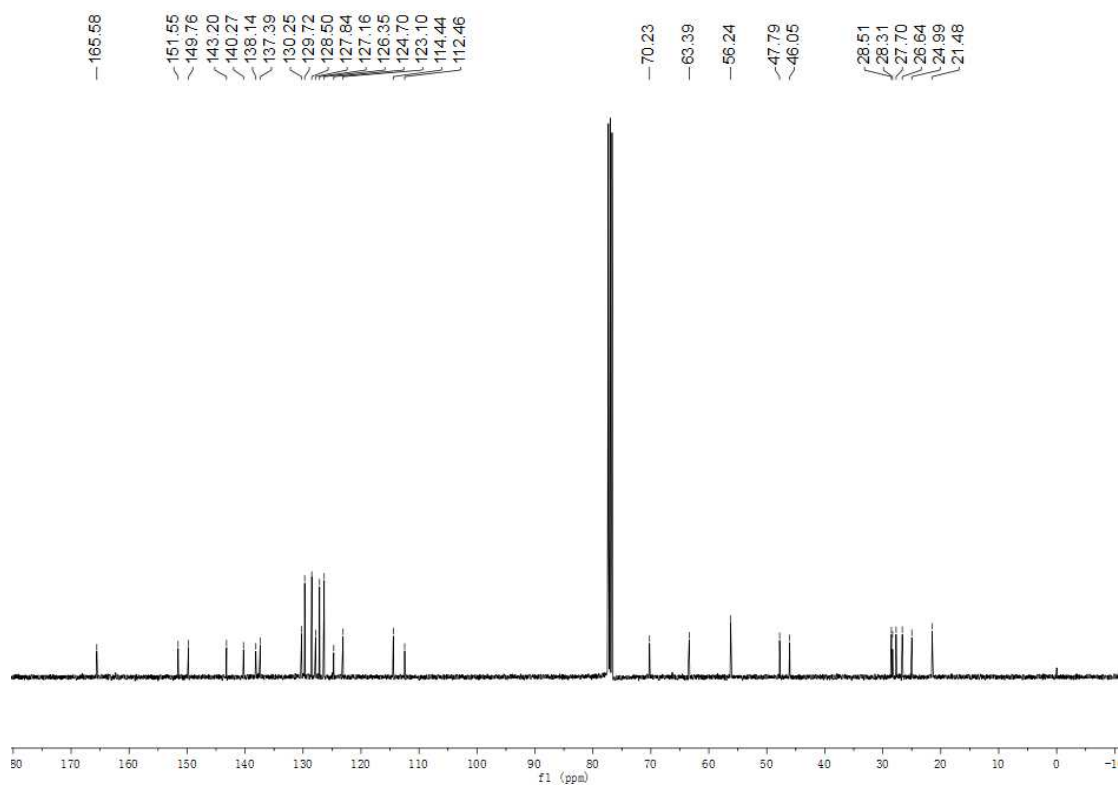

### <sup>1</sup>H NMR (400 MHz, CDCl<sub>3</sub>) spectra of 4p

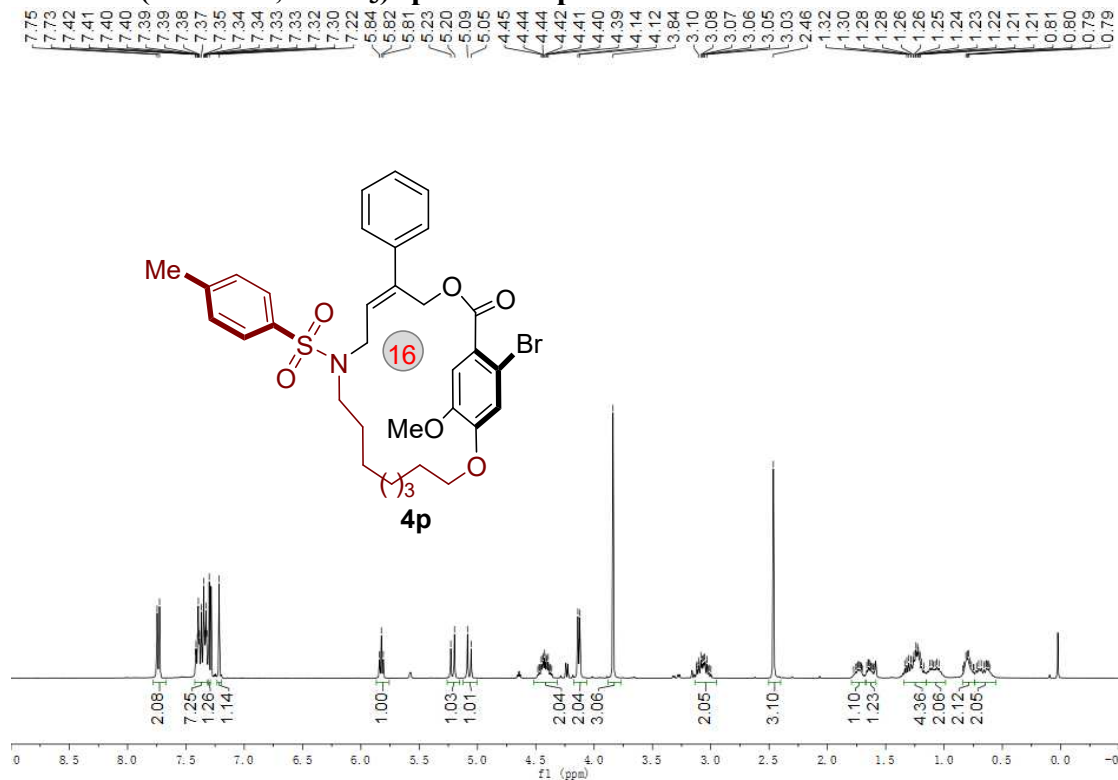

### <sup>13</sup>C NMR (100 MHz, CDCl<sub>3</sub>) spectra of 4p

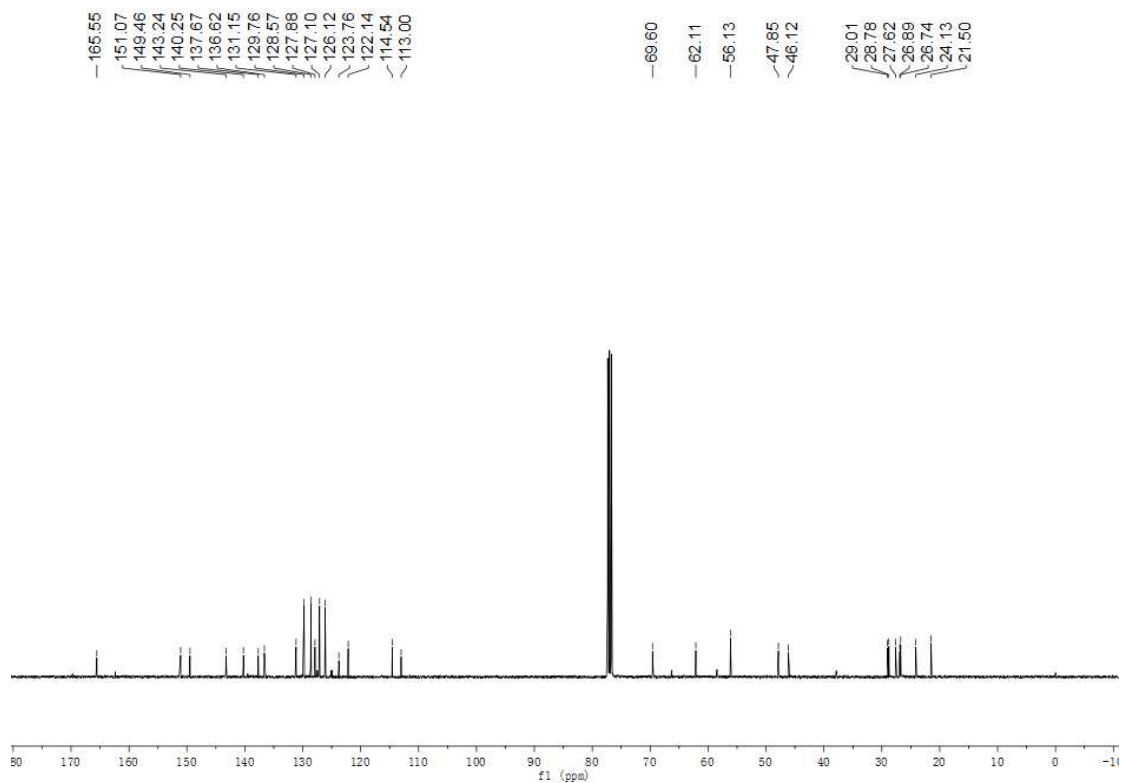

**<sup>1</sup>H NMR (400 MHz, CDCl<sub>3</sub>) spectra of 5**

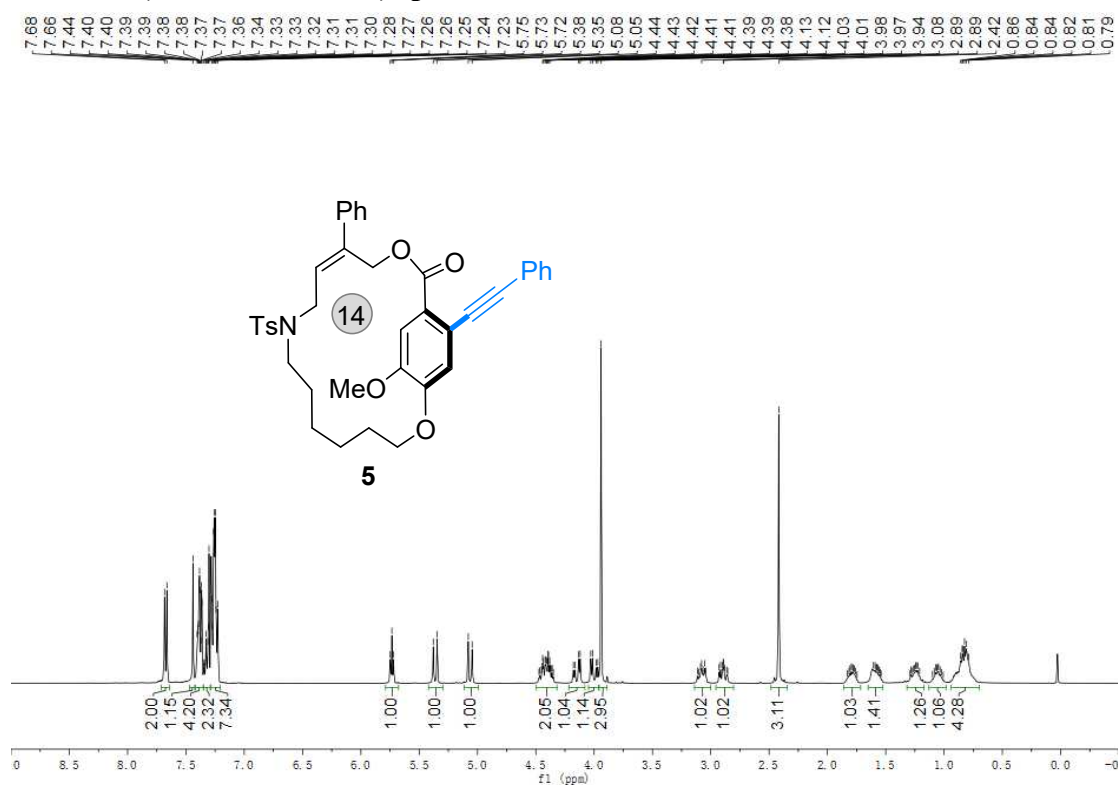

**<sup>13</sup>C NMR (100 MHz, CDCl<sub>3</sub>) spectra of 5**

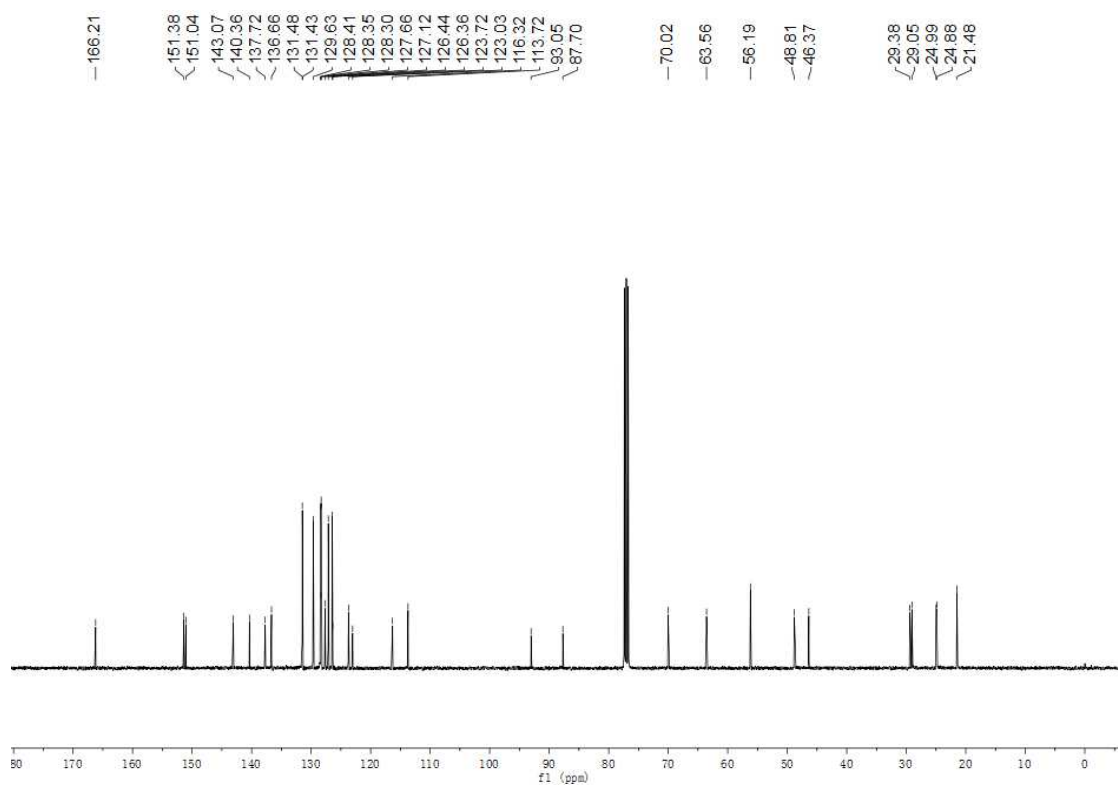

**<sup>1</sup>H NMR (400 MHz, CDCl<sub>3</sub>) spectra of 6**

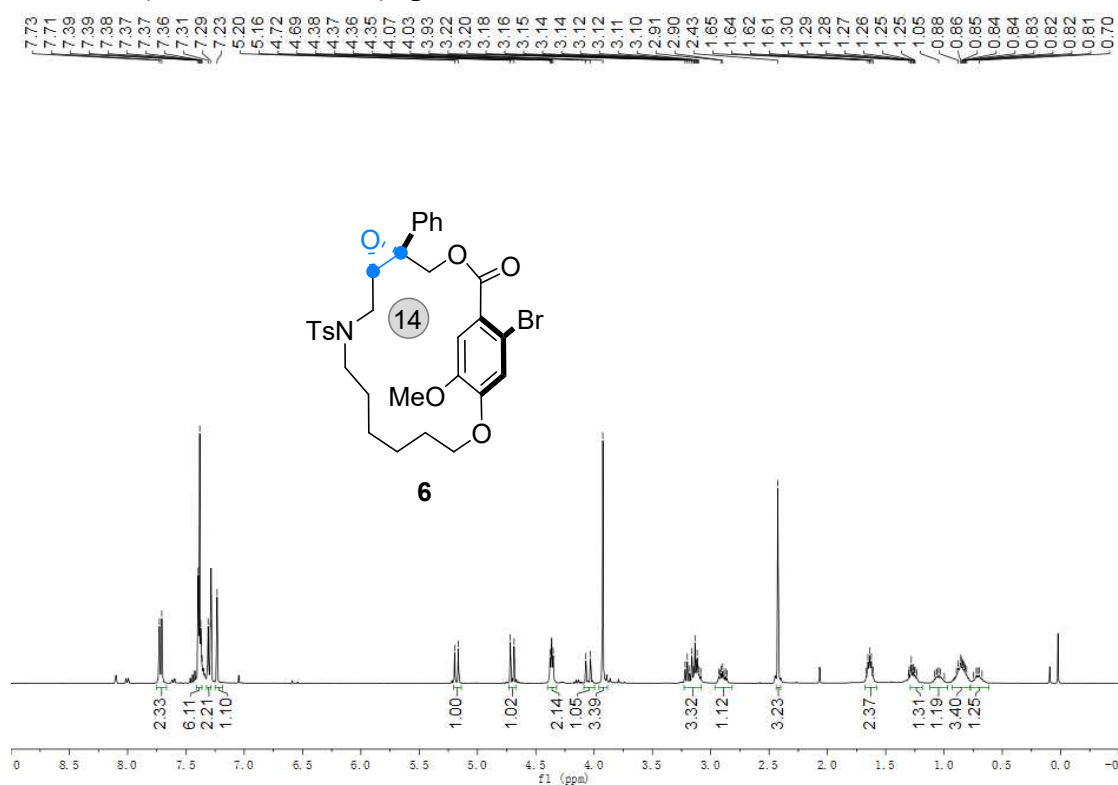

**<sup>13</sup>C NMR (100 MHz, CDCl<sub>3</sub>) spectra of 6**

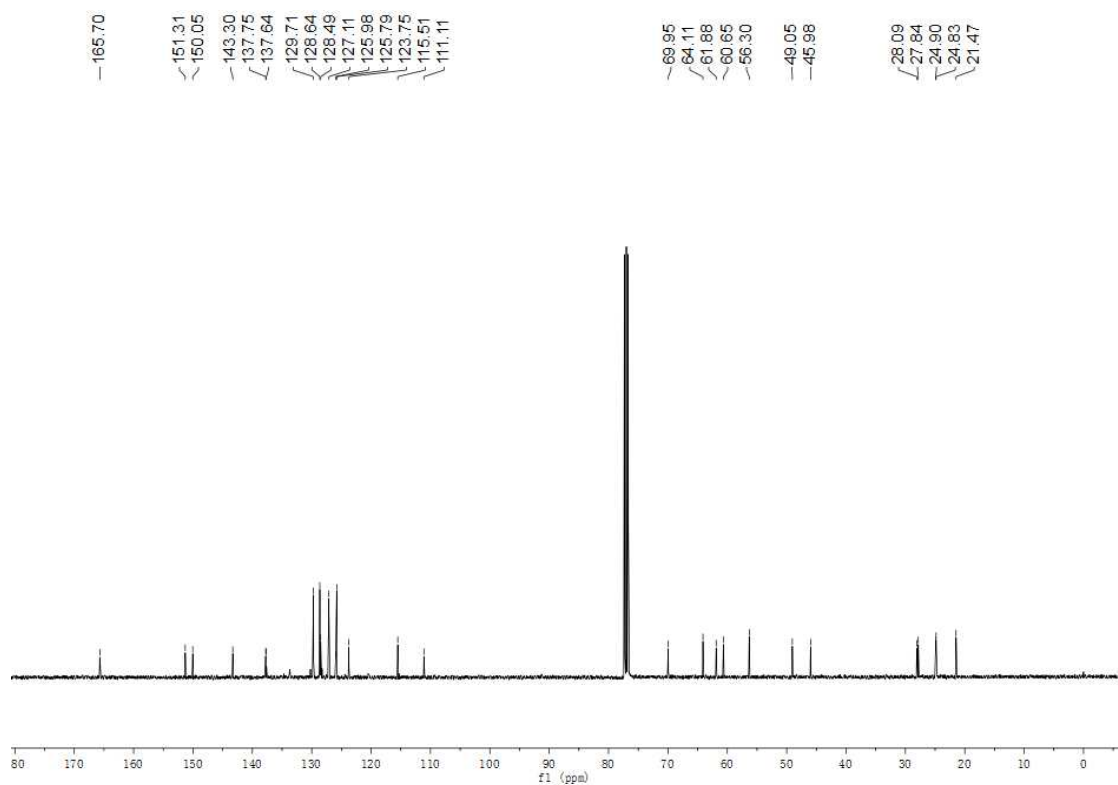



### <sup>1</sup>H NMR (400 MHz, CDCl<sub>3</sub>) spectra of 3a'

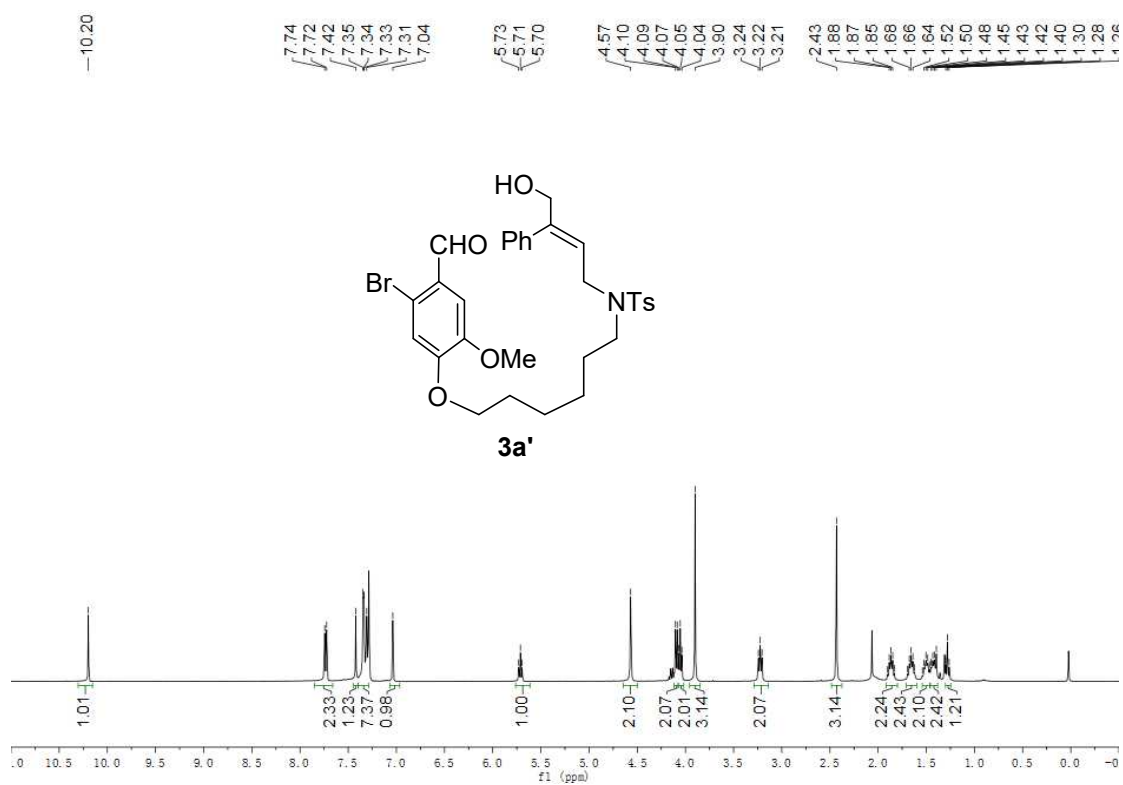

### <sup>13</sup>C NMR (100 MHz, CDCl<sub>3</sub>) spectra of 3a'

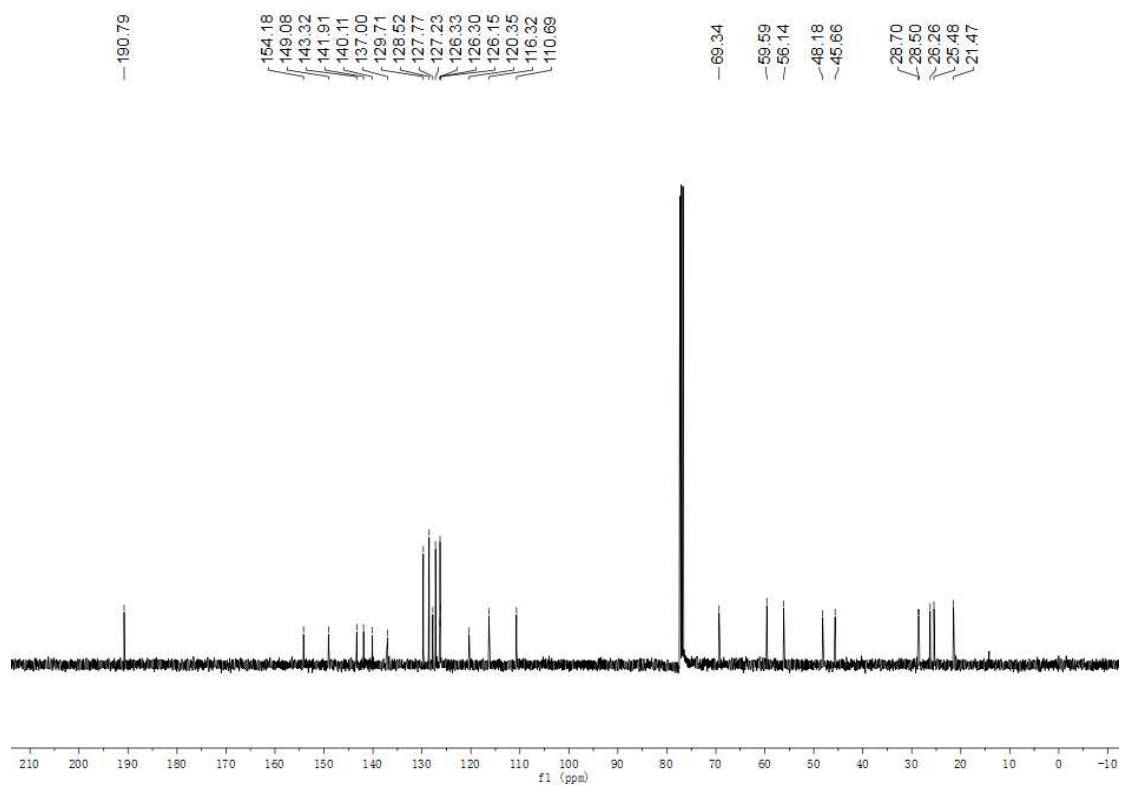

## HPLC Spectra

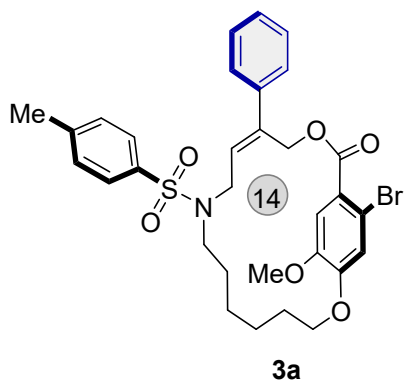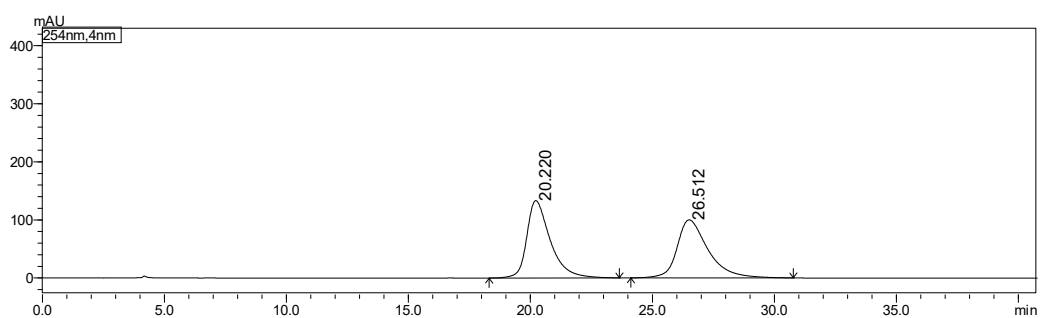

| Peak  | Ret. time | Area     | Height | Area%   | Height% |
|-------|-----------|----------|--------|---------|---------|
| 1     | 20.220    | 8949225  | 133289 | 50.257  | 57.142  |
| 2     | 26.512    | 8857723  | 99972  | 49.743  | 42.858  |
| Total |           | 17806948 | 233261 | 100.000 | 100.000 |

**HPLC Spectrum of racemic 3a.**

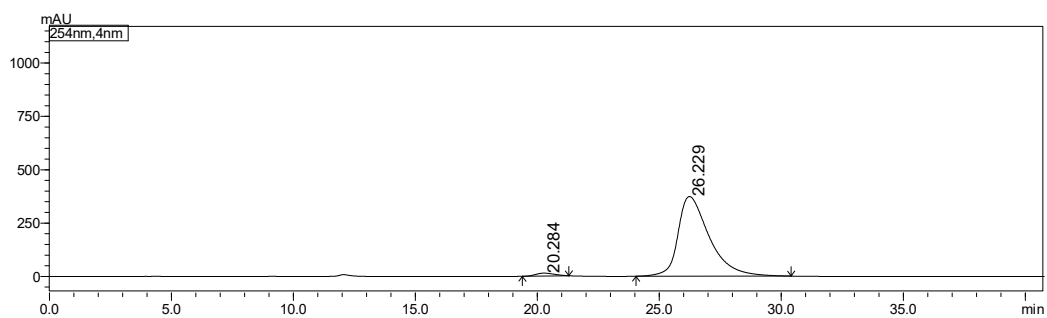

| Peak  | Ret. time | Area     | Height | Area%   | Height% |
|-------|-----------|----------|--------|---------|---------|
| 1     | 20.284    | 732864   | 13664  | 2.146   | 3.531   |
| 2     | 26.229    | 33416664 | 373351 | 97.854  | 96.469  |
| Total |           | 34149528 | 387014 | 100.000 | 100.000 |

**HPLC Spectrum of enantioenriched 3a.**

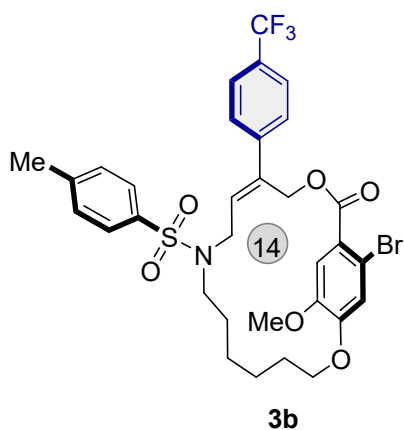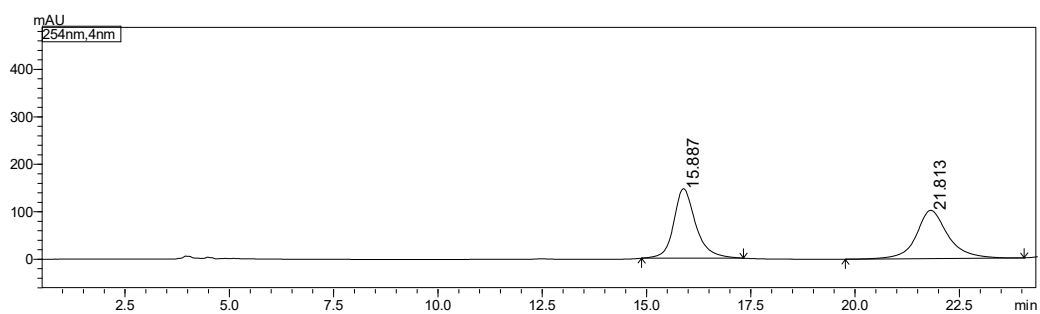

| Peak  | Ret. time | Area     | Height | Area%   | Height% |
|-------|-----------|----------|--------|---------|---------|
| 1     | 15.887    | 5399469  | 146268 | 50.120  | 59.009  |
| 2     | 21.813    | 5373681  | 101604 | 49.880  | 40.991  |
| Total |           | 10773150 | 247872 | 100.000 | 100.000 |

**HPLC Spectrum of racemic 3b.**

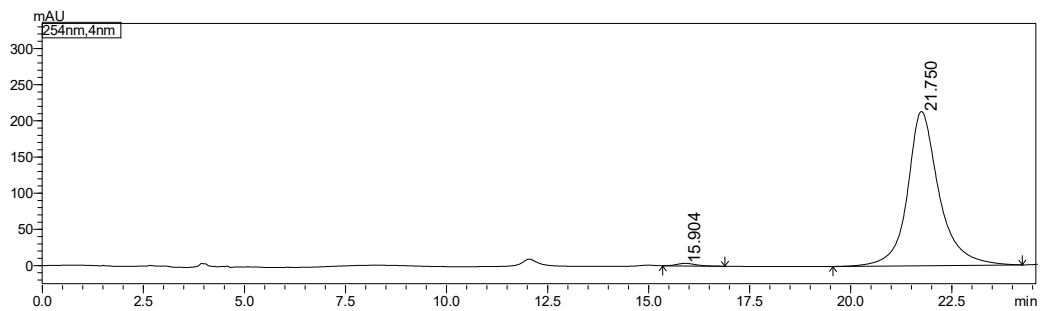

| Peak  | Ret. time | Area     | Height | Area%   | Height% |
|-------|-----------|----------|--------|---------|---------|
| 1     | 15.904    | 117525   | 3596   | 1.001   | 1.659   |
| 2     | 21.750    | 11623985 | 213182 | 98.999  | 98.341  |
| Total |           | 11741510 | 216778 | 100.000 | 100.000 |

**HPLC Spectrum of enantioenriched 3b.**

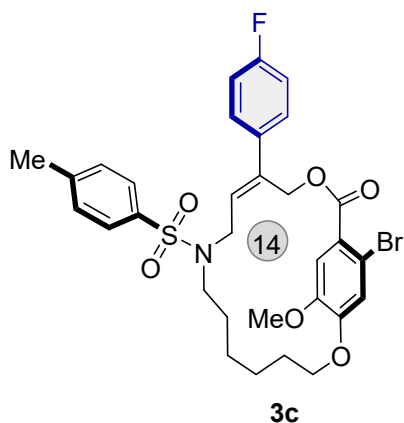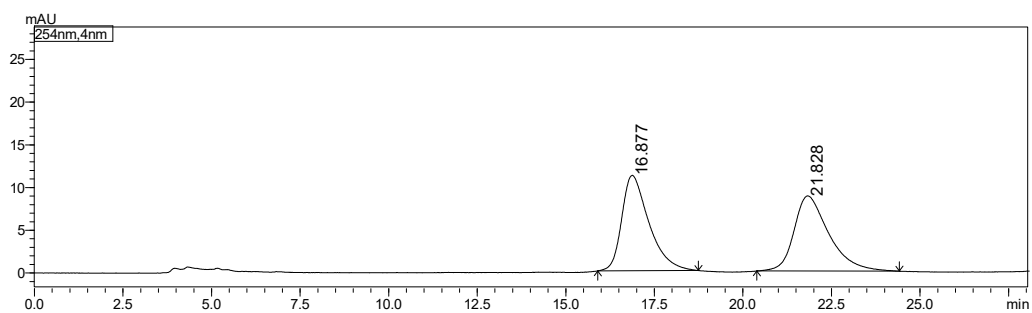

| Peak  | Ret. time | Area    | Height | Area%   | Height% |
|-------|-----------|---------|--------|---------|---------|
| 1     | 16.877    | 596505  | 11173  | 49.780  | 55.949  |
| 2     | 21.828    | 601789  | 8797   | 50.220  | 44.051  |
| Total |           | 1198293 | 19970  | 100.000 | 100.000 |

**HPLC Spectrum of racemic 3c.**

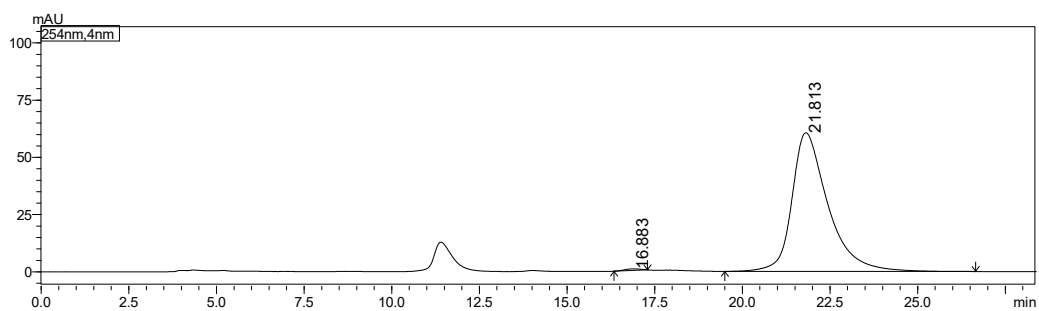

| Peak  | Ret. time | Area    | Height | Area%   | Height% |
|-------|-----------|---------|--------|---------|---------|
| 1     | 16.883    | 22087   | 700    | 0.507   | 1.142   |
| 2     | 21.813    | 4337467 | 60594  | 99.493  | 98.858  |
| Total |           | 4359554 | 61294  | 100.000 | 100.000 |

**HPLC Spectrum of enantioenriched 3c.**

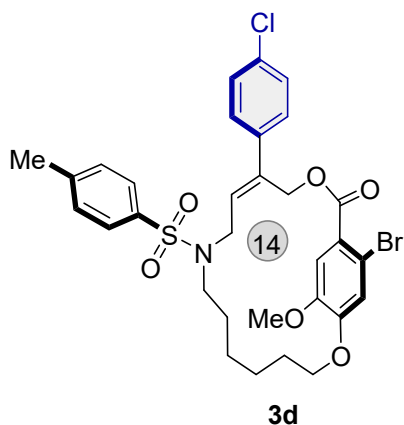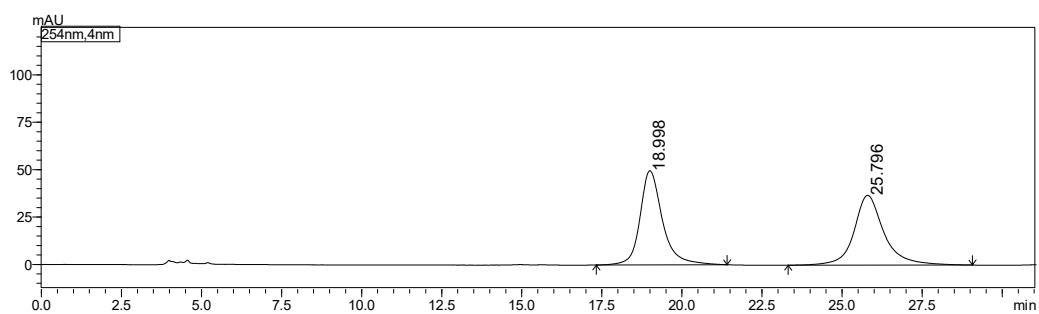

| Peak  | Ret. time | Area    | Height | Area%   | Height% |
|-------|-----------|---------|--------|---------|---------|
| 1     | 18.998    | 2424528 | 49675  | 50.134  | 57.404  |
| 2     | 25.796    | 2411532 | 36861  | 49.866  | 42.596  |
| Total |           | 4836060 | 86537  | 100.000 | 100.000 |

**HPLC Spectrum of racemic 3d.**

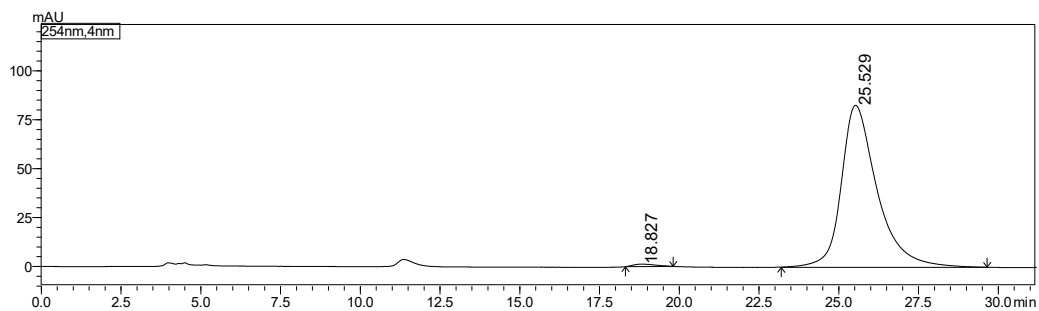

| Peak  | Ret. time | Area    | Height | Area%   | Height% |
|-------|-----------|---------|--------|---------|---------|
| 1     | 18.827    | 59199   | 1242   | 0.903   | 1.478   |
| 2     | 25.529    | 6498239 | 82807  | 99.097  | 98.522  |
| Total |           | 6557438 | 84050  | 100.000 | 100.000 |

**HPLC Spectrum of enantioenriched 3d.**

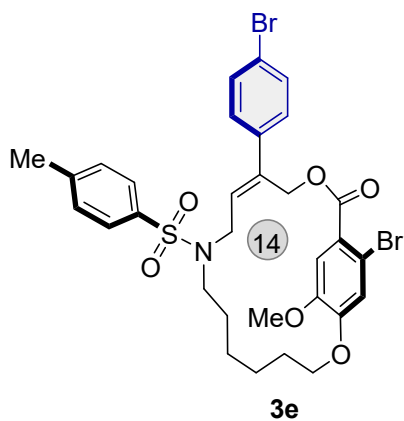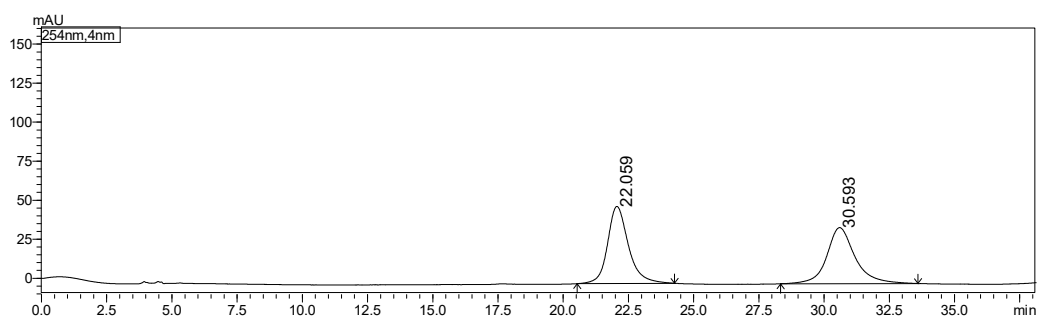

| Peak  | Ret. time | Area    | Height | Area%   | Height% |
|-------|-----------|---------|--------|---------|---------|
| 1     | 22.059    | 2755230 | 49385  | 50.351  | 57.882  |
| 2     | 30.593    | 2716819 | 35935  | 49.649  | 42.118  |
| Total |           | 5472049 | 85319  | 100.000 | 100.000 |

**HPLC Spectrum of racemic 3e.**

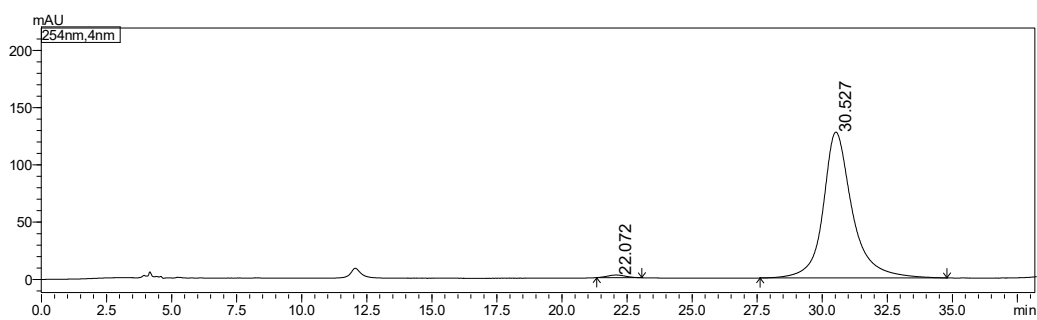

| Peak  | Ret. time | Area     | Height | Area%   | Height% |
|-------|-----------|----------|--------|---------|---------|
| 1     | 22.072    | 112150   | 2317   | 1.114   | 1.785   |
| 2     | 30.527    | 9952176  | 127461 | 98.886  | 98.215  |
| Total |           | 10064326 | 129778 | 100.000 | 100.000 |

**HPLC Spectrum of enantioenriched 3e.**

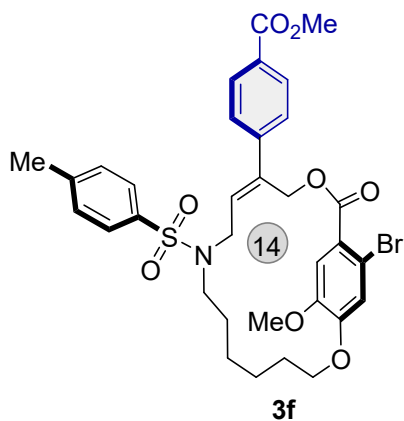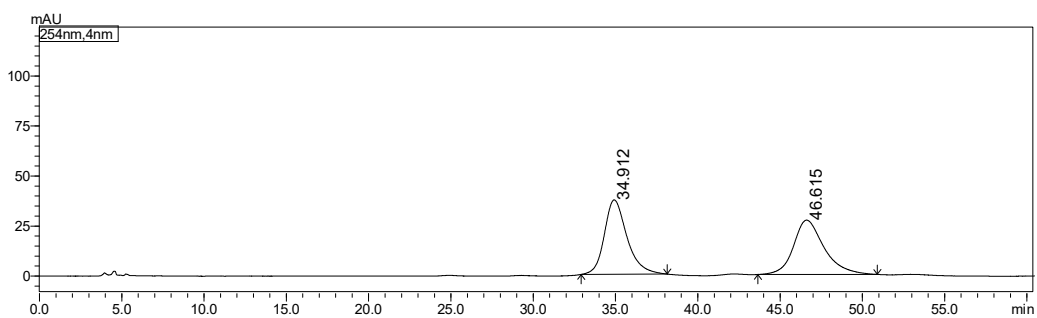

| Peak  | Ret. time | Area    | Height | Area%   | Height% |
|-------|-----------|---------|--------|---------|---------|
| 1     | 34.912    | 3570614 | 37218  | 50.295  | 57.776  |
| 2     | 46.615    | 3528744 | 27200  | 49.705  | 42.224  |
| Total |           | 7099358 | 64418  | 100.000 | 100.000 |

**HPLC Spectrum of racemic 3f.**

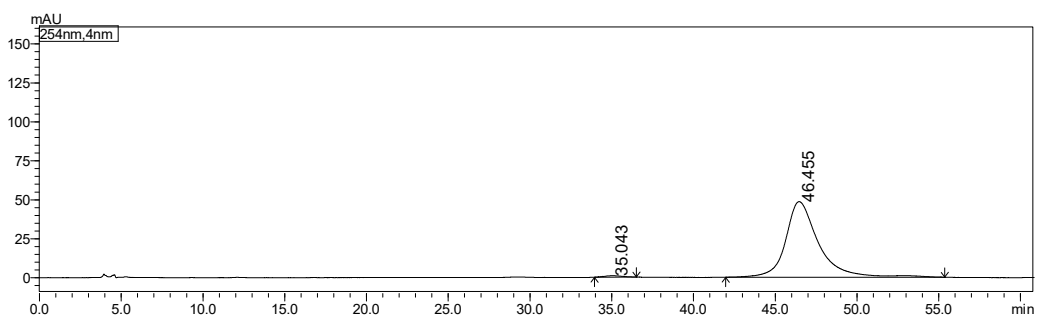

| Peak  | Ret. time | Area    | Height | Area%   | Height% |
|-------|-----------|---------|--------|---------|---------|
| 1     | 35.043    | 69895   | 959    | 1.016   | 1.938   |
| 2     | 46.455    | 6808898 | 48516  | 98.984  | 98.062  |
| Total |           | 6878793 | 49475  | 100.000 | 100.000 |

**HPLC Spectrum of enantioenriched 3f.**

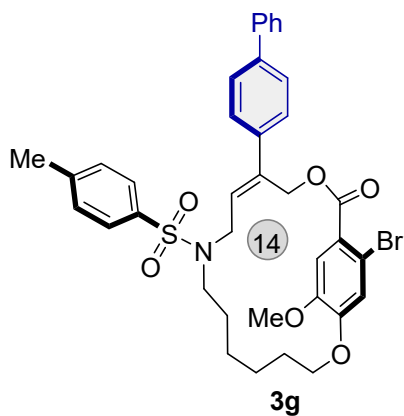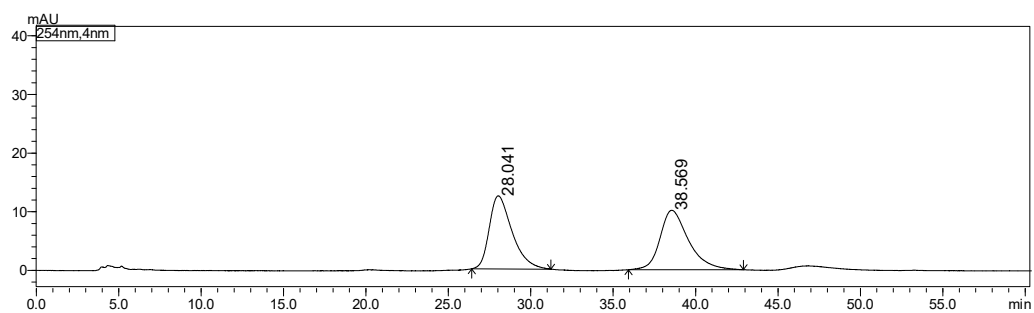

| Peak  | Ret. time | Area    | Height | Area%   | Height% |
|-------|-----------|---------|--------|---------|---------|
| 1     | 28.041    | 1204770 | 12476  | 49.743  | 55.164  |
| 2     | 38.569    | 1217225 | 10140  | 50.257  | 44.836  |
| Total |           | 2421995 | 22616  | 100.000 | 100.000 |

**HPLC Spectrum of racemic 3g.**

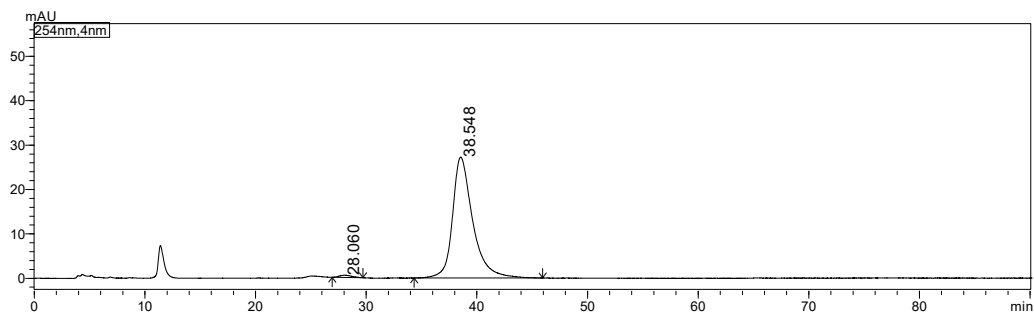

| Peak  | Ret. time | Area    | Height | Area%   | Height% |
|-------|-----------|---------|--------|---------|---------|
| 1     | 28.060    | 39747   | 510    | 1.136   | 1.838   |
| 2     | 38.548    | 3457612 | 27227  | 98.864  | 98.162  |
| Total |           | 3497358 | 27736  | 100.000 | 100.000 |

**HPLC Spectrum of enantioenriched 3g.**



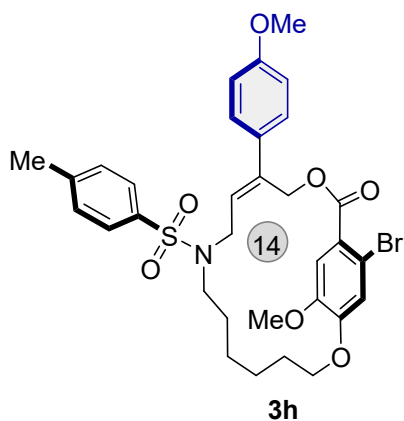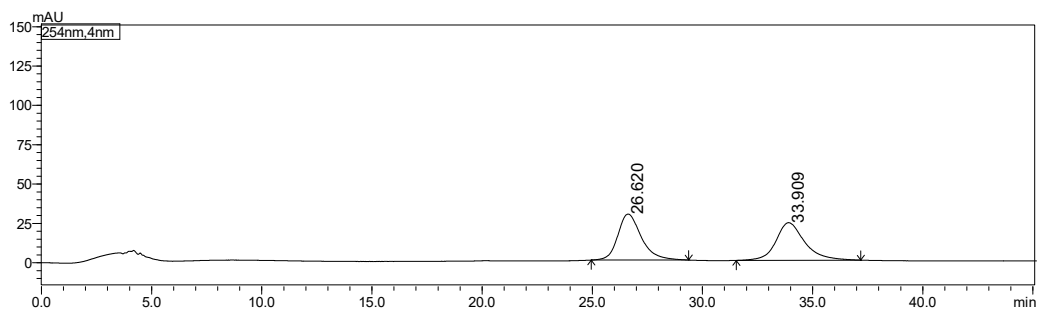

| Peak  | Ret. time | Area    | Height | Area%   | Height% |
|-------|-----------|---------|--------|---------|---------|
| 1     | 26.620    | 2174360 | 29245  | 49.894  | 54.990  |
| 2     | 33.909    | 2183604 | 23937  | 50.106  | 45.010  |
| Total |           | 4357964 | 53183  | 100.000 | 100.000 |

**HPLC Spectrum of racemic 3h.**

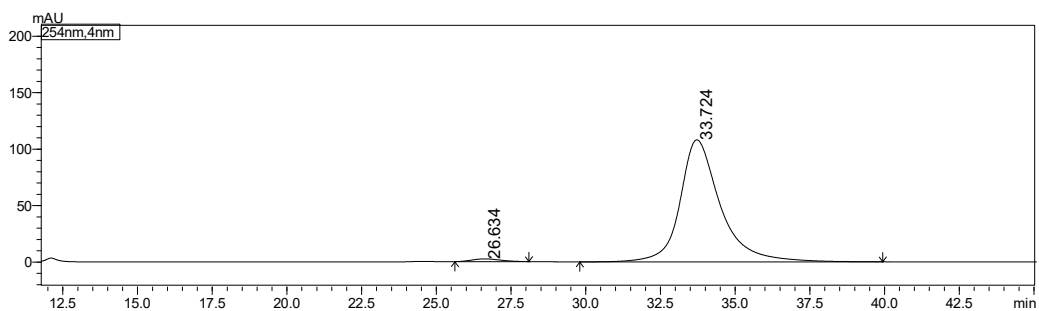

| Peak  | Ret. time | Area     | Height | Area%   | Height% |
|-------|-----------|----------|--------|---------|---------|
| 1     | 26.634    | 164651   | 2461   | 1.594   | 2.228   |
| 2     | 33.724    | 10164911 | 108027 | 98.406  | 97.772  |
| Total |           | 10329562 | 110489 | 100.000 | 100.000 |

**HPLC Spectrum of enantioenriched 3h.**

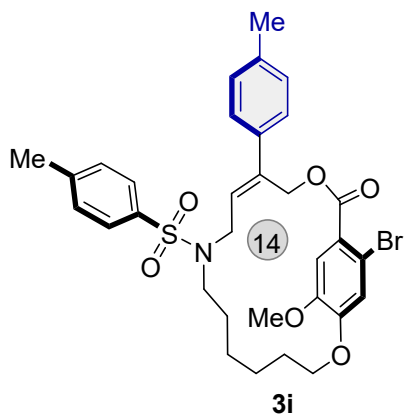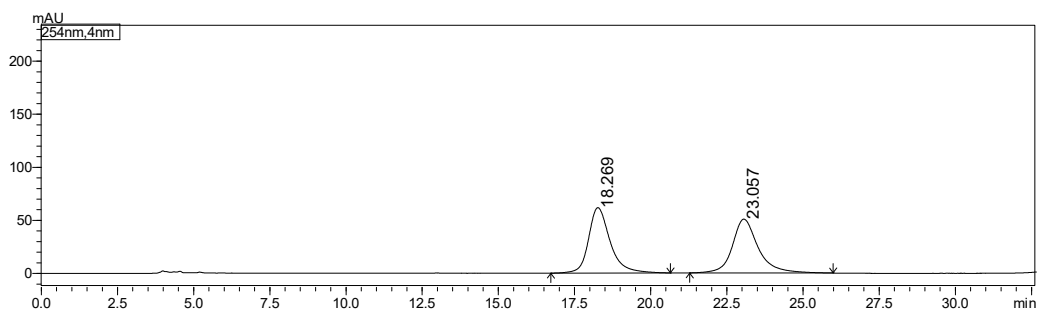

| Peak  | Ret. time | Area    | Height | Area%   | Height% |
|-------|-----------|---------|--------|---------|---------|
| 1     | 18.269    | 3045431 | 61647  | 50.207  | 54.835  |
| 2     | 23.057    | 3020273 | 50777  | 49.793  | 45.165  |
| Total |           | 6065704 | 112424 | 100.000 | 100.000 |

**HPLC Spectrum of racemic 3i.**

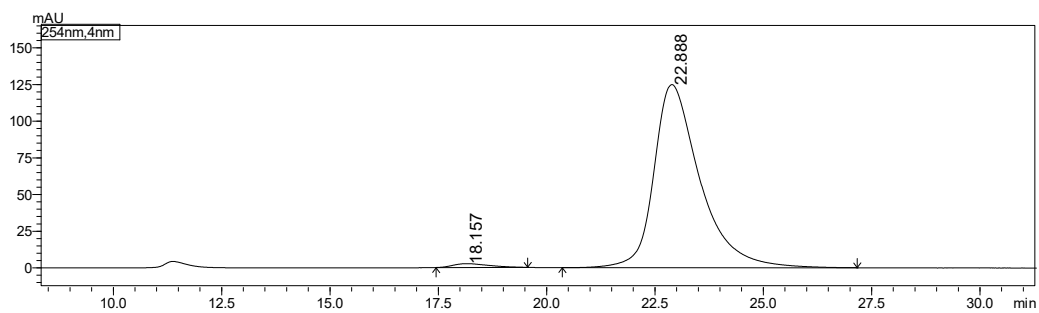

| Peak  | Ret. time | Area    | Height | Area%   | Height% |
|-------|-----------|---------|--------|---------|---------|
| 1     | 18.157    | 148458  | 2618   | 1.579   | 2.054   |
| 2     | 22.888    | 9256306 | 124855 | 98.421  | 97.946  |
| Total |           | 9404765 | 127473 | 100.000 | 100.000 |

**HPLC Spectrum of enantioenriched 3i.**

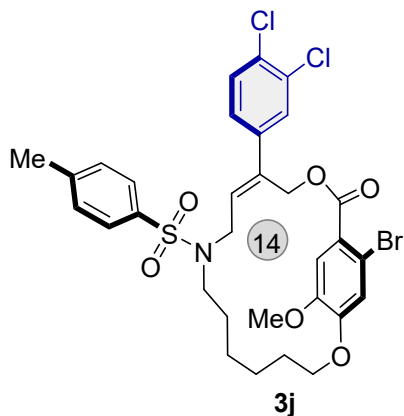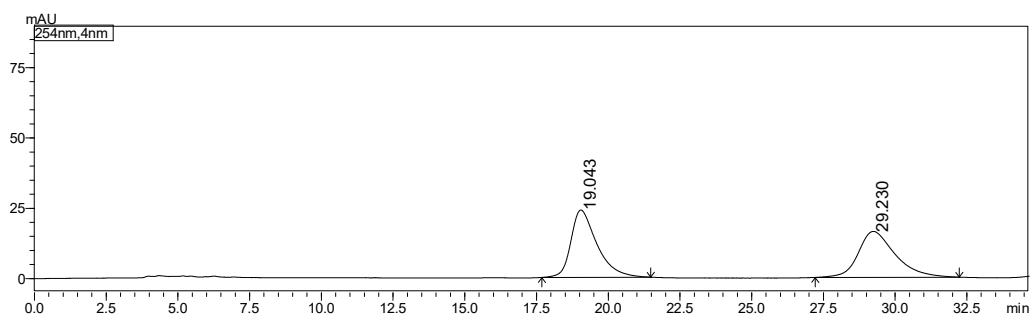

| Peak  | Ret. time | Area    | Height | Area%   | Height% |
|-------|-----------|---------|--------|---------|---------|
| 1     | 19.043    | 1510707 | 23942  | 50.808  | 59.473  |
| 2     | 29.230    | 1462652 | 16315  | 49.192  | 40.527  |
| Total |           | 2973360 | 40256  | 100.000 | 100.000 |

**HPLC Spectrum of racemic 3j.**

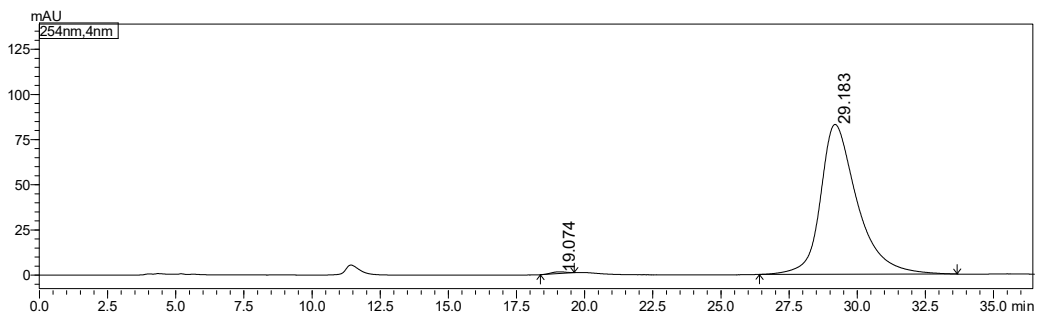

| Peak  | Ret. time | Area    | Height | Area%   | Height% |
|-------|-----------|---------|--------|---------|---------|
| 1     | 19.074    | 38147   | 995    | 0.487   | 1.185   |
| 2     | 29.183    | 7793299 | 82956  | 99.513  | 98.815  |
| Total |           | 7831446 | 83950  | 100.000 | 100.000 |

**HPLC Spectrum of enantioenriched 3j.**

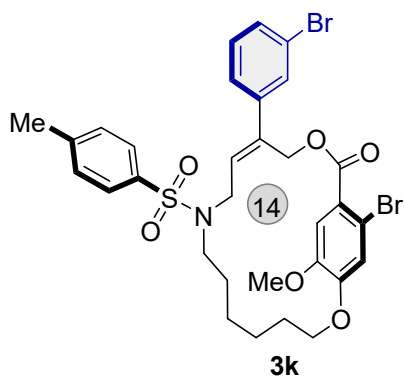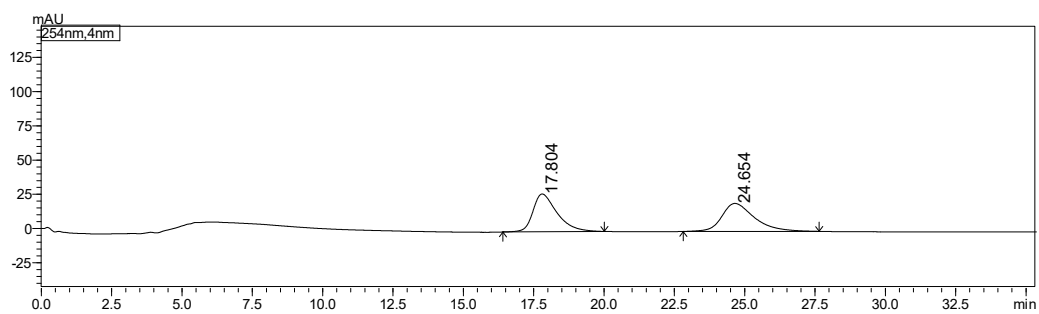

| Peak  | Ret. time | Area    | Height | Area%   | Height% |
|-------|-----------|---------|--------|---------|---------|
| 1     | 17.804    | 1648188 | 27621  | 49.819  | 57.436  |
| 2     | 24.654    | 1660189 | 20469  | 50.181  | 42.564  |
| Total |           | 3308376 | 48090  | 100.000 | 100.000 |

**HPLC Spectrum of racemic 3k.**

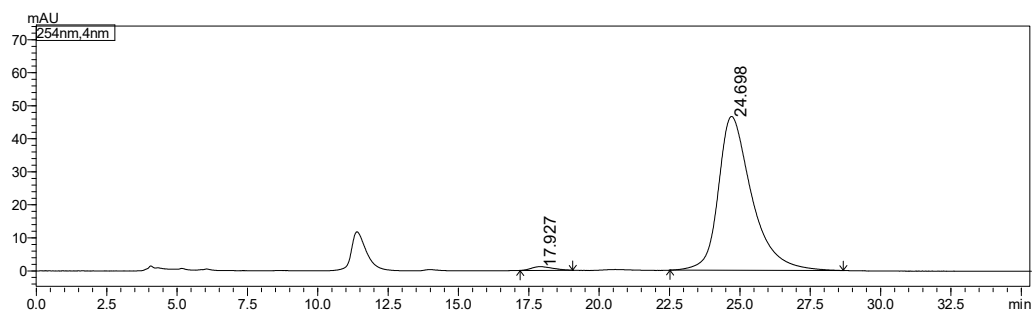

| Peak  | Ret. time | Area    | Height | Area%   | Height% |
|-------|-----------|---------|--------|---------|---------|
| 1     | 17.927    | 59370   | 1121   | 1.520   | 2.351   |
| 2     | 24.698    | 3847650 | 46571  | 98.480  | 97.649  |
| Total |           | 3907020 | 47692  | 100.000 | 100.000 |

**HPLC Spectrum of enantioenriched 3k.**

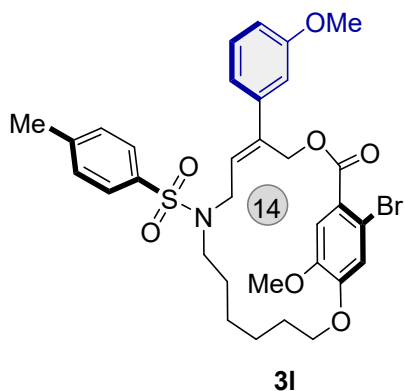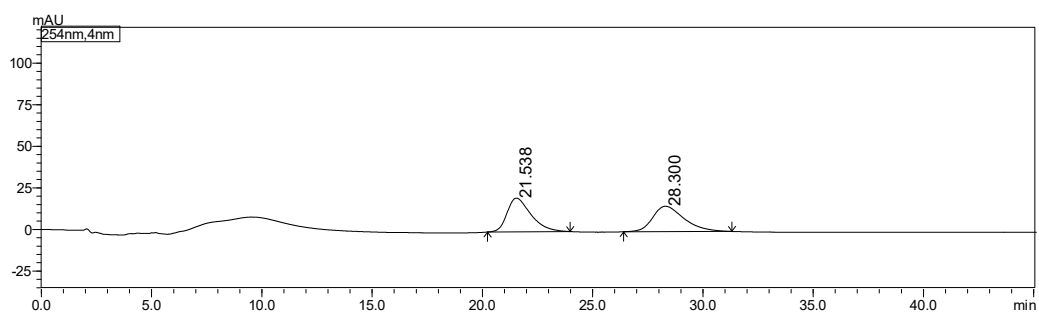

| Peak  | Ret. time | Area    | Height | Area%   | Height% |
|-------|-----------|---------|--------|---------|---------|
| 1     | 21.538    | 1531254 | 20288  | 50.248  | 57.038  |
| 2     | 28.300    | 1516141 | 15281  | 49.752  | 42.962  |
| Total |           | 3047395 | 35569  | 100.000 | 100.000 |

**HPLC Spectrum of racemic 3l.**

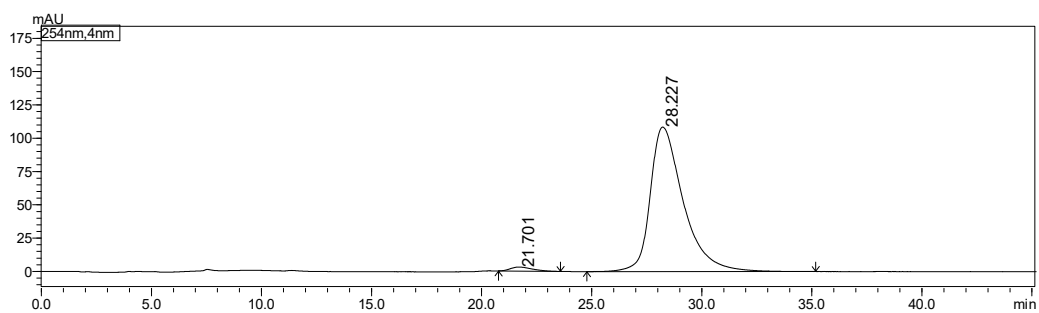

| Peak  | Ret. time | Area     | Height | Area%   | Height% |
|-------|-----------|----------|--------|---------|---------|
| 1     | 21.701    | 210686   | 3060   | 1.827   | 2.744   |
| 2     | 28.227    | 11323979 | 108437 | 98.173  | 97.256  |
| Total |           | 11534664 | 111497 | 100.000 | 100.000 |

**HPLC Spectrum of enantioenriched 3l.**

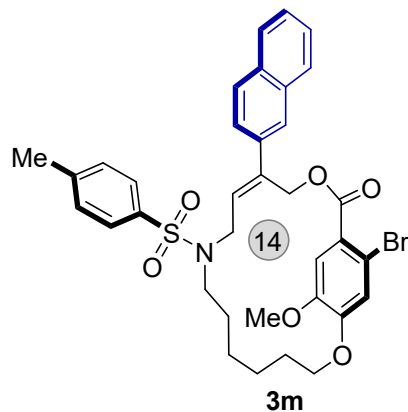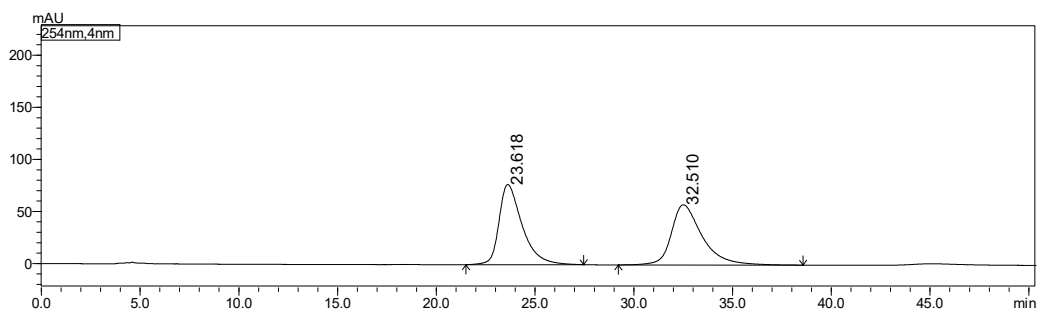

| Peak  | Ret. time | Area     | Height | Area%   | Height% |
|-------|-----------|----------|--------|---------|---------|
| 1     | 23.618    | 6280899  | 76947  | 49.950  | 57.111  |
| 2     | 32.510    | 6293533  | 57786  | 50.050  | 42.889  |
| Total |           | 12574432 | 134733 | 100.000 | 100.000 |

**HPLC Spectrum of racemic 3m.**

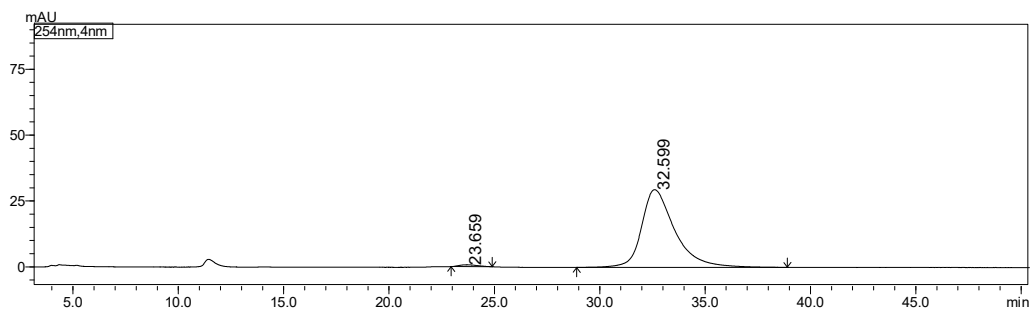

| Peak  | Ret. time | Area    | Height | Area%   | Height% |
|-------|-----------|---------|--------|---------|---------|
| 1     | 23.659    | 43042   | 713    | 1.310   | 2.362   |
| 2     | 32.599    | 3241804 | 29491  | 98.690  | 97.638  |
| Total |           | 3284846 | 30204  | 100.000 | 100.000 |

**HPLC Spectrum of enantioenriched 3m.**

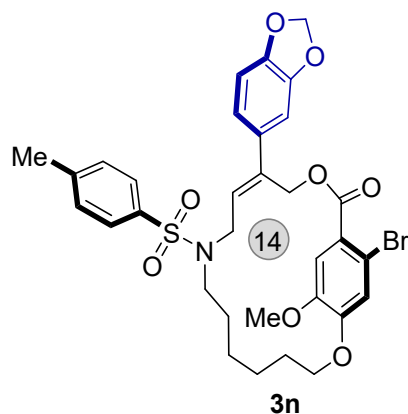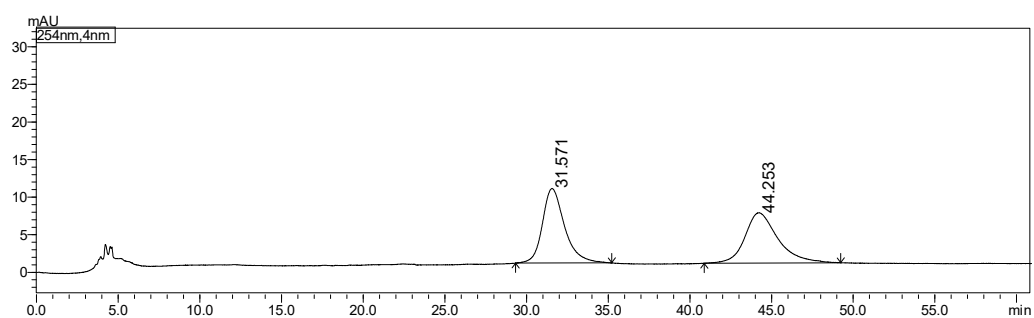

| Peak  | Ret. time | Area    | Height | Area%   | Height% |
|-------|-----------|---------|--------|---------|---------|
| 1     | 31.571    | 935113  | 9921   | 49.884  | 59.692  |
| 2     | 44.253    | 939460  | 6699   | 50.116  | 40.308  |
| Total |           | 1874574 | 16620  | 100.000 | 100.000 |

**HPLC Spectrum of racemic 3n.**

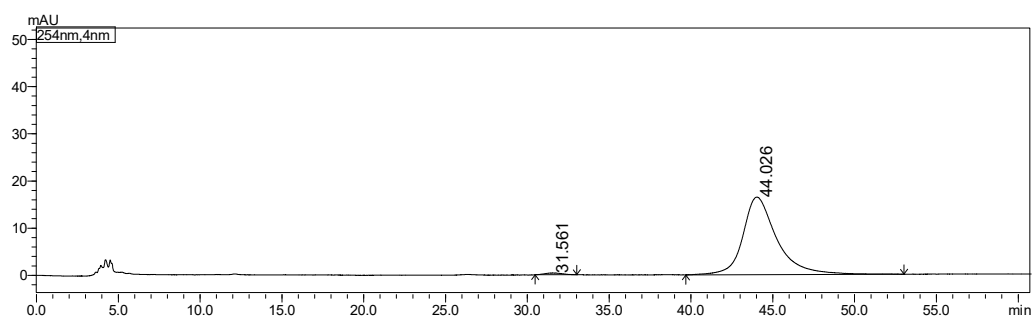

| Peak  | Ret. time | Area    | Height | Area%   | Height% |
|-------|-----------|---------|--------|---------|---------|
| 1     | 31.561    | 26190   | 376    | 1.093   | 2.235   |
| 2     | 44.026    | 2370282 | 16437  | 98.907  | 97.765  |
| Total |           | 2396472 | 16812  | 100.000 | 100.000 |

**HPLC Spectrum of enantioenriched 3n.**

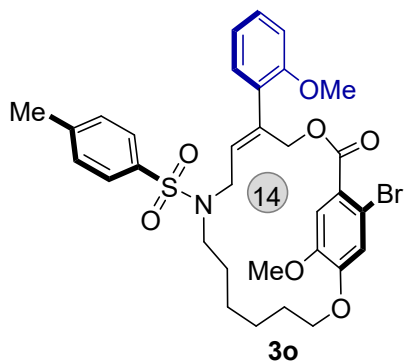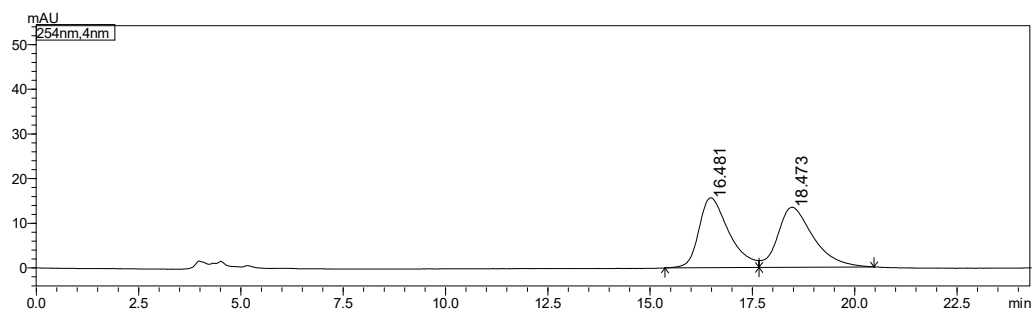

| Peak  | Ret. time | Area    | Height | Area%   | Height% |
|-------|-----------|---------|--------|---------|---------|
| 1     | 16.481    | 801210  | 15660  | 49.608  | 53.754  |
| 2     | 18.473    | 813884  | 13473  | 50.392  | 46.246  |
| Total |           | 1615094 | 29133  | 100.000 | 100.000 |

**HPLC Spectrum of racemic 3o.**

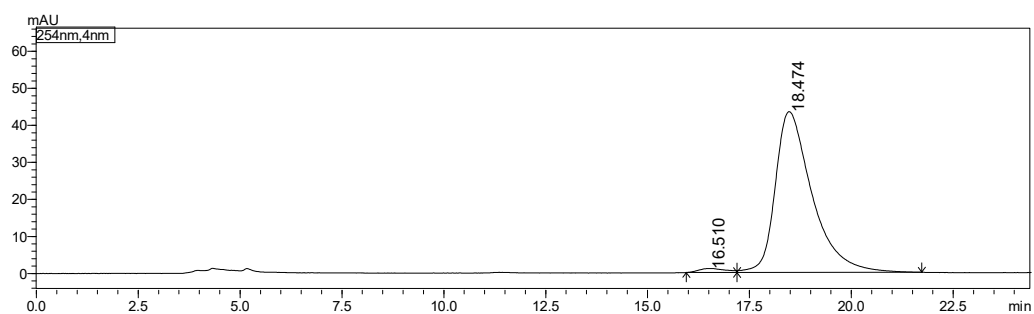

| Peak  | Ret. time | Area    | Height | Area%   | Height% |
|-------|-----------|---------|--------|---------|---------|
| 1     | 16.510    | 50061   | 1087   | 1.798   | 2.442   |
| 2     | 18.474    | 2733897 | 43417  | 98.202  | 97.558  |
| Total |           | 2783958 | 44504  | 100.000 | 100.000 |

**HPLC Spectrum of enantioenriched 3o.**



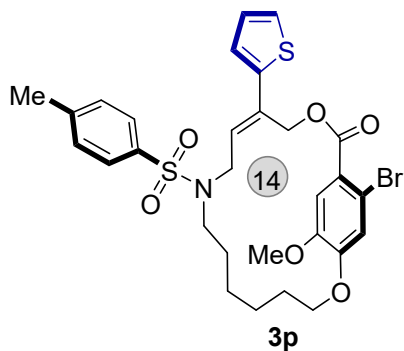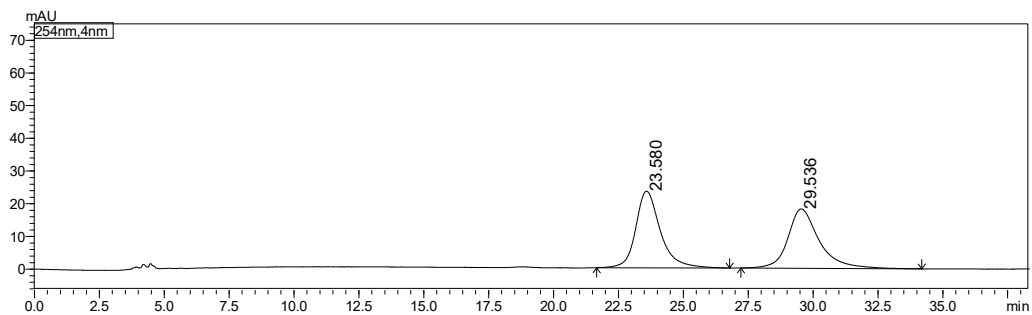

| Peak  | Ret. time | Area    | Height | Area%   | Height% |
|-------|-----------|---------|--------|---------|---------|
| 1     | 23.580    | 1551959 | 23456  | 50.291  | 56.360  |
| 2     | 29.536    | 1533995 | 18162  | 49.709  | 43.640  |
| Total |           | 3085954 | 41618  | 100.000 | 100.000 |

**HPLC Spectrum of racemic 3p.**

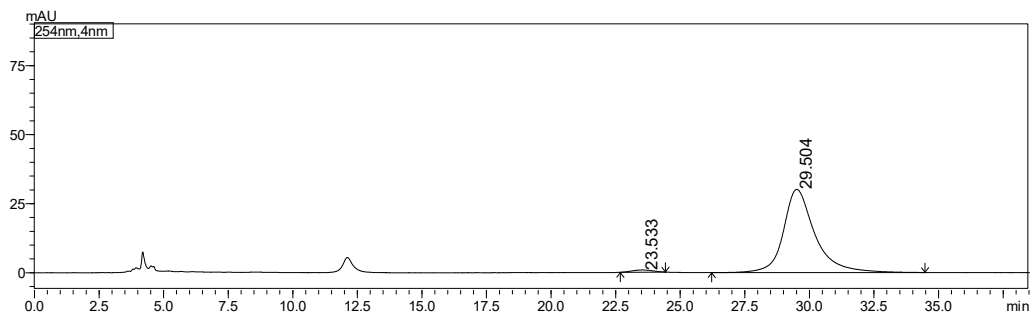

| Peak  | Ret. time | Area    | Height | Area%   | Height% |
|-------|-----------|---------|--------|---------|---------|
| 1     | 23.533    | 44550   | 820    | 1.711   | 2.651   |
| 2     | 29.504    | 2559817 | 30119  | 98.289  | 97.349  |
| Total |           | 2604367 | 30940  | 100.000 | 100.000 |

**HPLC Spectrum of enantioenriched 3p.**

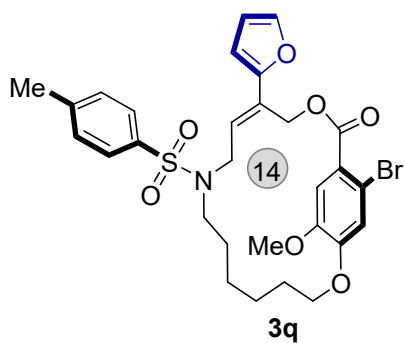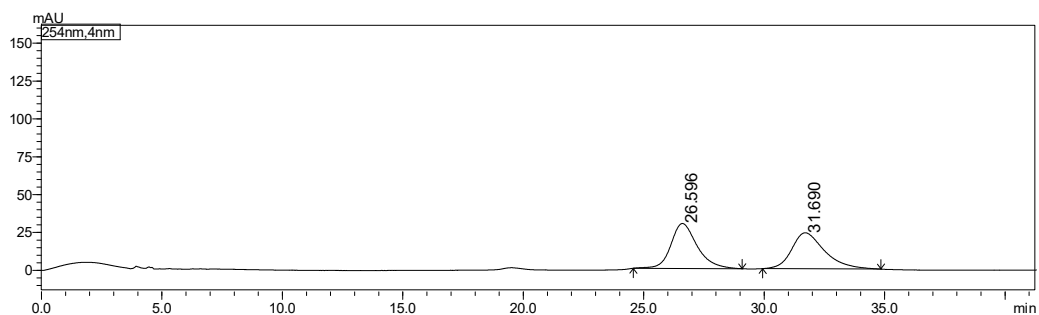

| Peak  | Ret. time | Area    | Height | Area%   | Height% |
|-------|-----------|---------|--------|---------|---------|
| 1     | 26.596    | 2262075 | 29718  | 49.999  | 55.585  |
| 2     | 31.690    | 2262151 | 23746  | 50.001  | 44.415  |
| Total |           | 4524226 | 53464  | 100.000 | 100.000 |

**HPLC Spectrum of racemic 3q.**

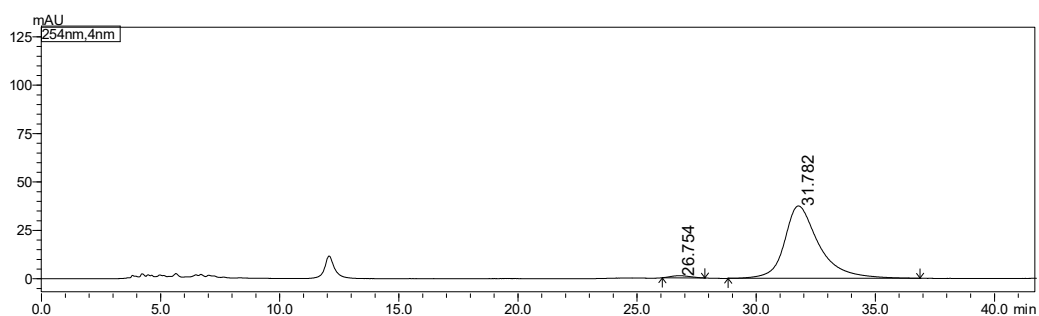

| Peak  | Ret. time | Area    | Height | Area%   | Height% |
|-------|-----------|---------|--------|---------|---------|
| 1     | 26.754    | 61828   | 1120   | 1.616   | 2.908   |
| 2     | 31.782    | 3763301 | 37404  | 98.384  | 97.092  |
| Total |           | 3825129 | 38525  | 100.000 | 100.000 |

**HPLC Spectrum of enantioenriched 3q.**

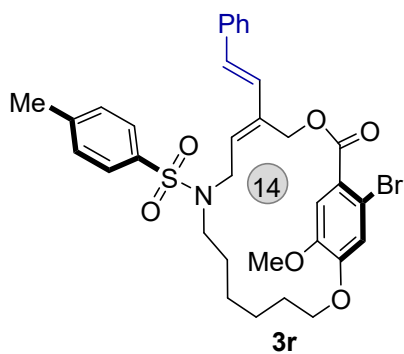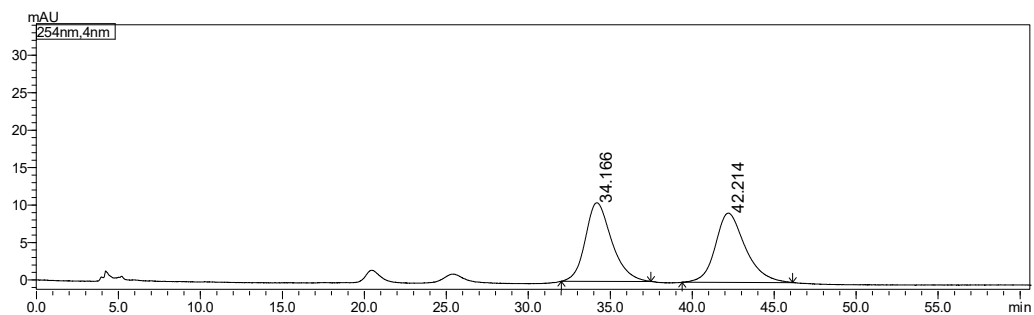

| Peak  | Ret. time | Area    | Height | Area%   | Height% |
|-------|-----------|---------|--------|---------|---------|
| 1     | 34.166    | 1174904 | 10488  | 49.920  | 53.140  |
| 2     | 42.214    | 1178678 | 9249   | 50.080  | 46.860  |
| Total |           | 2353582 | 19737  | 100.000 | 100.000 |

**HPLC Spectrum of racemic 3r.**

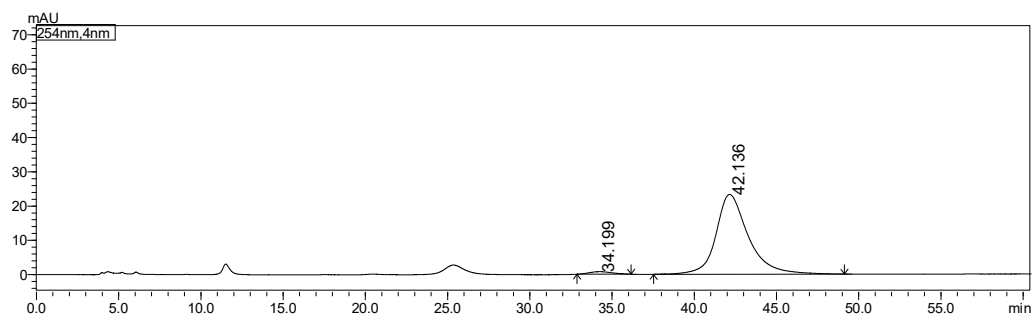

| Peak  | Ret. time | Area    | Height | Area%   | Height% |
|-------|-----------|---------|--------|---------|---------|
| 1     | 34.199    | 70756   | 759    | 2.171   | 3.157   |
| 2     | 42.136    | 3187911 | 23281  | 97.829  | 96.843  |
| Total |           | 3258667 | 24040  | 100.000 | 100.000 |

**HPLC Spectrum of enantioenriched 3r.**

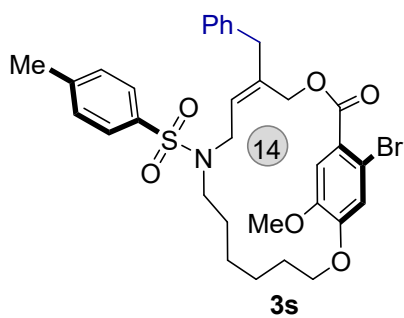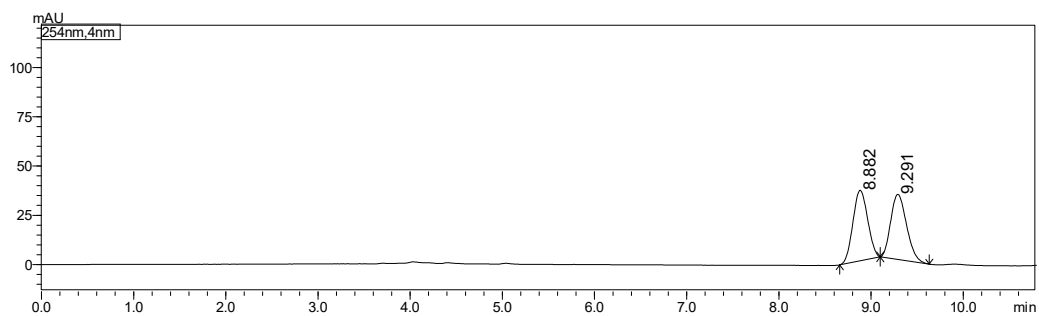

| Peak  | Ret. time | Area   | Height | Area%   | Height% |
|-------|-----------|--------|--------|---------|---------|
| 1     | 8.882     | 397804 | 35797  | 50.223  | 51.956  |
| 2     | 9.291     | 394266 | 33102  | 49.777  | 48.044  |
| Total |           | 792070 | 68898  | 100.000 | 100.000 |

**HPLC Spectrum of racemic 3s.**

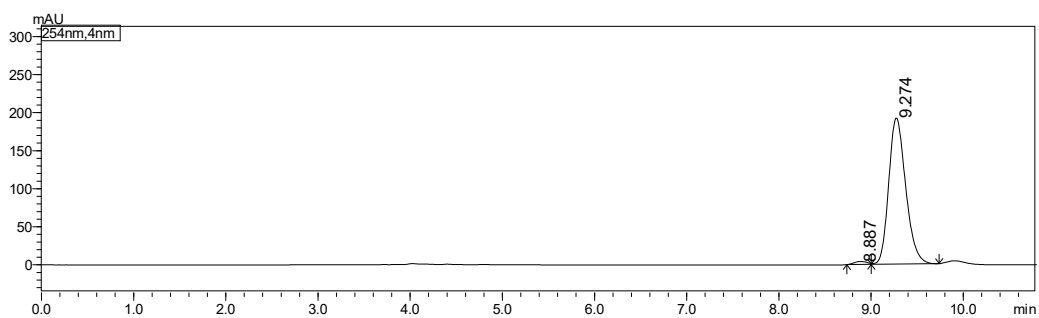

| Peak  | Ret. time | Area    | Height | Area%   | Height% |
|-------|-----------|---------|--------|---------|---------|
| 1     | 8.887     | 38289   | 3905   | 1.536   | 1.994   |
| 2     | 9.274     | 2454238 | 191962 | 98.464  | 98.006  |
| Total |           | 2492526 | 195867 | 100.000 | 100.000 |

**HPLC Spectrum of enantioenriched 3s.**

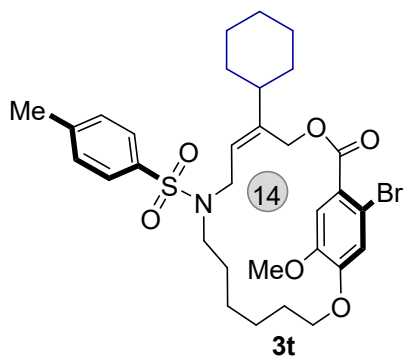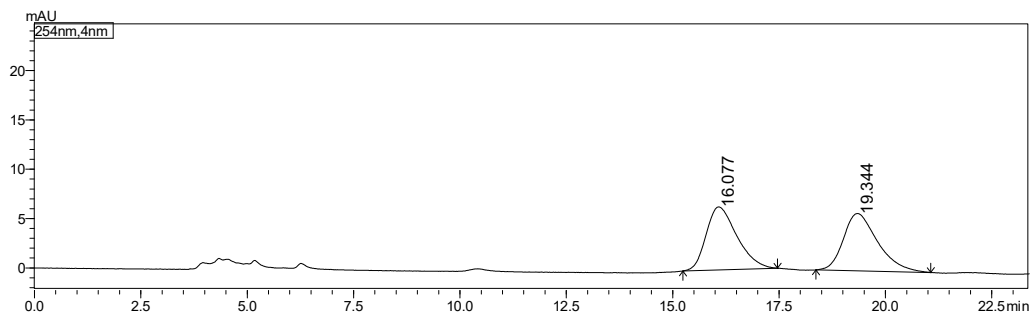

| Peak  | Ret. time | Area   | Height | Area%   | Height% |
|-------|-----------|--------|--------|---------|---------|
| 1     | 16.077    | 320879 | 6383   | 49.632  | 52.368  |
| 2     | 19.344    | 325633 | 5805   | 50.368  | 47.632  |
| Total |           | 646512 | 12188  | 100.000 | 100.000 |

**HPLC Spectrum of racemic 3t.**

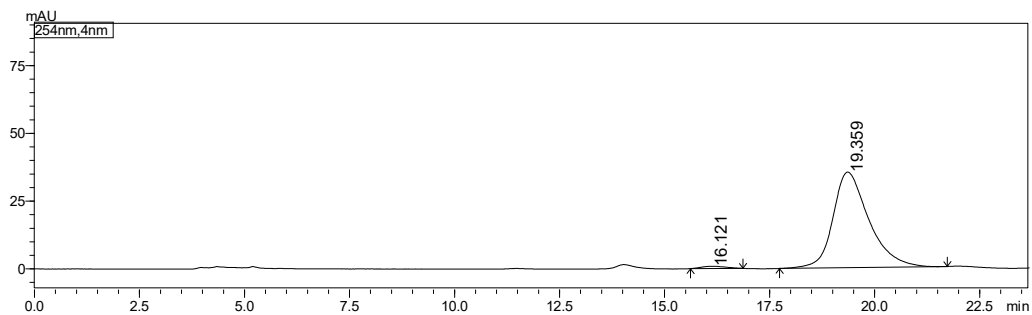

| Peak  | Ret. time | Area    | Height | Area%   | Height% |
|-------|-----------|---------|--------|---------|---------|
| 1     | 16.121    | 33006   | 823    | 1.551   | 2.281   |
| 2     | 19.359    | 2095556 | 35270  | 98.449  | 97.719  |
| Total |           | 2128563 | 36093  | 100.000 | 100.000 |

**HPLC Spectrum of enantioenriched 3t.**

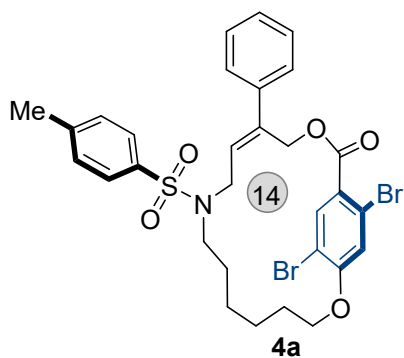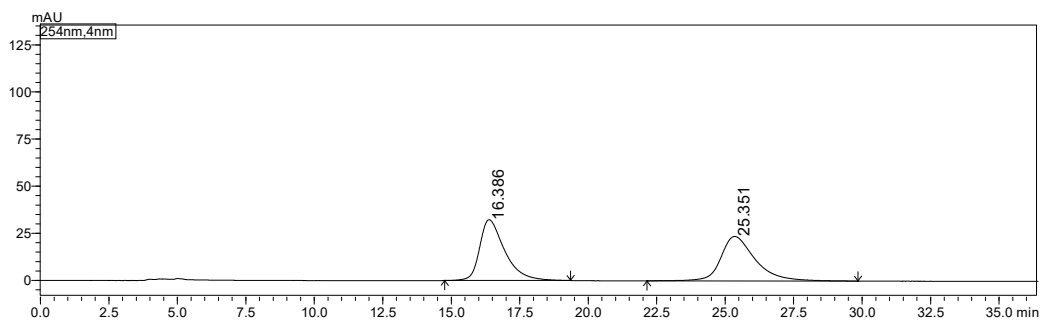

| Peak  | Ret. time | Area    | Height | Area%   | Height% |
|-------|-----------|---------|--------|---------|---------|
| 1     | 16.386    | 2056135 | 32276  | 49.910  | 57.748  |
| 2     | 25.351    | 2063570 | 23615  | 50.090  | 42.252  |
| Total |           | 4119705 | 55891  | 100.000 | 100.000 |

**HPLC Spectrum of racemic 4a.**

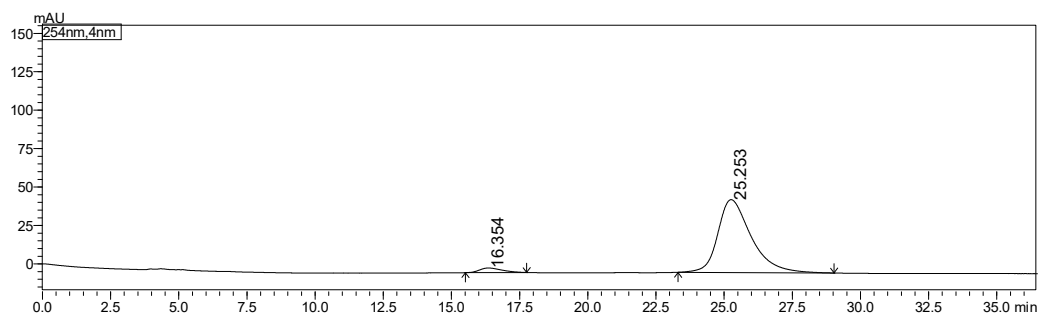

| Peak  | Ret. time | Area    | Height | Area%   | Height% |
|-------|-----------|---------|--------|---------|---------|
| 1     | 16.354    | 170606  | 3005   | 4.049   | 5.958   |
| 2     | 25.253    | 4042684 | 47424  | 95.951  | 94.042  |
| Total |           | 4213290 | 50429  | 100.000 | 100.000 |

**HPLC Spectrum of enantioenriched 4a.**

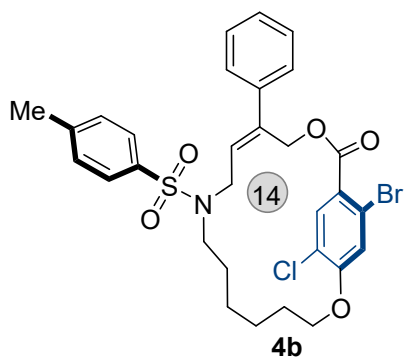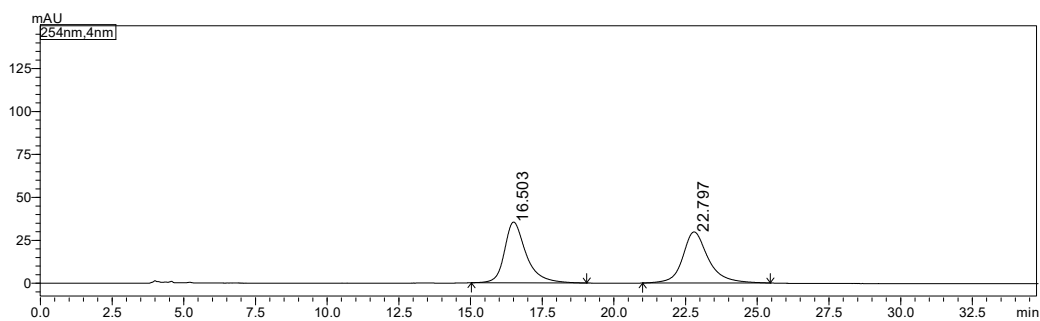

| Peak  | Ret. time | Area    | Height | Area%   | Height% |
|-------|-----------|---------|--------|---------|---------|
| 1     | 16.503    | 1867694 | 35416  | 50.150  | 54.344  |
| 2     | 22.797    | 1856499 | 29754  | 49.850  | 45.656  |
| Total |           | 3724192 | 65170  | 100.000 | 100.000 |

**HPLC Spectrum of racemic 4b.**

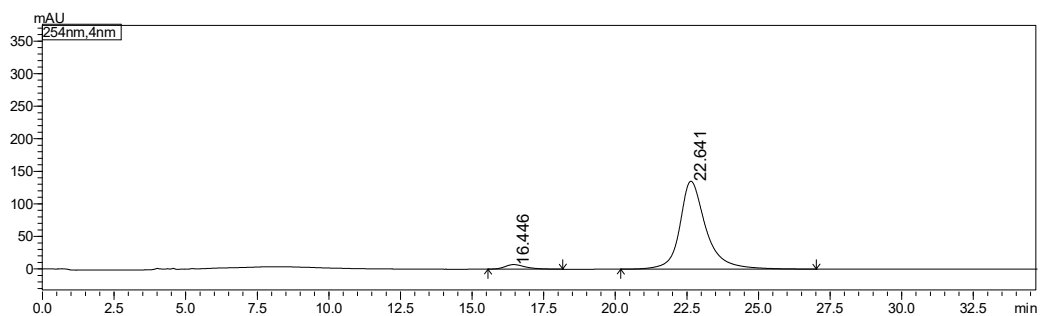

| Peak  | Ret. time | Area    | Height | Area%   | Height% |
|-------|-----------|---------|--------|---------|---------|
| 1     | 16.446    | 355083  | 7061   | 3.968   | 4.967   |
| 2     | 22.641    | 8593236 | 135080 | 96.032  | 95.033  |
| Total |           | 8948319 | 142141 | 100.000 | 100.000 |

**HPLC Spectrum of enantioenriched 4b.**

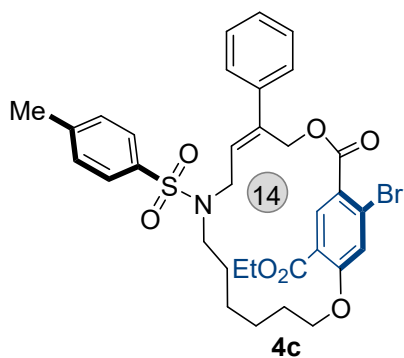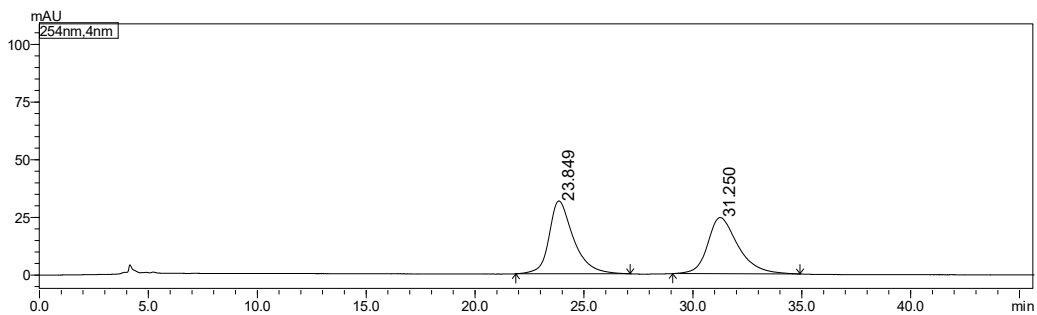

| Peak  | Ret. time | Area    | Height | Area%   | Height% |
|-------|-----------|---------|--------|---------|---------|
| 1     | 23.849    | 2461624 | 31553  | 50.939  | 56.431  |
| 2     | 31.250    | 2370914 | 24361  | 49.061  | 43.569  |
| Total |           | 4832539 | 55915  | 100.000 | 100.000 |

**HPLC Spectrum of racemic 4c.**

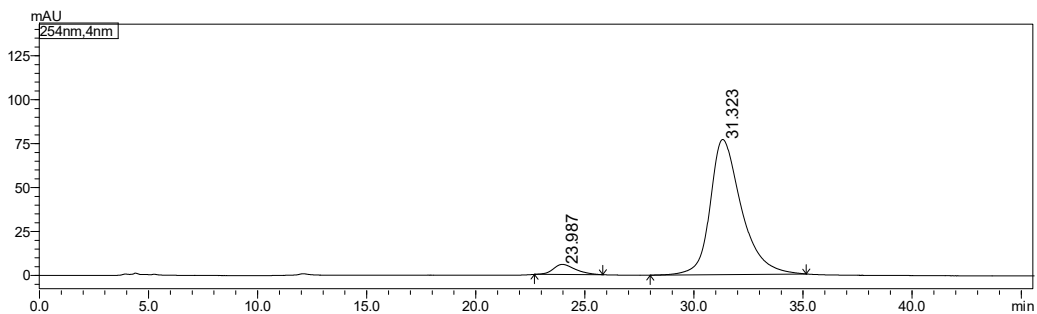

| Peak  | Ret. time | Area    | Height | Area%   | Height% |
|-------|-----------|---------|--------|---------|---------|
| 1     | 23.987    | 408000  | 5760   | 5.048   | 6.967   |
| 2     | 31.323    | 7674385 | 76915  | 94.952  | 93.033  |
| Total |           | 8082384 | 82675  | 100.000 | 100.000 |

**HPLC Spectrum of enantioenriched 4c.**



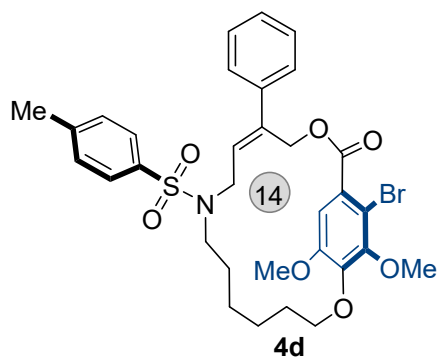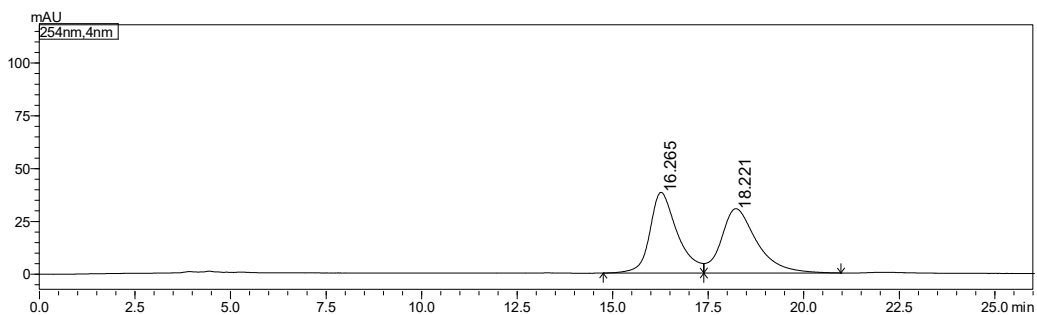

| Peak  | Ret. time | Area    | Height | Area%   | Height% |
|-------|-----------|---------|--------|---------|---------|
| 1     | 16.265    | 1916040 | 38200  | 49.343  | 55.637  |
| 2     | 18.221    | 1967093 | 30460  | 50.657  | 44.363  |
| Total |           | 3883134 | 68660  | 100.000 | 100.000 |

**HPLC Spectrum of racemic 4d.**

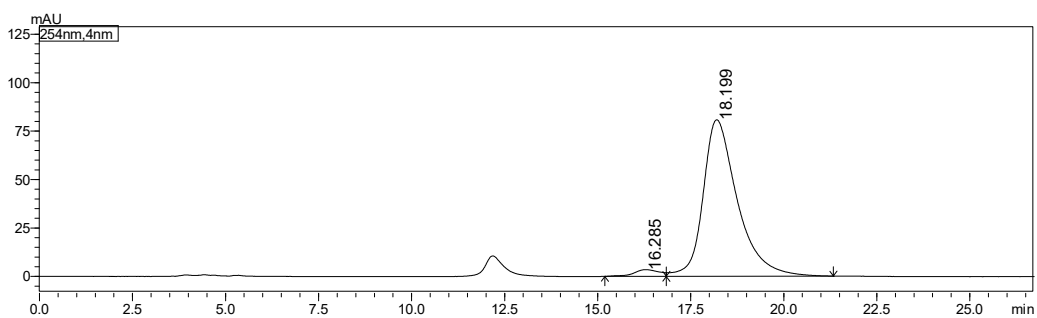

| Peak  | Ret. time | Area    | Height | Area%   | Height% |
|-------|-----------|---------|--------|---------|---------|
| 1     | 16.285    | 164443  | 3460   | 3.075   | 4.107   |
| 2     | 18.199    | 5183813 | 80790  | 96.925  | 95.893  |
| Total |           | 5348257 | 84250  | 100.000 | 100.000 |

**HPLC Spectrum of enantioenriched 4d.**

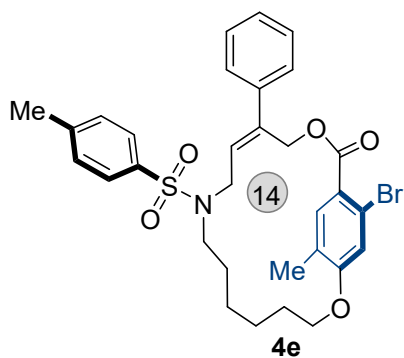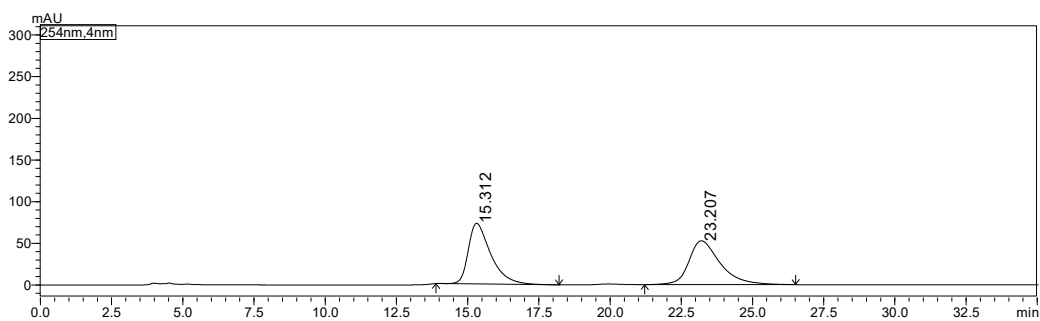

| Peak  | Ret. time | Area    | Height | Area%   | Height% |
|-------|-----------|---------|--------|---------|---------|
| 1     | 15.312    | 4000111 | 72756  | 49.707  | 58.014  |
| 2     | 23.207    | 4047212 | 52656  | 50.293  | 41.986  |
| Total |           | 8047324 | 125412 | 100.000 | 100.000 |

**HPLC Spectrum of racemic 4e.**

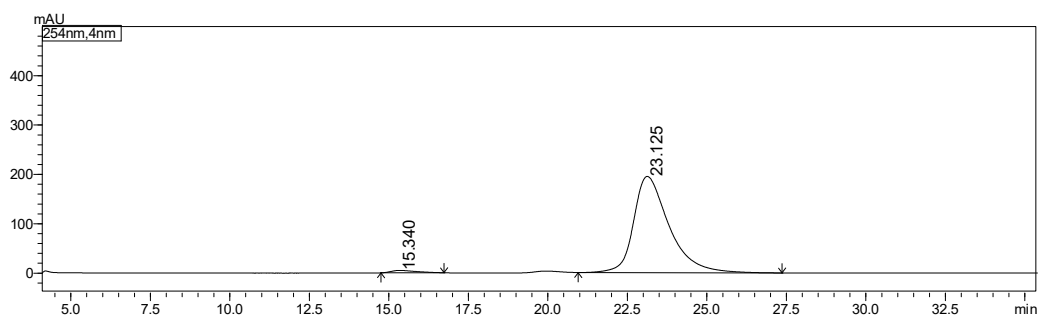

| Peak  | Ret. time | Area     | Height | Area%   | Height% |
|-------|-----------|----------|--------|---------|---------|
| 1     | 15.340    | 269993   | 4929   | 1.748   | 2.466   |
| 2     | 23.125    | 15175246 | 195001 | 98.252  | 97.534  |
| Total |           | 15445239 | 199930 | 100.000 | 100.000 |

**HPLC Spectrum of enantioenriched 4e.**

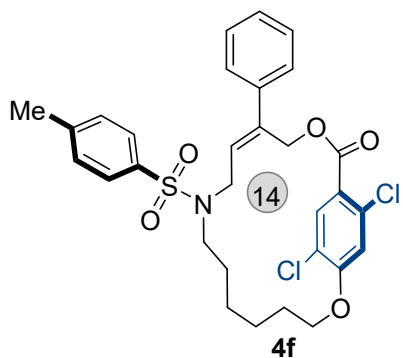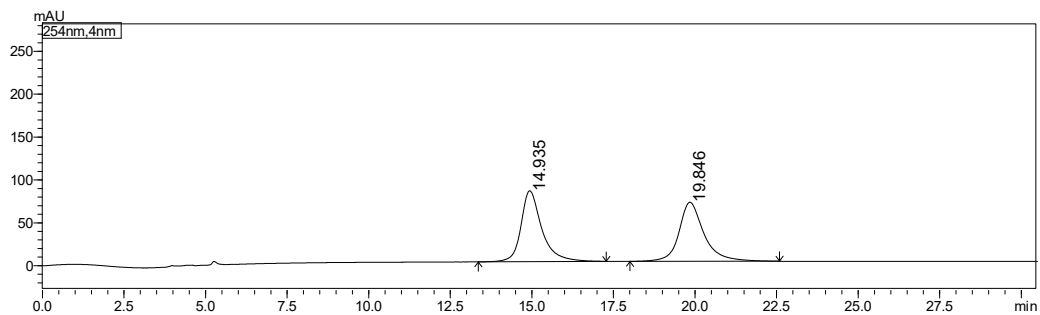

| Peak  | Ret. time | Area    | Height | Area%   | Height% |
|-------|-----------|---------|--------|---------|---------|
| 1     | 14.935    | 3673716 | 82683  | 49.967  | 54.535  |
| 2     | 19.846    | 3678567 | 68931  | 50.033  | 45.465  |
| Total |           | 7352283 | 151614 | 100.000 | 100.000 |

**HPLC Spectrum of racemic 4f.**

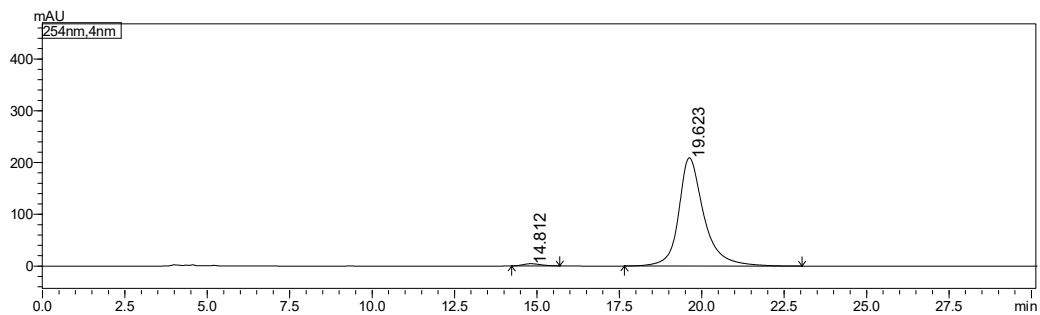

| Peak  | Ret. time | Area     | Height | Area%   | Height% |
|-------|-----------|----------|--------|---------|---------|
| 1     | 14.812    | 160368   | 4274   | 1.417   | 2.003   |
| 2     | 19.623    | 11160371 | 209174 | 98.583  | 97.997  |
| Total |           | 11320738 | 213448 | 100.000 | 100.000 |

**HPLC Spectrum of enantioenriched 4f.**

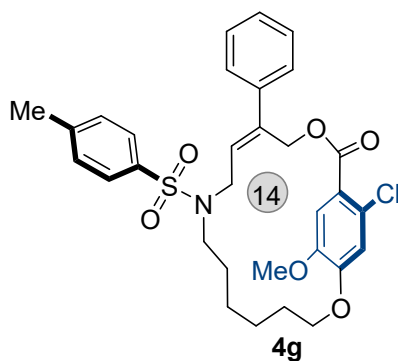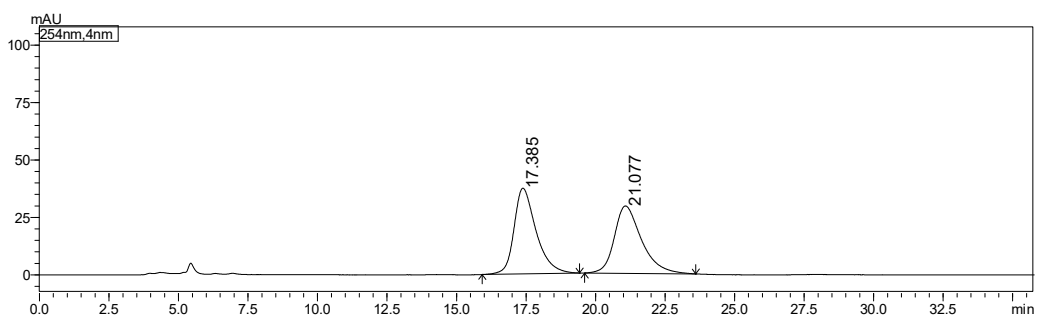

| Peak  | Ret. time | Area    | Height | Area%   | Height% |
|-------|-----------|---------|--------|---------|---------|
| 1     | 17.385    | 2058399 | 37320  | 50.716  | 55.977  |
| 2     | 21.077    | 2000310 | 29350  | 49.284  | 44.023  |
| Total |           | 4058709 | 66670  | 100.000 | 100.000 |

**HPLC Spectrum of racemic 4g.**

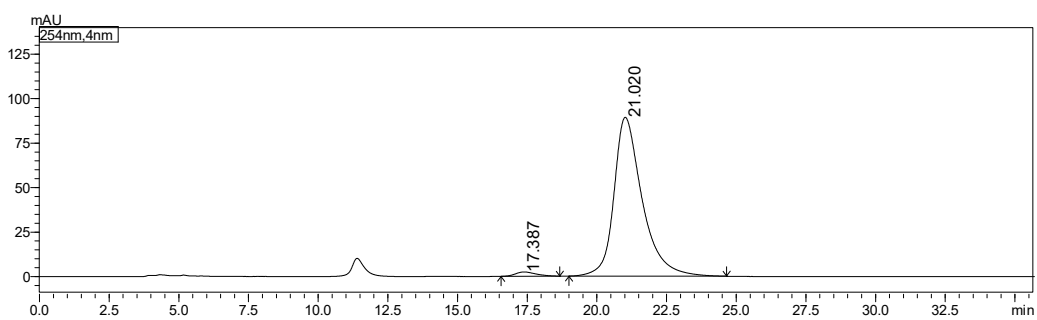

| Peak  | Ret. time | Area    | Height | Area%   | Height% |
|-------|-----------|---------|--------|---------|---------|
| 1     | 17.387    | 123455  | 2425   | 1.919   | 2.643   |
| 2     | 21.020    | 6308476 | 89298  | 98.081  | 97.357  |
| Total |           | 6431931 | 91722  | 100.000 | 100.000 |

**HPLC Spectrum of enantioenriched 4g.**

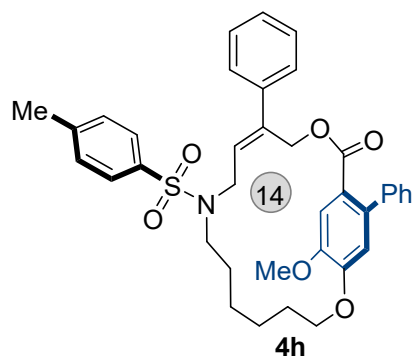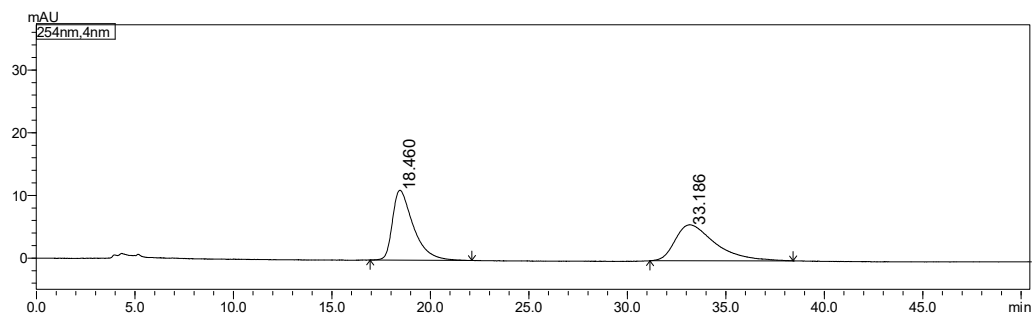

| Peak  | Ret. time | Area    | Height | Area%   | Height% |
|-------|-----------|---------|--------|---------|---------|
| 1     | 18.460    | 820392  | 11155  | 50.229  | 66.059  |
| 2     | 33.186    | 812912  | 5731   | 49.771  | 33.941  |
| Total |           | 1633305 | 16886  | 100.000 | 100.000 |

**HPLC Spectrum of racemic 4h.**

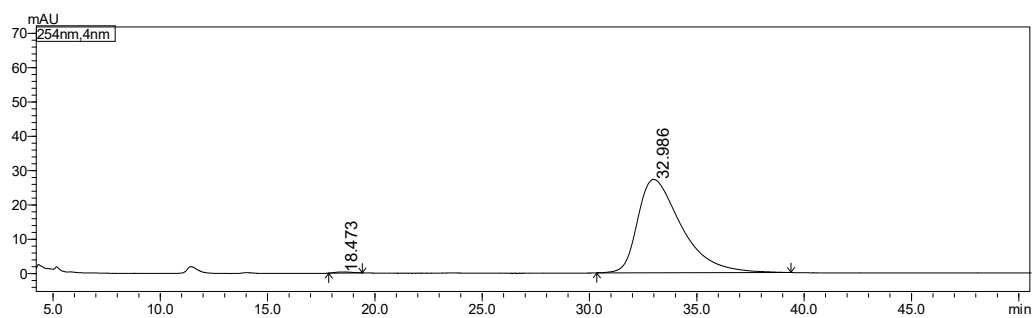

| Peak  | Ret. time | Area    | Height | Area%   | Height% |
|-------|-----------|---------|--------|---------|---------|
| 1     | 18.473    | 16492   | 321    | 0.426   | 1.165   |
| 2     | 32.986    | 3855793 | 27207  | 99.574  | 98.835  |
| Total |           | 3872286 | 27528  | 100.000 | 100.000 |

**HPLC Spectrum of enantioenriched 4h.**

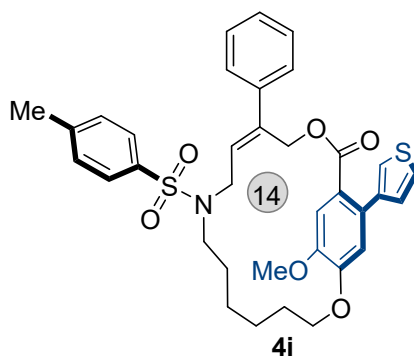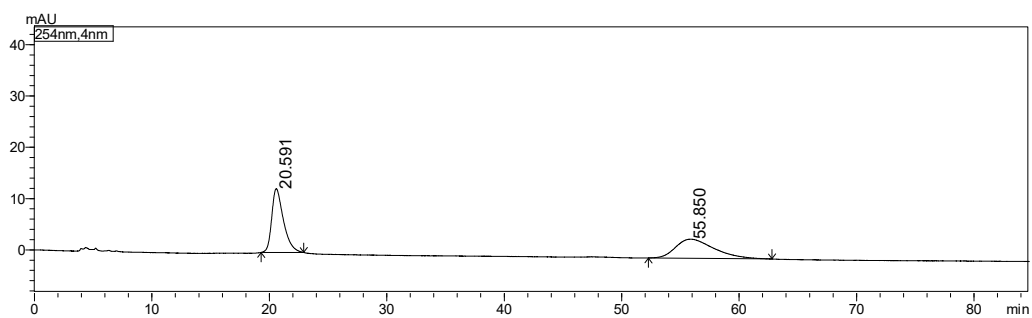

| Peak  | Ret. time | Area    | Height | Area%   | Height% |
|-------|-----------|---------|--------|---------|---------|
| 1     | 20.591    | 864170  | 12442  | 50.380  | 76.908  |
| 2     | 55.850    | 851135  | 3736   | 49.620  | 23.092  |
| Total |           | 1715305 | 16178  | 100.000 | 100.000 |

**HPLC Spectrum of racemic 4i.**

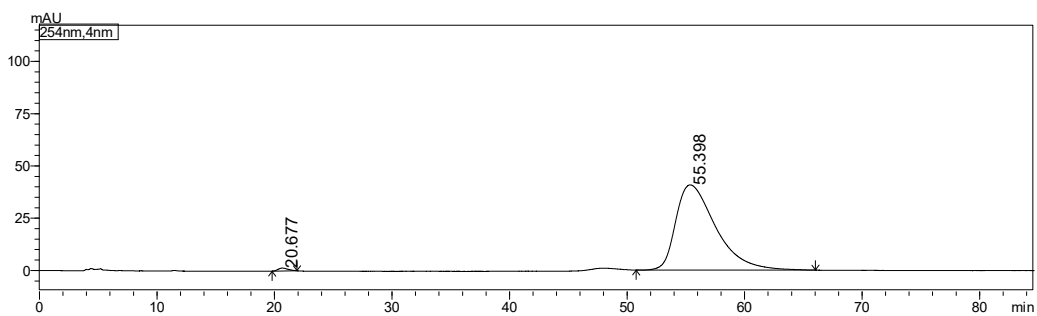

| Peak  | Ret. time | Area    | Height | Area%   | Height% |
|-------|-----------|---------|--------|---------|---------|
| 1     | 20.677    | 83370   | 1391   | 0.855   | 3.300   |
| 2     | 55.398    | 9663069 | 40768  | 99.145  | 96.700  |
| Total |           | 9746439 | 42159  | 100.000 | 100.000 |

**HPLC Spectrum of enantioenriched 4i.**

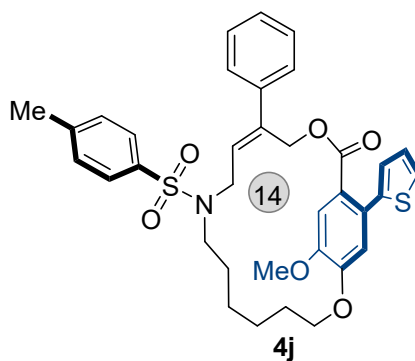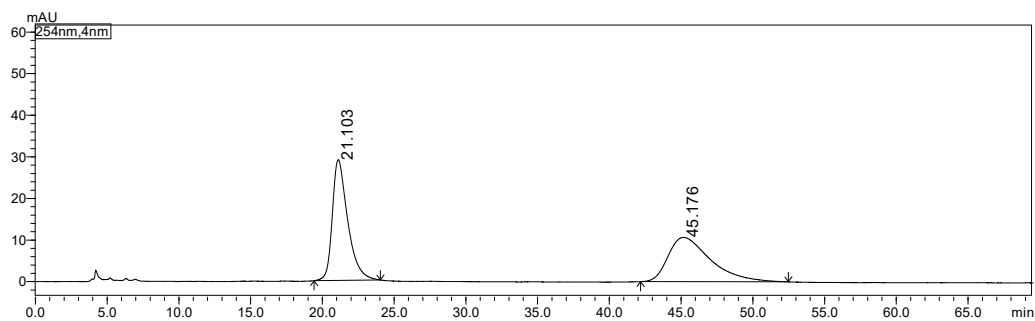

| Peak  | Ret. time | Area    | Height | Area%   | Height% |
|-------|-----------|---------|--------|---------|---------|
| 1     | 21.103    | 2170098 | 29045  | 49.745  | 73.112  |
| 2     | 45.176    | 2192357 | 10682  | 50.255  | 26.888  |
| Total |           | 4362456 | 39728  | 100.000 | 100.000 |

**HPLC Spectrum of racemic 4j.**

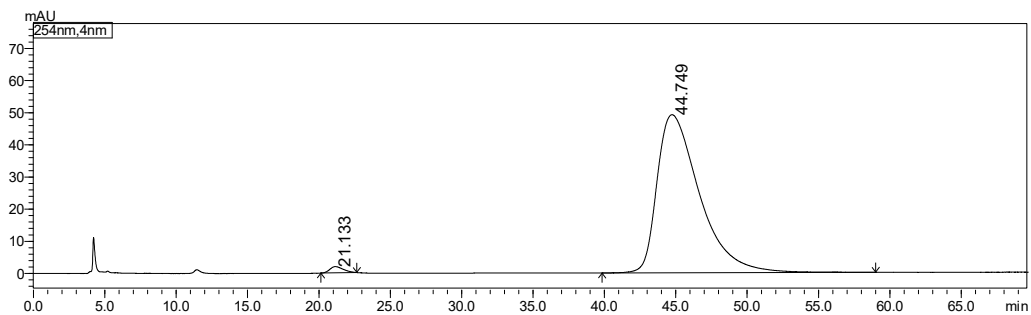

| Peak  | Ret. time | Area     | Height | Area%   | Height% |
|-------|-----------|----------|--------|---------|---------|
| 1     | 21.133    | 128731   | 1960   | 1.249   | 3.831   |
| 2     | 44.749    | 10181668 | 49200  | 98.751  | 96.169  |
| Total |           | 10310399 | 51160  | 100.000 | 100.000 |

**HPLC Spectrum of enantioenriched 4j.**

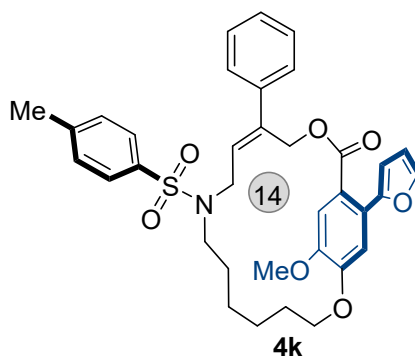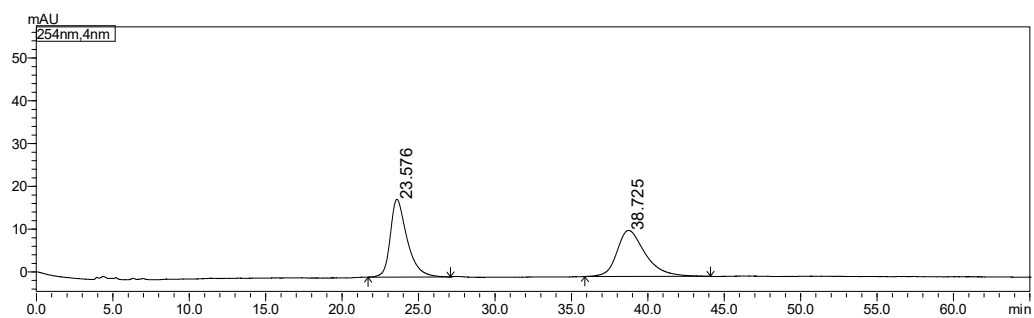

| Peak  | Ret. time | Area    | Height | Area%   | Height% |
|-------|-----------|---------|--------|---------|---------|
| 1     | 23.576    | 1390590 | 18161  | 49.981  | 62.759  |
| 2     | 38.725    | 1391640 | 10776  | 50.019  | 37.241  |
| Total |           | 2782230 | 28937  | 100.000 | 100.000 |

**HPLC Spectrum of racemic 4k.**

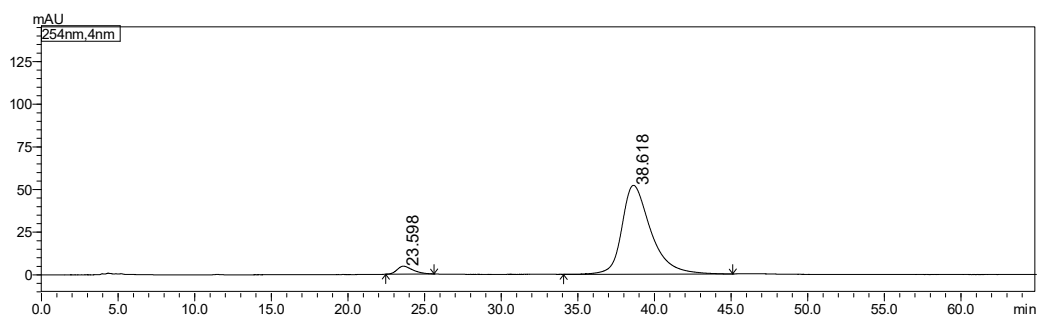

| Peak  | Ret. time | Area    | Height | Area%   | Height% |
|-------|-----------|---------|--------|---------|---------|
| 1     | 23.598    | 334754  | 4669   | 4.666   | 8.231   |
| 2     | 38.618    | 6839277 | 52054  | 95.334  | 91.769  |
| Total |           | 7174031 | 56723  | 100.000 | 100.000 |

**HPLC Spectrum of enantioenriched 4k.**



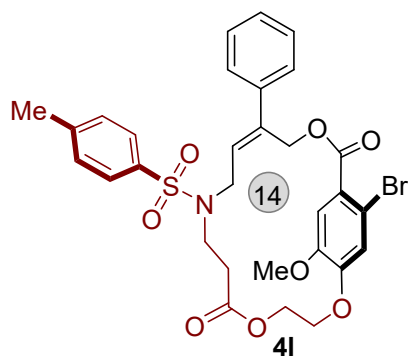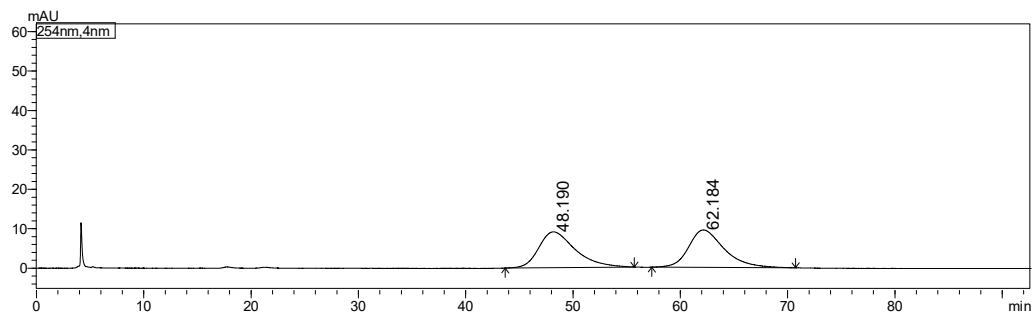

| Peak  | Ret. time | Area    | Height | Area%   | Height% |
|-------|-----------|---------|--------|---------|---------|
| 1     | 48.190    | 2147996 | 9085   | 49.464  | 48.843  |
| 2     | 62.184    | 2194562 | 9515   | 50.536  | 51.157  |
| Total |           | 4342558 | 18601  | 100.000 | 100.000 |

**HPLC Spectrum of racemic 4l.**

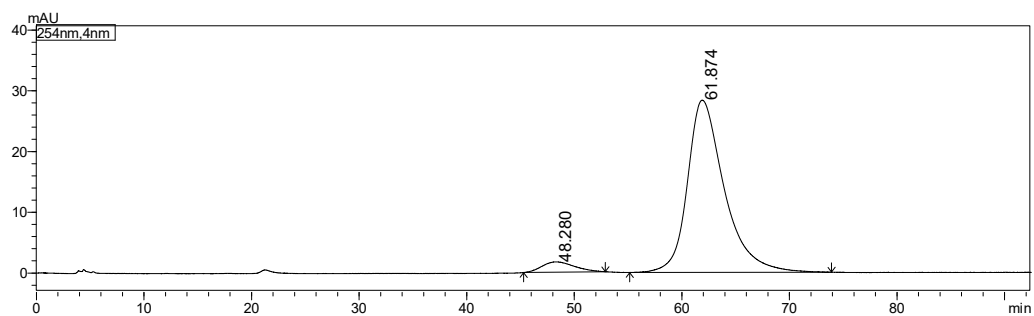

| Peak  | Ret. time | Area    | Height | Area%   | Height% |
|-------|-----------|---------|--------|---------|---------|
| 1     | 48.280    | 355424  | 1703   | 4.992   | 5.667   |
| 2     | 61.874    | 6764209 | 28355  | 95.008  | 94.333  |
| Total |           | 7119633 | 30058  | 100.000 | 100.000 |

**HPLC Spectrum of enantioenriched 4l.**

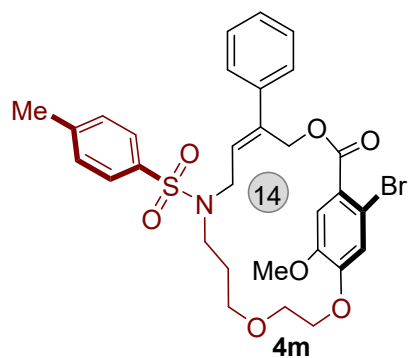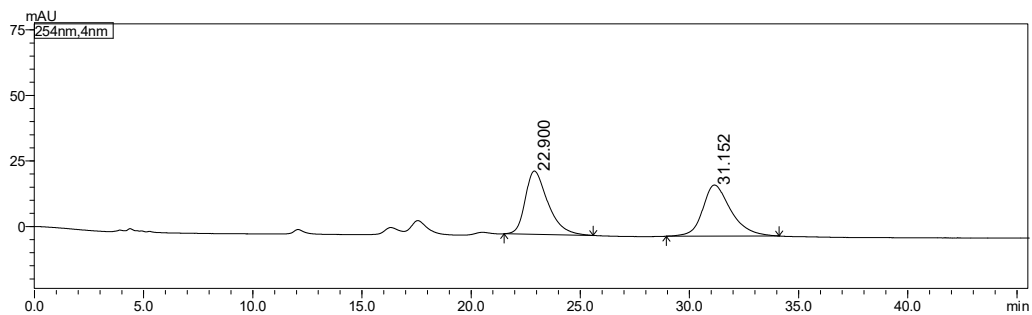

| Peak  | Ret. time | Area    | Height | Area%   | Height% |
|-------|-----------|---------|--------|---------|---------|
| 1     | 22.900    | 1748656 | 24155  | 49.761  | 55.328  |
| 2     | 31.152    | 1765463 | 19502  | 50.239  | 44.672  |
| Total |           | 3514118 | 43657  | 100.000 | 100.000 |

**HPLC Spectrum of racemic 4m.**

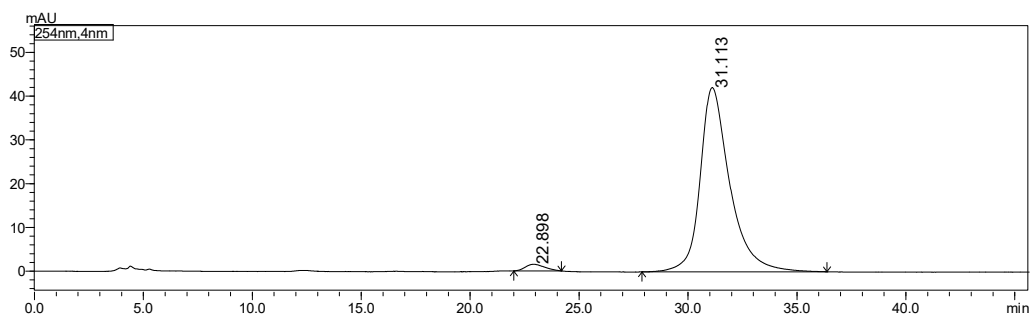

| Peak  | Ret. time | Area    | Height | Area%   | Height% |
|-------|-----------|---------|--------|---------|---------|
| 1     | 22.898    | 93645   | 1525   | 2.283   | 3.493   |
| 2     | 31.113    | 4008824 | 42124  | 97.717  | 96.507  |
| Total |           | 4102469 | 43649  | 100.000 | 100.000 |

**HPLC Spectrum of enantioenriched 4m.**

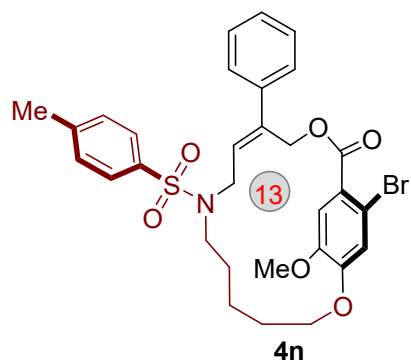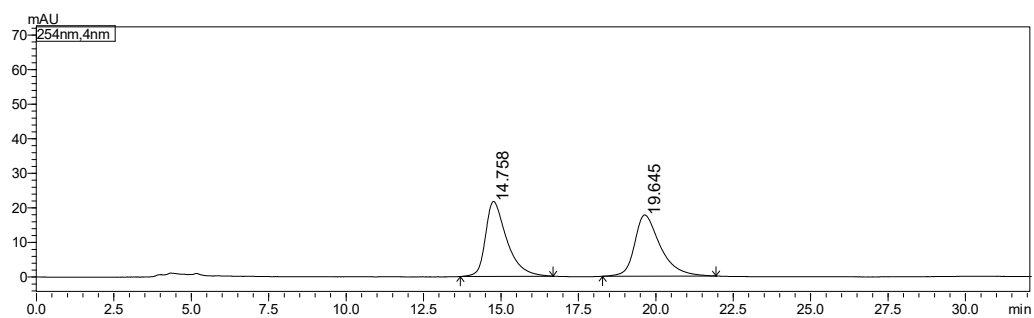

| Peak  | Ret. time | Area    | Height | Area%   | Height% |
|-------|-----------|---------|--------|---------|---------|
| 1     | 14.758    | 1036827 | 21677  | 50.241  | 55.026  |
| 2     | 19.645    | 1026872 | 17717  | 49.759  | 44.974  |
| Total |           | 2063699 | 39394  | 100.000 | 100.000 |

**HPLC Spectrum of racemic 4n.**

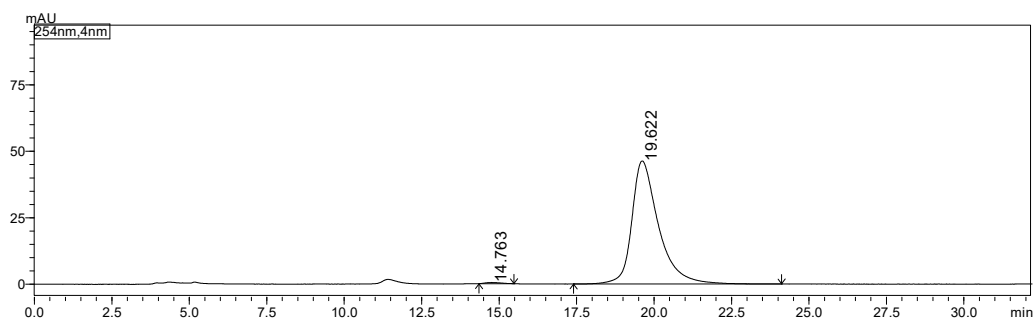

| Peak  | Ret. time | Area    | Height | Area%   | Height% |
|-------|-----------|---------|--------|---------|---------|
| 1     | 14.763    | 15793   | 456    | 0.564   | 0.977   |
| 2     | 19.622    | 2784765 | 46261  | 99.436  | 99.023  |
| Total |           | 2800558 | 46717  | 100.000 | 100.000 |

**HPLC Spectrum of enantioenriched 4n.**

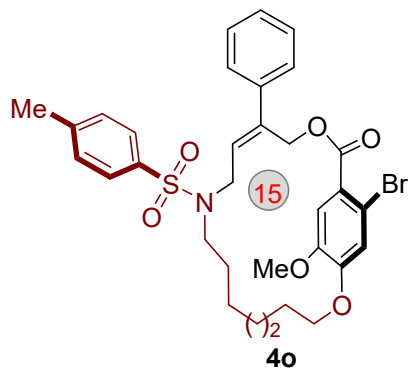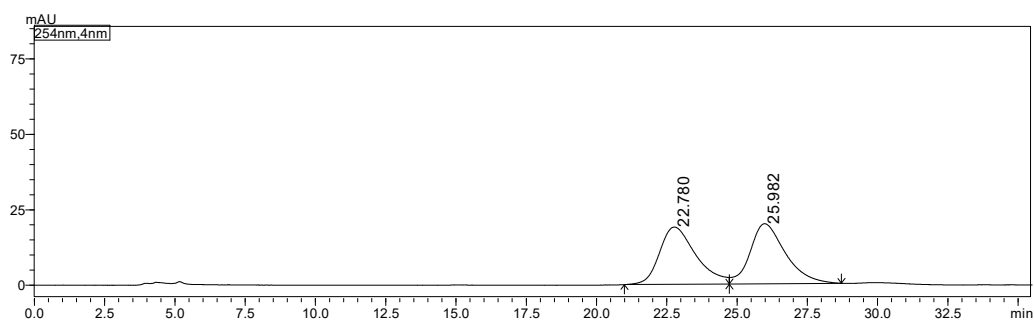

| Peak  | Ret. time | Area    | Height | Area%   | Height% |
|-------|-----------|---------|--------|---------|---------|
| 1     | 22.780    | 1708569 | 18981  | 49.497  | 48.799  |
| 2     | 25.982    | 1743303 | 19916  | 50.503  | 51.201  |
| Total |           | 3451872 | 38897  | 100.000 | 100.000 |

**HPLC Spectrum of racemic 4o.**

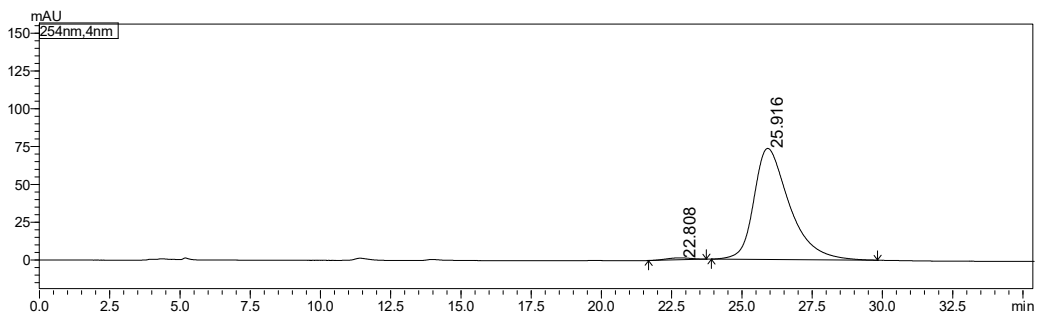

| Peak  | Ret. time | Area    | Height | Area%   | Height% |
|-------|-----------|---------|--------|---------|---------|
| 1     | 22.808    | 79481   | 1274   | 1.212   | 1.704   |
| 2     | 25.916    | 6476987 | 73461  | 98.788  | 98.296  |
| Total |           | 6556469 | 74735  | 100.000 | 100.000 |

**HPLC Spectrum of enantioenriched 4o.**

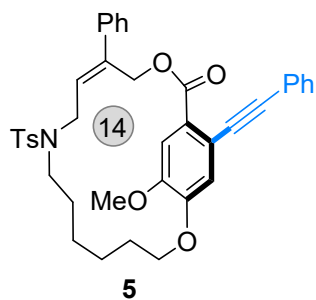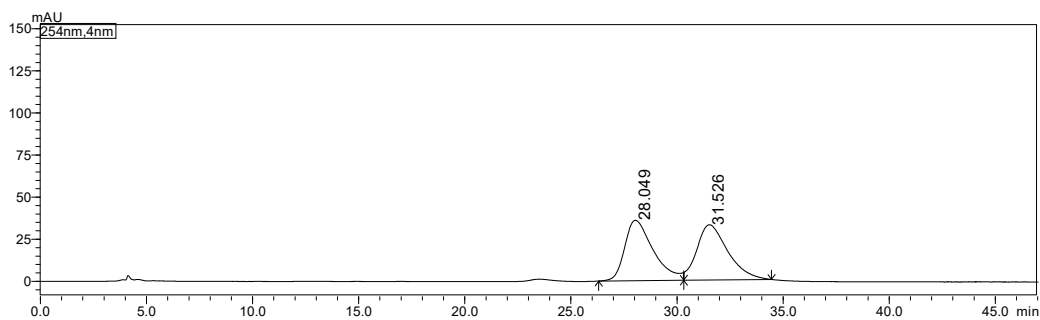

| Peak  | Ret. time | Area    | Height | Area%   | Height% |
|-------|-----------|---------|--------|---------|---------|
| 1     | 28.049    | 3363633 | 35882  | 50.142  | 52.207  |
| 2     | 31.526    | 3344565 | 32848  | 49.858  | 47.793  |
| Total |           | 6708197 | 68730  | 100.000 | 100.000 |

**HPLC Spectrum of racemic 5.**

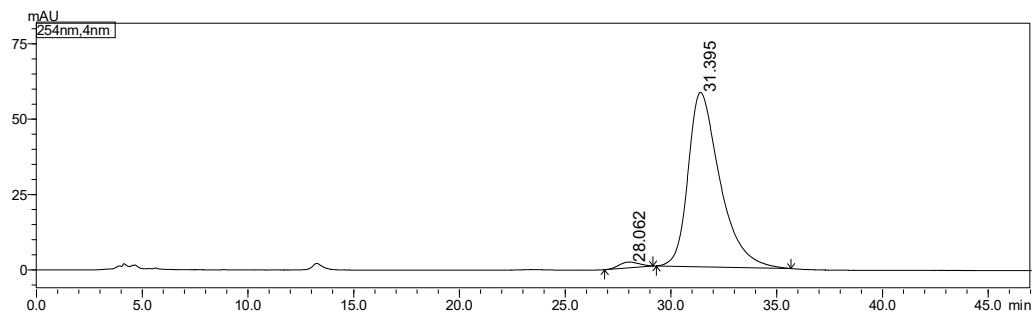

| Peak  | Ret. time | Area    | Height | Area%   | Height% |
|-------|-----------|---------|--------|---------|---------|
| 1     | 28.062    | 126995  | 1913   | 2.050   | 3.196   |
| 2     | 31.395    | 6067421 | 57929  | 97.950  | 96.804  |
| Total |           | 6194416 | 59842  | 100.000 | 100.000 |

**HPLC Spectrum of enantioenriched 5.**

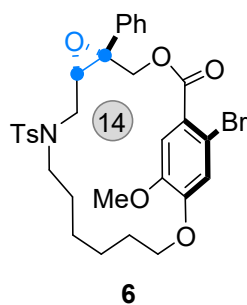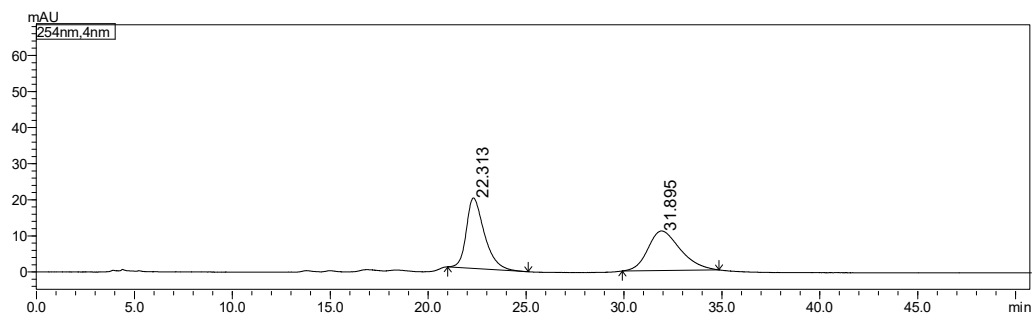

| Peak  | Ret. time | Area    | Height | Area%   | Height% |
|-------|-----------|---------|--------|---------|---------|
| 1     | 22.313    | 1252566 | 19496  | 49.758  | 64.012  |
| 2     | 31.895    | 1264765 | 10961  | 50.242  | 35.988  |
| Total |           | 2517331 | 30457  | 100.000 | 100.000 |

**HPLC Spectrum of racemic 6.**

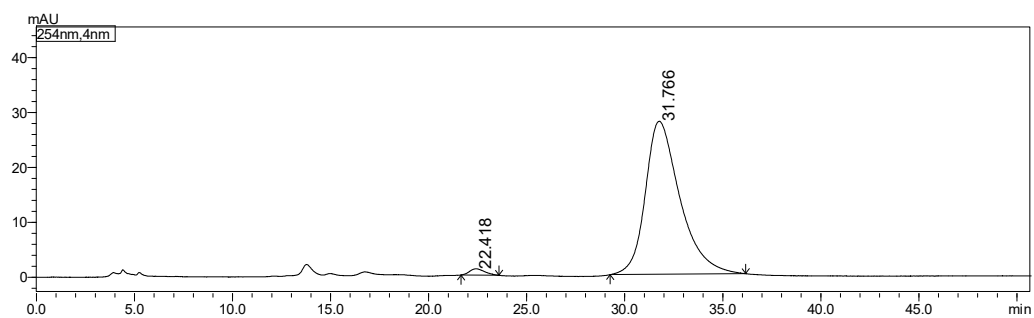

| Peak  | Ret. time | Area    | Height | Area%   | Height% |
|-------|-----------|---------|--------|---------|---------|
| 1     | 22.418    | 61942   | 1156   | 1.776   | 3.978   |
| 2     | 31.766    | 3425970 | 27891  | 98.224  | 96.022  |
| Total |           | 3487913 | 29046  | 100.000 | 100.000 |

**HPLC Spectrum of enantioenriched 6.**

## Supplementary References

- 1 (a) H. Chen, H. Long, X. Cui, J. Zhou, M. Xu, G. Yuan, *J. Am. Chem. Soc.* 2014, **136**, 2583-2591; (b) T. J. Doyon, J. C. Perkins, S. A. Baker Dockrey, E. O. Romero, K. C. Skinner, P. M. Zimmerman, A. R. H. Narayan, *J. Am. Chem. Soc.* 2019, **141**, 20269-20277; (c) T. Chen, N. W. Reich, N. Bell, P. D. Finn, D. Rodriguez, J. Kohler, K. Kozuka, L. He, A. G. Spencer, D. Charmot, M. Navre, C. W. Carreras, S. Koo-McCoy, J. Tabora, J. S. Caldwell, J. W. Jacobs, J. G. Lewis, *J. Med. Chem.* 2018, **61**, 7589-7613.
- 2 (a) K. Lee, J.-M. Rouillard, T. Pham, E. Gulari, J. Kim, *Angew. Chem. Int. Ed.* 2007, **46**, 4667-4670; (b) D. V. Hingorani, E. A. Randtke, M. D. Pagel, *J. Am. Chem. Soc.* 2013, **135**, 6396-6398; (c) T. Noguchi, B. Roy, D. Yoshihara, Y. Tsuchiya, T. Yamamoto, S. Shinkai, *Chem. Eur. J.* 2014, **20**, 13938-13944; (d) M. Takioku, Y. Takamura, M. Fujihara, M. Watanabe, S. Yamada, M. Kawasaki, S. Ito, S. Nakano, H. Kakuta, *ACS Med. Chem. Lett.* 2021, **12**, 1024-1029.
- 3 (a) A. Khan, R. Zheng, Y. Kan, J. Ye, J. Xing, Y. J. Zhang, *Angew. Chem. Int. Ed.* 2014, **53**, 6439-6442; (b) A. Khan, J. Xing, J. Zhao, Y. Kan, W. Zhang, Y. J. Zhang, *Chem. Eur. J.* 2015, **21**, 120-124; (c) W. Guo, L. Martínez-Rodríguez, E. Martin, E. C. Escudero-Adán, A. W. Kleij, *Angew. Chem. Int. Ed.* 2016, **55**, 11037-11040; (d) A. Khan, S. Khan, I. Khan, C. Zhao, Y. Mao, Y. Chen, Y. J. Zhang, *J. Am. Chem. Soc.* 2017, **139**, 10733-10741; (e) S. Singha, T. Patra, C. G. Daniliuc, F. Glorius, *J. Am. Chem. Soc.* 2018, **140**, 3551-3554.
- 4 (a) D. B. Guthrie, D. P. Curran, *Org. Lett.* 2009, **11**, 249-251; (b) S. Mondal, S. Mukherjee, *Org. Lett.* 2022, **24**, 8300-8304.
- 5 (a) G. Yang, S. Sun, Z. Li, Y. Liu, J. Wang, *Commun. Chem.* 2021, **4**, 144; (b) S. Shee, S. Shree Ranganathappa, M. S. Gadhav, R. Gogoi, A. T. Biju, *Angew. Chem. Int. Ed.* 2023, **62**, e202311709; (c) J. Wang, M. Wang, Y. Wen, P. Teng, C. Li, C. Zhao, *Org. Lett.* 2024, **26**, 1040-1045.
- 6 (a) C. Guo, M. Fleige, D. Janssen-Müller, C. G. Daniliuc, F. Glorius, *J. Am. Chem. Soc.* 2016, **138**, 7840-7843; (b) L. Zhou, X. Wu, X. Yang, C. Mou, R. Song, S. Yu, H. Chai, L. Pan, Z. Jin, Y. R. Chi, *Angew. Chem. Int. Ed.* 2020, **59**, 1557-1561; (c) T. Fan, J. Song, L.-Z. Gong, *Angew. Chem. Int. Ed.* 2022, **61**, e202201678.
